# Supplementary material for: Divergent Reactivity of a Dinuclear (NHC)Nickel(I) Catalyst versus Nickel(0) Enables Chemoselective Trifluoromethylselenolation
Source: PubMed Central journal article supplement — Angew Chem Int Ed Engl. 2017 Sep 14;56(43):13431–5. doi: 10.1002/anie.201706423 (PMC5656904; doi:10.1002/anie.201706423), 2017-09-14
Supplement: ANIE-56-13431-s001.pdf [file ANIE-56-13431-s001.pdf]

Supporting Information

**Divergent Reactivity of a Dinuclear (NHC)Nickel(I) Catalyst versus Nickel(0) Enables Chemoselective Trifluoromethylselenolation**

*Alexander B. Dürr<sup>+</sup>, Henry C. Fisher<sup>+</sup>, Indrek Kalvet, Khai-Nghi Truong, and Franziska Schoenebeck\**

anie\_201706423\_sm\_miscellaneous\_information.pdf

|     |                                                                                                                       |    |
|-----|-----------------------------------------------------------------------------------------------------------------------|----|
| 1.  | General experimental details.....                                                                                     | 3  |
| 2.  | General experimental procedures.....                                                                                  | 4  |
| 2.1 | Conversion of grey selenium to red selenium <sup>[1]</sup> .....                                                      | 4  |
| 2.2 | Synthesis of (Me <sub>4</sub> N)SeCF <sub>3</sub> .....                                                               | 4  |
| 2.3 | Procedure for the synthesis of [(SIPr)Ni(μ-I)] <sub>2</sub> (3).....                                                  | 4  |
| 2.4 | General procedure for the synthesis of [(SIPr)Ni(μ-SeCF <sub>3</sub> )] <sub>2</sub> (4).....                         | 5  |
| 2.5 | Kinetic studies.....                                                                                                  | 6  |
| 2.6 | Catalysis with Ni(0) – productive coupling, homocoupling and further side reactions .                                 | 7  |
| 2.7 | General procedure for trifluoromethylselenolation of aryl iodides (procedure A).....                                  | 9  |
| 2.8 | General procedure for trifluoromethylselenolation of polyhalogenated arenes (procedure B) .....                       | 9  |
| 3.  | Compound Characterization Data.....                                                                                   | 10 |
| 4.  | Crystallographic Data for [(SIPr)Ni(μ-I)] <sub>2</sub> (3) and [(SIPr)Ni(μ-SeCF <sub>3</sub> )] <sub>2</sub> (4)..... | 14 |
| 5.  | Computational details .....                                                                                           | 17 |
| 5.1 | Ni(0) pathway and its selectivity .....                                                                               | 17 |
| 5.2 | DFT methods vs the electron structure of Ni(I) dimers .....                                                           | 18 |
| 5.3 | Oxidative addition with Ni(I) dimers.....                                                                             | 18 |
| 5.4 | XYZ coordinates and energies of computed structures .....                                                             | 22 |
| 6.  | NMR Spectra.....                                                                                                      | 72 |
| 7.  | References.....                                                                                                       | 85 |

## 1. General experimental details

*Reagents.* All Reagents were purchased at reagent grade from Acros, Aldrich, ABCR, TCI and Fluka, and used as received unless otherwise stated. Selenium powder was purchased from Aldrich and converted to Se<sub>8</sub> according to a modified literature procedure.<sup>[1]</sup> NiI<sub>2</sub>(dme)<sub>2</sub> was prepared from NiI<sub>2</sub> according to a literature procedure.<sup>[2]</sup>

*Solvents.* THF, toluene, hexane and DCM were purified by solvent purification system (Innovative Technology PS-MD-5). All other anhydrous solvents were purchased from Aldrich and used as received unless stated otherwise. Extraction solvents and column chromatography eluents, *n*-hexane, *n*-pentane, diethyl ether and ethyl acetate were received in technical grade and distilled prior to use.

*Experimental Techniques.* All reactions were carried out under argon atmosphere unless stated otherwise. All reactions involving the (Me<sub>4</sub>N)SeCF<sub>3</sub> reagent were carried out in oven-dried amber glassware under argon atmosphere.

Flash column chromatography was carried out with SiO<sub>2</sub> 60 (particle size 0.040–0.063 mm, 230–400 mesh). Thin-layer chromatography (TLC) was conducted on aluminum sheets coated with SiO<sub>2</sub> 60 F254 obtained from Merck KGaA, Germany. Compounds were visualized under UV light at 254 nm and by an appropriate stain.

*Characterization.* All <sup>1</sup>H NMR, <sup>13</sup>C NMR and <sup>19</sup>F NMR spectra were recorded at ambient temperature either on Varian V-NMRS 600, Varian V-NMRS 400 or Varian Mercury 300 spectrometer. Chemical shifts (δ) are quoted in parts per million (ppm) and were referenced to the residual solvent peak in the case of <sup>1</sup>H (7.26 ppm for CDCl<sub>3</sub>, 5.32 ppm for CD<sub>2</sub>Cl<sub>2</sub>, and 7.16 ppm for C<sub>6</sub>D<sub>6</sub>) and <sup>13</sup>C (77.0 ppm for CDCl<sub>3</sub>, 54.0 ppm for CD<sub>2</sub>Cl<sub>2</sub> and 128.06 for C<sub>6</sub>D<sub>6</sub>) NMR spectra, and added α,α,α-trifluorotoluene (δ = -62.73 ppm) in the case of <sup>19</sup>F NMR. Coupling constants (*J*) are given in Hz. The resonance multiplicity is described as s (singlet), d (doublet), t (triplet), q (quartet), quint. (quintet), hept. (heptet), m (multiplet), dd (doublet of doublets) and br. (broad). <sup>13</sup>C and <sup>19</sup>F NMR spectra are proton decoupled.

Mass spectrometric analysis was performed on Finnigan MAT 95 apparatus using EI ionization. GC-MS analyses were performed using an Agilent Technologies 5975 series MSD mass spectrometer coupled with an Agilent Technologies 7820A gas chromatograph equipped with an Agilent 19091s-433 HP-SMS column (30 m × 0.250 μm × 0.25 μm).

Melting points were measured with a LLG Labware MPM-H2 apparatus.

## 2. General experimental procedures

### 2.1 Conversion of grey selenium to red selenium<sup>[1]</sup>

Grey selenium (1.70 g, 21.5 mmol, 1.0 equiv.) was added to conc. sulfuric acid (100 mL) and the reaction mixture stirred at 180°C for 6 h. The reaction mixture was filtered through a sintered funnel directly onto ice (250 mL) and the resulting solution left to recrystallize at 4°C overnight. The mixture was then filtered and the obtained red solid was washed with cold water (3 x 20 mL) and Et<sub>2</sub>O (3 x 20 mL). The resulting red powder was then dried overnight *in vacuo* to give 1.65 g (97%) of Se<sub>8</sub>.

### 2.2 Synthesis of (Me<sub>4</sub>N)SeCF<sub>3</sub>

Red selenium (Se(red), 1.25 g, 15.8 mmol, 1.0 equiv.) and trifluoromethyl(trimethyl)silane (2.48 g, 17.4 mmol, 1.1 equiv.) were added to anhydrous THF (100 mL). The reaction mixture was stirred at -65°C under strict exclusion of light for 1 hour. Tetramethylammonium fluoride (1.46 g, 15.8 mmol, 1.0 equiv.) was then added in one portion and the reaction mixture was allowed to warm to room temperature and stirred for 12 h in darkness. The solvent was filtered through a short plug of celite and the filtrate was discarded. The plug of celite was then washed with 30 mL of dry MeCN. The filtrate was concentrated to approximately 10 mL. Addition of 90 mL of dry Et<sub>2</sub>O resulted in precipitation of a white solid. Filtration gave the product as a white powder. (3.0 g, 86%). <sup>1</sup>H NMR (400 MHz, acetone-*d*<sub>6</sub>) δ 3.20 (12H, s, N-CH<sub>3</sub>). <sup>19</sup>F NMR (376 MHz, acetone-*d*<sub>6</sub>) δ -6.57. These data are in agreement with those reported previously in the literature.<sup>[3]</sup>

### 2.3 Procedure for the synthesis of [(SIPr)Ni(μ-I)]<sub>2</sub> (3)

A 20-mL scintillation vial equipped with a stir bar was charged with Ni(cod)<sub>2</sub> (126 mg, 0.46 mmol), NiI<sub>2</sub>(dme)<sub>2</sub> (213 mg, 0.46 mmol), and SIPr (355 mg, 0.91 mmol). 8 mL of benzene were added and the resulting suspension was stirred *vigorously* at room temperature for 14 hours. The solution turns dark during this time. The reaction mixture was filtered over a pad of celite (~ 2 cm) on a narrow fritted funnel (Por. 4, 2 cm diameter, 10 cm length) and concentrated to ~2-3 mL under vacuum, 16 mL of hexane was added and the mixture was cooled to -25 °C. The product precipitated overnight as a yellow powder which was then isolated by filtration over a medium frit and washed with 3 x 2 mL of cold hexane to yield 402 mg of complex **3** (80% yield). <sup>1</sup>H NMR (600 MHz, C<sub>6</sub>D<sub>6</sub>) δ 7.2-7.12 (m, 12H, H<sub>Ar</sub>), 3.62 – 3.50 (m, 8H, CHMe<sub>2</sub>), 2.96 (s, 8H, NCH<sub>2</sub>CH<sub>2</sub>N), 2.35 (d, *J* = 6.7 Hz, 24H, CHMe<sub>2</sub>), 1.16 (d, *J* = 6.8 Hz, 24H, CHMe<sub>2</sub>). <sup>13</sup>C NMR (151 MHz, C<sub>6</sub>D<sub>6</sub>) δ 210.7, 147.1, 137.6, 128.7, 124.4, 52.5, 29.0, 25.8. Crystals suitable for X-Ray diffraction analysis were obtained *via* slow evaporation of Et<sub>2</sub>O at room temperature.

## 2.4 General procedure for the synthesis of [(SIPr)Ni( $\mu$ -SeCF<sub>3</sub>)<sub>2</sub>]<sub>2</sub> (**4**)

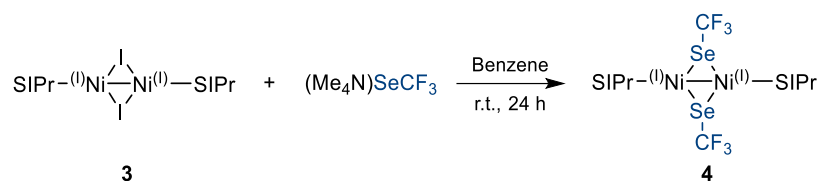

[(SIPr)Ni( $\mu$ -I)]<sub>2</sub> (164 mg, 0.15 mmol, 1.0 equiv.), (Me<sub>4</sub>N)SeCF<sub>3</sub> (138 mg, 0.62 mmol, 4.0 equiv.) and dry benzene (8.0 mL) were added in an oven-dried, amber-colored reaction vial equipped with a stirring bar. The reaction was stirred vigorously for 24 h at ambient temperature, then filtered over a pad of celite (~ 2 cm) on a narrow fritted funnel (Por. 4, 2 cm diameter, 10 cm length) and the solvent evaporated completely to give 174 mg of [(SIPr)Ni( $\mu$ -SeCF<sub>3</sub>)<sub>2</sub>]<sub>2</sub> as a reddish solid in 94% isolated yield. <sup>1</sup>H NMR (600 MHz, C<sub>6</sub>D<sub>6</sub>)  $\delta$  7.28 (dd,  $J = 7.6, 7.6$  Hz, 4H,  $H_{Ar}$ ), 7.20 (d,  $J = 7.6$  Hz, 8H,  $H_{Ar}$ ), 3.49 (m, 8H,  $CHMe_2$ ), 3.32 (s, 8H,  $NCH_2CH_2N$ ), 1.65 (d,  $J = 6.8$  Hz, 24H,  $CHMe_2$ ), 1.14 (d,  $J = 6.9$  Hz, 24H,  $CHMe_2$ ). <sup>13</sup>C NMR (151 MHz, C<sub>6</sub>D<sub>6</sub>)  $\delta$  214.7, 147.3, 137.8, 128.8, 124.7, 53.5, 28.9, 26.1, 24.6. <sup>19</sup>F NMR (564 MHz, C<sub>6</sub>D<sub>6</sub>)  $\delta$  -21.47. Crystals suitable for X-Ray diffraction analysis were obtained *via* slow evaporation of Et<sub>2</sub>O at room temperature.

## 2.5 Kinetic studies

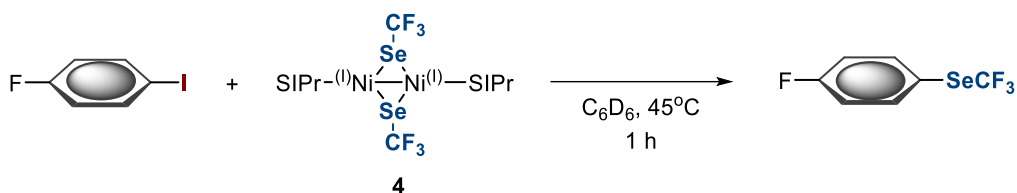

Inside a glovebox an NMR tube was charged with 0.3 mL of a solution of  $[(\text{SIPrNi}(\mu\text{-SeCF}_3))_2]$  **4** (varying concentration in  $\text{C}_6\text{D}_6$ , see Figure S1) and frozen at  $-25^\circ\text{C}$ . Then, 0.3 mL of 1-iodo-4-fluorobenzene (constant concentration: 0.33 M) containing a known amount of internal standard 4-trifluoromethoxyanisole in  $\text{C}_6\text{D}_6$  was added, and the contents of the tube were again frozen in the freezer. The reaction mixture was then, still in the frozen state, submitted to the NMR spectrometer which was preheated to  $45^\circ\text{C}$ . The reaction was monitored *in situ* using  $^{19}\text{F}$  NMR (relaxation delay: 10 s; pulse angle  $90^\circ$ ) for one hour.

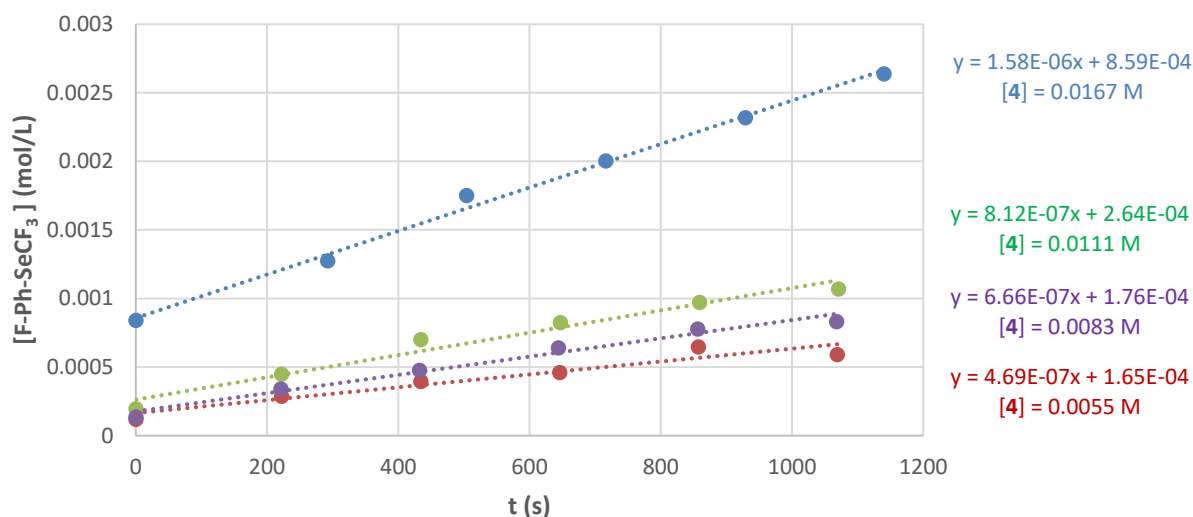

**Figure S1.** Product formation over time depending on different concentrations of **4**.

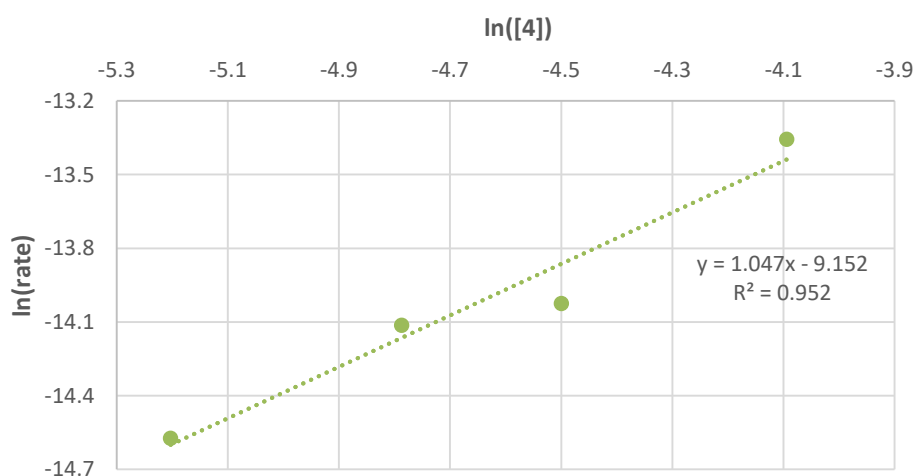

**Figure S2.** First order dependence of reaction rate in the concentration of the  $\text{SeCF}_3$ -bridged Ni(I) dimer **4**.

## 2.6 Catalysis with Ni(0) – productive coupling, homocoupling and further side reactions

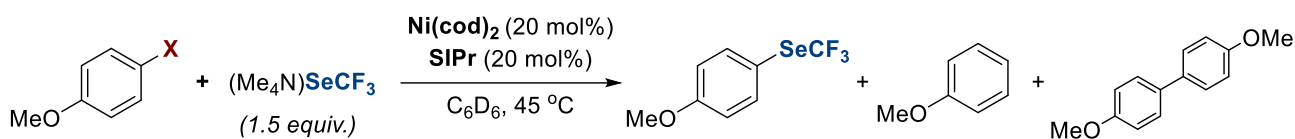

Inside an Ar-filled glovebox, Ni(cod)<sub>2</sub> and SIPr were dissolved in 0.5 mL of C<sub>6</sub>D<sub>6</sub> and stirred for 5 minutes, after which the solution was added to a mixture of 4-haloanisole (23.4 mg, 0.1 mmol, 1.0 equiv.) and (Me<sub>4</sub>N)SeCF<sub>3</sub> (33.2 mg, 0.15 mmol, 1.5 equiv.) in 0.5 mL of C<sub>6</sub>D<sub>6</sub> in an amber vial equipped with a stirring bar.

All reactions were performed in duplicate, and were analyzed by quantitative <sup>1</sup>H NMR after 30 minutes (Figures S3 and S4), and after 18 hours. Virtually no changes in the composition of the mixture were observed when comparing these two time-points.

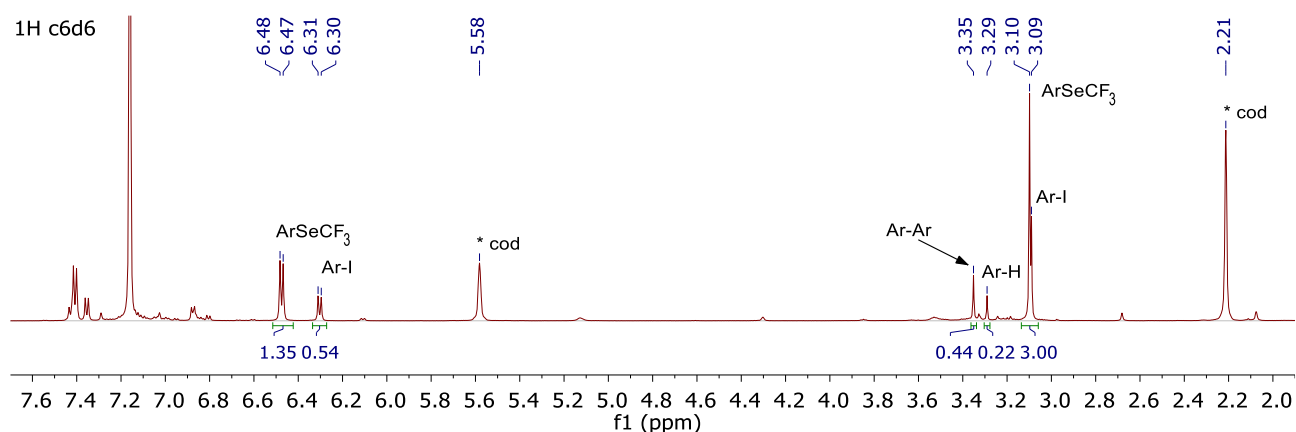

**Figure S3.** <sup>1</sup>H NMR spectrum of Ni(0)-catalyzed reaction with 4-iodoanisole after 30 minutes.

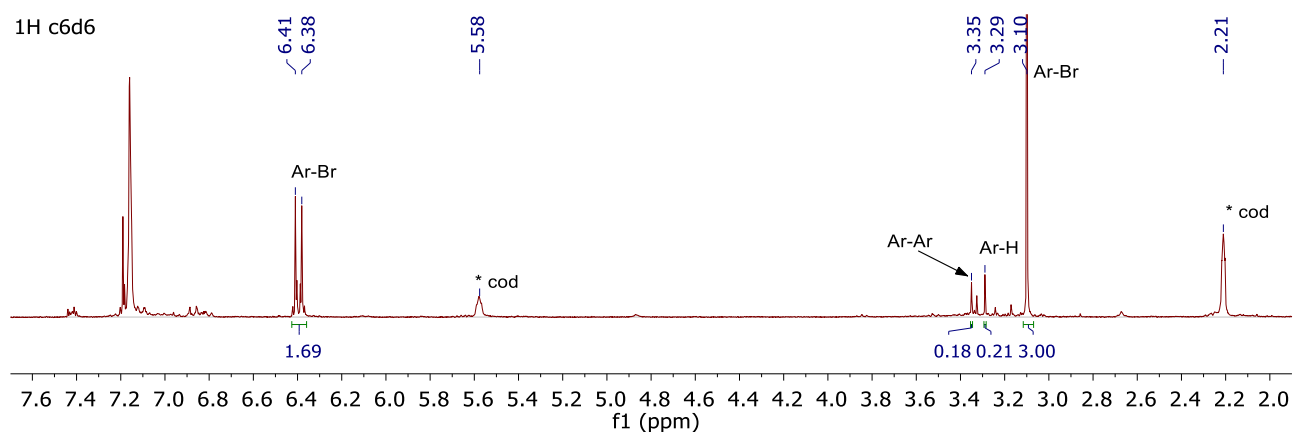

**Figure S4.** <sup>1</sup>H NMR spectrum of Ni(0)-catalyzed reaction with 4-bromoanisole after 30 minutes.

$^1\text{H}$  NMR shifts of the involved anisole derivatives were also measured independently in  $\text{C}_6\text{D}_6$  as reference:

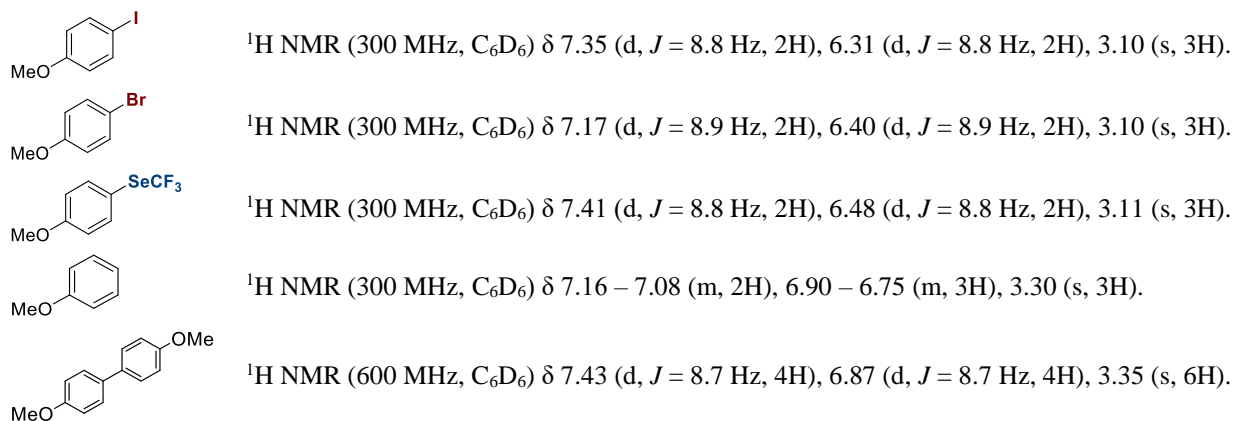

For full data of the generated products, see below in the compound characterization section.



## 2.7 General procedure for trifluoromethylselenolation of aryl iodides (procedure A)

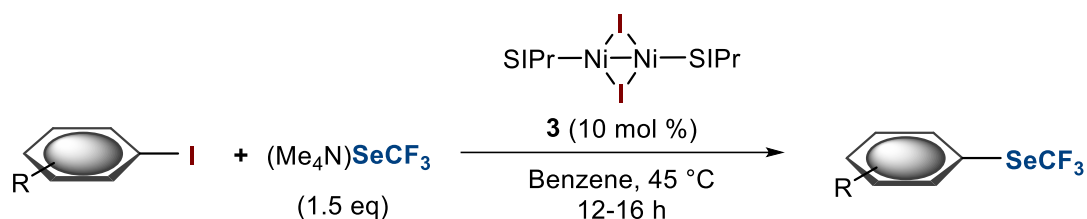

Inside a glovebox, aryl iodide (0.1 mmol, 1.0 equiv.),  $(\text{Me}_4\text{N})\text{SeCF}_3$  (33.3 mg, 0.15 mmol, 1.5 equiv.) and Ni-I-dimer **3** (10.9 mg, 0.01 mmol, 10 mol%) were added to a dry, amber reaction vial equipped with a stirring bar. Followingly, benzene (1.0 ml) was added and the reaction was stirred in the glovebox for 12-16 h at 45 °C. The flask was removed from the glovebox and the mixture was subsequently diluted with  $\text{Et}_2\text{O}$  and filtered through a short pad of silica gel using  $\text{Et}_2\text{O}$  as eluent. The product was purified by flash column chromatography using the indicated eluent mixture. Conversion to the desired coupling product was determined by quantitative  $^{19}\text{F}$  NMR analysis using  $\alpha,\alpha,\alpha$ -trifluorotoluene as an internal standard, unless stated otherwise.

## 2.8 General procedure for trifluoromethylselenolation of polyhalogenated arenes (procedure B)

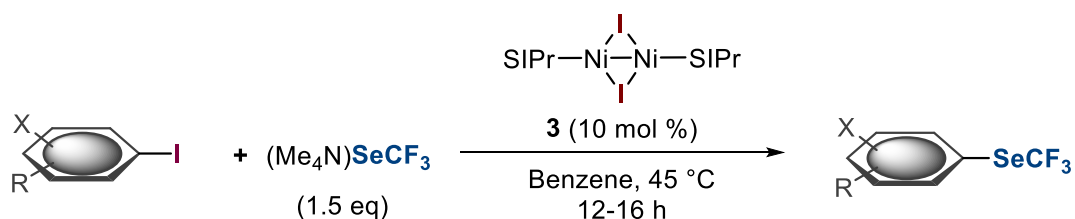

Inside a glovebox, aryl iodide (0.2 mmol, 1.0 equiv.),  $(\text{Me}_4\text{N})\text{SeCF}_3$  (66.5 mg, 0.3 mmol, 1.5 equiv.) and Ni-I-dimer **3** (21.9 mg, 0.02 mmol, 10 mol%) were added in a dry, amber reaction vial equipped with a stirring bar. Then benzene (2.0 ml) was added to the reaction mixture. The reaction was stirred in the glovebox for 12-16 h at 45 °C. The flask was removed from the glovebox and the mixture was subsequently filtered through a short pad of silica gel. The product was purified by flash column chromatography using the indicated eluent mixture. In case of volatile coupling products, careful evaporation of solvents was key to ensuring high isolated yields.

### 3. Compound Characterization Data

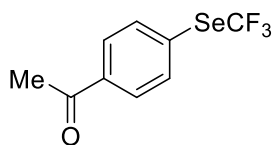

**1-(4-(trifluoromethylseleno)phenyl)ethanone (5a):** Prepared following procedure A. The residue was purified by flash chromatography on silica gel using as eluent a mixture of pentane/Et<sub>2</sub>O (99:1), to afford the title compound as a colorless oil (25 mg, 92%). <sup>1</sup>H NMR (400 MHz, CD<sub>2</sub>Cl<sub>2</sub>) δ 7.95 (d, *J* = 8.6 Hz, 2H), 7.85 (d, *J* = 8.5 Hz, 2H), 2.60 (s, 3H). <sup>13</sup>C NMR (151 MHz, CD<sub>2</sub>Cl<sub>2</sub>) δ 197.6, 138.4, 137.2, 129.6, 128.5, 123.1 (q, *J* = 332.6 Hz), 27.1. <sup>19</sup>F NMR (376 MHz, CD<sub>2</sub>Cl<sub>2</sub>) δ -35.83 (s). MS (70eV, EI): *m/z* 368 (59, <sup>80</sup>Se) 266 (29, <sup>78</sup>Se) [M<sup>+</sup>], 253 (100, <sup>80</sup>Se) 251 (49, <sup>78</sup>Se), 184 (79, <sup>80</sup>Se) 182 (39, <sup>78</sup>Se), 169 (22), 156 (33, <sup>80</sup>Se) 154 (16, <sup>78</sup>Se), 145 (29). These data are in agreement with those reported previously in the literature.<sup>[4]</sup>

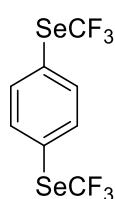

**1,4-bis[(trifluoromethyl)seleno]-benzene (5b):** Prepared following procedure B. The residue was purified by flash chromatography on silica gel using as eluent pure pentane, to afford the title compound as a white solid (74 mg, 99%). M.p. 48 – 49°C. <sup>1</sup>H NMR (600 MHz, CD<sub>2</sub>Cl<sub>2</sub>) δ 7.78 (s, 4H). <sup>13</sup>C NMR (151 MHz, CD<sub>2</sub>Cl<sub>2</sub>) δ 138.2, 125.9, 123.1 (q, *J* = 332.7 Hz). <sup>19</sup>F NMR (564 MHz, CD<sub>2</sub>Cl<sub>2</sub>) δ -36.02. MS (70eV, EI): *m/z* (%): 376 (31, <sup>82</sup>Se/<sup>80</sup>Se) 374 (100, <sup>80</sup>Se/<sup>80</sup>Se, <sup>82</sup>Se/<sup>78</sup>Se) 372 (89, <sup>82</sup>Se/<sup>76</sup>Se, <sup>80</sup>Se/<sup>78</sup>Se) 370 (54, <sup>80</sup>Se/<sup>76</sup>Se, <sup>78</sup>Se/<sup>78</sup>Se) [M<sup>+</sup>], 307 (23, <sup>82</sup>Se/<sup>80</sup>Se) 305 (74, <sup>80</sup>Se/<sup>80</sup>Se, <sup>82</sup>Se/<sup>78</sup>Se) 303 (66, <sup>82</sup>Se/<sup>76</sup>Se, <sup>80</sup>Se/<sup>78</sup>Se) 301 (40, <sup>80</sup>Se/<sup>76</sup>Se, <sup>78</sup>Se/<sup>78</sup>Se), 275 (30, also with *Se* isotopes), 238 (21, <sup>82</sup>Se/<sup>80</sup>Se) 236 (69, <sup>80</sup>Se/<sup>80</sup>Se, <sup>82</sup>Se/<sup>78</sup>Se) 234 (61, <sup>82</sup>Se/<sup>76</sup>Se, <sup>80</sup>Se/<sup>78</sup>Se) 232 (37, <sup>80</sup>Se/<sup>76</sup>Se, <sup>78</sup>Se/<sup>78</sup>Se), 156 (40, also with *Se* isotopes), 117 (14), 69 (19). HRMS (EI) calculated for C<sub>8</sub>H<sub>4</sub>F<sub>6</sub><sup>80</sup>Se<sub>2</sub>: 373.8542 [M<sup>+</sup>], found: 373.8537.

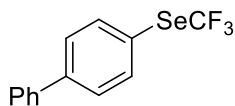

**4-[(trifluoromethyl)seleno]biphenyl (5c):** Prepared following procedure A. The residue was purified by flash chromatography on silica gel using hexane as eluent, to afford the title compound as a white solid (30 mg, 99%). <sup>1</sup>H NMR (600 MHz, CD<sub>2</sub>Cl<sub>2</sub>) δ 7.83 (d, *J* = 8.3 Hz, 2H), 7.65 (d, *J* = 8.3 Hz, 2H), 7.62 (d, *J* = 7.4 Hz, 2H), 7.50 – 7.45 (m, 2H), 7.43 – 7.37 (m, 1H). <sup>13</sup>C NMR (151 MHz, CD<sub>2</sub>Cl<sub>2</sub>) δ 143.9, 140.2, 138.0, 129.5, 128.8, 128.7, 127.7, 123.3 (q, *J* = 332.8 Hz), 121.8. <sup>19</sup>F NMR (376 MHz, CD<sub>2</sub>Cl<sub>2</sub>) δ -36.63. MS (70eV, EI): *m/z* (%) 302 (84, <sup>80</sup>Se) 300 (41, <sup>78</sup>Se) [M<sup>+</sup>], 233 (100, <sup>80</sup>Se) 231 (50, <sup>78</sup>Se), 152 (96). These data are in agreement with those reported previously in the literature.<sup>[5]</sup>

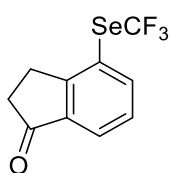

**4-[(trifluoromethyl)seleno]-1-indanone (5d):** Prepared following procedure A. The residue was purified by flash chromatography on silica gel using as eluent mixture hexane/Et<sub>2</sub>O (95:5), to afford the title compound as yellow oil (27 mg, 96%). <sup>1</sup>H NMR (600 MHz, CDCl<sub>3</sub>) δ 8.01 (d, *J* = 7.5 Hz, 1H), 7.89 (d, *J* = 7.5 Hz, 1H), 7.46 – 7.42 (m, 1H), 3.29 – 3.24 (m, 2H), 2.78 – 2.73 (m, 2H). <sup>13</sup>C NMR (151 MHz, CDCl<sub>3</sub>) δ 206.0, 160.0, 144.1, 138.5, 128.8, 126.4, 122.5 (q, *J* = 333.3 Hz), 121.7, 36.1, 27.5. <sup>19</sup>F NMR (564 MHz, CDCl<sub>3</sub>) δ -34.75. MS (70eV, EI): *m/z* (%): 280 (100, <sup>80</sup>Se) 278 (50, <sup>78</sup>Se) [M<sup>+</sup>], 211 (80, <sup>80</sup>Se) 209 (40, <sup>78</sup>Se), 183 (56), 102 (69), 91 (22). These data are in agreement with those reported previously in the literature.<sup>[5]</sup>

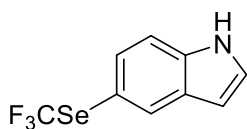

**5-[(trifluoromethyl)seleno]indole (5e):** Prepared following procedure A. The residue was purified by flash chromatography on silica gel using as eluent a gradient mixture of pentane/Et<sub>2</sub>O (from pure pentane to 1:1), to afford the title compound as a colorless oil (24 mg, 89%). <sup>1</sup>H (600 MHz, CDCl<sub>3</sub>) δ 8.30 (br, 1H), 8.08 (s, 1H), 7.55 (d, *J* = 8.4 Hz, 1H), 7.41 (d, *J* = 8.4 Hz, 1H), 7.29–7.26 (m, 1H), 6.62–6.59 (m, 1H). <sup>13</sup>C (151 MHz, CDCl<sub>3</sub>) δ 136.4, 130.8, 130.5, 128.9, 125.4, 122.7 (q, *J* = 333.2 Hz), 112.5, 112.0, 103.1. <sup>19</sup>F NMR (564 MHz, CDCl<sub>3</sub>) δ -37.25. MS (70eV, EI): *m/z* (%): 265 (79, <sup>80</sup>Se) 263 (39, <sup>78</sup>Se) [M<sup>+</sup>], 196 (100, <sup>80</sup>Se) 194 (51, <sup>78</sup>Se), 166 (18), 116 (18), 89 (15). These data are in agreement with those reported previously in the literature.<sup>[5]</sup>

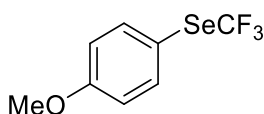

**1-methoxy-4-[(trifluoromethyl)seleno]benzene (5f):** Procedure A was followed for the synthesis of the product **5c**. The residue was purified by flash chromatography on silica gel using pure pentane as eluent, to afford the title compound as a colourless oil (25 mg, 98%). <sup>1</sup>H NMR (600 MHz, CDCl<sub>3</sub>) δ 7.66 (d, *J* = 8.6 Hz, 2H), 6.91 (d, *J* = 8.6 Hz, 2H), 3.83 (s, 3H). <sup>13</sup>C NMR (151 MHz, CDCl<sub>3</sub>) δ 161.4, 138.9, 122.1 (q, *J* = 332.7), 115.2, 112.9, 55.4. <sup>19</sup>F (564 MHz, CDCl<sub>3</sub>) -37.20. MS (70eV, EI): *m/z* (%): 256 (76, <sup>80</sup>Se) 254 (37, <sup>78</sup>Se) [M<sup>+</sup>], 187 (100, <sup>80</sup>Se) 185 (49, <sup>78</sup>Se), 172 (27), 157 (21), 144 (17). These data are in agreement with those reported previously in the literature.<sup>[5]</sup>

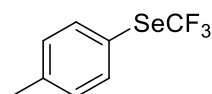

**1-methyl-4-[(trifluoromethyl)seleno]benzene (5g):** Prepared following procedure A. The residue was purified by flash chromatography on silica gel using pentane as eluent, to afford the title compound as a colourless oil (21 mg, 88%). <sup>1</sup>H NMR (600 MHz, CDCl<sub>3</sub>) δ 7.63 (d, *J* = 8.0 Hz, 2H), 7.20 (d, *J* = 8.0 Hz, 2H), 2.39 (s, 3H). <sup>13</sup>C NMR (151 MHz, CDCl<sub>3</sub>) δ 140.7, 137.1, 130.4, 122.5 (q, *J* = 332.8 Hz), 119.0, 21.3. <sup>19</sup>F (564 MHz, CDCl<sub>3</sub>) -36.55. MS (70eV, EI): *m/z* (%): 240 (97, <sup>80</sup>Se) 238 (47, <sup>78</sup>Se) [M<sup>+</sup>], 171 (100, <sup>80</sup>Se) 169 (57, <sup>78</sup>Se), 141 (25), 91 (70). These data are in agreement with those reported previously in the literature.<sup>[5]</sup>

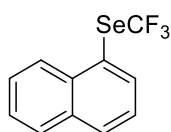

**2-[(trifluoromethyl)seleno]naphthalene (5h):** Prepared following procedure A. The residue was purified by flash chromatography on silica gel using pure pentane as eluent, to afford the title compound as a light yellow oil (19 mg, 70%). <sup>1</sup>H NMR (600 MHz, CDCl<sub>3</sub>) δ 8.49 (d, *J* = 8.5 Hz, 1H), 8.08 (d, *J* = 7.1 Hz, 1H), 8.00 (d, *J* = 8.2 Hz, 1H), 7.89 (d, *J* = 8.2 Hz, 1H), 7.66 – 7.62 (m, 1H), 7.59 – 7.55 (m, 1H), 7.50 – 7.46 (m, 1H). <sup>13</sup>C NMR (151 MHz, CDCl<sub>3</sub>) δ 138.5, 135.3, 134.2, 132.0, 128.6, 128.1, 127.6, 126.7, 125.8, 122.5 (d, *J* = 334.0 Hz), 122.1. <sup>19</sup>F NMR (564 MHz, CDCl<sub>3</sub>) δ -35.44. MS (70eV, EI): *m/z* (%): 276 (75, <sup>80</sup>Se) 274 (37, <sup>78</sup>Se) [M<sup>+</sup>], 207 (100, <sup>80</sup>Se) 205 (50, <sup>78</sup>Se), 126 (30), 115 (69). These data are in agreement with those reported previously in the literature.<sup>[5]</sup>

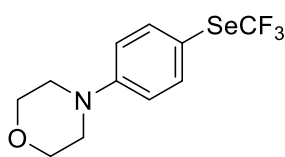

**1-morpholino-4-[(trifluoromethyl)seleno]benzene (5i):** Prepared following procedure A. The residue was purified by flash chromatography on silica gel using as eluent a gradient mixture of hexane/Et<sub>2</sub>O (from pure hexane to 9:1), to afford the title compound as a yellow oil (28 mg, 90%).

<sup>1</sup>H (600 MHz, CDCl<sub>3</sub>) δ 7.61 (d, *J* = 8.9 Hz, 2H), 6.86 (d, *J* = 8.9 Hz, 2H), 3.88–3.83 (m, 4H), 3.26–3.20 (m, 4H). <sup>13</sup>C (151 MHz, CDCl<sub>3</sub>) δ 152.5, 138.6, 122.5 (q, *J* = 333.6 Hz), 115.5, 111.0, 66.7, 48.1. <sup>19</sup>F NMR (376 MHz, CDCl<sub>3</sub>) δ -37.34. MS (70eV, EI): *m/z* (%): 311 (92, <sup>80</sup>Se) 309 (46, <sup>78</sup>Se) [M<sup>+</sup>], 253 (21, <sup>80</sup>Se) 251 (10, <sup>78</sup>Se), 242 (100, <sup>80</sup>Se) 240 (50, <sup>78</sup>Se), 184 (71, <sup>80</sup>Se) 182 (35, <sup>78</sup>Se), 156 (11). These data are in agreement with those reported previously in the literature.<sup>[5]</sup>

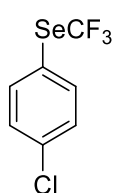

**1-[(trifluoromethyl)seleno]-4-chlorobenzene (6a):** Prepared following procedure B.

The residue was purified by flash chromatography on silica gel using as eluent pure pentane, to afford the title compound as a colorless oil (39 mg, 75%). <sup>1</sup>H NMR (400 MHz, CD<sub>2</sub>Cl<sub>2</sub>) δ 7.71 (d, *J* = 8.4 Hz, 2H), 7.41 (d, *J* = 8.5 Hz, 2H). <sup>13</sup>C NMR (151 MHz, CD<sub>2</sub>Cl<sub>2</sub>) δ 139.0, 137.7, 130.5, 123.1 (q, *J* = 332.6 Hz), 121.2. <sup>19</sup>F NMR (376 MHz, CD<sub>2</sub>Cl<sub>2</sub>) δ -36.72. MS (70eV, EI): *m/z* (%): 262 (39, <sup>80</sup>Se/<sup>37</sup>Cl, <sup>82</sup>Se/<sup>35</sup>Cl) 260 (90, <sup>80</sup>Se/<sup>35</sup>Cl, <sup>78</sup>Se/<sup>37</sup>Cl) 258 (42, <sup>78</sup>Se/<sup>35</sup>Cl, <sup>76</sup>Se/<sup>37</sup>Cl) [M<sup>+</sup>], 193 (44, <sup>80</sup>Se/<sup>37</sup>Cl, <sup>82</sup>Se/<sup>35</sup>Cl) 191 (100, <sup>80</sup>Se/<sup>35</sup>Cl, <sup>78</sup>Se/<sup>37</sup>Cl) 189 (47, <sup>78</sup>Se/<sup>35</sup>Cl, <sup>76</sup>Se/<sup>37</sup>Cl), 161 (18), 156 (41), 75 (20). These data are in agreement with those reported previously in the literature.<sup>[6]</sup>

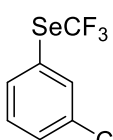

**1-[(trifluoromethyl)seleno]-3-chlorobenzene (6b):** Prepared following procedure B.

The residue was purified by flash chromatography on silica gel using as eluent pure pentane, to afford the title compound as a colorless oil (40 mg, 76%). <sup>1</sup>H NMR (600 MHz, CD<sub>2</sub>Cl<sub>2</sub>) δ 7.78 (s, 1H), 7.66 (d, *J* = 7.8 Hz, 1H), 7.53 – 7.45 (m, 1H), 7.41 – 7.31 (dd, *J* = 8.0, 7.9 Hz, 1H). <sup>13</sup>C NMR (151 MHz, CD<sub>2</sub>Cl<sub>2</sub>) δ 137.1, 135.7, 135.5, 131.3, 131.2, 124.1, 123.1 (q, *J* = 332.7 Hz). <sup>19</sup>F NMR (376 MHz, CD<sub>2</sub>Cl<sub>2</sub>) δ -36.34. MS (70eV, EI): *m/z* (%): 262 (37, <sup>80</sup>Se/<sup>37</sup>Cl, <sup>82</sup>Se/<sup>35</sup>Cl) 260 (85, <sup>80</sup>Se/<sup>35</sup>Cl, <sup>78</sup>Se/<sup>37</sup>Cl) 258 (41, <sup>78</sup>Se/<sup>35</sup>Cl, <sup>76</sup>Se/<sup>37</sup>Cl) [M<sup>+</sup>], 193 (44, <sup>80</sup>Se/<sup>37</sup>Cl, <sup>82</sup>Se/<sup>35</sup>Cl) 191 (100, <sup>80</sup>Se/<sup>35</sup>Cl, <sup>78</sup>Se/<sup>37</sup>Cl) 189 (47, <sup>78</sup>Se/<sup>35</sup>Cl, <sup>76</sup>Se/<sup>37</sup>Cl), 156 (41), 75 (21). HRMS (EI) calculated for C<sub>7</sub>H<sub>4</sub>F<sub>3</sub><sup>35</sup>Cl<sup>80</sup>Se: 259.9113 [M<sup>+</sup>], found: 259.9118.

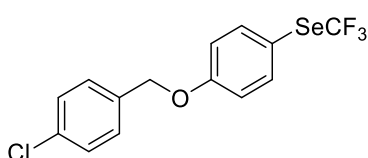

**1-chloro-4-[(4-[(trifluoromethyl)seleno]phenoxy)methyl]benzene (6c):** Prepared following procedure A.

The residue was purified by flash chromatography on silica gel using as eluent pure pentane, to afford the title compound as a white solid (29 mg, 80%). M.p. 51 - 52 °C <sup>1</sup>H NMR (600 MHz, CDCl<sub>3</sub>) δ 7.69 – 7.62 (m, 2H), 7.41 – 7.34 (m, 4H), 7.00 – 6.92 (m, 2H), 5.05 (s, 2H). <sup>13</sup>C NMR (151 MHz, CDCl<sub>3</sub>) δ 160.3, 139.0, 134.8, 134.1, 128.9, 128.8, 122.5 (q, *J* = 333.2 Hz), 116.0, 113.5, 69.3. <sup>19</sup>F NMR (564 MHz, CDCl<sub>3</sub>) δ -37.06. HRMS (EI) calculated for C<sub>14</sub>H<sub>10</sub>O F<sub>3</sub><sup>35</sup>Cl<sup>80</sup>Se: 365.9530 [M<sup>+</sup>], found: 365.9532.

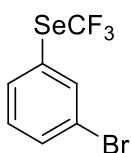

**1-bromo-3-[(trifluoromethyl)seleno]benzene (7a):** Prepared following procedure B. The residue was purified by flash chromatography on silica gel using as eluent pure pentane, to afford the title compound as a colorless oil (56 mg, 92%).  $^1\text{H}$  NMR (400 MHz,  $\text{CDCl}_3$ )  $\delta$  7.94 (s, 1H), 7.71 (d,  $J = 7.7$  Hz, 1H), 7.64 (d,  $J = 8.0$  Hz, 1H), 7.36 – 7.27 (m, 1H).  $^{13}\text{C}$  NMR (151 MHz,  $\text{CDCl}_3$ )  $\delta$  139.5, 135.6, 133.7, 131.0, 124.0, 123.2, 122.5 (q,  $J = 332.8$  Hz).  $^{19}\text{F}$  NMR (376 MHz,  $\text{CDCl}_3$ )  $\delta$  -35.70. HRMS (EI) calculated for  $\text{C}_7\text{H}_4\text{BrF}_3\text{Se}$ : 303.8608 [ $\text{M}^+$ ], found: 303.8604.

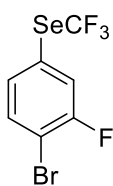

**1-bromo-2-fluoro-4-[(trifluoromethyl)seleno]benzene (7b):** Prepared following procedure B. The residue was purified by flash chromatography on silica gel using as eluent pure pentane, to afford the title compound as a colorless oil (64 mg, 99%).  $^1\text{H}$  NMR (400 MHz,  $\text{CDCl}_3$ )  $\delta$  7.60 (dd,  $J = 8.2, 7.0$  Hz, 1H), 7.53 (dd,  $J = 7.8, 1.9$  Hz, 1H), 7.41 (dd,  $J = 8.3, 1.9$  Hz, 1H).  $^{13}\text{C}\{^1\text{H}\}$  NMR (151 MHz,  $\text{CDCl}_3$ )  $\delta$  159.0 (d,  $J = 252.7$  Hz,  $\text{C}_{\text{Ar-F}}$ ), 134.6, 133.8, 124.9 (d,  $^2J = 23.2$  Hz,  $\text{Br-C}_{\text{Ar}}\text{-C}_{\text{Ar-F}}$ ), 122.5, 122.3 (q,  $J = 333.0$  Hz,  $\text{Ar-SeCF}_3$ ), 112.6 (d,  $^2J = 20.8$  Hz,  $\text{H-C}_{\text{Ar}}\text{-C}_{\text{Ar-F}}$ ).  $^{13}\text{C}\{^1\text{H}, ^{19}\text{F}\}$  NMR (101 MHz,  $\text{CDCl}_3$ )  $\delta$  159.0, 134.6, 133.8, 124.9, 122.5, 112.6.  $^{19}\text{F}$  NMR (376 MHz,  $\text{CDCl}_3$ )  $\delta$  -35.73 ( $-\text{SeCF}_3$ ), -104.31 ( $\text{C}_{\text{Ar-F}}$ ). HRMS (EI) calculated for  $\text{C}_7\text{H}_3\text{F}_4\text{BrSe}$ : 321.8514 [ $\text{M}^+$ ], found: 321.8514.

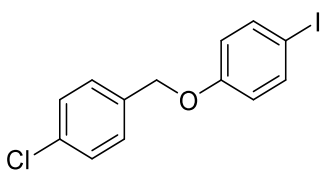

**1-chloro-4-[(4-iodophenoxy)methyl]benzene:** 4-iodophenol (300 mg, 1.36 mmol, 1 equiv.) and  $\text{K}_2\text{CO}_3$  (282 mg, 2.04 mmol, 1.5 equiv.) were dissolved in 30 mL DMF. 4-chloro-benzylbromide (336 mg, 1.63 mmol, 1.2 equiv.) was added and the reaction was stirred at room temperature for 14 hours. Then,  $\text{Et}_2\text{O}$  was added (20 mL) and the organic phase was washed with water (40 mL), 1M NaOH (40 mL) and brine (40 mL). The ether phase was dried over  $\text{Na}_2\text{SO}_4$  and evaporated. The residue was purified by flash chromatography on silica gel using as eluent pure pentane to afford the title compound as a white solid (375 mg, 80%). M.p. 108-109 °C.  $^1\text{H}$  NMR (600 MHz,  $\text{CDCl}_3$ )  $\delta$  7.59 – 7.33 (m, 2H), 7.37 – 7.33 (m, 4H), 6.75 – 6.69 (m, 2H), 5.00 (s, 2H).  $^{13}\text{C}$  NMR (151 MHz,  $\text{CDCl}_3$ )  $\delta$  158.5, 138.4, 135.1, 134.1, 129.0, 128.9, 117.4, 83.4, 69.4. HRMS (EI) calculated for  $\text{C}_{13}\text{H}_{10}\text{ClI}$ : 343.9460 [ $\text{M}^+$ ], found: 343.9461.

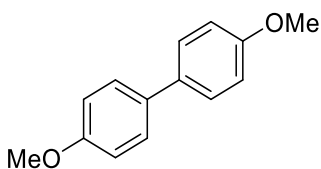

**4,4'-dimethoxy-1,1'-biphenyl:** Prepared according to a published procedure from 4-iodoanisole (0.5 mmol) and 4-methoxyphenylboronic acid.<sup>[7]</sup> The title compound was obtained as a white solid in 82% yield (88 mg).  $^1\text{H}$  NMR (600 MHz,  $\text{C}_6\text{D}_6$ )  $\delta$  7.43 (d,  $J = 8.7$  Hz, 4H), 6.87 (d,  $J = 8.7$  Hz, 4H), 3.35 (s, 6H).  $^{13}\text{C}$  NMR (151 MHz,  $\text{C}_6\text{D}_6$ )  $\delta$  159.4, 134.0, 128.2, 114.6, 54.9. MS (70eV, EI):  $m/z$  (%): 214 (100), 199 (90), 171 (33), 156 (13), 128 (25).

#### 4. Crystallographic Data for [(SIPr)Ni( $\mu$ -I)]<sub>2</sub> (3) and [(SIPr)Ni( $\mu$ -SeCF<sub>3</sub>)]<sub>2</sub> (4)

|                                                                 | [(SIPr)Ni( $\mu$ -I)] <sub>2</sub>                                            | [(SIPr)Ni( $\mu$ -SeCF <sub>3</sub> )] <sub>2</sub> ·Et <sub>2</sub> O                          |
|-----------------------------------------------------------------|-------------------------------------------------------------------------------|-------------------------------------------------------------------------------------------------|
| Chemical formula                                                | C <sub>54</sub> H <sub>76</sub> I <sub>2</sub> N <sub>4</sub> Ni <sub>2</sub> | C <sub>60</sub> H <sub>84</sub> F <sub>6</sub> N <sub>4</sub> Ni <sub>2</sub> O Se <sub>2</sub> |
| <i>M<sub>r</sub></i> (g/mol)                                    | 1152.40                                                                       | 1266.65                                                                                         |
| Crystal description                                             | orange block                                                                  | brown block                                                                                     |
| Crystal size (mm <sup>3</sup> )                                 | 0.28x0.26x0.26                                                                | 0.30x0.24x0.20                                                                                  |
| Crystal system, space group                                     | monoclinic, I 2/a                                                             | Triclinic, <i>P</i> $\bar{1}$                                                                   |
| <i>T</i> (K)                                                    | 100(2)                                                                        | 100(2)                                                                                          |
| <i>a</i> , <i>b</i> , <i>c</i> (Å)                              | 19.7206(10)<br>12.3114(6)<br>23.0533(16)                                      | 11.792(5)<br>11.948(5)<br>22.207(8)                                                             |
| $\alpha$ , $\beta$ , $\gamma$ (°)                               | 90<br>111.0560(10)<br>90                                                      | 98.093(6)<br>95.887(6)<br>95.172(6)                                                             |
| <i>V</i> (Å <sup>3</sup> )                                      | 5223.4(5)                                                                     | 3064(2)                                                                                         |
| <i>Z</i>                                                        | 4                                                                             | 2                                                                                               |
| $\mu$ (mm <sup>-1</sup> )                                       | 1.941                                                                         | 1.862                                                                                           |
| Total/unique reflections                                        | 36224, 6633                                                                   | 26059, 11413                                                                                    |
| <i>R</i> <sub>int</sub>                                         | 0.0354                                                                        | 0.0763                                                                                          |
| <i>R</i> ( <i>F</i> <sup>2</sup> > 2σ( <i>F</i> <sup>2</sup> )) | 0.0220                                                                        | 0.0563                                                                                          |
| <i>wR</i> ( <i>F</i> <sup>2</sup> )                             | 0.0528                                                                        | 0.1439                                                                                          |
| <i>GoF</i>                                                      | 1.029                                                                         | 1.020                                                                                           |
| No. of reflections                                              | 6633                                                                          | 11413                                                                                           |
| No. of parameters                                               | 288                                                                           | 694                                                                                             |
| No. of restraints                                               | 0                                                                             | 0                                                                                               |
| $\Delta\rho_{\max}$ , $\Delta\rho_{\min}$ (e Å <sup>-3</sup> )  | 0.805, -0.369                                                                 | 1.160, -1.126                                                                                   |
| CCDC Number                                                     | CCDC 1558598                                                                  | CCDC 1558599                                                                                    |

Crystal structure of  $[(\text{SIPr})\text{Ni}(\text{I})]_2$

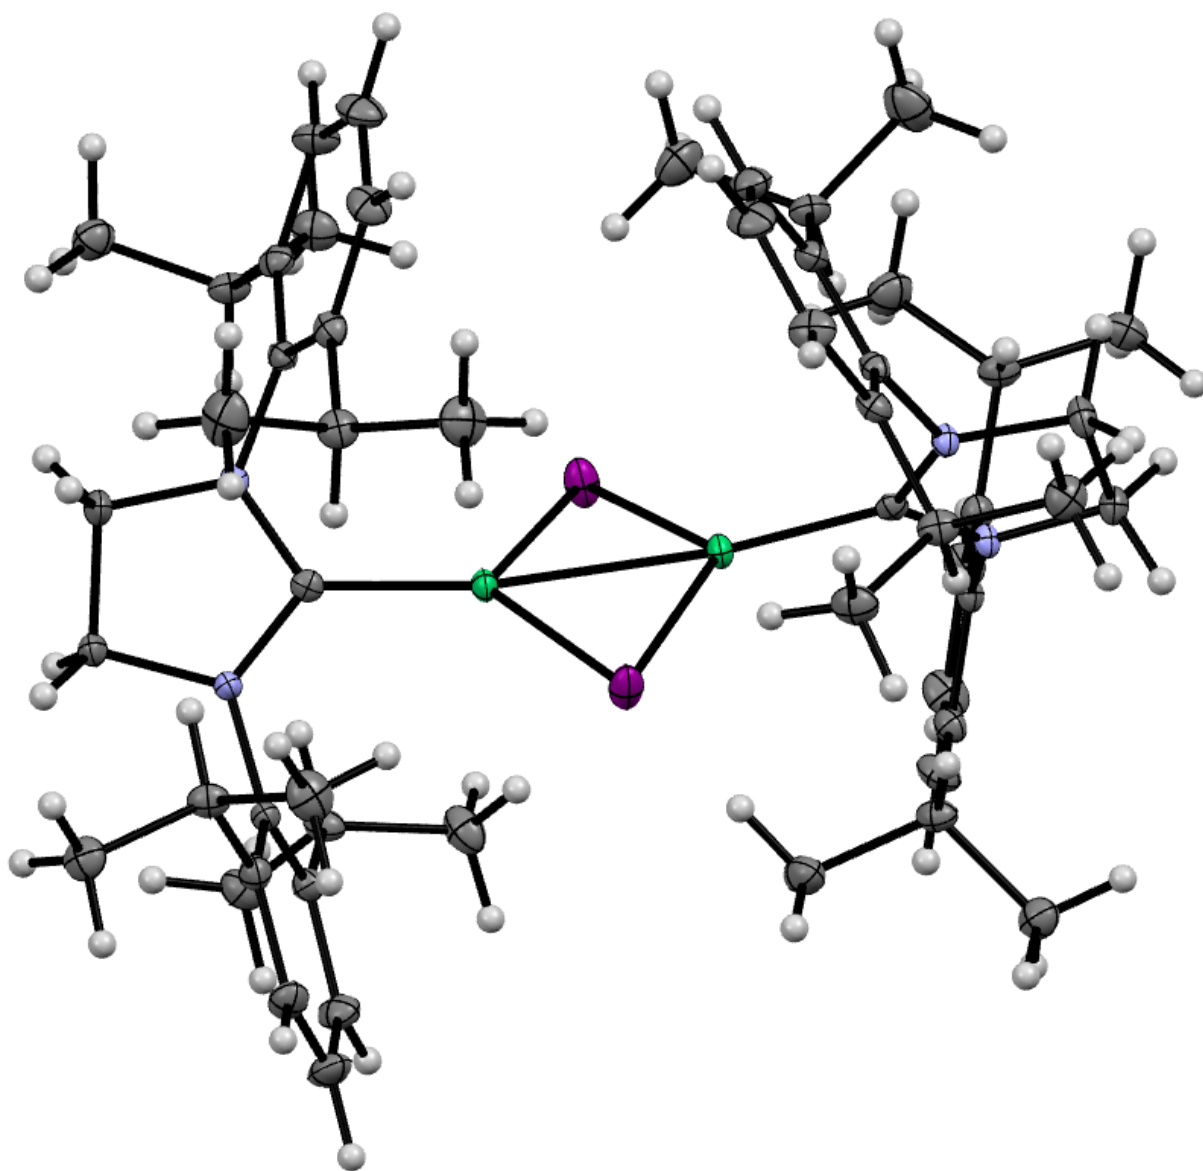

Crystal structure of  $[(\text{SIPr})\text{Ni}(\text{SeCF}_3)_2 \cdot \text{Et}_2\text{O}]$

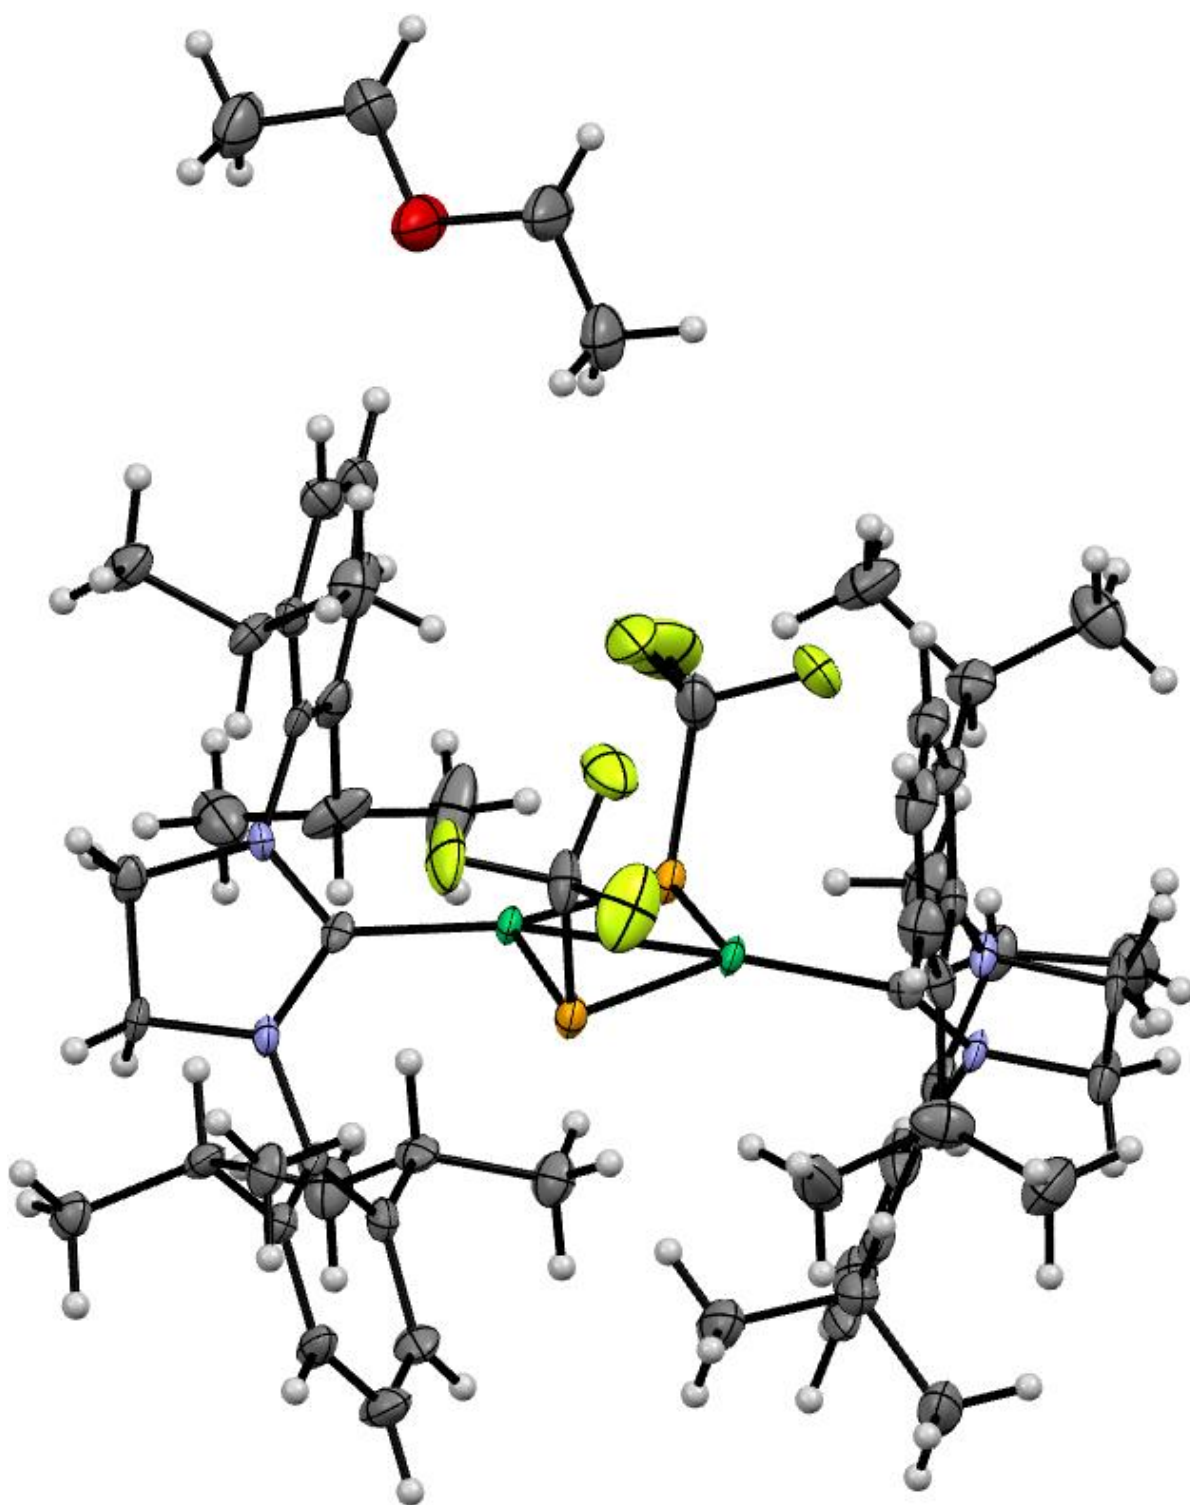



## 5. Computational details

### General Information

All calculations were performed with the Gaussian 09 program package.<sup>[8]</sup> Structural optimizations and frequency calculations were performed with B3LYP (and  $\omega$ B97XD) along with 6-31G(d) basis set on C, H, N, Se, Br, Cl and F atoms, and the effective core potential (ECP) SDD on Ni and I atoms. Single point energy calculations were performed with M06L, M06, PBE0-D3 and PBE0 functionals, and def2-TZVP basis set on all atoms. Solvent effects of benzene were taken into account using the CPCM solvation model. Frequency calculations were performed to confirm whether the structure is a minimum or a transition state. Intrinsic reaction coordinate (IRC) analysis was used to confirm that the obtained transition states connect the correct minima. All energies were corrected to 1M standard state with the addition of 1.89 kcal/mol to the energy of each species.<sup>[9]</sup> D3 corrections were applied using the original D3 damping functions proposed by Grimme and co-workers.<sup>[10]</sup>

### 5.1 Ni(0) pathway and its selectivity

**Table S1.** Selectivity of oxidative addition of Ar-X to  $[\text{Ni}^0]$ , relative to the barrier with PhI, as predicted by M06L, M06 and PBE0-D3. Calculated using CPCM (Benzene) DFT/def2-TZVP // B3LYP/6-31G(d) (SDD).

| Ph-X                | $\Delta\Delta G^\ddagger$ (vs PhI) |      |         |
|---------------------|------------------------------------|------|---------|
|                     | M06L                               | M06  | PBE0-D3 |
| PhBr                | 4.5                                | 5.0  | 4.9     |
| PhCl                | 5.0                                | 5.3  | 4.5     |
| PhSeCF <sub>3</sub> | -6.3                               | -4.0 | -6.6    |

The selectivity of oxidative addition was also analyzed based on structures optimized at the  $\omega$ B97XD/6-31G(d) (SDD) level of theory. As illustrated by Figure S3, the choice of optimization method however did not seem to affect the outcome, and PhSeCF<sub>3</sub> was still found to be more reactive than the aryl halides (as shown in Figure 3 in the manuscript, as well as in Table S1).

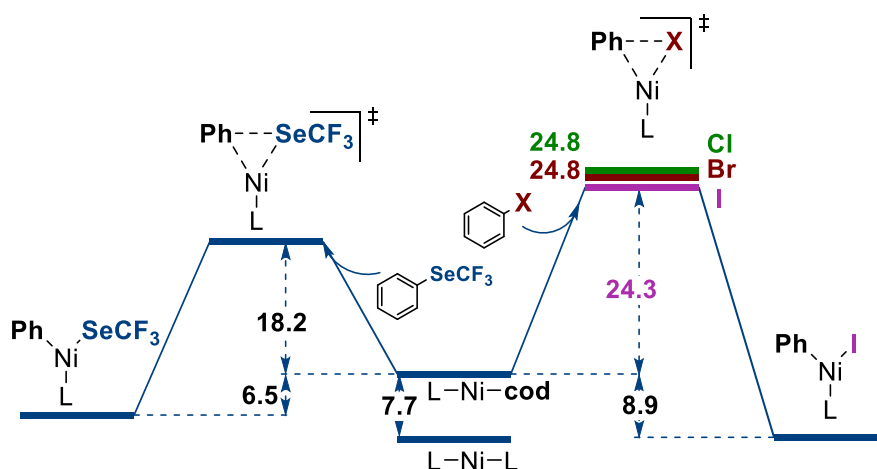

**Figure S3.**  $\text{Ni}^0/\text{Ni}^{\text{II}}$  mechanism for the trifluoromethylselenolation of aryl halides, calculated at CPCM (Benzene) M06L/def2-TZVP //  $\omega$ B97XD/6-31G(d) (SDD) level of theory.

## 5.2 DFT methods vs the electron structure of Ni(I) dimers

A number of DFT methods, such as the pure functional M06L, and also hybrid methods M06, PBE0-D3, and PBE0 were tested for their ability to reproduce the experimentally observed singlet closed shell state Ni( $\uparrow\downarrow$ )Ni of our prepared Ni(I) dimers **3** and **4** (Table S2). In agreement with our experimental data, the M06L method suggests the SeCF<sub>3</sub>-bridged dimer to be in the closed shell singlet states. The I-bridged dimer, however, is still predicted to be in the triplet state, by 2.6 kcal/mol. As expected, the introduction of Hartree-Fock exchange in case of hybrid methods leads to substantial favouring of the open shell triplet state, Ni( $\uparrow$ )Ni( $\uparrow$ ).<sup>[11]</sup>

**Table S2.** Comparison of DFT methods for the prediction of singlet-triplet gaps of SIPr-Ni(I) dimers. Calculated using CPCM (Benzene) DFT/def2-TZVP // B3LYP/6-31G(d) (SDD).

|  |  | $\Delta G (T - S)$ |       |         |       |
|--|--|--------------------|-------|---------|-------|
|  |  | M06L               | M06   | PBE0-D3 | PBE0  |
|  |  | 3.6                | -11.4 | -18.7   | -22.4 |
|  |  | -2.6               | -16.2 | -25.5   | -30.1 |

## 5.3 Oxidative addition with Ni(I) dimers

It has to be noted that while in this context pure DFT functionals would be able to more realistically describe the energy differences between singlet and triplet ground state structures, this trend might not hold true for transition states when spin-crossover processes are involved. To illustrate that we computed the absolute barriers of oxidative addition of iodobenzene to a mixed I-SeCF<sub>3</sub>-bridged dimer (in closed shell singlet state). As shown by Figure S4, the absolute barriers in the closed shell singlet state are relatively unaffected by the choice of the method. In triplet state, however, the barriers range from as low as 5.9 kcal/mol to as high as 28.7 kcal/mol. This suggests that in relative terms pure DFT methods may overestimate the barrier heights of processes where spin-crossover from closed to open shell would occur. Hybrid methods on the other hand may overestimate the stability of triplet state structures.

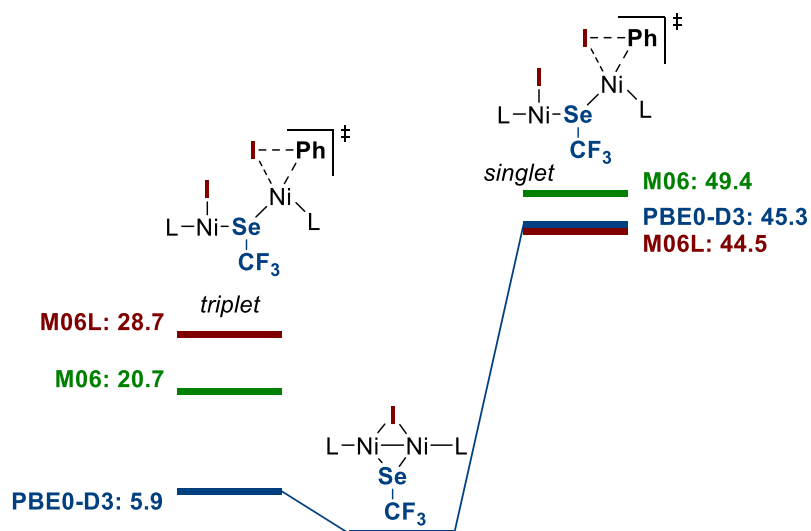

**Figure S4.** Comparison of triplet and singlet state oxidative addition transition states between PhI and the mixed I-SeCF<sub>3</sub> Ni(I) dimer **8**. Calculated using CPCM (Benzene) DFT/def2-TZVP // B3LYP/6-31G(d) (SDD).

To gain insights into the nature of the computed triplet state transition state we performed spin density analysis on it. As illustrated by Figure S5, this analysis indicates that both Ni centers bear a relatively equal degree of open shell character. This suggests that transition state to be of Ni<sup>I</sup>-Ni<sup>I</sup>, rather than of Ni<sup>II</sup>-Ni<sup>0</sup> type.

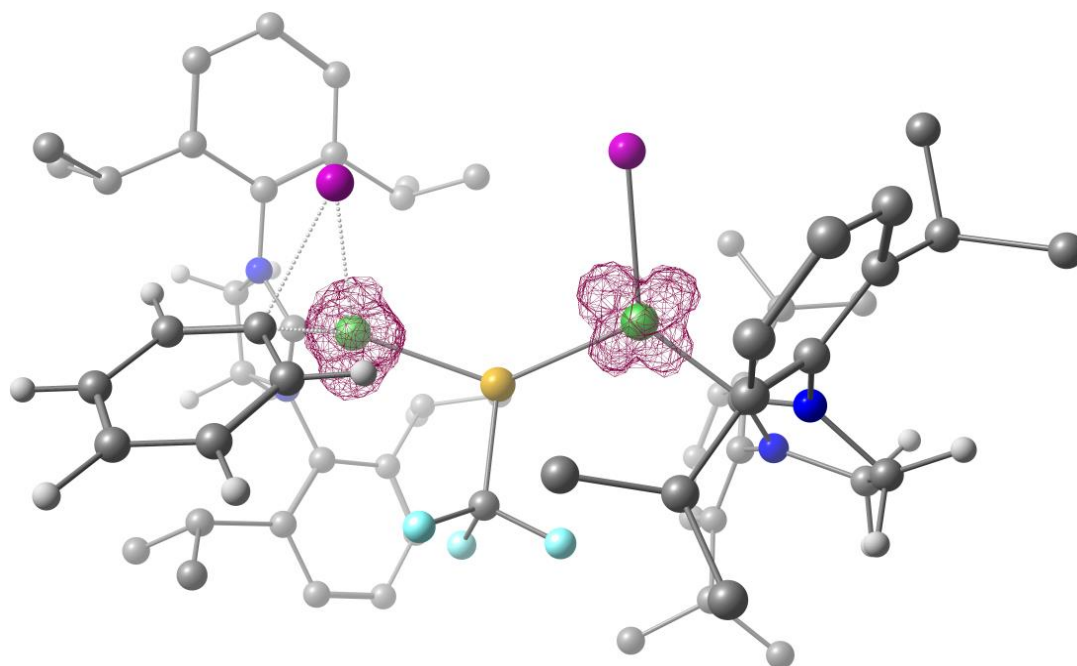

**Figure S5.** Spin density analysis of a triplet state oxidative addition transition state between PhI and the mixed I-SeCF<sub>3</sub> Ni(I) dimer **8**.

With all of the above in mind, the potential energy surface of the reaction can only be constructed in a qualitative manner, as the absolute energy values are highly affected by the different strengths and weaknesses of chosen computational methods to describe triplet or singlet states adequately. Despite that, the relative energies of transition states and intermediates, within one spin state are still comparable, regardless of the method. Two functionals, M06L and PBE0-D3 were used to calculate all of the intermediates in the dimeric pathway. Various structural isomers were considered for the intermediates and transition states (*i.e.* I-bridged or SeCF<sub>3</sub>-bridged), with only the lowest energy species reported below.

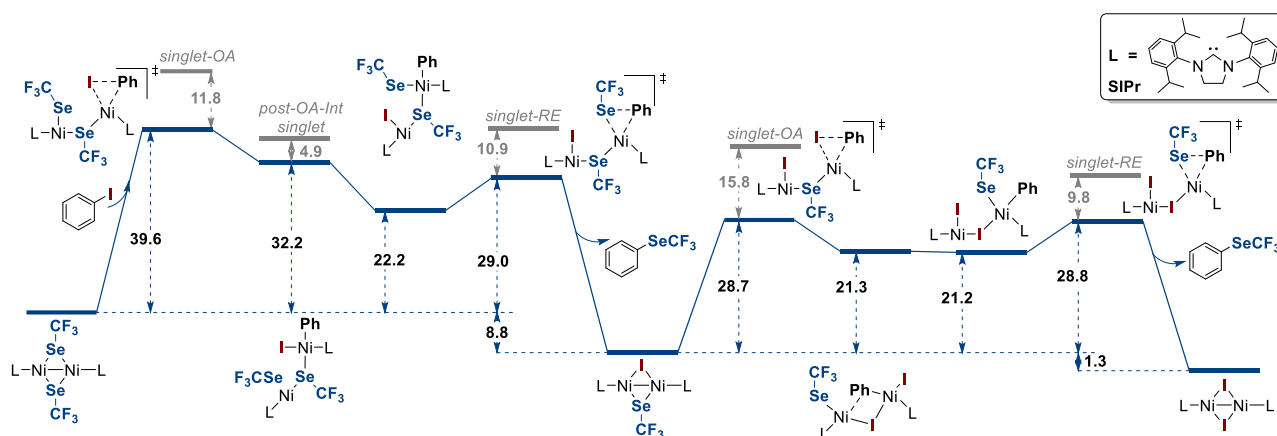

**Figure S6.** Potential energy surface of a dimeric pathway of trifluoromethylselenolation of iodobenzene, calculated at the CPCM (Benzene) M06L/def2-TZVP // B3LYP/6-31G(d) (SDD for Ni, I) level of theory.

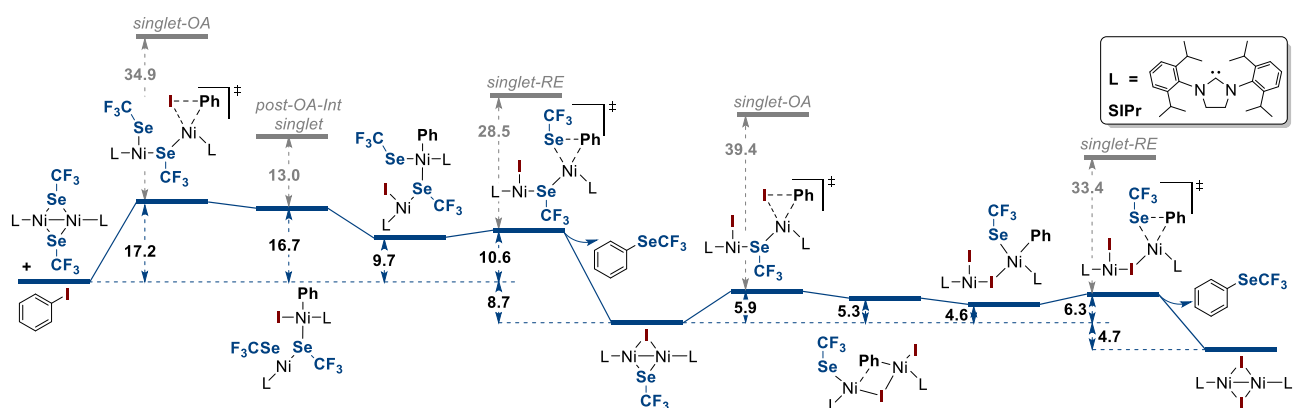

**Figure S7.** Potential energy surface of a dimeric pathway of trifluoromethylselenolation of iodobenzene, calculated at the CPCM (Benzene) PBE0-D3/def2-TZVP // B3LYP/6-31G(d) (SDD for Ni, I) level of theory.

**Table S3.** Selectivity of oxidative addition of Ar-X to mixed I-SeCF<sub>3</sub> Ni(I) dimer **8**, relative to the barrier with PhI. Calculated using CPCM (Benzene) DFT/def2-TZVP // B3LYP/6-31G(d) (SDD).

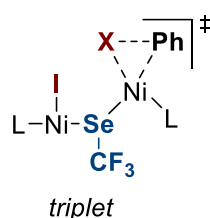

| Ph-X                | $\Delta\Delta G^\ddagger$ (vs PhI) |         |
|---------------------|------------------------------------|---------|
|                     | M06L                               | PBE0-D3 |
| PhBr                | 0.0                                | 1.6     |
| PhCl                | 3.1                                | 3.1     |
| PhSeCF <sub>3</sub> | 9.0                                | 13.5    |

In analogy to the more reactive (in terms of absolute barriers) mixed I-SeCF<sub>3</sub>-bridged Ni(I) dimer, the selectivity of oxidative addition was also computed for the bis-SeCF<sub>3</sub>-bridged Ni(I) dimer. The data, presented in Table S4 indicate similar reactivity trends.

**Table S4.** Selectivity of oxidative addition of Ar-X to the SCF<sub>3</sub>-bridged Ni(I) dimer **4**, relative to the barrier with PhI. Calculated using CPCM (Benzene) DFT/def2-TZVP // B3LYP/6-31G(d) (SDD).

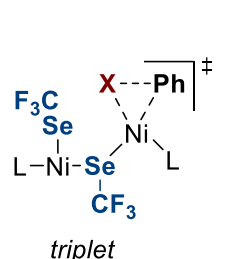

| Ph-X                | $\Delta\Delta G^\ddagger$ (vs PhI) |         |
|---------------------|------------------------------------|---------|
|                     | M06L                               | PBE0-D3 |
| PhBr                | 1.6                                | 2.1     |
| PhCl                | 5.2                                | 8.2     |
| PhSeCF <sub>3</sub> | 4.4                                | 7.8     |





|   |                |                 |                 |   |                 |                 |                 |
|---|----------------|-----------------|-----------------|---|-----------------|-----------------|-----------------|
| C | 5.070238000000 | 0.394856000000  | -0.618282000000 | H | 4.195609000000  | -2.922228000000 | 1.917326000000  |
| H | 6.110006000000 | 0.492991000000  | -0.917075000000 | C | 1.980692000000  | 2.612997000000  | -0.326429000000 |
| C | 4.238670000000 | 1.505699000000  | -0.631427000000 | H | 1.066259000000  | 2.383321000000  | 0.230310000000  |
| H | 4.634845000000 | 2.465384000000  | -0.950986000000 | C | 1.568483000000  | 2.845757000000  | -1.786944000000 |
| C | 2.899759000000 | 1.405205000000  | -0.245360000000 | H | 2.445849000000  | 3.063481000000  | -2.407851000000 |
| C | 2.650468000000 | -2.356373000000 | 0.477406000000  | H | 0.875644000000  | 3.691491000000  | -1.863997000000 |
| H | 1.865042000000 | -2.207502000000 | 1.227163000000  | H | 1.074940000000  | 1.952939000000  | -2.183249000000 |
| C | 1.970471000000 | -2.934468000000 | -0.773696000000 | C | 2.590657000000  | 3.874278000000  | 0.294747000000  |
| H | 1.226553000000 | -2.235219000000 | -1.167510000000 | H | 2.914563000000  | 3.695136000000  | 1.325739000000  |
| H | 1.470492000000 | -3.882257000000 | -0.539368000000 | H | 1.850619000000  | 4.682321000000  | 0.302823000000  |
| H | 2.711984000000 | -3.123003000000 | -1.558990000000 | H | 3.456742000000  | 4.232794000000  | -0.272969000000 |
| C | 3.659150000000 | -3.348038000000 | 1.062487000000  | H | 1.339535000000  | -0.517161000000 | 2.628066000000  |
| H | 4.399586000000 | -3.661914000000 | 0.317839000000  | H | -0.953187000000 | -1.191068000000 | 2.329592000000  |
| H | 3.139583000000 | -4.251465000000 | 1.399538000000  |   |                 |                 |                 |

|                                              |                             |
|----------------------------------------------|-----------------------------|
| Zero-point correction=                       | 0.603082 (Hartree/Particle) |
| Thermal correction to Energy=                | 0.632860                    |
| Thermal correction to Enthalpy=              | 0.633804                    |
| Thermal correction to Gibbs Free Energy=     | 0.543675                    |
| Sum of electronic and zero-point Energies=   | -1160.292740                |
| Sum of electronic and thermal Energies=      | -1160.262963                |
| Sum of electronic and thermal Enthalpies=    | -1160.262019                |
| Sum of electronic and thermal Free Energies= | -1160.352147                |
| CPCM (Benzene) PBE0-D3/def2TZVP E =          | -1160.29644025              |
| CPCM (Benzene) M06L/def2TZVP E =             | -1161.49059718              |

### 1,5-cyclooctadiene (cod)

|   |                 |                 |                 |
|---|-----------------|-----------------|-----------------|
| C | -1.083205000000 | -1.107768000000 | 0.665235000000  |
| C | 1.923352000000  | 0.011316000000  | -0.024461000000 |
| C | 0.007978000000  | 1.704749000000  | -0.218086000000 |
| C | -1.923415000000 | -0.010876000000 | -0.024290000000 |
| C | -1.215227000000 | 1.236097000000  | -0.495433000000 |
| H | -1.771795000000 | -1.910180000000 | 0.958605000000  |
| H | -2.741047000000 | 0.283487000000  | 0.653768000000  |
| H | -0.666355000000 | -0.724888000000 | 1.600205000000  |
| H | 0.291717000000  | 2.634824000000  | -0.711800000000 |
| H | -2.425665000000 | -0.455621000000 | -0.896380000000 |
| C | -0.007776000000 | -1.704827000000 | -0.218204000000 |
| H | -0.290785000000 | -2.635346000000 | -0.711489000000 |
| C | 1.215478000000  | -1.236011000000 | -0.495150000000 |
| H | 1.822532000000  | -1.841673000000 | -1.170423000000 |
| H | 2.424611000000  | 0.456531000000  | -0.896905000000 |
| H | 2.741756000000  | -0.282836000000 | 0.652758000000  |
| H | -1.821805000000 | 1.841441000000  | -1.171403000000 |
| C | 1.082851000000  | 1.107462000000  | 0.665827000000  |
| H | 0.665549000000  | 0.723609000000  | 1.600171000000  |
| H | 1.771066000000  | 1.909803000000  | 0.960263000000  |

|                                              |                             |
|----------------------------------------------|-----------------------------|
| Zero-point correction=                       | 0.181195 (Hartree/Particle) |
| Thermal correction to Energy=                | 0.188619                    |
| Thermal correction to Enthalpy=              | 0.189563                    |
| Thermal correction to Gibbs Free Energy=     | 0.149669                    |
| Sum of electronic and zero-point Energies=   | -311.843270                 |
| Sum of electronic and thermal Energies=      | -311.835846                 |
| Sum of electronic and thermal Enthalpies=    | -311.834902                 |
| Sum of electronic and thermal Free Energies= | -311.874796                 |
| CPCM (Benzene) PBE0-D3/def2TZVP E =          | -311.764136766              |
| CPCM (Benzene) M06L/def2TZVP E =             | -312.092526515              |
| CPCM (Benzene) M06/def2TZVP E =              | -311.88505561               |

### PhSeCF<sub>3</sub>

|    |                 |                 |                 |
|----|-----------------|-----------------|-----------------|
| C  | 1.585587000000  | -0.166584000000 | 1.213092000000  |
| C  | 2.896718000000  | 0.312311000000  | 1.209954000000  |
| C  | 3.552000000000  | 0.551261000000  | -0.000067000000 |
| C  | 2.896741000000  | 0.311938000000  | -1.210026000000 |
| C  | 1.585609000000  | -0.166956000000 | -1.213041000000 |
| C  | 0.929822000000  | -0.402109000000 | 0.000055000000  |
| H  | 1.069711000000  | -0.353501000000 | 2.149120000000  |
| H  | 3.404425000000  | 0.497972000000  | 2.152439000000  |
| H  | 4.573304000000  | 0.922269000000  | -0.000115000000 |
| H  | 3.404465000000  | 0.497308000000  | -2.152560000000 |
| H  | 1.069751000000  | -0.354161000000 | -2.149020000000 |
| Se | -0.871642000000 | -1.093380000000 | 0.000137000000  |
| C  | -1.764462000000 | 0.666811000000  | -0.000088000000 |
| F  | -1.452422000000 | 1.399541000000  | 1.081275000000  |
| F  | -3.092792000000 | 0.459486000000  | -0.000114000000 |
| F  | -1.452334000000 | 1.399305000000  | -1.081584000000 |



Zero-point correction= 0.105525 (Hartree/Particle)  
 Thermal correction to Energy= 0.115597  
 Thermal correction to Enthalpy= 0.116541  
 Thermal correction to Gibbs Free Energy= 0.066628  
 Sum of electronic and zero-point Energies= -2968.081121  
 Sum of electronic and thermal Energies= -2968.071049  
 Sum of electronic and thermal Enthalpies= -2968.070105  
 Sum of electronic and thermal Free Energies= -2968.120018  
 CPCM (Benzene) PBE0-D3/def2TZVP E = -2970.18846689  
 CPCM (Benzene) M06L/def2TZVP E = -2970.89831173  
 CPCM (Benzene) M06/def2TZVP E = -2970.68552777

## PhI

C 1.267766000000 -1.216253000000 -0.000001000000  
 C 2.665372000000 -1.207349000000 -0.000002000000  
 C 3.365511000000 0.000001000000 -0.000003000000  
 C 2.665364000000 1.207353000000 -0.000002000000  
 C 1.267764000000 1.216252000000 -0.000001000000  
 C 0.586989000000 -0.000004000000 0.000000000000  
 H 0.726135000000 -2.155854000000 -0.000001000000  
 H 3.202585000000 -2.151943000000 -0.000003000000  
 H 4.451780000000 0.000007000000 -0.000004000000  
 H 3.202581000000 2.151946000000 -0.000002000000  
 H 0.726123000000 2.155847000000 -0.000001000000  
 I -1.570223000000 0.000000000000 0.000001000000

Zero-point correction= 0.090272 (Hartree/Particle)  
 Thermal correction to Energy= 0.096172  
 Thermal correction to Enthalpy= 0.097116  
 Thermal correction to Gibbs Free Energy= 0.058488  
 Sum of electronic and zero-point Energies= -242.963140  
 Sum of electronic and thermal Energies= -242.957240  
 Sum of electronic and thermal Enthalpies= -242.956295  
 Sum of electronic and thermal Free Energies= -242.994923  
 CPCM (Benzene) PBE0-D3/def2TZVP E = -529.172397515  
 CPCM (Benzene) M06L/def2TZVP E = -529.569787555  
 CPCM (Benzene) M06/def2TZVP E = -529.3083291

## PhBr

C 0.000000000000 0.000000000000 -2.882060000000  
 C 0.000000000000 1.207928000000 -2.181629000000  
 C 0.000000000000 -1.207928000000 -2.181629000000  
 H 0.000000000000 2.152195000000 -2.719225000000  
 H 0.000000000000 -2.152195000000 -2.719225000000  
 C 0.000000000000 1.215909000000 -0.785115000000  
 C 0.000000000000 -1.215909000000 -0.785115000000  
 H 0.000000000000 2.150008000000 -0.234210000000  
 H 0.000000000000 -2.150008000000 -0.234210000000  
 C 0.000000000000 0.000000000000 -0.103074000000  
 H 0.000000000000 0.000000000000 -3.968276000000  
 Br 0.000000000000 0.000000000000 1.811054000000

Zero-point correction= 0.090894 (Hartree/Particle)  
 Thermal correction to Energy= 0.096582  
 Thermal correction to Enthalpy= 0.097526  
 Thermal correction to Gibbs Free Energy= 0.060679  
 Sum of electronic and zero-point Energies= -2802.956583  
 Sum of electronic and thermal Energies= -2802.950895  
 Sum of electronic and thermal Enthalpies= -2802.949951  
 Sum of electronic and thermal Free Energies= -2802.986797  
 CPCM (Benzene) PBE0-D3/def2TZVP E = -2805.31268014  
 CPCM (Benzene) M06L/def2TZVP E = -2805.7574672  
 CPCM (Benzene) M06/def2TZVP E = -2805.60791816

## PhCl

|    |                |                 |                 |
|----|----------------|-----------------|-----------------|
| C  | 0.000000000000 | 0.000000000000  | -2.275083000000 |
| C  | 0.000000000000 | 1.207858000000  | -1.574512000000 |
| C  | 0.000000000000 | -1.207858000000 | -1.574512000000 |
| H  | 0.000000000000 | 2.151777000000  | -2.112625000000 |
| H  | 0.000000000000 | -2.151777000000 | -2.112625000000 |
| C  | 0.000000000000 | 1.216367000000  | -0.178285000000 |
| C  | 0.000000000000 | -1.216367000000 | -0.178285000000 |
| H  | 0.000000000000 | 2.149638000000  | 0.374753000000  |
| H  | 0.000000000000 | -2.149638000000 | 0.374753000000  |
| C  | 0.000000000000 | 0.000000000000  | 0.504171000000  |
| H  | 0.000000000000 | 0.000000000000  | -3.361260000000 |
| Cl | 0.000000000000 | 0.000000000000  | 2.264473000000  |

|                                              |                             |
|----------------------------------------------|-----------------------------|
| Zero-point correction=                       | 0.091242 (Hartree/Particle) |
| Thermal correction to Energy=                | 0.096738                    |
| Thermal correction to Enthalpy=              | 0.097682                    |
| Thermal correction to Gibbs Free Energy=     | 0.062115                    |
| Sum of electronic and zero-point Energies=   | -691.745505                 |
| Sum of electronic and thermal Energies=      | -691.740009                 |
| Sum of electronic and thermal Enthalpies=    | -691.739065                 |
| Sum of electronic and thermal Free Energies= | -691.774632                 |
| CPCM (Benzene) PBE0-D3/def2TZVP E =          | -691.518328308              |
| CPCM (Benzene) M06L/def2TZVP E =             | -691.903231885              |
| CPCM (Benzene) M06/def2TZVP E =              | -691.737090695              |

## TS-OA-Ni(0)-PhSeCF<sub>3</sub>

|    |                 |                 |                 |    |                 |                 |                 |
|----|-----------------|-----------------|-----------------|----|-----------------|-----------------|-----------------|
| Ni | -0.271785000000 | 0.585478000000  | -0.281420000000 | C  | 1.967183000000  | 0.509280000000  | -3.802033000000 |
| C  | 0.346197000000  | -1.158583000000 | -0.117234000000 | H  | 1.365188000000  | 1.192587000000  | -3.195201000000 |
| C  | 1.723777000000  | -3.081221000000 | -0.374055000000 | H  | 2.830793000000  | 1.062955000000  | -4.189771000000 |
| C  | 0.323326000000  | -3.530773000000 | 0.069552000000  | H  | 1.362906000000  | 0.196947000000  | -4.662147000000 |
| N  | -0.442799000000 | -2.272453000000 | 0.005708000000  | C  | 3.208284000000  | -1.002788000000 | 2.095318000000  |
| N  | 1.624777000000  | -1.613358000000 | -0.277561000000 | H  | 2.274327000000  | -1.565830000000 | 2.009465000000  |
| H  | 0.320662000000  | -3.933750000000 | 1.091772000000  | C  | 4.289086000000  | -1.966248000000 | 2.626460000000  |
| H  | 2.520376000000  | -3.465175000000 | 0.271439000000  | H  | 4.459931000000  | -2.801065000000 | 1.936601000000  |
| C  | -1.827642000000 | -2.230956000000 | 0.389258000000  | H  | 5.248151000000  | -1.453481000000 | 2.766442000000  |
| C  | -2.844629000000 | -2.390448000000 | -0.581118000000 | H  | 3.989848000000  | -2.381671000000 | 3.596369000000  |
| C  | -2.146317000000 | -2.060120000000 | 1.759847000000  | C  | 2.953376000000  | 0.141343000000  | 3.093955000000  |
| C  | -4.177174000000 | -2.325175000000 | -0.144495000000 | H  | 2.157013000000  | 0.802978000000  | 2.741469000000  |
| C  | -3.493195000000 | -2.014817000000 | 2.136742000000  | H  | 2.657870000000  | -0.265366000000 | 4.069119000000  |
| C  | -4.506693000000 | -2.136679000000 | 1.192531000000  | H  | 3.853930000000  | 0.748073000000  | 3.249090000000  |
| H  | -4.971536000000 | -2.428016000000 | -0.880303000000 | C  | -1.078812000000 | -1.957451000000 | 2.846648000000  |
| H  | -3.749817000000 | -1.878830000000 | 3.183772000000  | H  | -0.100293000000 | -1.934534000000 | 2.360615000000  |
| H  | -5.549099000000 | -2.087984000000 | 1.496893000000  | C  | -1.114421000000 | -3.188388000000 | 3.776165000000  |
| C  | 2.786968000000  | -0.786656000000 | -0.435877000000 | H  | -0.305852000000 | -3.134676000000 | 4.515323000000  |
| C  | 3.563571000000  | -0.483334000000 | 0.705542000000  | H  | -2.062548000000 | -3.246829000000 | 4.323763000000  |
| C  | 3.168572000000  | -0.342209000000 | -1.722162000000 | H  | -1.001238000000 | -4.123125000000 | 3.214480000000  |
| C  | 4.708294000000  | 0.305653000000  | 0.539424000000  | C  | -1.196667000000 | -0.655076000000 | 3.659482000000  |
| C  | 4.322494000000  | 0.443636000000  | -1.834265000000 | H  | -0.387967000000 | -0.596083000000 | 4.398091000000  |
| C  | 5.085110000000  | 0.771723000000  | -0.716685000000 | H  | -1.124078000000 | 0.219623000000  | 3.006605000000  |
| H  | 5.313819000000  | 0.554528000000  | 1.406838000000  | H  | -2.146704000000 | -0.600878000000 | 4.204596000000  |
| H  | 4.630774000000  | 0.799106000000  | -2.813679000000 | C  | -0.154187000000 | 2.801693000000  | 0.588406000000  |
| H  | 5.977360000000  | 1.383008000000  | -0.826567000000 | C  | -1.010226000000 | 2.841814000000  | 1.702452000000  |
| C  | -2.663802000000 | -2.700907000000 | -2.073531000000 | C  | 1.185923000000  | 3.210124000000  | 0.728218000000  |
| H  | -3.564747000000 | -2.291255000000 | -2.549779000000 | C  | -0.516527000000 | 3.262995000000  | 2.939335000000  |
| C  | -2.708413000000 | -4.226083000000 | -2.316611000000 | H  | -2.047165000000 | 2.543232000000  | 1.613278000000  |
| H  | -2.701593000000 | -4.442131000000 | -3.392022000000 | C  | 1.664604000000  | 3.618307000000  | 1.970380000000  |
| H  | -1.840913000000 | -4.728058000000 | -1.871712000000 | H  | 1.847574000000  | 3.201363000000  | -0.132473000000 |
| H  | -3.609275000000 | -4.674536000000 | -1.883841000000 | C  | 0.815976000000  | 3.652415000000  | 3.082134000000  |
| C  | -1.475673000000 | -2.068488000000 | -2.814534000000 | H  | -1.185940000000 | 3.283429000000  | 3.795588000000  |
| H  | -0.532373000000 | -2.576767000000 | -2.594801000000 | H  | 2.704152000000  | 3.920519000000  | 2.066310000000  |
| H  | -1.647304000000 | -2.148452000000 | -3.895441000000 | H  | 1.190132000000  | 3.983079000000  | 4.046864000000  |
| H  | -1.351053000000 | -1.012017000000 | -2.558273000000 | H  | 1.949472000000  | -3.384696000000 | -1.405413000000 |
| C  | 2.394440000000  | -0.720792000000 | -2.980340000000 | H  | -0.105570000000 | -4.289617000000 | -0.591162000000 |
| H  | 1.477264000000  | -1.226086000000 | -2.667405000000 | Se | -0.790914000000 | 2.494624000000  | -1.264031000000 |
| C  | 3.205702000000  | -1.702736000000 | -3.851349000000 | C  | -2.737195000000 | 2.986002000000  | -1.022712000000 |
| H  | 4.129022000000  | -1.238727000000 | -4.218769000000 | F  | -2.900173000000 | 4.208589000000  | -0.492455000000 |
| H  | 3.489944000000  | -2.600587000000 | -3.290083000000 | F  | -3.420739000000 | 2.115433000000  | -0.254941000000 |
| H  | 2.619701000000  | -2.017611000000 | -4.723325000000 | F  | -3.293074000000 | 2.979995000000  | -2.242757000000 |

|                                            |                             |
|--------------------------------------------|-----------------------------|
| Zero-point correction=                     | 0.702165 (Hartree/Particle) |
| Thermal correction to Energy=              | 0.746368                    |
| Thermal correction to Enthalpy=            | 0.747312                    |
| Thermal correction to Gibbs Free Energy=   | 0.620590                    |
| Sum of electronic and zero-point Energies= | -4299.678672                |
| Sum of electronic and thermal Energies=    | -4299.634469                |

Sum of electronic and thermal Enthalpies= -4299.633525  
 Sum of electronic and thermal Free Energies= -4299.760247  
 CPCM (Benzene) PBE0-D3/def2TZVP E = -5638.62463139  
 CPCM (Benzene) M06L/def2TZVP E = -5640.72932305  
 CPCM (Benzene) M06/def2TZVP E = -5639.77364403

### SIPr-Ni-Ph-SeCF<sub>3</sub>

|    |                |                |                |    |                |                |                |
|----|----------------|----------------|----------------|----|----------------|----------------|----------------|
| Ni | -0.46483000000 | 0.56527600000  | 0.46138100000  | H  | -0.67513200000 | 0.88595100000  | -4.43341500000 |
| N  | -0.37593900000 | -2.07101300000 | -0.69582000000 | H  | -2.15765800000 | -1.81178300000 | -4.98646700000 |
| N  | 1.66261200000  | -1.56660200000 | -0.10445800000 | H  | -0.42650000000 | -1.51010500000 | -5.20732800000 |
| C  | -2.71763200000 | -2.41562000000 | -0.04637300000 | H  | -0.97578600000 | -2.85688000000 | -4.18892600000 |
| C  | -4.07806000000 | -2.29522400000 | -0.35524800000 | H  | 0.40438700000  | -3.33123600000 | -2.21300200000 |
| C  | -4.49495900000 | -1.71575900000 | -1.54980200000 | H  | 2.58417600000  | -3.12013500000 | -1.23774500000 |
| C  | -3.55435800000 | -1.24877900000 | -2.46424900000 | H  | 5.67814500000  | 0.66661500000  | -0.34548400000 |
| C  | -2.18077100000 | -1.34671100000 | -2.20975000000 | H  | 5.86088200000  | 0.81149800000  | -2.11197500000 |
| C  | -1.77917500000 | -1.92849900000 | -0.98450200000 | H  | 4.10735000000  | -0.16938300000 | 3.54700600000  |
| C  | -2.30127800000 | -3.06911200000 | 1.26849000000  | H  | 2.74730100000  | -0.84082000000 | -2.13344400000 |
| C  | -2.89817400000 | -2.34182300000 | 2.48951900000  | H  | 3.82011500000  | 0.77209400000  | -3.63794800000 |
| C  | -2.66762600000 | -4.56718500000 | 1.28915300000  | H  | 4.90754600000  | 1.32199400000  | -2.35789000000 |
| C  | -1.18493700000 | -0.86922200000 | -3.26329600000 | H  | 3.15973800000  | 1.60385700000  | -2.21604900000 |
| C  | -1.44085700000 | 0.58253900000  | -3.70990500000 | H  | 4.67730900000  | -2.46654300000 | -1.91167100000 |
| C  | -1.18544900000 | -1.82039400000 | -4.47952400000 | H  | 4.70194600000  | -1.59963800000 | -3.46123500000 |
| C  | 0.38540000000  | -3.26484800000 | -1.11847600000 | H  | 5.80597400000  | -1.13110100000 | -2.15840500000 |
| C  | 1.77274200000  | -2.98523800000 | -0.51891000000 | H  | 1.04976900000  | -1.89967500000 | 2.23224200000  |
| C  | 0.39646000000  | -1.10242500000 | -0.15649900000 | H  | 0.76215300000  | 0.33082200000  | 3.28577200000  |
| C  | 2.78647600000  | -0.90308100000 | 0.50349100000  | H  | 0.48965500000  | -0.98319800000 | 4.44584500000  |
| C  | 3.79262600000  | -0.36897800000 | -0.33378900000 | C  | 2.48866300000  | -2.69426800000 | 3.60394700000  |
| C  | 4.89414300000  | 0.24319700000  | 0.27539000000  | H  | 3.29794600000  | -2.36535800000 | 4.26629700000  |
| C  | 5.00670000000  | 0.32447800000  | 1.66044300000  | H  | 1.73160200000  | -3.18907300000 | 4.22409900000  |
| C  | 4.00887500000  | -0.22498700000 | 2.46653100000  | H  | 2.90728600000  | -3.43940800000 | 2.91709600000  |
| C  | 2.88960800000  | -0.85792700000 | 1.91182600000  | C  | -1.61482100000 | 1.74303200000  | 1.29191500000  |
| C  | 3.74025800000  | -0.47107200000 | -1.85670100000 | C  | -2.96678600000 | 1.54873000000  | 0.94237300000  |
| C  | 3.91822700000  | 0.89184500000  | -2.55228100000 | C  | -1.32426200000 | 2.45040300000  | 2.47357100000  |
| C  | 4.78898300000  | -1.47889900000 | -2.37481100000 | C  | -3.99441900000 | 1.98133400000  | 1.78899900000  |
| C  | 1.86734200000  | -1.50464800000 | 2.84276800000  | C  | -2.35017500000 | 2.88601500000  | 3.31509000000  |
| C  | 1.24575700000  | -0.49148200000 | 3.82208000000  | C  | -3.68638000000 | 2.64823400000  | 2.97629900000  |
| H  | -4.81964800000 | -2.65675300000 | 0.35138400000  | H  | -3.22556100000 | 1.05884900000  | 0.00489200000  |
| H  | -5.55562900000 | -1.62891000000 | -1.77040500000 | H  | -0.29024500000 | 2.66325400000  | 2.73310800000  |
| H  | -3.89169000000 | -0.80232000000 | -3.39491000000 | H  | -5.03287100000 | 1.81389500000  | 1.51069100000  |
| H  | -1.21186000000 | -2.99485000000 | 1.34889700000  | H  | -2.10982500000 | 3.42024300000  | 4.23192900000  |
| H  | -2.65518500000 | -1.27430500000 | 2.47966200000  | H  | -4.48381700000 | 2.99840200000  | 3.62742600000  |
| H  | -2.50786500000 | -2.77711600000 | 3.41715800000  | Se | 0.82060500000  | 2.11581000000  | -0.55099700000 |
| H  | -3.99027600000 | -2.43274600000 | 2.51697200000  | H  | 1.99982800000  | -0.06235300000 | 4.49213200000  |
| H  | -2.21736800000 | -5.10534200000 | 0.44663900000  | C  | -0.26063200000 | 3.72225600000  | -0.76980000000 |
| H  | -2.31905600000 | -5.03483800000 | 2.21762200000  | F  | -1.46179600000 | 3.45618700000  | -1.44412000000 |
| H  | -3.75271800000 | -4.71110700000 | 1.23012700000  | F  | -0.50699700000 | 4.46724800000  | 0.21796800000  |
| H  | -0.18490600000 | -0.89096200000 | -2.81989800000 | F  | 0.41620800000  | 4.51205900000  | -1.74438200000 |
| H  | -1.39608300000 | 1.27695100000  | -2.86694100000 | H  | -0.07558300000 | -4.17729900000 | -0.72877100000 |
| H  | -2.41563100000 | 0.69072200000  | -4.20032500000 | H  | 1.98613500000  | -3.60863100000 | 0.35853200000  |

Zero-point correction= 0.703148 (Hartree/Particle)  
 Thermal correction to Energy= 0.747871  
 Thermal correction to Enthalpy= 0.748815  
 Thermal correction to Gibbs Free Energy= 0.620407  
 Sum of electronic and zero-point Energies= -4299.721182  
 Sum of electronic and thermal Energies= -4299.676459  
 Sum of electronic and thermal Enthalpies= -4299.675515  
 Sum of electronic and thermal Free Energies= -4299.803923  
 CPCM (Benzene) PBE0-D3/def2TZVP E = -5638.66904741  
 CPCM (Benzene) M06L/def2TZVP E = -5640.76230228  
 CPCM (Benzene) M06/def2TZVP E = -5639.80366804

### TS-OA-Ni(0)-PhI

|    |               |                |                |   |                |                |                |
|----|---------------|----------------|----------------|---|----------------|----------------|----------------|
| Ni | 0.11149800000 | -0.78771300000 | -0.48361300000 | H | 5.89365800000  | -2.45082800000 | 0.96224700000  |
| C  | 0.71738800000 | 0.84141100000  | 0.06985300000  | C | -1.39593300000 | 2.17171600000  | 0.03303100000  |
| C  | 0.86481600000 | 3.17546900000  | 0.50955400000  | C | -2.25299900000 | 2.19140400000  | 1.15669900000  |
| C  | 2.21632000000 | 2.52490100000  | 0.83058300000  | C | -1.89279800000 | 2.38963500000  | -1.27215000000 |
| N  | 2.03302400000 | 1.15693000000  | 0.31166000000  | C | -3.61951600000 | 2.41203800000  | 0.94666700000  |
| N  | 0.01262700000 | 2.00202000000  | 0.24807500000  | C | -3.26843400000 | 2.60254700000  | -1.42866100000 |
| H  | 2.41798800000 | 2.50241900000  | 1.91111400000  | C | -4.12737000000 | 2.61455600000  | -0.33326900000 |
| H  | 0.47015900000 | 3.77378100000  | 1.33692900000  | H | -4.29487700000 | 2.42467900000  | 1.79797300000  |
| C  | 3.07426100000 | 0.17794400000  | 0.46730700000  | H | -3.67028000000 | 2.77156800000  | -2.42437200000 |
| C  | 4.03769600000 | -0.00495800000 | -0.55232700000 | H | -5.19106400000 | 2.78825800000  | -0.47672900000 |
| C  | 3.14035600000 | -0.56283900000 | 1.67385600000  | C | 4.14768800000  | 0.77095100000  | -1.87182700000 |
| C  | 5.03868600000 | -0.96574400000 | -0.34043000000 | H | 4.64821700000  | 0.07396800000  | -2.55759500000 |
| C  | 4.16430900000 | -1.50351900000 | 1.83037500000  | C | 5.10074100000  | 1.97731200000  | -1.72261100000 |
| C  | 5.10813700000 | -1.71116500000 | 0.83053000000  | H | 5.27093600000  | 2.45313500000  | -2.69629500000 |
| H  | 5.77782100000 | -1.12896200000 | -1.12167600000 | H | 4.68442600000  | 2.73704700000  | -1.05078100000 |
| H  | 4.22005800000 | -2.08373200000 | 2.74749000000  | H | 6.07151700000  | 1.67193200000  | -1.31724800000 |

|   |                 |                 |                 |   |                 |                 |                 |
|---|-----------------|-----------------|-----------------|---|-----------------|-----------------|-----------------|
| C | 2.847175000000  | 1.187459000000  | -2.576526000000 | C | 2.147829000000  | -0.369008000000 | 2.817675000000  |
| H | 2.384823000000  | 2.061279000000  | -2.109331000000 | H | 1.412328000000  | 0.377710000000  | 2.509223000000  |
| H | 3.074242000000  | 1.452170000000  | -3.617013000000 | C | 2.846535000000  | 0.158699000000  | 4.087076000000  |
| H | 2.107171000000  | 0.381141000000  | -2.576259000000 | H | 2.110732000000  | 0.348090000000  | 4.878146000000  |
| C | -0.986984000000 | 2.430381000000  | -2.497870000000 | H | 3.573430000000  | -0.563690000000 | 4.476685000000  |
| H | 0.030141000000  | 2.203339000000  | -2.169805000000 | H | 3.384610000000  | 1.093880000000  | 3.891845000000  |
| C | -0.974358000000 | 3.833808000000  | -3.137740000000 | C | 1.361663000000  | -1.659883000000 | 3.114782000000  |
| H | -1.963318000000 | 4.109038000000  | -3.523509000000 | H | 0.627326000000  | -1.483657000000 | 3.910388000000  |
| H | -0.677233000000 | 4.602826000000  | -2.414914000000 | H | 0.826751000000  | -1.992145000000 | 2.218636000000  |
| H | -0.269481000000 | 3.865244000000  | -3.977314000000 | H | 2.022608000000  | -2.470910000000 | 3.443294000000  |
| C | -1.367312000000 | 1.355937000000  | -3.533817000000 | I | -0.543491000000 | -2.951548000000 | -1.484504000000 |
| H | -1.303810000000 | 0.355562000000  | -3.092293000000 | C | -2.298396000000 | -2.334321000000 | -0.167587000000 |
| H | -2.383977000000 | 1.503103000000  | -3.918498000000 | C | -2.419222000000 | -2.943605000000 | 1.079759000000  |
| H | -0.680869000000 | 1.392962000000  | -4.388344000000 | C | -3.325522000000 | -1.569983000000 | -0.716492000000 |
| C | -1.736737000000 | 1.982165000000  | 2.576766000000  | C | -3.604113000000 | -2.765609000000 | 1.802019000000  |
| H | -0.655123000000 | 1.830386000000  | 2.515413000000  | H | -1.612969000000 | -3.545032000000 | 1.486448000000  |
| C | -1.986661000000 | 3.218831000000  | 3.462736000000  | C | -4.500222000000 | -1.397821000000 | 0.021982000000  |
| H | -1.542411000000 | 4.122634000000  | 3.029191000000  | H | -3.216530000000 | -1.103904000000 | 1.689545000000  |
| H | -3.058438000000 | 3.409322000000  | 3.594280000000  | C | -4.643848000000 | -1.996063000000 | 1.276104000000  |
| H | -1.552303000000 | 3.070615000000  | 4.458817000000  | H | -3.708989000000 | -3.235141000000 | 2.777001000000  |
| C | -2.332950000000 | 0.714409000000  | 3.216479000000  | H | -5.300394000000 | -0.788152000000 | -0.388986000000 |
| H | -2.118693000000 | -0.169404000000 | 2.608365000000  | H | -5.563320000000 | -1.865332000000 | 1.839910000000  |
| H | -1.910618000000 | 0.583090000000  | 4.217150000000  | H | 0.913844000000  | 3.819656000000  | -0.379757000000 |
| H | -3.421543000000 | 0.791827000000  | 3.323460000000  | H | 3.055657000000  | 3.028023000000  | 0.342749000000  |

Zero-point correction=

Thermal correction to Energy= 0.727170  
Thermal correction to Enthalpy= 0.728114  
Thermal correction to Gibbs Free Energy= 0.610748  
Sum of electronic and zero-point Energies= -1574.542903  
Sum of electronic and thermal Energies= -1574.502786  
Sum of electronic and thermal Enthalpies= -1574.501841  
Sum of electronic and thermal Free Energies= -1574.619208

0.687053 (Hartree/Particle)

CPCM (Benzene) PBE0-D3/def2TZVP E = -3197.59638181

CPCM (Benzene) M06L/def2TZVP E = -3199.38902415

CPCM (Benzene) M06/def2TZVP E = -3198.38842323

## TS-OA-Ni(0)-PhBr

|    |                 |                 |                 |    |                 |                 |                 |
|----|-----------------|-----------------|-----------------|----|-----------------|-----------------|-----------------|
| Ni | 0.159344000000  | -0.411702000000 | -1.050115000000 | H  | -0.899615000000 | 4.920767000000  | 0.360340000000  |
| C  | 0.623096000000  | 0.561334000000  | 0.419358000000  | H  | -0.324619000000 | 5.186932000000  | -1.298920000000 |
| C  | 0.598801000000  | 2.207988000000  | 2.104976000000  | C  | -1.255684000000 | 2.816579000000  | -2.404810000000 |
| C  | 1.952884000000  | 1.501307000000  | 2.124261000000  | H  | -1.144654000000 | 1.739667000000  | -2.570182000000 |
| N  | 1.891613000000  | 0.724967000000  | 0.886033000000  | H  | -2.253581000000 | 3.121443000000  | -2.742516000000 |
| N  | -0.163814000000 | 1.348257000000  | 1.198776000000  | H  | -0.518941000000 | 3.330571000000  | -3.032537000000 |
| H  | 2.057024000000  | 0.830197000000  | 2.989538000000  | C  | -1.946066000000 | -0.050299000000 | 2.915239000000  |
| H  | 0.126081000000  | 2.270577000000  | 3.089083000000  | H  | -0.941729000000 | 0.274743000000  | 3.209040000000  |
| C  | 2.974249000000  | -0.115972000000 | 0.487992000000  | C  | -2.802151000000 | -0.084544000000 | 4.184773000000  |
| C  | 3.962870000000  | 0.378904000000  | -0.379176000000 | H  | -2.964902000000 | 0.919316000000  | 4.591940000000  |
| C  | 3.024260000000  | -1.430932000000 | 0.989659000000  | H  | -3.781349000000 | -0.541807000000 | 4.003008000000  |
| C  | 5.007576000000  | -0.481545000000 | -0.729845000000 | H  | -2.304038000000 | -0.688278000000 | 4.951112000000  |
| C  | 4.092206000000  | -2.245252000000 | 0.614535000000  | C  | -1.806366000000 | -1.452522000000 | 2.308672000000  |
| C  | 5.080479000000  | -1.776883000000 | -0.239537000000 | H  | -1.166441000000 | -1.436681000000 | 1.421009000000  |
| H  | 5.777633000000  | -0.121365000000 | -1.408124000000 | H  | -1.375128000000 | -2.147046000000 | 3.040548000000  |
| H  | 4.146471000000  | -3.263847000000 | 0.989416000000  | H  | -2.784554000000 | -1.837210000000 | 2.001489000000  |
| H  | 5.902124000000  | -2.424615000000 | -0.531069000000 | C  | 1.946288000000  | -1.997482000000 | 1.902294000000  |
| C  | -1.558762000000 | 1.563919000000  | 0.993635000000  | H  | 1.194563000000  | -1.223544000000 | 2.079150000000  |
| C  | -2.457306000000 | 0.920015000000  | 1.862226000000  | C  | 2.516146000000  | -2.404728000000 | 3.267278000000  |
| C  | -1.995090000000 | 2.431578000000  | -0.017775000000 | H  | 1.712548000000  | -2.754090000000 | 3.925597000000  |
| C  | -3.819637000000 | 1.154466000000  | 1.688810000000  | H  | 3.247324000000  | -3.215982000000 | 3.174389000000  |
| C  | -3.370694000000 | 2.634439000000  | -0.157184000000 | H  | 3.016819000000  | -1.560948000000 | 3.755504000000  |
| C  | -4.274371000000 | 2.006122000000  | 0.687706000000  | C  | 1.219245000000  | -3.165350000000 | 1.223251000000  |
| H  | -4.538674000000 | 0.663725000000  | 2.336925000000  | H  | 0.410005000000  | -3.536499000000 | 1.861873000000  |
| H  | -3.735892000000 | 3.303302000000  | -0.932172000000 | H  | 0.783951000000  | -2.833055000000 | 0.274317000000  |
| H  | -5.340173000000 | 2.179296000000  | 0.566679000000  | H  | 1.902218000000  | -3.998116000000 | 1.018943000000  |
| C  | 4.038284000000  | 1.793282000000  | -0.952235000000 | Br | -0.455483000000 | -1.444001000000 | -2.978930000000 |
| H  | 4.571599000000  | 1.679020000000  | -1.904650000000 | C  | -1.933167000000 | -1.720128000000 | -1.456908000000 |
| C  | 4.920043000000  | 2.684985000000  | -0.062611000000 | C  | -2.006215000000 | -3.010840000000 | -0.944420000000 |
| H  | 5.063727000000  | 3.667393000000  | -0.526881000000 | C  | -3.007660000000 | -0.839914000000 | -1.402890000000 |
| H  | 4.457113000000  | 2.843245000000  | 0.917940000000  | C  | -3.188718000000 | -3.415987000000 | -0.330126000000 |
| H  | 5.903825000000  | 2.233555000000  | 0.101962000000  | H  | -1.159816000000 | -3.684369000000 | -1.019801000000 |
| C  | 2.720986000000  | 2.500900000000  | -1.290582000000 | C  | -4.177116000000 | -1.262499000000 | -0.776667000000 |
| H  | 2.236590000000  | 2.909033000000  | -0.398774000000 | H  | -2.928558000000 | 0.160977000000  | -1.811168000000 |
| H  | 2.928947000000  | 3.339675000000  | -1.965283000000 | C  | -4.275632000000 | -2.547917000000 | -0.247117000000 |
| H  | 2.010501000000  | 1.827963000000  | -1.781571000000 | H  | -3.257809000000 | -4.418523000000 | 0.082592000000  |
| C  | -1.024709000000 | 3.161874000000  | -0.929377000000 | H  | -5.013123000000 | -0.573870000000 | -0.704180000000 |
| H  | -0.015458000000 | 2.824809000000  | -0.684400000000 | H  | -5.196365000000 | -2.872425000000 | 0.228066000000  |
| C  | -1.081849000000 | 4.677354000000  | -0.692465000000 | H  | 0.669518000000  | 3.223943000000  | 1.690515000000  |
| H  | -2.061235000000 | 5.088496000000  | -0.963856000000 | H  | 2.796427000000  | 2.195224000000  | 2.121580000000  |

Zero-point correction=

Thermal correction to Energy= 0.735728

0.697547 (Hartree/Particle)

Thermal correction to Enthalpy= 0.736672  
 Thermal correction to Gibbs Free Energy= 0.627563  
 Sum of electronic and zero-point Energies= -4134.159563  
 Sum of electronic and thermal Energies= -4134.121382  
 Sum of electronic and thermal Enthalpies= -4134.120438  
 Sum of electronic and thermal Free Energies= -4134.229547  
 CPCM (Benzene) PBE0-D3/def2TZVP E = -5473.7441425  
 CPCM (Benzene) M06L/def2TZVP E = -5475.58346736  
 CPCM (Benzene) M06/def2TZVP E = -5474.69464536

### TS-OA-Ni(0)-PhCl

|    |                 |                 |                 |    |                 |                 |                 |
|----|-----------------|-----------------|-----------------|----|-----------------|-----------------|-----------------|
| Ni | 0.068947000000  | -0.224341000000 | -1.286899000000 | H  | -1.069661000000 | 4.673403000000  | 1.122035000000  |
| C  | 0.576478000000  | 0.455809000000  | 0.298075000000  | H  | -0.554566000000 | 5.314429000000  | -0.452079000000 |
| C  | 0.526998000000  | 1.762605000000  | 2.269411000000  | C  | -1.447823000000 | 3.214003000000  | -2.027703000000 |
| C  | 1.886260000000  | 1.072247000000  | 2.165313000000  | H  | -1.317711000000 | 2.201763000000  | -2.424656000000 |
| N  | 1.842775000000  | 0.541358000000  | 0.803837000000  | H  | -2.459458000000 | 3.560959000000  | -2.270559000000 |
| N  | -0.217901000000 | 1.089427000000  | 1.208175000000  | H  | -0.737645000000 | 3.870766000000  | -2.542634000000 |
| H  | 1.988804000000  | 0.254031000000  | 2.894052000000  | C  | -1.908779000000 | -0.695019000000 | 2.638903000000  |
| H  | 0.046609000000  | 1.627401000000  | 3.243232000000  | H  | -0.871290000000 | -0.441428000000 | 2.878330000000  |
| C  | 2.938230000000  | -0.209090000000 | 0.285735000000  | C  | -2.649127000000 | -0.892087000000 | 3.965480000000  |
| C  | 3.950934000000  | 0.442098000000  | -0.438450000000 | H  | -2.724944000000 | 0.045929000000  | 4.526103000000  |
| C  | 2.989450000000  | -1.593488000000 | 0.540393000000  | H  | -3.663429000000 | -1.278502000000 | 3.813446000000  |
| C  | 5.023916000000  | -0.330262000000 | -0.893613000000 | H  | -2.116067000000 | -1.621054000000 | 4.585625000000  |
| C  | 4.083213000000  | -2.317227000000 | 0.067185000000  | C  | -1.871110000000 | -1.993387000000 | 1.822776000000  |
| C  | 5.098700000000  | -1.692494000000 | -0.643363000000 | H  | -1.344213000000 | -1.843884000000 | 0.874047000000  |
| H  | 5.815525000000  | 0.155140000000  | -1.460118000000 | H  | -1.363296000000 | -2.786925000000 | 2.385098000000  |
| H  | 4.138796000000  | -3.386777000000 | 0.252240000000  | H  | -2.886483000000 | -2.332325000000 | 1.591406000000  |
| H  | 5.943580000000  | -2.268244000000 | -1.010080000000 | C  | 1.888175000000  | -2.324006000000 | 1.295484000000  |
| C  | -1.621269000000 | 1.275581000000  | 1.061413000000  | H  | 1.115285000000  | -1.601522000000 | 1.568915000000  |
| C  | -2.475956000000 | 0.433100000000  | 1.792836000000  | C  | 2.413574000000  | -2.953842000000 | 2.592204000000  |
| C  | -2.113840000000 | 2.296030000000  | 0.234589000000  | H  | 1.592032000000  | -3.422684000000 | 3.146263000000  |
| C  | -3.851287000000 | 0.625947000000  | 1.672559000000  | H  | 3.162991000000  | -3.727548000000 | 2.388857000000  |
| C  | -3.499030000000 | 2.450683000000  | 0.139785000000  | H  | 2.879245000000  | -2.202343000000 | 3.239666000000  |
| C  | -4.360529000000 | 1.626856000000  | 0.852397000000  | C  | 1.211554000000  | -3.366918000000 | 0.397250000000  |
| H  | -4.535263000000 | -0.016309000000 | 2.219463000000  | H  | 0.385786000000  | -3.854290000000 | 0.927845000000  |
| H  | -3.907434000000 | 3.234788000000  | -0.492625000000 | H  | 0.804334000000  | -2.878983000000 | -0.494959000000 |
| H  | -5.435011000000 | 1.766811000000  | 0.770264000000  | H  | 1.917718000000  | -4.142996000000 | 0.079318000000  |
| C  | 4.015815000000  | 1.936844000000  | -0.750238000000 | Cl | -0.581882000000 | -0.785686000000 | -3.283081000000 |
| H  | 4.580092000000  | 1.999624000000  | -1.689904000000 | C  | -1.848356000000 | -1.491308000000 | -2.197948000000 |
| C  | 4.852585000000  | 2.672836000000  | 0.308961000000  | C  | -1.798809000000 | -2.862731000000 | -1.956891000000 |
| H  | 4.996472000000  | 3.721529000000  | 0.024462000000  | C  | -2.951649000000 | -0.720369000000 | -1.835240000000 |
| H  | 4.354235000000  | 2.658676000000  | 1.284611000000  | C  | -2.875135000000 | -3.467709000000 | -1.315167000000 |
| H  | 5.837468000000  | 2.210146000000  | 0.431223000000  | H  | -0.932962000000 | -3.439265000000 | -2.262912000000 |
| C  | 2.693274000000  | 2.671389000000  | -1.003170000000 | C  | -4.014106000000 | -1.346141000000 | -1.193508000000 |
| H  | 2.176456000000  | 2.914168000000  | -0.070001000000 | H  | -2.968118000000 | 0.346858000000  | -2.024428000000 |
| H  | 2.901967000000  | 3.615843000000  | -1.519783000000 | C  | -3.985391000000 | -2.716274000000 | -0.939548000000 |
| H  | 2.008420000000  | 2.077542000000  | -1.616898000000 | H  | -2.842124000000 | -4.534524000000 | -1.115524000000 |
| C  | -1.185875000000 | 3.233734000000  | -0.518057000000 | H  | -4.865900000000 | -0.748867000000 | -0.886087000000 |
| H  | -0.163333000000 | 2.876811000000  | -0.373622000000 | H  | -4.824941000000 | -3.195208000000 | -0.445141000000 |
| C  | -1.277330000000 | 4.658461000000  | 0.046189000000  | H  | 0.595273000000  | 2.841211000000  | 2.065889000000  |
| H  | -2.276813000000 | 5.083629000000  | -0.104737000000 | H  | 2.724386000000  | 1.759685000000  | 2.301560000000  |

Zero-point correction= 0.697608 (Hartree/Particle)  
 Thermal correction to Energy= 0.735669  
 Thermal correction to Enthalpy= 0.736613  
 Thermal correction to Gibbs Free Energy= 0.628131  
 Sum of electronic and zero-point Energies= -2022.900586  
 Sum of electronic and thermal Energies= -2022.862526  
 Sum of electronic and thermal Enthalpies= -2022.861582  
 Sum of electronic and thermal Free Energies= -2022.970063  
 CPCM (Benzene) PBE0-D3/def2TZVP E = -3359.9480567  
 CPCM (Benzene) M06L/def2TZVP E = -3361.7291304  
 CPCM (Benzene) M06/def2TZVP E = -3360.82253603

### SIPr-Ni-Ph-I

|    |                 |                 |                 |   |                 |                 |                 |
|----|-----------------|-----------------|-----------------|---|-----------------|-----------------|-----------------|
| Ni | -0.605802000000 | -0.877511000000 | -0.265412000000 | C | -4.619376000000 | 2.304391000000  | -0.110671000000 |
| C  | 0.234076000000  | 0.735624000000  | 0.581813000000  | H | -5.085804000000 | 1.489916000000  | 1.818523000000  |
| C  | 1.584255000000  | 2.299932000000  | 1.714594000000  | H | -3.866882000000 | 3.075032000000  | -1.964897000000 |
| C  | 0.217444000000  | 2.934131000000  | 1.448672000000  | H | -5.660978000000 | 2.454605000000  | -0.381761000000 |
| N  | -0.558483000000 | 1.769668000000  | 0.965046000000  | C | 2.661609000000  | 0.194586000000  | 0.830065000000  |
| N  | 1.500222000000  | 1.042193000000  | 0.934396000000  | C | 3.653029000000  | 0.522064000000  | -0.123416000000 |
| H  | 0.262342000000  | 3.703539000000  | 0.668315000000  | C | 2.820581000000  | -0.887812000000 | 1.722390000000  |
| H  | 2.419216000000  | 2.917008000000  | 1.377869000000  | C | 4.790497000000  | -0.289560000000 | -0.190899000000 |
| C  | -1.945949000000 | 1.915581000000  | 0.595297000000  | C | 3.972251000000  | -1.675736000000 | 1.599839000000  |
| C  | -2.960644000000 | 1.558339000000  | 1.517788000000  | C | 4.947199000000  | -1.386276000000 | 0.651623000000  |
| C  | -2.258581000000 | 2.469658000000  | -0.670099000000 | H | 5.562437000000  | -0.063764000000 | -0.920710000000 |
| C  | -4.291624000000 | 1.764379000000  | 1.129034000000  | H | 4.110026000000  | -2.522870000000 | 2.265843000000  |
| C  | -3.608416000000 | 2.652256000000  | -0.998577000000 | H | 5.833615000000  | -2.010166000000 | 0.573733000000  |

|   |                 |                 |                 |   |                 |                 |                 |
|---|-----------------|-----------------|-----------------|---|-----------------|-----------------|-----------------|
| C | -2.749097000000 | 0.915322000000  | 2.893438000000  | H | 3.016364000000  | 0.609198000000  | -2.839481000000 |
| H | -3.741562000000 | 0.936034000000  | 3.361796000000  | H | 3.579077000000  | 2.265707000000  | -3.152300000000 |
| C | -1.819973000000 | 1.669908000000  | 3.861745000000  | H | 4.743788000000  | 1.004465000000  | -2.734001000000 |
| H | -1.943058000000 | 1.266204000000  | 4.873594000000  | C | -1.196443000000 | 2.898103000000  | -1.681729000000 |
| H | -0.765973000000 | 1.555234000000  | 3.594701000000  | H | -0.218152000000 | 2.573873000000  | -1.315317000000 |
| H | -2.058275000000 | 2.739225000000  | 3.899891000000  | C | -1.164386000000 | 4.434470000000  | -1.829695000000 |
| C | -2.356825000000 | -0.571407000000 | 2.791112000000  | H | -0.360425000000 | 4.735093000000  | -2.511679000000 |
| H | -1.359383000000 | -0.695379000000 | 2.353799000000  | H | -2.108273000000 | 4.810568000000  | -2.241515000000 |
| H | -2.339004000000 | -1.028806000000 | 3.788259000000  | H | -1.003089000000 | 4.937299000000  | -0.868775000000 |
| H | -3.063221000000 | -1.128989000000 | 2.169178000000  | C | -1.394437000000 | 2.227390000000  | -3.055113000000 |
| C | 1.826140000000  | -1.205109000000 | 2.835734000000  | H | -0.586056000000 | 2.523639000000  | -3.733495000000 |
| H | 0.993345000000  | -0.499858000000 | 2.762013000000  | H | -1.375318000000 | 1.137116000000  | -2.971693000000 |
| C | 2.468346000000  | -1.008704000000 | 4.224791000000  | H | -2.341528000000 | 2.525735000000  | -3.519541000000 |
| H | 3.295663000000  | -1.709477000000 | 4.385488000000  | I | 0.717706000000  | -1.456484000000 | -2.306772000000 |
| H | 2.867200000000  | 0.005561000000  | 4.343764000000  | C | -1.805419000000 | -2.231177000000 | -0.636006000000 |
| H | 1.728640000000  | -1.179704000000 | 5.016035000000  | C | -1.610746000000 | -3.593575000000 | -0.348134000000 |
| C | 1.233709000000  | -2.620263000000 | 2.699966000000  | C | -3.115656000000 | -1.770623000000 | -0.868911000000 |
| H | 0.738862000000  | -2.750189000000 | 1.732074000000  | C | -2.704054000000 | -4.452981000000 | -0.210000000000 |
| H | 2.008781000000  | -3.390527000000 | 2.786762000000  | H | -0.602654000000 | -3.983803000000 | -0.233102000000 |
| H | 0.494648000000  | -2.801728000000 | 3.489563000000  | C | -4.209928000000 | -2.632763000000 | -0.728893000000 |
| C | 3.546829000000  | 1.735322000000  | -1.044207000000 | H | -3.291451000000 | -0.735094000000 | -1.157702000000 |
| H | 2.537312000000  | 2.146685000000  | -0.940045000000 | C | -4.004734000000 | -3.973249000000 | -0.395021000000 |
| C | 4.555844000000  | 2.829043000000  | -0.631571000000 | H | -2.541222000000 | -5.501424000000 | 0.030510000000  |
| H | 4.443398000000  | 3.122699000000  | 0.418888000000  | H | -5.218164000000 | -2.260421000000 | -0.898269000000 |
| H | 5.586590000000  | 2.478829000000  | -0.761760000000 | H | -4.852692000000 | -4.647161000000 | -0.299551000000 |
| H | 4.427415000000  | 3.724560000000  | -1.251415000000 | H | 1.738213000000  | 2.060825000000  | 2.775415000000  |
| C | 3.732396000000  | 1.375338000000  | -2.530384000000 | H | -0.239389000000 | 3.372039000000  | 2.337856000000  |

Zero-point correction=

Thermal correction to Energy=

Thermal correction to Enthalpy=

Thermal correction to Gibbs Free Energy=

Sum of electronic and zero-point Energies=

Sum of electronic and thermal Energies=

Sum of electronic and thermal Enthalpies=

Sum of electronic and thermal Free Energies=

CPCM (Benzene) PBE0-D3/def2TZVP E = -3197.66014718

CPCM (Benzene) M06L/def2TZVP E = -3199.44175535

0.688846 (Hartree/Particle)

0.729065

0.730009

0.613043

-1574.606165

-1574.565946

-1574.565002

-1574.681968

### [(SIPr)Ni(SeCF<sub>3</sub>)<sub>2</sub>] (4) *singlet*

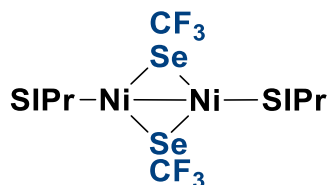

|    |                 |                 |                 |   |                 |                 |                 |
|----|-----------------|-----------------|-----------------|---|-----------------|-----------------|-----------------|
| Se | -0.133008000000 | -1.862688000000 | 0.648476000000  | H | -5.573337000000 | 4.396400000000  | 0.617562000000  |
| Se | 0.135221000000  | 1.942289000000  | -0.365030000000 | H | -5.103245000000 | 5.281094000000  | -0.847650000000 |
| Ni | -1.205919000000 | 0.090641000000  | 0.004419000000  | H | -4.572342000000 | 5.845983000000  | 0.745110000000  |
| Ni | 1.211646000000  | -0.070488000000 | 0.053320000000  | C | -2.958641000000 | 0.299337000000  | 3.460321000000  |
| N  | -3.738394000000 | 1.289927000000  | 0.787235000000  | H | -3.249205000000 | -0.294313000000 | 2.589578000000  |
| N  | -4.071445000000 | -0.385410000000 | -0.572547000000 | C | -1.658011000000 | -0.319055000000 | 4.004295000000  |
| N  | 3.730918000000  | -0.715412000000 | 1.350433000000  | H | -0.850294000000 | -0.254696000000 | 3.269551000000  |
| N  | 4.082705000000  | 0.055033000000  | -0.662352000000 | H | -1.813462000000 | -1.377660000000 | 4.242565000000  |
| C  | -3.102496000000 | 0.322823000000  | 0.065723000000  | H | -1.322284000000 | 0.180608000000  | 4.920559000000  |
| C  | -5.209864000000 | 1.158390000000  | 0.768958000000  | C | -4.088523000000 | 0.190411000000  | 4.505982000000  |
| H  | -5.687350000000 | 2.126624000000  | 0.600808000000  | H | -3.837641000000 | 0.744057000000  | 5.418766000000  |
| H  | -5.564349000000 | 0.764844000000  | 1.731211000000  | H | -4.253244000000 | -0.857416000000 | 4.784922000000  |
| C  | -5.426285000000 | 0.175404000000  | -0.382126000000 | H | -5.034280000000 | 0.594438000000  | 4.126191000000  |
| H  | -6.142803000000 | -0.614957000000 | -0.144911000000 | C | -3.920497000000 | -1.565949000000 | -1.382375000000 |
| H  | -5.758749000000 | 0.674755000000  | -1.300811000000 | C | -4.125143000000 | -2.827812000000 | -0.775629000000 |
| C  | -3.139662000000 | 2.203177000000  | 1.722928000000  | C | -4.071439000000 | -3.966753000000 | -1.587114000000 |
| C  | -2.772039000000 | 1.745797000000  | 3.009407000000  | H | -4.216713000000 | -4.946431000000 | -1.140420000000 |
| C  | -2.259182000000 | 2.680238000000  | 3.918634000000  | C | -3.836772000000 | -3.866615000000 | -2.954502000000 |
| H  | -1.968237000000 | 2.350110000000  | 4.911898000000  | H | -3.798532000000 | -4.763370000000 | -3.567631000000 |
| C  | -2.127708000000 | 4.022994000000  | 3.578635000000  | C | -3.653418000000 | -2.616634000000 | -3.536080000000 |
| H  | -1.730148000000 | 4.731594000000  | 4.300780000000  | H | -3.477975000000 | -2.547856000000 | -4.605420000000 |
| C  | -2.514449000000 | 4.458349000000  | 2.314695000000  | C | -3.694038000000 | -1.443796000000 | -2.771396000000 |
| H  | -2.415485000000 | 5.509543000000  | 2.059266000000  | C | -3.544479000000 | -0.092935000000 | -3.464503000000 |
| C  | -3.028857000000 | 3.567239000000  | 1.365522000000  | H | -3.372613000000 | 0.664918000000  | -2.694272000000 |
| C  | -3.476143000000 | 4.100123000000  | 0.006526000000  | C | -4.835697000000 | 0.279467000000  | -4.225071000000 |
| H  | -3.703488000000 | 3.239389000000  | -0.630382000000 | H | -5.036984000000 | -0.440226000000 | -5.028001000000 |
| C  | -2.372545000000 | 4.908328000000  | -0.701722000000 | H | -4.739768000000 | 1.272604000000  | -4.680346000000 |
| H  | -2.144773000000 | 5.837758000000  | -0.166120000000 | H | -5.712355000000 | 0.290121000000  | -3.567167000000 |
| H  | -2.697527000000 | 5.181931000000  | -1.712463000000 | C | -2.337455000000 | -0.050262000000 | -4.419228000000 |
| H  | -1.451353000000 | 4.326448000000  | -0.781721000000 | H | -1.418128000000 | -0.344750000000 | -3.908825000000 |
| C  | -4.757388000000 | 4.950796000000  | 0.139296000000  | H | -2.198760000000 | 0.966763000000  | -4.800483000000 |

|   |                 |                 |                 |   |                 |                 |                 |
|---|-----------------|-----------------|-----------------|---|-----------------|-----------------|-----------------|
| H | -2.481152000000 | -0.711245000000 | -5.282111000000 | H | 6.036523000000  | 4.124288000000  | -1.824984000000 |
| C | -4.446054000000 | -2.988477000000 | 0.708746000000  | C | 3.455286000000  | 4.127585000000  | -0.745657000000 |
| H | -4.360720000000 | -2.003731000000 | 1.178533000000  | H | 3.519950000000  | 4.812919000000  | -1.599041000000 |
| C | -5.894616000000 | -3.481543000000 | 0.912310000000  | H | 3.686177000000  | 4.705357000000  | 0.157911000000  |
| H | -6.031984000000 | -4.487736000000 | 0.498786000000  | H | 2.423986000000  | 3.774483000000  | -0.674110000000 |
| H | -6.624192000000 | -2.825278000000 | 0.423160000000  | C | 3.116251000000  | -1.037618000000 | 2.610064000000  |
| H | -6.138778000000 | -3.524722000000 | 1.980716000000  | C | 3.002326000000  | -2.397600000000 | 2.981537000000  |
| C | -3.457030000000 | -3.919516000000 | 1.435374000000  | C | 2.476396000000  | -2.695278000000 | 4.244085000000  |
| H | -3.708099000000 | -3.971880000000 | 2.502099000000  | H | 2.375816000000  | -3.733200000000 | 4.548054000000  |
| H | -2.429844000000 | -3.558954000000 | 1.341530000000  | C | 2.077124000000  | -1.686201000000 | 5.115440000000  |
| H | -3.495841000000 | -4.940240000000 | 1.037419000000  | H | 1.669847000000  | -1.938772000000 | 6.091144000000  |
| C | 3.105987000000  | -0.241668000000 | 0.235078000000  | C | 2.206814000000  | -0.353326000000 | 4.737788000000  |
| C | 5.202492000000  | -0.602113000000 | 1.285146000000  | H | 1.902980000000  | 0.428844000000  | 5.427912000000  |
| H | 5.681687000000  | -1.520751000000 | 1.631263000000  | C | 2.733071000000  | 0.001659000000  | 3.488725000000  |
| H | 5.544820000000  | 0.223696000000  | 1.923281000000  | C | 2.914658000000  | 1.479854000000  | 3.153217000000  |
| C | 5.434143000000  | -0.329897000000 | -0.201888000000 | H | 3.202868000000  | 1.557775000000  | 2.101481000000  |
| H | 6.150427000000  | 0.474406000000  | -0.386879000000 | C | 4.044519000000  | 2.102500000000  | 4.000469000000  |
| H | 5.774845000000  | -1.222855000000 | -0.740570000000 | H | 3.799181000000  | 2.075221000000  | 5.068987000000  |
| C | 3.936093000000  | 0.658709000000  | -1.961137000000 | H | 4.201332000000  | 3.151031000000  | 3.719712000000  |
| C | 4.127922000000  | 2.055644000000  | -2.079414000000 | H | 4.993238000000  | 1.569320000000  | 3.867592000000  |
| C | 4.067947000000  | 2.623546000000  | -3.357249000000 | C | 1.611952000000  | 2.283729000000  | 3.315046000000  |
| H | 4.201972000000  | 3.695586000000  | -3.470488000000 | H | 1.286461000000  | 2.326643000000  | 4.361125000000  |
| C | 3.840997000000  | 1.840476000000  | -4.484121000000 | H | 0.799645000000  | 1.846495000000  | 2.727245000000  |
| H | 3.797213000000  | 2.301297000000  | -5.467621000000 | H | 1.758571000000  | 3.314484000000  | 2.972418000000  |
| C | 3.672720000000  | 0.466326000000  | -4.350471000000 | C | 3.457031000000  | -3.535825000000 | 2.071781000000  |
| H | 3.503737000000  | -0.137374000000 | -5.237054000000 | H | 3.661230000000  | -3.107571000000 | 1.085253000000  |
| C | 3.719187000000  | -0.154885000000 | -3.095882000000 | C | 4.757068000000  | -4.182262000000 | 2.596909000000  |
| C | 3.586038000000  | -1.672266000000 | -3.006594000000 | H | 5.563244000000  | -3.450237000000 | 2.722979000000  |
| H | 3.398185000000  | -1.934152000000 | -1.960940000000 | H | 5.107399000000  | -4.957492000000 | 1.904731000000  |
| C | 2.400387000000  | -2.211984000000 | -3.826803000000 | H | 4.592029000000  | -4.655654000000 | 3.572368000000  |
| H | 2.566737000000  | -2.095140000000 | -4.904245000000 | C | 2.371349000000  | -4.612083000000 | 1.883780000000  |
| H | 1.471511000000  | -1.701732000000 | -3.563783000000 | H | 2.170580000000  | -5.151951000000 | 2.816813000000  |
| H | 2.264057000000  | -3.279908000000 | -3.627138000000 | H | 2.698606000000  | -5.349241000000 | 1.141169000000  |
| C | 4.893590000000  | -2.365096000000 | -3.447666000000 | H | 1.435215000000  | -4.167557000000 | 1.538571000000  |
| H | 5.108682000000  | -2.156711000000 | -4.502927000000 | C | -0.082905000000 | -2.998170000000 | -0.963682000000 |
| H | 4.810143000000  | -3.452364000000 | -3.330437000000 | C | 0.081370000000  | 2.125980000000  | -2.330203000000 |
| H | 5.757147000000  | -2.025348000000 | -2.864545000000 | F | 1.160653000000  | -3.508613000000 | -1.157581000000 |
| C | 4.441472000000  | 2.952621000000  | -0.883670000000 | F | -0.423002000000 | -2.352990000000 | -2.099944000000 |
| H | 4.347585000000  | 2.348097000000  | 0.023818000000  | F | -0.917139000000 | -4.053122000000 | -0.846228000000 |
| C | 5.891924000000  | 3.476934000000  | -0.951844000000 | F | 0.875846000000  | 3.133389000000  | -2.752027000000 |
| H | 6.620368000000  | 2.660886000000  | -1.026161000000 | F | 0.466712000000  | 1.016336000000  | -2.995044000000 |
| H | 6.130371000000  | 4.065303000000  | -0.057443000000 | F | -1.174516000000 | 2.423726000000  | -2.753653000000 |

Zero-point correction= 1.227867 (Hartree/Particle)  
Thermal correction to Energy= 1.306937  
Thermal correction to Enthalpy= 1.307881  
Thermal correction to Gibbs Free Energy= 1.108151  
Sum of electronic and zero-point Energies= -8136.428102  
Sum of electronic and thermal Energies= -8136.349032  
Sum of electronic and thermal Enthalpies= -8136.348087  
Sum of electronic and thermal Free Energies= -8136.547817

CPCM (Benzene) PBE0-D3/def2TZVP E = -10814.5230821  
CPCM (Benzene) PBE0/def2TZVP E = -10814.3532175  
CPCM (Benzene) M06L/def2TZVP E = -10818.2444619  
CPCM (Benzene) M06/def2TZVP E = -10816.6259851

### [(SIPr)Ni(SeCF<sub>3</sub>)<sub>2</sub>] (4) triplet

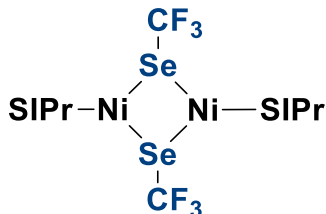

|    |                 |                 |                 |   |                 |                |                 |
|----|-----------------|-----------------|-----------------|---|-----------------|----------------|-----------------|
| Se | -0.083102000000 | -2.178253000000 | 0.358130000000  | H | -6.029467000000 | 0.973406000000 | -1.098086000000 |
| Se | 0.123579000000  | 1.677149000000  | -0.142194000000 | C | -3.194015000000 | 2.140184000000 | 1.956598000000  |
| Ni | -1.509810000000 | -0.219983000000 | 0.069603000000  | C | -2.854476000000 | 1.562985000000 | 3.201085000000  |
| Ni | 1.523261000000  | -0.371379000000 | -0.011213000000 | C | -2.232702000000 | 2.378087000000 | 4.156130000000  |
| N  | -3.891154000000 | 1.353197000000  | 0.974180000000  | H | -1.957854000000 | 1.954526000000 | 5.118297000000  |
| N  | -4.395845000000 | -0.218054000000 | -0.454119000000 | C | -1.974173000000 | 3.721157000000 | 3.901228000000  |
| N  | 4.136413000000  | -0.660153000000 | 1.230257000000  | H | -1.495682000000 | 4.336899000000 | 4.658557000000  |
| N  | 4.346894000000  | 0.496945000000  | -0.606322000000 | C | -2.334445000000 | 4.276024000000 | 2.676826000000  |
| C  | -3.365235000000 | 0.364987000000  | 0.206539000000  | H | -2.130534000000 | 5.325633000000 | 2.485880000000  |
| C  | -5.370431000000 | 1.373274000000  | 0.961163000000  | C | -2.946672000000 | 3.504790000000 | 1.682248000000  |
| H  | -5.747234000000 | 2.387752000000  | 0.810855000000  | C | -3.338220000000 | 4.159384000000 | 0.360557000000  |
| H  | -5.754352000000 | 1.005115000000  | 1.921995000000  | H | -3.635085000000 | 3.361820000000 | -0.327944000000 |
| C  | -5.699278000000 | 0.432269000000  | -0.203368000000 | C | -2.161049000000 | 4.905419000000 | -0.295041000000 |
| H  | -6.461575000000 | -0.311313000000 | 0.046211000000  | H | -1.860785000000 | 5.782257000000 | 0.291299000000  |

|   |                 |                 |                 |   |                 |                 |                 |
|---|-----------------|-----------------|-----------------|---|-----------------|-----------------|-----------------|
| H | -2.449438000000 | 5.258922000000  | -1.291901000000 | H | 3.652183000000  | 0.588284000000  | -5.166172000000 |
| H | -1.293974000000 | 4.249436000000  | -0.398722000000 | C | 3.936930000000  | 0.431192000000  | -3.039280000000 |
| C | -4.539970000000 | 5.110847000000  | 0.542502000000  | C | 3.979398000000  | -1.094039000000 | -3.072895000000 |
| H | -5.406813000000 | 4.604004000000  | 0.982796000000  | H | 3.931391000000  | -1.457652000000 | -2.042112000000 |
| H | -4.846424000000 | 5.530427000000  | -0.423350000000 | C | 2.774022000000  | -1.695908000000 | -3.819070000000 |
| H | -4.282341000000 | 5.947842000000  | 1.202738000000  | H | 2.802547000000  | -1.457846000000 | -4.889147000000 |
| C | -3.167484000000 | 0.112483000000  | 3.558459000000  | H | 1.828747000000  | -1.326435000000 | -3.413895000000 |
| H | -3.613641000000 | -0.365746000000 | 2.682261000000  | H | 2.778055000000  | -2.787012000000 | -3.722753000000 |
| C | -1.896258000000 | -0.685874000000 | 3.902838000000  | C | 5.303005000000  | -1.596116000000 | -3.687585000000 |
| H | -1.177752000000 | -0.655724000000 | 3.077465000000  | H | 5.399373000000  | -1.274007000000 | -4.731477000000 |
| H | -2.146405000000 | -1.736007000000 | 4.094602000000  | H | 5.342988000000  | -2.691971000000 | -3.669816000000 |
| H | -1.402525000000 | -0.291139000000 | 4.798711000000  | H | 6.175880000000  | -1.214900000000 | -3.144163000000 |
| C | -4.195992000000 | 0.029297000000  | 4.705310000000  | C | 4.268292000000  | 3.417940000000  | -0.583485000000 |
| H | -3.799167000000 | 0.461374000000  | 5.631499000000  | H | 4.298817000000  | 2.726658000000  | 0.264954000000  |
| H | -4.455867000000 | -1.016219000000 | 4.910563000000  | C | 5.600643000000  | 4.195692000000  | -0.609722000000 |
| H | -5.118656000000 | 0.568136000000  | 4.459448000000  | H | 6.460390000000  | 3.532112000000  | -0.761992000000 |
| C | -4.316438000000 | -1.351262000000 | -1.339289000000 | H | 5.749647000000  | 4.734879000000  | 0.333683000000  |
| C | -4.502483000000 | -2.645579000000 | -0.799850000000 | H | 5.610762000000  | 4.934479000000  | -1.419843000000 |
| C | -4.496456000000 | -3.733926000000 | -1.679879000000 | C | 3.086041000000  | 4.374911000000  | -0.338013000000 |
| H | -4.627402000000 | -4.737746000000 | -1.285885000000 | H | 3.002454000000  | 5.124508000000  | -1.133750000000 |
| C | -4.324841000000 | -3.552622000000 | -3.048115000000 | H | 3.228593000000  | 4.911699000000  | 0.608270000000  |
| H | -4.322302000000 | -4.410994000000 | -3.714853000000 | H | 2.141588000000  | 3.827194000000  | -0.285230000000 |
| C | -4.154177000000 | -2.271223000000 | -3.561972000000 | C | 3.547008000000  | -1.316997000000 | 2.365793000000  |
| H | -4.023050000000 | -2.139751000000 | -4.631854000000 | C | 3.579540000000  | -2.727989000000 | 2.428836000000  |
| C | -4.146056000000 | -1.146526000000 | -2.727503000000 | C | 3.027502000000  | -3.348881000000 | 3.555631000000  |
| C | -3.992200000000 | 0.241081000000  | -3.342901000000 | H | 3.032986000000  | -4.433020000000 | 3.623011000000  |
| H | -3.792310000000 | 0.949288000000  | -2.533199000000 | C | 2.467793000000  | -2.602564000000 | 4.588189000000  |
| C | -5.293448000000 | 0.676185000000  | -4.051185000000 | H | 2.040751000000  | -3.104643000000 | 5.452516000000  |
| H | -5.521541000000 | 0.011568000000  | -4.893403000000 | C | 2.460182000000  | -1.212587000000 | 4.515785000000  |
| H | -5.193117000000 | 1.694541000000  | -4.445568000000 | H | 2.030882000000  | -0.637367000000 | 5.331429000000  |
| H | -6.156753000000 | 0.656210000000  | -3.375786000000 | C | 3.001874000000  | -0.540080000000 | 3.413205000000  |
| C | -2.802979000000 | 0.325299000000  | -4.317763000000 | C | 3.020833000000  | 0.986038000000  | 3.403650000000  |
| H | -1.875400000000 | -0.004724000000 | -3.845768000000 | H | 3.379067000000  | 1.315109000000  | 2.424142000000  |
| H | -2.662546000000 | 1.361369000000  | -4.644368000000 | C | 3.996322000000  | 1.530819000000  | 4.468210000000  |
| H | -2.971132000000 | -0.284489000000 | -5.213315000000 | H | 3.673391000000  | 1.255816000000  | 5.479404000000  |
| C | -4.740341000000 | -2.894882000000 | 0.687133000000  | H | 4.045489000000  | 2.625256000000  | 4.418900000000  |
| H | -4.613475000000 | -1.943084000000 | 1.211811000000  | H | 5.010135000000  | 1.137312000000  | 4.328596000000  |
| C | -6.182429000000 | -3.379344000000 | 0.945150000000  | C | 1.618118000000  | 1.591916000000  | 3.591803000000  |
| H | -6.365684000000 | -4.349930000000 | 0.469127000000  | H | 1.201786000000  | 1.352127000000  | 4.577164000000  |
| H | -6.925159000000 | -2.675315000000 | 0.551244000000  | H | 0.922264000000  | 1.224848000000  | 2.831765000000  |
| H | -6.361864000000 | -3.496544000000 | 2.020804000000  | H | 1.661832000000  | 2.683719000000  | 3.507018000000  |
| C | -3.719398000000 | -3.880956000000 | 1.286578000000  | C | 4.214753000000  | -3.583309000000 | 1.336115000000  |
| H | -3.881294000000 | -3.978325000000 | 2.367296000000  | H | 4.478043000000  | -2.921050000000 | 0.505024000000  |
| H | -2.693063000000 | -3.540963000000 | 1.120670000000  | C | 5.514177000000  | -4.245278000000 | 1.841176000000  |
| H | -3.819379000000 | -4.880875000000 | 0.847933000000  | H | 6.233298000000  | -3.503868000000 | 2.209603000000  |
| C | 3.446728000000  | -0.126328000000 | 0.189034000000  | H | 5.993926000000  | -4.814259000000 | 1.035727000000  |
| C | 5.569836000000  | -0.304785000000 | 1.230270000000  | H | 5.308798000000  | -4.940086000000 | 2.664241000000  |
| H | 6.192112000000  | -1.188263000000 | 1.398590000000  | C | 3.245745000000  | -4.644176000000 | 0.781168000000  |
| H | 5.779091000000  | 0.418093000000  | 2.029650000000  | H | 2.964560000000  | -5.374497000000 | 1.549108000000  |
| C | 5.746796000000  | 0.298079000000  | -0.168932000000 | H | 3.723288000000  | -5.195787000000 | -0.037755000000 |
| H | 6.290699000000  | 1.246120000000  | -0.163068000000 | H | 2.330701000000  | -4.185509000000 | 0.398173000000  |
| H | 6.258402000000  | -0.385107000000 | -0.858560000000 | C | -0.202074000000 | -3.009947000000 | -1.417331000000 |
| C | 4.087960000000  | 1.176274000000  | -1.848319000000 | C | -0.073261000000 | 2.010792000000  | -2.056704000000 |
| C | 4.085698000000  | 2.589813000000  | -1.852857000000 | F | 0.967415000000  | -3.605508000000 | -1.766404000000 |
| C | 3.924303000000  | 3.244183000000  | -3.079110000000 | F | -0.497687000000 | -2.133158000000 | -2.405424000000 |
| H | 3.910987000000  | 4.330114000000  | -3.105226000000 | F | -1.148529000000 | -3.971939000000 | -1.453121000000 |
| C | 3.770162000000  | 2.528862000000  | -4.262141000000 | F | 0.722582000000  | 3.019730000000  | -2.478545000000 |
| H | 3.641656000000  | 3.055744000000  | -5.204110000000 | F | 0.218521000000  | 0.938825000000  | -2.834422000000 |
| C | 3.774713000000  | 1.137985000000  | -4.237558000000 | F | -1.345848000000 | 2.378412000000  | -2.377569000000 |

Zero-point correction=

Thermal correction to Energy=

Thermal correction to Enthalpy=

Thermal correction to Gibbs Free Energy=

Sum of electronic and zero-point Energies=

Sum of electronic and thermal Energies=

Sum of electronic and thermal Enthalpies=

Sum of electronic and thermal Free Energies=

CPCM (Benzene) PBE0-D3/def2TZVP E = -10814.5445798

CPCM (Benzene) PBE0/def2TZVP E = -10814.3806999

CPCM (Benzene) M06L/def2TZVP E = -10818.2305149

CPCM (Benzene) M06/def2TZVP E = -10816.6359309

1.225941 (Hartree/Particle)

1.306365

1.307309

1.099876

-8136.456611

-8136.376187

-8136.375243

-8136.582677







Zero-point correction= 1.196159 (Hartree/Particle)  
 Thermal correction to Energy= 1.268536  
 Thermal correction to Enthalpy= 1.269481  
 Thermal correction to Gibbs Free Energy= 1.076361  
 Sum of electronic and zero-point Energies= -2686.237803  
 Sum of electronic and thermal Energies= -2686.165426  
 Sum of electronic and thermal Enthalpies= -2686.164481  
 Sum of electronic and thermal Free Energies= -2686.357601  
 CPCM (Benzene) PBE0-D3/def2TZVP E = -5932.53782537  
 CPCM (Benzene) PBE0/def2TZVP E = -5932.3927131  
 CPCM (Benzene) M06L/def2TZVP E = -5935.59218137  
 CPCM (Benzene) M06/def2TZVP E = -5933.90369117

### TS-OA-bis-SeCF<sub>3</sub>-PhI *triplet*

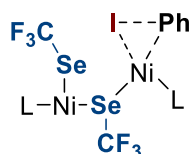

|    |             |             |             |   |             |             |             |
|----|-------------|-------------|-------------|---|-------------|-------------|-------------|
| Ni | -1.97633800 | 0.32733600  | -0.26457500 | C | -2.38120600 | -2.17936100 | 3.30131300  |
| Ni | 2.19636400  | 0.08602900  | -0.46820300 | H | -3.45247300 | -2.21729100 | 3.08472200  |
| C  | -3.52483400 | -0.90606600 | 0.35673400  | H | -2.27740900 | -2.17373400 | 4.39351800  |
| C  | -5.54978000 | -1.84672200 | 1.14623600  | H | -1.97279100 | -1.24094500 | 2.92426400  |
| C  | -4.61074000 | -2.97385200 | 0.72892700  | C | -4.42424300 | 0.97118700  | 3.14601100  |
| C  | 3.86419900  | 0.35338300  | 0.52591800  | H | -3.78156800 | 0.15977000  | 2.80026100  |
| C  | 5.71803900  | 0.03084500  | 1.96323900  | C | -5.28502600 | 0.43107200  | 4.30944500  |
| C  | 5.91960900  | 1.32910000  | 1.18794900  | H | -5.92353300 | 1.22095700  | 4.72338200  |
| N  | -3.35421100 | -2.24633700 | 0.44562500  | H | -5.94122000 | -0.38769900 | 3.99271300  |
| N  | -4.81885600 | -0.64236200 | 0.68175500  | H | -4.64385800 | 0.05904600  | 5.11705200  |
| N  | 4.60210800  | 1.49899400  | 0.53711400  | C | -3.49904200 | 2.09306400  | 3.65257600  |
| N  | 4.54782800  | -0.55731200 | 1.27296500  | H | -2.88731100 | 2.50545000  | 2.84674200  |
| H  | -4.95106000 | -3.48850400 | -0.17647100 | H | -4.06636200 | 2.91253500  | 4.10970900  |
| H  | -6.53108900 | -1.91199200 | 0.67537200  | H | -2.82031000 | 1.69765600  | 4.41447400  |
| H  | 6.70450200  | 1.24249300  | 0.42611700  | C | -6.73509700 | 0.16087400  | -1.41493600 |
| H  | 6.57777800  | -0.64137300 | 1.92310700  | H | -5.95226800 | -0.59879300 | -1.51012900 |
| C  | -2.16185900 | -3.01690700 | 0.16102000  | C | -8.09481100 | -0.55306400 | -1.23381800 |
| C  | -1.36200000 | -3.48953400 | 1.22958400  | H | -8.14641300 | -1.14138200 | -0.31157100 |
| C  | -1.86789200 | -3.36067900 | -1.18452800 | H | -8.91063500 | 0.17859300  | -1.19607600 |
| C  | -0.21290500 | -4.22496700 | 0.90038900  | H | -8.28820900 | -1.22643300 | -2.07726500 |
| C  | -0.71462400 | -4.10946400 | -1.44201000 | C | -6.76533400 | 0.95931100  | -2.73312700 |
| C  | 0.12037500  | -4.52436500 | -0.41238900 | H | -5.84941100 | 1.53680600  | -2.87717700 |
| H  | 0.44042500  | -4.55589800 | 1.70346400  | H | -6.87072700 | 0.27088700  | -3.57993400 |
| H  | -0.45272200 | -4.34949200 | -2.46590500 | H | -7.61679800 | 1.64881000  | -2.76974100 |
| H  | 1.03112300  | -5.07336500 | -0.63283500 | C | -2.78509600 | -3.02297900 | -2.35878000 |
| C  | -5.48647500 | 0.63141300  | 0.80962000  | H | -3.44876400 | -2.20693300 | -2.05680200 |
| C  | -6.40938000 | 1.02191100  | -0.19490800 | C | -3.66361600 | -4.24122600 | -2.72454800 |
| C  | -5.31203900 | 1.40467400  | 1.98356200  | H | -4.35973200 | -3.98279300 | -3.53194700 |
| C  | -7.09948300 | 2.22883500  | -0.02385900 | H | -3.04107200 | -5.07404800 | -3.07252100 |
| C  | -6.03500900 | 2.59963100  | 2.10086700  | H | -4.24965900 | -4.60595300 | -1.87340800 |
| C  | -6.91299000 | 3.01719500  | 1.10706000  | C | -2.01419300 | -2.55349600 | -3.60826400 |
| H  | -7.80140400 | 2.55100700  | -0.78666200 | H | -2.71726000 | -2.15930900 | -4.35193700 |
| H  | -5.91063400 | 3.20676500  | 2.99211500  | H | -1.28681500 | -1.77230500 | -3.37333500 |
| H  | -7.46151300 | 3.94887400  | 1.21851500  | H | -1.47469500 | -3.38002700 | -4.08447200 |
| C  | 4.32312200  | 2.70716500  | -0.19926500 | C | 3.59899600  | 3.82735300  | 2.01231100  |
| C  | 4.65007100  | 2.78571800  | -1.57531800 | H | 3.61352800  | 2.78780900  | 2.35171200  |
| C  | 3.81515700  | 3.82791500  | 0.50080400  | C | 4.74179600  | 4.58759000  | 2.72226100  |
| C  | 4.37569400  | 3.98351600  | -2.24817800 | H | 5.73005800  | 4.19032200  | 2.46557400  |
| C  | 3.57308900  | 5.00416000  | -0.22082300 | H | 4.73530500  | 5.64754200  | 2.44044700  |
| C  | 3.83334700  | 5.07981600  | -1.58581900 | H | 4.62403900  | 4.52951800  | 3.81118800  |
| H  | 4.60267500  | 4.06103400  | -3.30671700 | C | 2.24568200  | 4.42632400  | 2.43514700  |
| H  | 3.18487700  | 5.87614600  | 0.29758600  | H | 1.41133100  | 3.94335000  | 1.92505200  |
| H  | 3.63232500  | 5.99951600  | -2.12949600 | H | 2.10194600  | 4.29276700  | 3.51364400  |
| C  | 4.21303200  | -1.93919800 | 1.51126700  | H | 2.19950600  | 5.50314200  | 2.23250400  |
| C  | 3.64832300  | -2.30970400 | 2.75270200  | C | 5.37523500  | 1.66802700  | -2.32240100 |
| C  | 4.57089200  | -2.91296200 | 0.54302700  | H | 5.27177400  | 0.74740800  | -1.74062100 |
| C  | 3.44925400  | -3.67288500 | 3.01194100  | C | 6.88158200  | 1.99801800  | -2.43337800 |
| C  | 4.33417200  | -4.25801500 | 0.85175000  | H | 7.42108100  | 1.16677000  | -2.90316500 |
| C  | 3.78698600  | -4.64033100 | 2.07408100  | H | 7.03659700  | 2.89033000  | -3.05196300 |
| H  | 3.02515800  | -3.97586600 | 3.96513200  | H | 7.33986900  | 2.19381300  | -1.45734300 |
| H  | 4.59153100  | -5.02324800 | 0.12815800  | C | 4.80007300  | 1.38760900  | -3.72228500 |
| H  | 3.62892400  | -5.69351600 | 2.29332600  | H | 5.29352800  | 0.50959600  | -4.15436900 |
| C  | -1.61732200 | -3.38513800 | 2.74229500  | H | 3.72786300  | 1.18217600  | -3.67765400 |
| H  | -0.61383200 | -3.31951100 | 3.18103700  | H | 4.97253200  | 2.22713600  | -4.40676700 |
| C  | -2.23127300 | -4.70383700 | 3.26725600  | C | 5.23577100  | -2.54680300 | -0.78621100 |
| H  | -2.29199100 | -4.68646300 | 4.36232400  | H | 4.79276700  | -1.60678400 | -1.13135100 |
| H  | -3.24671600 | -4.86046900 | 2.88230200  | C | 6.75563700  | -2.32968300 | -0.61687600 |
| H  | -1.63143300 | -5.57069000 | 2.97145900  | H | 7.23717400  | -3.24204700 | -0.24379100 |

|   |             |             |             |    |             |             |             |
|---|-------------|-------------|-------------|----|-------------|-------------|-------------|
| H | 7.21075100  | -2.08031000 | -1.58288900 | H  | -4.04438700 | 2.69514300  | -0.08184000 |
| H | 6.99144500  | -1.51958500 | 0.07860800  | C  | -0.46920000 | 4.13941100  | -0.55116300 |
| C | 5.00416200  | -3.58435000 | -1.89856900 | H  | -0.04415600 | 2.34699700  | -1.66864300 |
| H | 5.55118200  | -4.51594800 | -1.70745800 | C  | -1.42550200 | 4.85694000  | 0.17568400  |
| H | 3.94435800  | -3.81436600 | -2.02295100 | H  | -3.45911700 | 4.88615900  | 0.90540900  |
| H | 5.36686800  | -3.18250300 | -2.84970800 | H  | 0.52441900  | 4.54867600  | -0.71149600 |
| C | 3.26815800  | -1.29781200 | 3.83051000  | H  | -1.17983400 | 5.83581800  | 0.57819200  |
| H | 3.32915100  | -0.29706700 | 3.39419700  | H  | -5.69330700 | -1.79342500 | 2.23179400  |
| C | 4.23302200  | -1.37069800 | 5.03348800  | H  | -4.45636700 | -3.72054400 | 1.51007300  |
| H | 5.27813400  | -1.22805700 | 4.73659400  | H  | 6.15560000  | 2.17876600  | 1.83117400  |
| H | 3.98088600  | -0.60261200 | 5.77463500  | H  | 5.47946100  | 0.21890100  | 3.01647000  |
| H | 4.16511300  | -2.34677800 | 5.52875400  | Se | 1.29745700  | -0.00034000 | -2.66406800 |
| C | 1.81570700  | -1.47987200 | 4.30846600  | C  | 1.98232200  | -1.68163700 | -3.35469100 |
| H | 1.12348000  | -1.46777800 | 3.46283100  | F  | 3.30592200  | -1.63587000 | -3.67286900 |
| H | 1.68498300  | -2.42336000 | 4.85227200  | F  | 1.33887700  | -2.06239300 | -4.48557400 |
| H | 1.53628000  | -0.66553200 | 4.98578400  | F  | 1.85207300  | -2.72355500 | -2.48293400 |
| I | -2.82922500 | 0.98567600  | -2.68880600 | Se | 0.12854200  | -0.15738200 | 0.98052400  |
| C | -2.05185400 | 2.34707100  | -0.84774600 | C  | 0.14545900  | 1.14519400  | 2.43708100  |
| C | -3.03834700 | 3.08051800  | -0.17841500 | F  | 1.40488000  | 1.39104700  | 2.88355700  |
| C | -0.77944300 | 2.89116900  | -1.08736300 | F  | -0.55504400 | 0.71367400  | 3.52271200  |
| C | -2.70337500 | 4.32661900  | 0.36033200  | F  | -0.38728600 | 2.34829300  | 2.11047500  |

Zero-point correction= 1.318762 (Hartree/Particle)  
 Thermal correction to Energy= 1.405043  
 Thermal correction to Enthalpy= 1.405987  
 Thermal correction to Gibbs Free Energy= 1.188620  
 Sum of electronic and zero-point Energies= -8379.362146  
 Sum of electronic and thermal Energies= -8379.275865  
 Sum of electronic and thermal Enthalpies= -8379.274921  
 Sum of electronic and thermal Free Energies= -8379.492288  
 CPCM (Benzene) PBE0-D3/def2TZVP E = -11343.6870853  
 CPCM (Benzene) M06L/def2TZVP E = -11347.7701324

### TS-OA-bis-SeCF<sub>3</sub>-PhI singlet

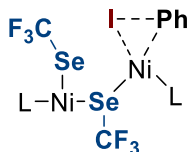

|    |             |             |             |   |             |             |             |
|----|-------------|-------------|-------------|---|-------------|-------------|-------------|
| Ni | 1.79506400  | -0.23516300 | -0.15937900 | H | -3.76336400 | -5.67551600 | -0.86567500 |
| Ni | -1.57027700 | -0.13538400 | -0.20234800 | H | -3.20704500 | -4.73813300 | 3.25842700  |
| C  | 3.35115600  | 0.93590100  | 0.21747300  | H | -3.29526100 | -6.40514000 | 1.44718500  |
| C  | 5.47137500  | 1.86169600  | 0.76751600  | C | -3.86088400 | 2.35982700  | 0.66617700  |
| C  | 4.54963400  | 2.98557800  | 0.31832300  | C | -3.58774600 | 2.79928700  | 1.98815800  |
| C  | -3.38603400 | -0.13135700 | 0.33121000  | C | -4.01515200 | 3.30225300  | -0.37986400 |
| C  | -5.61778500 | 0.59730200  | 0.60539100  | C | -3.45521900 | 4.17404600  | 2.22391300  |
| C  | -5.61451300 | -0.88384700 | 0.24286300  | C | -3.88488600 | 4.66525900  | -0.08113500 |
| N  | 3.24686300  | 2.29482800  | 0.22450700  | C | -3.60983400 | 5.10686500  | 1.20614200  |
| N  | 4.67085600  | 0.65533200  | 0.44854600  | H | -3.25472500 | 4.51779600  | 3.23403000  |
| N  | -4.18587300 | -1.24056200 | 0.40367000  | H | -4.01678400 | 5.39203400  | -0.87714500 |
| N  | -4.19344200 | 0.96620200  | 0.42687200  | H | -3.52491200 | 6.17000600  | 1.41748200  |
| H  | 4.82935900  | 3.38921600  | -0.66188700 | C | 1.80286700  | 3.75321400  | 2.53855600  |
| H  | 6.42377800  | 1.85047000  | 0.23720400  | H | 0.84240300  | 3.75995800  | 3.07066700  |
| H  | -5.91738900 | -1.04438700 | -0.79766300 | C | 2.49054400  | 5.09781500  | 2.87435200  |
| H  | -6.25255600 | 1.19423300  | -0.05285000 | H | 2.65651600  | 5.18145400  | 3.95533800  |
| C  | 2.07643100  | 3.09951800  | -0.03091400 | H | 3.46672900  | 5.18436300  | 2.38143100  |
| C  | 1.41175200  | 3.72849600  | 1.04937100  | H | 1.88454000  | 5.95138600  | 2.55402100  |
| C  | 1.67491200  | 3.32908600  | -1.37305200 | C | 2.59900000  | 2.59196200  | 3.15002500  |
| C  | 0.28432900  | 4.50918400  | 0.74886900  | H | 3.64388300  | 2.57761700  | 2.82888200  |
| C  | 0.55401700  | 4.13322000  | -1.60484600 | H | 2.60345900  | 2.71229500  | 4.24071400  |
| C  | -0.15012900 | 4.70806000  | -0.55363600 | H | 2.15080400  | 1.62445300  | 2.92394600  |
| H  | -0.26707900 | 4.96481100  | 1.56722900  | C | 4.75017600  | -0.86770600 | 3.00327600  |
| H  | 0.22549900  | 4.30621500  | -2.62418000 | H | 3.99923800  | -0.11615100 | 2.74747900  |
| H  | -1.03512300 | 5.30596900  | -0.74677900 | C | 5.80720600  | -0.20794600 | 3.91838700  |
| C  | 5.35482900  | -0.61423500 | 0.49880900  | H | 6.55835600  | -0.94253800 | 4.23351400  |
| C  | 6.09808800  | -1.03175300 | -0.63696000 | H | 6.33976400  | 0.60918600  | 3.42027900  |
| C  | 5.39832100  | -1.35127000 | 1.70832500  | H | 5.33221900  | 0.19603200  | 4.82025000  |
| C  | 6.80411100  | -2.23917800 | -0.55986100 | C | 4.03426900  | -1.98860000 | 3.77989700  |
| C  | 6.12795500  | -2.54792000 | 1.72683300  | H | 3.31049200  | -2.51442100 | 3.15290600  |
| C  | 6.81262900  | -2.99985200 | 0.60416200  | H | 4.74412100  | -2.72124700 | 4.18172800  |
| H  | 7.36559700  | -2.58227100 | -1.42324200 | H | 3.49338400  | -1.56123200 | 4.63015000  |
| H  | 6.16700900  | -3.13065200 | 2.64162000  | C | 6.23300500  | -0.19125600 | -1.90680900 |
| H  | 7.36679400  | -3.93412400 | 0.64166000  | H | 5.44696900  | 0.57047300  | -1.89046400 |
| C  | -3.83764500 | -2.62771000 | 0.65425700  | C | 7.60527500  | 0.52109000  | -1.94663000 |
| C  | -3.90565000 | -3.58464600 | -0.38802300 | H | 7.79646100  | 1.12673300  | -1.05494000 |
| C  | -3.60470400 | -3.04498000 | 1.99567400  | H | 8.41644700  | -0.21315500 | -2.01831100 |
| C  | -3.70479200 | -4.93703500 | -0.07254900 | H | 7.66954100  | 1.17765700  | -2.82252900 |
| C  | -3.39623900 | -4.40673100 | 2.24409000  | C | 6.06620800  | -1.00619900 | -3.20439700 |
| C  | -3.44641700 | -5.35163200 | 1.22539900  | H | 5.14637500  | -1.59445200 | -3.19826100 |

|   |             |             |             |    |             |             |             |
|---|-------------|-------------|-------------|----|-------------|-------------|-------------|
| H | 6.03305700  | -0.32824000 | -4.06556600 | H  | -3.34045300 | 4.61008700  | -2.78378300 |
| H | 6.90892100  | -1.68857000 | -3.36509300 | H  | -2.33290300 | 3.15490500  | -2.60348300 |
| C | 2.45235600  | 2.80766200  | -2.58001400 | H  | -3.60296000 | 3.21014400  | -3.83171700 |
| C | 3.08106700  | 1.97610100  | -2.24831600 | C  | -3.49367300 | 1.87205500  | 3.19469800  |
| C | 3.37277200  | 3.91092200  | -3.15071400 | H  | -3.45596000 | 0.84380100  | 2.83101300  |
| H | 3.96797700  | 3.51979400  | -3.98497600 | C  | -4.73382400 | 2.01799200  | 4.10341600  |
| H | 2.77753100  | 4.75061800  | -3.52883100 | H  | -5.66804900 | 1.83120600  | 3.56256800  |
| H | 4.06226800  | 4.31275200  | -2.40033300 | H  | -4.68014600 | 1.31233500  | 4.94089100  |
| C | 1.53879300  | 2.27911500  | -3.70379500 | H  | -4.79462700 | 3.02946100  | 4.52267000  |
| H | 2.14144500  | 1.75806500  | -4.45802400 | C  | -2.21253900 | 2.11298200  | 4.01563800  |
| H | 0.77783800  | 1.58794700  | -3.33106100 | H  | -1.32290600 | 2.02165000  | 3.38777000  |
| H | 1.02386500  | 3.09740200  | -4.22127900 | H  | -2.21226000 | 3.10624700  | 4.47960300  |
| C | -3.64687800 | -2.09308500 | 3.19047900  | C  | -2.13598300 | 1.37516600  | 4.82127600  |
| H | -3.24204500 | -1.13202500 | 2.86599300  | I  | 2.20369400  | -1.23266200 | -2.57278200 |
| C | -5.09664900 | -1.87511300 | 3.67775600  | C  | 1.67452200  | -2.45379700 | -0.74888800 |
| H | -5.73838200 | -1.43102100 | 2.91256500  | C  | 2.74145200  | -2.98500600 | -0.01556800 |
| H | -5.54671700 | -2.82952700 | 3.97691900  | C  | 0.40652000  | -3.05236200 | -0.72723500 |
| H | -5.11026200 | -1.20972300 | 4.54914100  | C  | 2.50345200  | -4.08060900 | 0.82391100  |
| C | -2.79628000 | -2.56184300 | 4.38628400  | H  | 3.73780200  | -2.57612700 | -0.11124100 |
| H | -1.78608600 | -2.84351900 | 4.08270500  | C  | 0.19350900  | -4.14439900 | 0.11110300  |
| H | -2.71418100 | -1.74984700 | 5.11636200  | H  | -0.39486300 | -2.66170900 | -1.34388600 |
| H | -3.25632200 | -3.41301700 | 4.90244000  | C  | 1.23719800  | -4.65942100 | 0.88852500  |
| C | -4.24821900 | -3.24384700 | -1.83231000 | H  | 3.32822800  | -4.48881400 | 1.40186600  |
| H | -4.17003300 | -2.16534400 | -1.95146700 | H  | -0.79582900 | -4.59018100 | 0.15339700  |
| C | -5.69796100 | -3.66049500 | -2.16630100 | H  | 1.06355300  | -5.52017400 | 1.52873900  |
| H | -5.95937500 | -3.33621300 | -3.18039100 | H  | 5.67986300  | 1.89407100  | 1.84285500  |
| H | -5.81559400 | -4.75025900 | -2.12082100 | H  | 4.50176200  | 3.81422400  | 1.02750100  |
| H | -6.42489900 | -3.22384700 | -1.47214200 | H  | -6.24787200 | -1.49505300 | 0.88836300  |
| C | -3.27525200 | -3.88850400 | -2.83834100 | H  | -5.92518600 | 0.78001600  | 1.64278300  |
| H | -3.52828000 | -3.57095000 | -3.85279400 | Se | -1.50813900 | -0.34906300 | -2.54480600 |
| H | -2.24469900 | -3.57836000 | -2.64460400 | C  | -3.16120100 | -0.19549800 | -3.57544900 |
| H | -3.32189300 | -4.98319500 | -2.81101000 | F  | -4.31494300 | -0.14800400 | -2.83326000 |
| C | -4.35541200 | 2.92087200  | -1.81333800 | F  | -3.32432000 | -1.23568800 | -4.42967400 |
| H | -4.30014700 | 1.83723100  | -1.89582600 | F  | -3.18277700 | 0.91297400  | -4.35380800 |
| C | -5.79074300 | 3.35073500  | -2.18492700 | Se | 0.06547900  | 0.46861800  | 1.23761500  |
| H | -5.89768300 | 4.44250600  | -2.17523400 | C  | 0.19473200  | -0.81075800 | 2.73484200  |
| H | -6.03994500 | 2.99852200  | -3.19259700 | F  | -0.73813400 | -0.52630100 | 3.67455800  |
| H | -6.53574900 | 2.94336700  | -1.49100900 | F  | 1.39804700  | -0.70626100 | 3.35094300  |
| C | -3.34467100 | 3.51383900  | -2.81430200 | F  | 0.03459600  | -2.10598200 | 2.40629900  |

Zero-point correction= 1.320601 (Hartree/Particle)  
 Thermal correction to Energy= 1.406037  
 Thermal correction to Enthalpy= 1.406981  
 Thermal correction to Gibbs Free Energy= 1.194350  
 Sum of electronic and zero-point Energies= -8379.299931  
 Sum of electronic and thermal Energies= -8379.214494  
 Sum of electronic and thermal Enthalpies= -8379.213550  
 Sum of electronic and thermal Free Energies= -8379.426182  
 CPCM (Benzene) PBE0-D3/def2TZVP E = -11343.6372255  
 CPCM (Benzene) M06L/def2TZVP E = -11347.756106

### post-OA-bis-SeCF<sub>3</sub> triplet

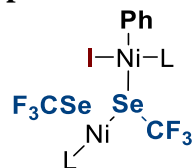

|    |                 |                 |                 |   |                 |                 |                 |
|----|-----------------|-----------------|-----------------|---|-----------------|-----------------|-----------------|
| Ni | -1.897629000000 | 0.281464000000  | -0.473776000000 | C | 0.054514000000  | -4.561544000000 | -0.103821000000 |
| Ni | 2.198231000000  | 0.003058000000  | -0.476067000000 | H | 0.509445000000  | -4.347600000000 | 1.977248000000  |
| C  | -3.464399000000 | -0.814221000000 | 0.479064000000  | H | -0.663196000000 | -4.650369000000 | -2.117674000000 |
| C  | -5.459538000000 | -1.580097000000 | 1.491442000000  | H | 0.954699000000  | -5.128627000000 | -0.319539000000 |
| C  | -4.599324000000 | -2.783700000000 | 1.127692000000  | C | -5.368212000000 | 0.833956000000  | 0.869547000000  |
| C  | 3.865115000000  | 0.468757000000  | 0.454851000000  | C | -6.328874000000 | 1.117904000000  | -0.135746000000 |
| C  | 5.736825000000  | 0.382384000000  | 1.898193000000  | C | -5.157124000000 | 1.724307000000  | 1.951917000000  |
| C  | 5.873083000000  | 1.600473000000  | 0.990297000000  | C | -7.012075000000 | 2.338723000000  | -0.067984000000 |
| N  | -3.337467000000 | -2.145005000000 | 0.692163000000  | C | -5.876386000000 | 2.927101000000  | 1.967375000000  |
| N  | -4.716706000000 | -0.457339000000 | 0.864536000000  | C | -6.787079000000 | 3.241131000000  | 0.965385000000  |
| N  | 4.542355000000  | 1.643900000000  | 0.344168000000  | H | -7.740674000000 | 2.580736000000  | -0.835157000000 |
| N  | 4.597891000000  | -0.330912000000 | 1.276563000000  | H | -5.721366000000 | 3.624785000000  | 2.783997000000  |
| H  | -5.022173000000 | -3.364457000000 | 0.301581000000  | H | -7.331109000000 | 4.181527000000  | 0.996746000000  |
| H  | -6.471754000000 | -1.642077000000 | 1.092411000000  | C | 4.229933000000  | 2.740666000000  | -0.538041000000 |
| H  | 6.652188000000  | 1.470714000000  | 0.227741000000  | C | 4.528201000000  | 2.639479000000  | -0.918751000000 |
| H  | 6.628539000000  | -0.246407000000 | 1.927076000000  | C | 3.730330000000  | 3.940918000000  | 0.021275000000  |
| C  | -2.185796000000 | -2.983093000000 | 0.430975000000  | C | 4.250479000000  | 3.744874000000  | -2.733406000000 |
| C  | -1.321844000000 | -3.334338000000 | 1.496460000000  | C | 3.486256000000  | 5.018950000000  | -0.838939000000 |
| C  | -1.996073000000 | -3.510574000000 | -0.874445000000 | C | 3.730754000000  | 4.922230000000  | -2.205489000000 |
| C  | -0.193904000000 | -4.108957000000 | 1.183454000000  | H | 4.460073000000  | 3.685160000000  | -3.796971000000 |
| C  | -0.854996000000 | -4.282821000000 | -1.116246000000 | H | 3.101853000000  | 5.948698000000  | -0.429958000000 |

|   |                 |                 |                 |    |                 |                 |                 |
|---|-----------------|-----------------|-----------------|----|-----------------|-----------------|-----------------|
| H | 3.530763000000  | 5.769179000000  | -2.857009000000 | H  | 1.967876000000  | 4.721995000000  | 2.932740000000  |
| C | 4.335456000000  | -1.703118000000 | 1.633564000000  | H  | 2.078910000000  | 5.790348000000  | 1.531083000000  |
| C | 3.756072000000  | -1.993489000000 | 2.888829000000  | C  | 5.217918000000  | 1.425723000000  | -2.537714000000 |
| C | 4.770969000000  | -2.736028000000 | 0.763239000000  | H  | 5.183197000000  | 0.606921000000  | -1.813359000000 |
| C | 3.608893000000  | -3.338247000000 | 3.256344000000  | C  | 6.704012000000  | 1.742368000000  | -2.818084000000 |
| C | 4.586507000000  | -4.060093000000 | 1.178005000000  | H  | 7.218291000000  | 0.853005000000  | -3.201761000000 |
| C | 4.015882000000  | -4.363635000000 | 2.411659000000  | H  | 6.799384000000  | 2.534910000000  | -3.569932000000 |
| H | 3.171792000000  | -3.580808000000 | 4.220941000000  | H  | 7.231435000000  | 2.079556000000  | -1.918106000000 |
| H | 4.900175000000  | -4.869631000000 | 0.528254000000  | C  | 4.529558000000  | 0.922942000000  | -3.819730000000 |
| H | 3.894991000000  | -5.400965000000 | 2.713872000000  | H  | 5.021263000000  | 0.007992000000  | -4.169759000000 |
| C | -1.499101000000 | -3.080663000000 | 3.003036000000  | H  | 3.476477000000  | 0.689510000000  | -3.641463000000 |
| H | -0.476046000000 | -2.969839000000 | 3.382976000000  | H  | 4.593914000000  | 1.659143000000  | -4.629999000000 |
| C | -2.074876000000 | -4.349091000000 | 3.676347000000  | C  | 5.466804000000  | -2.449918000000 | -0.569132000000 |
| H | -2.087710000000 | -4.229280000000 | 4.766600000000  | H  | 5.023294000000  | -1.539054000000 | -0.983638000000 |
| H | -3.104508000000 | -4.545266000000 | 3.352117000000  | C  | 6.978620000000  | -2.200972000000 | -0.371668000000 |
| H | -1.480685000000 | -5.236678000000 | 3.436441000000  | H  | 7.461037000000  | -3.085412000000 | 0.062217000000  |
| C | -2.252232000000 | -1.837843000000 | 3.492289000000  | H  | 7.457445000000  | -1.996429000000 | -1.336777000000 |
| H | -3.332459000000 | -1.906972000000 | 3.337862000000  | H  | 7.185348000000  | -1.353266000000 | 0.287408000000  |
| H | -2.092907000000 | -1.735861000000 | 4.572884000000  | C  | 5.280845000000  | -3.559905000000 | -1.619029000000 |
| H | -1.880769000000 | -0.930036000000 | 3.017505000000  | H  | 5.846862000000  | -4.463169000000 | -1.359870000000 |
| C | -4.230021000000 | 1.415803000000  | 3.124760000000  | H  | 4.230943000000  | -3.825569000000 | -1.746727000000 |
| H | -3.570559000000 | 0.595503000000  | 2.832553000000  | H  | 5.656165000000  | -3.210149000000 | -2.586763000000 |
| C | -5.046326000000 | 0.957633000000  | 4.353931000000  | C  | 3.314489000000  | -0.910304000000 | 3.869190000000  |
| H | -5.694880000000 | 1.766237000000  | 4.712308000000  | H  | 3.344179000000  | 0.051181000000  | 3.349796000000  |
| H | -5.688429000000 | 0.098766000000  | 4.130107000000  | C  | 4.261947000000  | -0.838713000000 | 5.085648000000  |
| H | -4.375126000000 | 0.675811000000  | 5.173559000000  | H  | 5.303743000000  | -0.674029000000 | 4.788147000000  |
| C | -3.333313000000 | 2.605789000000  | 3.515181000000  | H  | 3.965572000000  | -0.022467000000 | 5.755519000000  |
| H | -2.767835000000 | 2.983520000000  | 2.660330000000  | H  | 4.230506000000  | -1.771381000000 | 5.661660000000  |
| H | -3.918300000000 | 3.432405000000  | 3.935350000000  | C  | 1.861698000000  | -1.108077000000 | 4.337461000000  |
| H | -2.614349000000 | 2.291679000000  | 4.277506000000  | H  | 1.186675000000  | -1.187461000000 | 3.481355000000  |
| C | -6.710342000000 | 0.136231000000  | -1.243330000000 | H  | 1.752153000000  | -2.010765000000 | 4.950446000000  |
| H | -5.934942000000 | -0.634512000000 | -1.295321000000 | H  | 1.539352000000  | -0.253964000000 | 4.942674000000  |
| C | -8.064452000000 | -0.543218000000 | -0.932465000000 | I  | -2.957425000000 | 0.516023000000  | -2.813425000000 |
| H | -8.081086000000 | -1.039262000000 | 0.043819000000  | C  | -1.743502000000 | 2.255658000000  | -0.806212000000 |
| H | -8.873886000000 | 0.196454000000  | -0.931754000000 | C  | -2.737298000000 | 3.086489000000  | -0.298316000000 |
| H | -8.297840000000 | -1.293365000000 | -1.697313000000 | C  | -0.569747000000 | 2.775114000000  | -1.354513000000 |
| C | -6.797719000000 | 0.797336000000  | -2.633132000000 | C  | -2.496689000000 | 4.465276000000  | -0.225494000000 |
| H | -5.895342000000 | 1.366161000000  | -2.865242000000 | H  | -3.682986000000 | 2.686186000000  | 0.042484000000  |
| H | -6.919543000000 | 0.025549000000  | -3.402008000000 | C  | -0.347929000000 | 4.153164000000  | -1.285983000000 |
| H | -7.661951000000 | 1.467693000000  | -2.708282000000 | H  | 0.174883000000  | 2.132556000000  | -1.811491000000 |
| C | -3.025009000000 | -3.368419000000 | -1.995515000000 | C  | -1.305449000000 | 4.998386000000  | -0.716333000000 |
| H | -3.652725000000 | -2.497105000000 | -1.785303000000 | H  | -3.261580000000 | 5.113882000000  | 0.194628000000  |
| C | -3.933771000000 | -4.619631000000 | -2.039905000000 | H  | 0.579812000000  | 4.556429000000  | -1.682479000000 |
| H | -4.712199000000 | -4.499477000000 | -2.803351000000 | H  | -1.130874000000 | 6.070470000000  | -0.677235000000 |
| H | -3.346872000000 | -5.509587000000 | -2.296126000000 | H  | -5.526639000000 | -1.415726000000 | 2.572337000000  |
| H | -4.424657000000 | -4.820685000000 | -1.081457000000 | H  | -4.419791000000 | -3.458742000000 | 1.966542000000  |
| C | -2.393903000000 | -3.159203000000 | -3.385593000000 | H  | 6.076434000000  | 2.522097000000  | 1.537803000000  |
| H | -3.169679000000 | -2.863760000000 | -4.101035000000 | H  | 5.484897000000  | 0.667625000000  | 2.926583000000  |
| H | -1.624962000000 | -2.384386000000 | -3.376015000000 | Se | 1.071763000000  | -0.532285000000 | -2.500446000000 |
| H | -1.939901000000 | -4.083100000000 | -3.762660000000 | C  | 1.821700000000  | -2.272930000000 | -2.942882000000 |
| C | 3.504939000000  | 4.122630000000  | 1.520307000000  | F  | 3.017896000000  | -2.189177000000 | -3.583016000000 |
| H | 3.531017000000  | 3.132938000000  | 1.985547000000  | F  | 1.007563000000  | -2.985550000000 | -3.761247000000 |
| C | 4.625541000000  | 4.983216000000  | 2.145010000000  | F  | 2.044016000000  | -3.064871000000 | -1.854189000000 |
| H | 5.623655000000  | 4.572502000000  | 1.955724000000  | Se | 0.133353000000  | -0.003552000000 | 0.959453000000  |
| H | 4.610000000000  | 5.999706000000  | 1.733638000000  | C  | 0.155478000000  | 1.410292000000  | 2.322395000000  |
| H | 4.490223000000  | 5.059742000000  | 3.230699000000  | F  | 1.425986000000  | 1.665544000000  | 2.729205000000  |
| C | 2.134733000000  | 4.742453000000  | 1.849521000000  | F  | -0.530240000000 | 1.057666000000  | 3.442947000000  |
| H | 1.319200000000  | 4.197544000000  | 1.372217000000  | F  | -0.366073000000 | 2.585921000000  | 1.918169000000  |

Zero-point correction= 1.319050 (Hartree/Particle)  
Thermal correction to Energy= 1.406180  
Thermal correction to Enthalpy= 1.407124  
Thermal correction to Gibbs Free Energy= 1.186984  
Sum of electronic and zero-point Energies= -8379.365846  
Sum of electronic and thermal Energies= -8379.278716  
Sum of electronic and thermal Enthalpies= -8379.277772  
Sum of electronic and thermal Free Energies= -8379.497912  
CPCM (Benzene) PBE0-D3/def2TZVP E = -11343.6862555  
CPCM (Benzene) M06L/def2TZVP E = -11347.7753004



F 0.11863600 1.51303600 2.85765700  
 Se 1.49720900 -0.06753500 -2.70163700  
 C 1.40497000 1.76955000 -3.41084900

F 1.94737700 2.70107700 -2.59638500  
 F 0.14126500 2.13558300 -3.65994700  
 F 2.08783700 1.82644200 -4.57751800

Zero-point correction= 1.321202 (Hartree/Particle)  
 Thermal correction to Energy= 1.407388  
 Thermal correction to Enthalpy= 1.408332  
 Thermal correction to Gibbs Free Energy= 1.194012  
 Sum of electronic and zero-point Energies= -8379.342712  
 Sum of electronic and thermal Energies= -8379.256526  
 Sum of electronic and thermal Enthalpies= -8379.255582  
 Sum of electronic and thermal Free Energies= -8379.469902  
 CPCM (Benzene) PBE0-D3/def2TZVP E = -11343.6724422  
 CPCM (Benzene) M06L/def2TZVP E = -11347.7794373

**pre-RE-bis-SeCF<sub>3</sub> triplet**

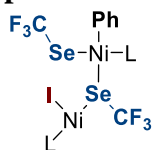

|    |                 |                 |                 |   |                 |                 |                 |
|----|-----------------|-----------------|-----------------|---|-----------------|-----------------|-----------------|
| Ni | 2.092383000000  | -0.501098000000 | 0.089118000000  | H | 2.736607000000  | 5.733373000000  | 1.187639000000  |
| Ni | -2.121085000000 | -0.099615000000 | -0.507842000000 | H | 1.095819000000  | 6.339424000000  | 0.941072000000  |
| C  | 3.303183000000  | 1.199051000000  | 0.207028000000  | C | 1.934564000000  | 3.320713000000  | 2.472258000000  |
| C  | 5.258470000000  | 2.392662000000  | 0.788546000000  | H | 3.015987000000  | 3.330535000000  | 2.309672000000  |
| C  | 4.350565000000  | 3.294186000000  | -0.047151000000 | H | 1.763072000000  | 3.698625000000  | 3.487854000000  |
| C  | -3.833102000000 | -0.113407000000 | 0.464431000000  | H | 1.578145000000  | 2.290394000000  | 2.436872000000  |
| C  | -5.896425000000 | 0.627799000000  | 1.369870000000  | C | 4.025004000000  | 0.303641000000  | 3.533459000000  |
| C  | -5.786674000000 | -0.883071000000 | 1.563247000000  | H | 3.357087000000  | 0.913805000000  | 2.920546000000  |
| N  | 3.121450000000  | 2.476664000000  | -0.182508000000 | C | 4.824011000000  | 1.253864000000  | 4.452886000000  |
| N  | 4.558128000000  | 1.088217000000  | 0.712488000000  | H | 5.481055000000  | 0.684532000000  | 5.121502000000  |
| N  | -4.568722000000 | -1.211653000000 | 0.786848000000  | H | 5.455472000000  | 1.946988000000  | 3.886400000000  |
| N  | -4.550612000000 | 0.972264000000  | 0.861490000000  | H | 4.142367000000  | 1.846375000000  | 5.074107000000  |
| H  | 4.764815000000  | 3.499045000000  | -1.039430000000 | C | 3.139089000000  | -0.620412000000 | 4.390396000000  |
| H  | 6.268804000000  | 2.313220000000  | 0.385393000000  | H | 2.589098000000  | -1.340285000000 | 3.778732000000  |
| H  | -6.649913000000 | -1.435771000000 | 1.185625000000  | H | 3.728261000000  | -1.178192000000 | 5.127516000000  |
| H  | -6.657575000000 | 0.906250000000  | 0.630809000000  | H | 2.406715000000  | -0.023052000000 | 4.941340000000  |
| C  | 1.944691000000  | 3.063334000000  | -0.790039000000 | C | 6.541118000000  | -0.347382000000 | -0.952914000000 |
| C  | 1.028268000000  | 3.782735000000  | 0.013365000000  | H | 5.766250000000  | 0.332475000000  | -1.320727000000 |
| C  | 1.777138000000  | 2.970526000000  | -2.196034000000 | C | 7.896587000000  | 0.395343000000  | -0.969571000000 |
| C  | -0.124299000000 | 4.281319000000  | -0.613512000000 | H | 7.914446000000  | 1.262813000000  | -0.300636000000 |
| C  | 0.611585000000  | 3.500337000000  | -2.760004000000 | H | 8.706754000000  | -0.272774000000 | -0.654090000000 |
| C  | -0.347489000000 | 4.127253000000  | -1.974546000000 | H | 8.127138000000  | 0.744498000000  | -1.982988000000 |
| H  | -0.864355000000 | 4.796881000000  | -0.007874000000 | C | 6.607226000000  | -1.536954000000 | -1.931259000000 |
| H  | 0.448270000000  | 3.408863000000  | -3.827879000000 | H | 5.696408000000  | -2.138240000000 | -1.895535000000 |
| H  | -1.262927000000 | 4.503101000000  | -2.422294000000 | H | 6.729087000000  | -1.166568000000 | -2.955583000000 |
| C  | 5.206887000000  | -0.083998000000 | 1.259127000000  | H | 7.462493000000  | -2.188486000000 | -1.717800000000 |
| C  | 6.166406000000  | -0.766468000000 | 0.467361000000  | C | 2.854669000000  | 2.428097000000  | -3.133467000000 |
| C  | 4.965214000000  | -0.460194000000 | 2.604040000000  | H | 3.525069000000  | 1.784284000000  | -2.555060000000 |
| C  | 6.839761000000  | -1.852573000000 | 1.039367000000  | C | 3.691797000000  | 3.594563000000  | -3.709011000000 |
| C  | 5.671741000000  | -1.555378000000 | 3.119742000000  | H | 4.507123000000  | 3.208472000000  | -4.332943000000 |
| C  | 6.595877000000  | -2.250756000000 | 2.349063000000  | H | 3.066550000000  | 4.240658000000  | -4.336559000000 |
| H  | 7.570453000000  | -2.393579000000 | 0.446746000000  | H | 4.128624000000  | 4.226617000000  | -2.927902000000 |
| H  | 5.497689000000  | -1.861459000000 | 4.146054000000  | C | 2.296309000000  | 1.585315000000  | -4.295640000000 |
| H  | 7.131625000000  | -3.097103000000 | 2.770748000000  | H | 3.119856000000  | 1.081470000000  | -4.814592000000 |
| C  | -4.302065000000 | -2.587792000000 | 0.442472000000  | H | 1.592972000000  | 0.826382000000  | -3.946587000000 |
| C  | -4.562661000000 | -3.031171000000 | -0.880754000000 | H | 1.783775000000  | 2.211867000000  | -5.034848000000 |
| C  | -3.904960000000 | -3.491200000000 | 1.455549000000  | C | -3.654210000000 | -3.070340000000 | 2.901766000000  |
| C  | -4.380867000000 | -4.390463000000 | -1.161726000000 | H | -3.599908000000 | -1.978628000000 | 2.931624000000  |
| C  | -3.761255000000 | -4.844273000000 | 1.118446000000  | C | -4.802930000000 | -3.535182000000 | 3.823911000000  |
| C  | -3.990049000000 | -5.292829000000 | -0.176149000000 | H | -5.781365000000 | -3.173727000000 | 3.489148000000  |
| H  | -4.556649000000 | -4.753273000000 | -2.167992000000 | H | -4.854250000000 | -4.630182000000 | 3.854268000000  |
| H  | -3.459799000000 | -5.552620000000 | 1.884426000000  | H | -4.640374000000 | -3.180581000000 | 4.849082000000  |
| H  | -3.868226000000 | -6.345194000000 | -0.420013000000 | C | -2.312105000000 | -3.597691000000 | 3.443953000000  |
| C  | -4.244188000000 | 2.363465000000  | 0.643987000000  | H | -1.485042000000 | -3.364096000000 | 2.771698000000  |
| C  | -3.730404000000 | 3.120554000000  | 1.722425000000  | H | -2.099546000000 | -3.143130000000 | 4.418571000000  |
| C  | -4.592204000000 | 2.975341000000  | -0.584301000000 | H | -2.335773000000 | -4.684222000000 | 3.588765000000  |
| C  | -3.533826000000 | 4.494445000000  | 1.534142000000  | C | -5.084012000000 | -2.099642000000 | -1.976864000000 |
| C  | -4.368844000000 | 4.352025000000  | -0.719439000000 | H | -4.619909000000 | -1.119767000000 | -1.831698000000 |
| C  | -3.844492000000 | 5.108094000000  | 0.324307000000  | C | -6.616546000000 | -1.932760000000 | -1.878895000000 |
| H  | -3.144480000000 | 5.093235000000  | 2.352743000000  | H | -6.976485000000 | -1.262504000000 | -2.668846000000 |
| H  | -4.629654000000 | 4.841754000000  | -1.653014000000 | H | -7.120393000000 | -2.899246000000 | -2.002965000000 |
| H  | -3.692634000000 | 6.177482000000  | 0.199614000000  | H | -6.933960000000 | -1.514370000000 | -0.918731000000 |
| C  | 1.172495000000  | 4.211406000000  | 1.483243000000  | C | -4.712621000000 | -2.549819000000 | -3.399918000000 |
| H  | 0.142586000000  | 4.246465000000  | 1.858721000000  | H | -4.978663000000 | -1.759957000000 | -4.110475000000 |
| C  | 1.703614000000  | 5.662727000000  | 1.550320000000  | H | -3.638858000000 | -2.729702000000 | -3.497232000000 |
| H  | 1.690212000000  | 6.026522000000  | 2.585080000000  | H | -5.256305000000 | -3.454290000000 | -3.700492000000 |



|   |                 |                 |                 |    |                 |                 |                 |
|---|-----------------|-----------------|-----------------|----|-----------------|-----------------|-----------------|
| C | -5.270904000000 | 2.224351000000  | -1.727185000000 | C  | 2.151394000000  | -4.316329000000 | 1.537371000000  |
| H | -5.208283000000 | 1.153150000000  | -1.515035000000 | H  | 3.421450000000  | -2.589010000000 | 1.364982000000  |
| C | -6.765455000000 | 2.606944000000  | -1.813975000000 | C  | 0.073804000000  | -4.237623000000 | 0.303637000000  |
| H | -6.883660000000 | 3.665258000000  | -2.076487000000 | H  | -0.321653000000 | -2.419450000000 | -0.787173000000 |
| H | -7.266590000000 | 2.012752000000  | -2.587326000000 | C  | 0.958583000000  | -4.921548000000 | 1.144209000000  |
| H | -7.291803000000 | 2.444654000000  | -0.866266000000 | H  | 2.856873000000  | -4.848100000000 | 2.171702000000  |
| C | -4.587576000000 | 2.455300000000  | -3.087507000000 | H  | -0.855286000000 | -4.704843000000 | -0.011817000000 |
| H | -4.665699000000 | 3.501371000000  | -3.408040000000 | H  | 0.724010000000  | -5.929399000000 | 1.477609000000  |
| H | -3.532494000000 | 2.172265000000  | -3.058155000000 | H  | 5.330591000000  | 2.713093000000  | 1.833765000000  |
| H | -5.073495000000 | 1.841939000000  | -3.855186000000 | H  | 4.126111000000  | 4.247397000000  | 0.435043000000  |
| C | -3.435245000000 | 2.509426000000  | 3.088717000000  | H  | -5.645509000000 | -1.147689000000 | 2.616108000000  |
| H | -3.513023000000 | 1.423355000000  | 2.994389000000  | H  | -6.110359000000 | 1.162258000000  | 2.298672000000  |
| C | -4.464149000000 | 2.975359000000  | 4.140565000000  | Se | -0.096676000000 | 0.408843000000  | 0.850165000000  |
| H | -5.492946000000 | 2.748819000000  | 3.837766000000  | C  | -0.337619000000 | -0.326296000000 | 2.660423000000  |
| H | -4.277590000000 | 2.483954000000  | 5.103059000000  | F  | -1.649856000000 | -0.368026000000 | 2.999265000000  |
| H | -4.402066000000 | 4.058569000000  | 4.300758000000  | F  | 0.264767000000  | 0.461450000000  | 3.592918000000  |
| C | -2.006123000000 | 2.817927000000  | 3.568567000000  | F  | 0.156279000000  | -1.565496000000 | 2.843601000000  |
| H | -1.268241000000 | 2.522572000000  | 2.818334000000  | Se | 2.993286000000  | -0.991835000000 | -1.952096000000 |
| H | -1.873164000000 | 3.885983000000  | 3.780434000000  | C  | 2.697058000000  | -2.806022000000 | -2.677441000000 |
| H | -1.787466000000 | 2.267759000000  | 4.490301000000  | F  | 3.326244000000  | -2.830371000000 | -3.875312000000 |
| C | 1.552348000000  | -2.334888000000 | 0.283732000000  | F  | 1.415813000000  | -3.122819000000 | -2.887943000000 |
| C | 2.466027000000  | -3.026990000000 | 1.086684000000  | F  | 3.248788000000  | -3.775466000000 | -1.923283000000 |
| C | 0.367448000000  | -2.942685000000 | -0.131424000000 | I  | -1.468910000000 | -0.255171000000 | -3.004905000000 |

Zero-point correction= 1.320265 (Hartree/Particle)  
 Thermal correction to Energy= 1.406885  
 Thermal correction to Enthalpy= 1.407829  
 Thermal correction to Gibbs Free Energy= 1.190534  
 Sum of electronic and zero-point Energies= -8379.374073  
 Sum of electronic and thermal Energies= -8379.287453  
 Sum of electronic and thermal Enthalpies= -8379.286509  
 Sum of electronic and thermal Free Energies= -8379.503805  
 CPCM (Benzene) PBE0-D3/def2TZVP E = -11343.7009667  
 CPCM (Benzene) M06L/def2TZVP E = -11347.7997794

### pre-RE-bis-SeCF<sub>3</sub> singlet

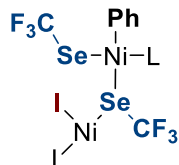

|    |                 |                 |                 |   |                 |                 |                 |
|----|-----------------|-----------------|-----------------|---|-----------------|-----------------|-----------------|
| Ni | 1.984549000000  | -0.511356000000 | 0.088884000000  | H | 5.325590000000  | -1.808527000000 | 4.346334000000  |
| Ni | -2.038961000000 | -0.204212000000 | -0.601787000000 | H | 6.987872000000  | -3.048676000000 | 3.006622000000  |
| C  | 3.142096000000  | 1.159669000000  | 0.255073000000  | C | -4.205899000000 | -2.557004000000 | 0.306668000000  |
| C  | 5.073922000000  | 2.344761000000  | 0.958638000000  | C | -4.540374000000 | -2.936533000000 | -1.019708000000 |
| C  | 4.245476000000  | 3.247660000000  | 0.049308000000  | C | -3.812202000000 | -3.514548000000 | 1.270582000000  |
| C  | -3.641789000000 | -0.099303000000 | 0.416942000000  | C | -4.393341000000 | -4.283425000000 | -1.371020000000 |
| C  | -5.682029000000 | 0.697617000000  | 1.272915000000  | C | -3.701806000000 | -4.850419000000 | 0.862213000000  |
| C  | -5.613041000000 | -0.810860000000 | 1.484246000000  | C | -3.973259000000 | -5.233241000000 | -0.445312000000 |
| N  | 3.018670000000  | -0.099303000000 | 0.416942000000  | H | -4.622864000000 | -4.597577000000 | -2.383321000000 |
| N  | 4.363054000000  | 1.051077000000  | 0.847364000000  | H | -3.392361000000 | -5.599454000000 | 1.583927000000  |
| N  | -4.405730000000 | -1.180155000000 | 0.709343000000  | H | -3.869587000000 | -6.273413000000 | -0.742409000000 |
| N  | -4.309096000000 | 1.013576000000  | 0.810161000000  | C | -3.993186000000 | 2.412263000000  | 0.618512000000  |
| H  | 4.737427000000  | 3.433602000000  | -0.910856000000 | C | -3.687224000000 | 3.185426000000  | 1.764107000000  |
| H  | 6.109865000000  | 2.245912000000  | 0.631545000000  | C | -4.174434000000 | 3.016999000000  | -0.649499000000 |
| H  | -6.488661000000 | -1.345828000000 | 1.112298000000  | C | -3.534579000000 | 4.568693000000  | 1.609758000000  |
| H  | -6.401913000000 | 0.986966000000  | 0.497873000000  | C | -4.009401000000 | 4.405480000000  | -0.742108000000 |
| C  | 1.902730000000  | 3.067916000000  | -0.836404000000 | C | -3.695219000000 | 5.178723000000  | 0.370276000000  |
| C  | 0.929299000000  | 3.765228000000  | -0.082261000000 | H | -3.301309000000 | 5.176695000000  | 2.479141000000  |
| C  | 1.862860000000  | 3.065476000000  | -2.256637000000 | H | -4.148895000000 | 4.890348000000  | -1.703167000000 |
| C  | -0.153437000000 | 4.325647000000  | -0.778840000000 | H | -3.585681000000 | 6.255804000000  | 0.272536000000  |
| C  | 0.771505000000  | 3.667835000000  | -2.892089000000 | C | 0.948223000000  | 4.123940000000  | 1.413894000000  |
| C  | -0.246203000000 | 4.269850000000  | -2.161898000000 | H | -0.105888000000 | 4.092488000000  | 1.716957000000  |
| H  | -0.933423000000 | 4.824929000000  | -0.211334000000 | C | 1.408244000000  | 5.592119000000  | 1.580243000000  |
| H  | 0.718420000000  | 3.661884000000  | -3.975634000000 | H | 1.317244000000  | 5.904316000000  | 2.627966000000  |
| H  | -1.098679000000 | 4.711960000000  | -2.670258000000 | H | 2.458180000000  | 5.716265000000  | 1.286653000000  |
| C  | 5.007965000000  | -0.113719000000 | 1.411868000000  | H | 0.812397000000  | 6.274841000000  | 0.966212000000  |
| C  | 5.981060000000  | -0.799294000000 | 0.639945000000  | C | 1.696647000000  | 3.237100000000  | 2.415585000000  |
| C  | 4.770292000000  | -0.461894000000 | 2.763705000000  | H | 2.782488000000  | 3.345334000000  | 2.346101000000  |
| C  | 6.671897000000  | -1.858370000000 | 1.241367000000  | H | 1.412051000000  | 3.538442000000  | 3.431333000000  |
| C  | 5.497831000000  | -1.526185000000 | 3.312359000000  | H | 1.439002000000  | 2.184861000000  | 2.298715000000  |
| C  | 6.436474000000  | -2.224217000000 | 2.562016000000  | C | 3.794174000000  | 0.291428000000  | 3.662556000000  |
| H  | 7.411139000000  | -2.403090000000 | 0.662686000000  | H | 3.167499000000  | 0.921993000000  | 3.027851000000  |

|   |                 |                 |                 |    |                 |                 |                 |
|---|-----------------|-----------------|-----------------|----|-----------------|-----------------|-----------------|
| C | 4.549988000000  | 1.212116000000  | 4.644989000000  | H  | -5.183327000000 | -3.174403000000 | -3.875038000000 |
| H | 5.173838000000  | 0.624947000000  | 5.329719000000  | C  | -4.615061000000 | 2.253670000000  | -1.896148000000 |
| H | 5.208998000000  | 1.916221000000  | 4.124656000000  | H  | -4.461763000000 | 1.186342000000  | -1.716053000000 |
| H | 3.841959000000  | 1.792022000000  | 5.249172000000  | C  | -6.117987000000 | 2.476919000000  | -2.173656000000 |
| C | 2.855194000000  | -0.650715000000 | 4.439977000000  | H  | -6.321726000000 | 3.532107000000  | -2.391760000000 |
| H | 2.333207000000  | -1.340753000000 | 3.771325000000  | H  | -6.436771000000 | 1.887476000000  | -3.041468000000 |
| H | 3.402006000000  | -1.245252000000 | 5.181403000000  | H  | -6.745141000000 | 2.191484000000  | -1.321600000000 |
| H | 2.103053000000  | -0.066407000000 | 4.979332000000  | C  | -3.789867000000 | 2.619859000000  | -3.144144000000 |
| C | 6.347474000000  | -0.411675000000 | -0.791013000000 | H  | -3.992068000000 | 3.645401000000  | -3.476091000000 |
| H | 5.558087000000  | 0.240202000000  | -1.175783000000 | H  | -2.717266000000 | 2.516051000000  | -2.961895000000 |
| C | 7.691312000000  | 0.350085000000  | -0.834316000000 | H  | -4.052654000000 | 1.951945000000  | -3.971891000000 |
| H | 7.696821000000  | 1.244054000000  | -0.200596000000 | C  | -3.560793000000 | 2.589986000000  | 3.163273000000  |
| H | 8.512178000000  | -0.292689000000 | -0.493859000000 | H  | -3.636338000000 | 1.504189000000  | 3.076719000000  |
| H | 7.916984000000  | 0.663673000000  | -1.860627000000 | C  | -4.693666000000 | 3.081164000000  | 4.089517000000  |
| C | 6.425310000000  | -1.626558000000 | -1.735080000000 | H  | -5.688001000000 | 2.869977000000  | 3.678539000000  |
| H | 5.525449000000  | -2.239887000000 | -1.674530000000 | H  | -4.621900000000 | 2.594699000000  | 5.069434000000  |
| H | 6.531154000000  | -1.282660000000 | -2.770289000000 | H  | -4.632625000000 | 4.163811000000  | 4.250803000000  |
| H | 7.293768000000  | -2.257898000000 | -1.510941000000 | C  | -2.189590000000 | 2.893256000000  | 3.795450000000  |
| C | 3.004837000000  | 2.543182000000  | -3.127692000000 | H  | -1.375306000000 | 2.567521000000  | 3.144772000000  |
| H | 3.621306000000  | 1.870291000000  | -2.523973000000 | H  | -2.066307000000 | 3.965137000000  | 3.991336000000  |
| C | 3.891251000000  | 3.719631000000  | -3.601130000000 | H  | -2.088858000000 | 2.366973000000  | 4.751306000000  |
| H | 4.754424000000  | 3.343959000000  | -4.163733000000 | C  | 1.503108000000  | -2.328383000000 | 0.324114000000  |
| H | 3.324264000000  | 4.385598000000  | -4.262703000000 | C  | 2.406395000000  | -2.950728000000 | 1.204863000000  |
| H | 4.264579000000  | 4.328885000000  | -2.770699000000 | C  | 0.387221000000  | -3.064408000000 | -0.096295000000 |
| C | 2.528664000000  | 1.746626000000  | -4.357196000000 | C  | 2.165620000000  | -4.236626000000 | 1.705048000000  |
| H | 3.390095000000  | 1.280629000000  | -4.848777000000 | H  | 3.321970000000  | -2.445222000000 | 1.502657000000  |
| H | 1.832633000000  | 0.953989000000  | -4.076397000000 | C  | 0.157077000000  | -4.358052000000 | 0.379100000000  |
| H | 2.044029000000  | 2.395430000000  | -5.096508000000 | H  | -0.304278000000 | -2.637145000000 | -0.816587000000 |
| C | -3.563774000000 | -3.177910000000 | 2.738704000000  | C  | 1.039193000000  | -4.947118000000 | 1.290790000000  |
| H | -3.421905000000 | -2.097348000000 | 2.820960000000  | H  | 2.877863000000  | -4.688494000000 | 2.392905000000  |
| C | -4.779725000000 | -3.585574000000 | 3.602115000000  | H  | -0.715990000000 | -4.906444000000 | 0.032466000000  |
| H | -5.715438000000 | -3.131812000000 | 3.257562000000  | H  | 0.860447000000  | -5.956085000000 | 1.655782000000  |
| H | -4.918871000000 | -4.672899000000 | 3.578311000000  | H  | 5.076832000000  | 2.678963000000  | 2.185497000000  |
| H | -4.622461000000 | -3.291892000000 | 4.647014000000  | H  | 4.001957000000  | 4.212157000000  | 0.501525000000  |
| C | -2.293645000000 | -3.843684000000 | 3.303240000000  | H  | -5.469180000000 | -1.069294000000 | 2.538019000000  |
| H | -1.429127000000 | -3.688939000000 | 2.655776000000  | H  | -5.918967000000 | 1.246455000000  | 2.185497000000  |
| H | -2.064427000000 | -3.423405000000 | 4.288996000000  | Se | -0.314222000000 | 0.435425000000  | 0.836722000000  |
| H | -2.431236000000 | -4.923418000000 | 3.435545000000  | C  | -0.651374000000 | -0.274594000000 | 2.641653000000  |
| C | -5.140593000000 | -1.967230000000 | -2.038794000000 | F  | -1.966846000000 | -0.218335000000 | 2.988287000000  |
| H | -4.786956000000 | -0.959570000000 | -1.804088000000 | F  | 0.015991000000  | 0.472411000000  | 3.556966000000  |
| C | -6.682541000000 | -1.962168000000 | -1.937310000000 | F  | -0.260291000000 | -1.544016000000 | 2.823627000000  |
| H | -7.110504000000 | -1.247889000000 | -2.650974000000 | I  | -1.209026000000 | -0.449590000000 | -2.917851000000 |
| H | -7.086466000000 | -2.954618000000 | -2.169999000000 | Se | 2.794143000000  | -0.910004000000 | -2.012885000000 |
| H | -7.035642000000 | -1.689806000000 | -0.937017000000 | C  | 2.810748000000  | -2.785092000000 | -2.600445000000 |
| C | -4.723676000000 | -2.255998000000 | -3.491475000000 | F  | 3.480625000000  | -3.617449000000 | -1.769678000000 |
| H | -5.056788000000 | -1.435941000000 | -4.137927000000 | F  | 3.458158000000  | -2.828507000000 | -3.792666000000 |
| H | -3.638280000000 | -2.341590000000 | -3.588365000000 | F  | 1.594456000000  | -3.325340000000 | -2.803111000000 |

Zero-point correction= 1.320910 (Hartree/Particle)  
 Thermal correction to Energy= 1.407089  
 Thermal correction to Enthalpy= 1.408033  
 Thermal correction to Gibbs Free Energy= 1.193418  
 Sum of electronic and zero-point Energies= -8379.343664  
 Sum of electronic and thermal Energies= -8379.257485  
 Sum of electronic and thermal Enthalpies= -8379.256541  
 Sum of electronic and thermal Free Energies= -8379.471156  
 CPCM (Benzene) PBE0-D3/def2TZVP E = -11343.6760589  
 CPCM (Benzene) M06L/def2TZVP E = -11347.7853293

### TS-RE-I/SeCF<sub>3</sub>-PhSeCF<sub>3</sub> triplet

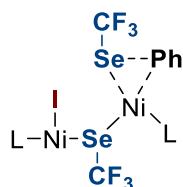

|    |             |             |             |   |             |             |             |
|----|-------------|-------------|-------------|---|-------------|-------------|-------------|
| Ni | 2.12189500  | -0.36795800 | 0.15923800  | N | 4.61681600  | 1.23432800  | 0.60932700  |
| Ni | -2.17411500 | -0.17257400 | -0.48337700 | N | -4.66733300 | -1.06626400 | 0.86873400  |
| C  | 3.35404200  | 1.27980400  | 0.11514200  | N | -4.57369400 | 1.11306400  | 0.75901800  |
| C  | 5.29033700  | 2.55376400  | 0.58119500  | H | 4.76192300  | 3.50014300  | -1.32686600 |
| C  | 4.35884000  | 3.36756100  | -0.31751500 | H | 6.30198600  | 2.46705800  | 0.18162600  |
| C  | -3.88998300 | -0.02552700 | 0.45915200  | H | -6.75512900 | -1.19299000 | 1.28204200  |
| C  | -5.94075200 | 0.85479400  | 1.26151200  | H | -6.67489000 | 1.07468200  | 0.47576800  |
| C  | -5.87591700 | -0.63118400 | 1.60509500  | C | 1.96850300  | 3.00808800  | -1.05628700 |
| N  | 3.14618800  | 2.51784600  | -0.37459100 | C | 1.04614100  | 3.82195600  | -0.35849800 |

|   |             |             |             |    |             |             |             |
|---|-------------|-------------|-------------|----|-------------|-------------|-------------|
| C | 1.80158800  | 2.71447200  | -2.43457800 | C  | 2.26706000  | 1.01138600  | -4.29602000 |
| C | -0.09674900 | 4.24326300  | -1.05535100 | H  | 3.06938200  | 0.40485800  | -4.73213000 |
| C | 0.64394800  | 3.17262100  | -3.07256100 | H  | 1.53479400  | 0.34097600  | -3.83957100 |
| C | -0.31027200 | 3.91412000  | -2.38647400 | H  | 1.77467400  | 1.53667900  | -5.12265600 |
| H | -0.84205600 | 4.83058400  | -0.52646400 | C  | -3.74033100 | -2.68597700 | 3.16123900  |
| H | 0.48181500  | 2.93096700  | -4.11695600 | H  | -3.69226600 | -1.59717400 | 3.07249000  |
| H | -1.21938400 | 4.23407300  | -2.88736400 | C  | -4.89044800 | -3.05419900 | 4.12482300  |
| C | 5.28708300  | 0.10900000  | 1.21617900  | H  | -5.86921500 | -2.74217200 | 3.74446900  |
| C | 6.25020000  | -0.59799800 | 0.45219000  | H  | -4.93272400 | -4.13914700 | 4.27899800  |
| C | 5.04853100  | -0.20656500 | 2.57584300  | H  | -4.73835400 | -2.58358200 | 5.10386500  |
| C | 6.93097200  | -1.65529400 | 1.06760600  | C  | -2.39770700 | -3.14107200 | 3.76245800  |
| C | 5.76273200  | -1.27396200 | 3.13733100  | H  | -1.56362000 | -2.93662200 | 3.08960700  |
| C | 6.68914300  | -1.99741000 | 2.39415100  | H  | -2.21158100 | -2.60755100 | 4.70190000  |
| H | 7.66632100  | -2.21625400 | 0.49915100  | H  | -2.40020600 | -4.21338300 | 3.99170000  |
| H | 5.59369600  | -1.53673400 | 4.17663300  | C  | -5.27055400 | -2.25125400 | -1.75869500 |
| H | 7.23020700  | -2.82176600 | 2.85125200  | H  | -4.84477000 | -1.24484600 | -1.70748500 |
| C | -4.41789000 | -2.47365800 | 0.67438000  | C  | -6.80752900 | -2.13063700 | -1.66189200 |
| C | -4.71116400 | -3.05780600 | -0.58521700 | H  | -7.19602000 | -1.54391000 | -2.50313900 |
| C | -3.99335100 | -3.26148500 | 1.76960100  | H  | -7.27776800 | -3.12103300 | -1.69768600 |
| C | -4.52797200 | -4.43890400 | -0.72392400 | H  | -7.13288100 | -1.64310300 | -0.73752000 |
| C | -3.84423500 | -4.64165200 | 1.57488100  | C  | -4.88917600 | -2.81991000 | -3.13612200 |
| C | -4.10045600 | -5.22722400 | 0.34085600  | H  | -5.17775900 | -2.10672800 | -3.91594500 |
| H | -4.73017100 | -4.90835300 | -1.68009000 | H  | -3.81087000 | -2.97739800 | -3.21872500 |
| H | -3.52452900 | -5.26383300 | 2.40569600  | H  | -5.40749800 | -3.76304300 | -3.35090400 |
| H | -3.97490200 | -6.29883800 | 0.20766200  | C  | -5.20486100 | 2.15135400  | -1.94348300 |
| C | -4.22255600 | 2.47041900  | 0.42848000  | H  | -5.21366900 | 1.10737200  | -1.61788700 |
| C | -3.70065700 | 3.30252000  | 1.44654000  | C  | -6.66966800 | 2.59592000  | -2.14908800 |
| C | -4.53773900 | 2.98384600  | -0.85163100 | H  | -6.72037000 | 3.62554500  | -2.52218200 |
| C | -3.47505100 | 4.65212800  | 1.14813900  | H  | -7.16400400 | 1.94964100  | -2.88435700 |
| C | -4.28377200 | 4.33973900  | -1.09818300 | H  | -7.24643900 | 2.55535300  | -1.21766400 |
| C | -3.76035900 | 5.17000000  | -0.11208000 | C  | -4.43823700 | 2.19937000  | -3.27796200 |
| H | -3.08277600 | 5.30914600  | 1.91942400  | H  | -4.41606500 | 3.21387200  | -3.69496600 |
| H | -4.52036500 | 4.75350300  | -2.07423800 | H  | -3.41165600 | 1.84264300  | -3.16080300 |
| H | -3.58701800 | 6.22283200  | -0.32155900 | H  | -4.93063400 | 1.55284800  | -4.01382800 |
| C | 1.16506800  | 4.40029800  | 1.06111800  | C  | -3.42410000 | 2.79637000  | 2.85937100  |
| H | 0.12828000  | 4.46536400  | 1.41298600  | H  | -3.50116000 | 1.70638100  | 2.84441600  |
| C | 1.68795500  | 5.85412400  | 0.99405000  | C  | -4.46582700 | 3.34031100  | 3.85987800  |
| H | 1.65521100  | 6.31814700  | 1.98748800  | H  | -5.49086500 | 3.08368900  | 3.56846000  |
| H | 2.72642400  | 5.89637600  | 0.64278200  | H  | -4.28560600 | 2.93085000  | 4.86118600  |
| H | 1.08681400  | 6.46382200  | 0.31160100  | H  | -4.41035500 | 4.43342400  | 3.93051400  |
| C | 1.91136500  | 3.61154400  | 2.14563200  | C  | -2.00102000 | 3.13828300  | 3.35543000  |
| H | 2.99693300  | 3.62331700  | 2.01132200  | H  | -1.25376600 | 2.78882900  | 2.61863600  |
| H | 1.70707900  | 4.07508300  | 3.11875700  | H  | -1.86937000 | 4.21848000  | 3.47435000  |
| H | 1.56877700  | 2.57679600  | 2.19142900  | H  | -1.79753600 | 2.65404300  | 4.29697900  |
| C | 4.10121100  | 0.59603000  | 3.46431500  | C  | 1.75594000  | -2.29815900 | 0.28403800  |
| H | 3.43612300  | 1.17710300  | 2.82010500  | C  | 2.65310000  | -2.86953400 | 1.19842500  |
| C | 4.89499800  | 1.58912700  | 4.34152500  | C  | 0.50921800  | -2.88423000 | 0.03237800  |
| H | 5.55509700  | 1.05334700  | 5.03447500  | C  | 2.24453400  | -3.97491600 | 1.95340300  |
| H | 5.52204200  | 2.25964400  | 3.74324800  | H  | 3.65278400  | -2.46738400 | 1.32929900  |
| H | 4.21002100  | 2.20486500  | 4.93586800  | C  | 0.12690800  | -4.00110700 | 0.77395200  |
| C | 3.21032000  | -0.29075600 | 4.35434300  | H  | -0.15565900 | -2.46142500 | -0.71397900 |
| H | 2.66540400  | -1.03638700 | 3.76921400  | C  | 0.98782400  | -4.54035500 | 1.73777500  |
| H | 3.79469600  | -0.81484800 | 5.11967500  | H  | 2.92510400  | -4.40664500 | 2.68293800  |
| H | 2.47193300  | 0.32863300  | 4.87183100  | H  | -0.84952100 | -4.44525100 | 0.60029700  |
| C | 6.62419800  | -0.21821700 | -0.97962800 | H  | 0.68282200  | -5.41472800 | 2.30697800  |
| H | 5.86539100  | 0.47699800  | -1.35381500 | H  | 5.35608400  | 2.95596700  | 1.59871600  |
| C | 7.99511300  | 0.49543600  | -1.01153100 | H  | 4.12062100  | 4.35208900  | 0.08885000  |
| H | 8.03431700  | 1.36356800  | -0.34405200 | H  | -5.74262800 | -0.79247600 | 2.68022000  |
| H | 8.79365800  | -0.18832600 | -0.70018200 | H  | -6.16507700 | 1.48460100  | 2.12555300  |
| H | 8.22512600  | 0.83702600  | -2.02763400 | Se | -0.15070000 | 0.57734200  | 0.77079100  |
| C | 6.65345800  | -1.42191000 | -1.94076400 | C  | -0.31263400 | -0.05253900 | 2.61674300  |
| H | 5.70093900  | -1.95625600 | -1.94006100 | F  | -1.60455700 | -0.09337500 | 3.02949700  |
| H | 6.84769400  | -1.07449200 | -2.96228900 | F  | 0.32977300  | 0.77888000  | 3.48626000  |
| H | 7.44965000  | -2.12913800 | -1.68192200 | F  | 0.20364400  | -1.28419800 | 2.84123500  |
| C | 2.86077900  | 2.00142900  | -3.27473500 | Se | 2.84004700  | -1.45439500 | -1.75112100 |
| H | 3.51112200  | 1.43069000  | -2.60297600 | C  | 2.76520300  | -3.36739200 | -2.30140900 |
| C | 3.73828700  | 3.03448400  | -4.01966900 | F  | 3.45850800  | -3.40373600 | -3.46042600 |
| H | 4.53512900  | 2.52883000  | -4.57854900 | F  | 3.36554500  | -4.21056500 | -1.44604900 |
| H | 3.13368100  | 3.60228400  | -4.73673400 | F  | 1.53567000  | -3.83092300 | -2.54415000 |
| H | 4.20417400  | 3.75964400  | -3.34315200 | I  | -1.52293000 | -0.73196500 | -2.94201800 |

Zero-point correction= 1.318893 (Hartree/Particle)  
Thermal correction to Energy= 1.405289  
Thermal correction to Enthalpy= 1.406233  
Thermal correction to Gibbs Free Energy= 1.187794  
Sum of electronic and zero-point Energies= -8379.371016  
Sum of electronic and thermal Energies= -8379.284619  
Sum of electronic and thermal Enthalpies= -8379.283675  
Sum of electronic and thermal Free Energies= -8379.502115  
CPCM (Benzene) PBE0-D3/def2TZVP E = -11343.6967467  
CPCM (Benzene) M06L/def2TZVP E = -11347.7862146

## TS-RE-I/SeCF<sub>3</sub>-PhSeCF<sub>3</sub> *singlet*

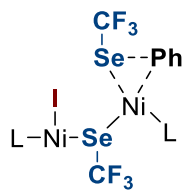

|    |             |             |             |    |             |             |             |
|----|-------------|-------------|-------------|----|-------------|-------------|-------------|
| Ni | 2.38472300  | -0.25666800 | -0.16466600 | H  | 7.84963600  | 1.47609300  | -3.33235700 |
| Ni | -2.20739800 | 0.18785600  | -0.28814900 | C  | 6.21595900  | -0.74570400 | -3.07023200 |
| C  | 3.53858500  | 1.31217500  | 0.01067300  | H  | 5.21696700  | -1.16088900 | -2.90343900 |
| C  | 5.53197300  | 2.60133000  | 0.24194900  | H  | 6.22197400  | -0.28488900 | -4.06542700 |
| C  | 4.43240200  | 3.49361400  | -0.31283100 | H  | 6.93188500  | -1.57606000 | -3.08506500 |
| C  | -3.63641200 | -0.55773600 | 0.68570300  | C  | 2.18802000  | 2.49065800  | -2.95239700 |
| C  | -5.48715900 | -0.65494500 | 2.12970100  | H  | 2.92924800  | 1.80672600  | -2.52903900 |
| C  | -4.97750300 | -2.07008400 | 1.89281700  | C  | 2.93551600  | 3.54843700  | -3.79654900 |
| N  | 3.23761400  | 2.63084800  | -0.18948600 | C  | 3.51683300  | 3.06365600  | -4.59063300 |
| N  | 4.89784500  | 1.26830600  | 0.17886100  | H  | 2.22523000  | 4.23503800  | -4.27263000 |
| N  | -3.70627800 | -1.82121500 | 1.17512700  | H  | 3.62150100  | 4.15531500  | -3.19567200 |
| N  | -4.73062400 | 0.12187900  | 1.12216300  | C  | 1.27158900  | 1.66481600  | -3.87498700 |
| H  | 4.59905900  | 3.75141200  | -1.36570600 | H  | 1.87919700  | 1.09680900  | -4.58931700 |
| H  | 6.44846000  | 2.62818400  | -0.35199400 | H  | 0.65772100  | 0.95883900  | -3.31120000 |
| H  | -5.64839100 | -2.66391400 | 1.25968600  | H  | 0.60027600  | 2.30438300  | -4.45907700 |
| H  | -6.56112100 | -0.54815900 | 1.97622600  | C  | -1.97221200 | -2.91705900 | 3.26539400  |
| C  | 1.96351300  | 3.23817100  | -0.48118800 | H  | -2.46202500 | -1.93953400 | 3.24665900  |
| C  | 1.32620400  | 4.01938000  | 0.51145500  | C  | -2.67831000 | -3.79820000 | 4.31892800  |
| C  | 1.44103600  | 3.15963000  | -1.79949500 | H  | -3.72747300 | -3.99308500 | 4.06831600  |
| C  | 0.11635300  | 4.64411200  | 0.16778900  | H  | -2.18218300 | -4.77175300 | 4.41014700  |
| C  | 0.22979000  | 3.80167200  | -2.07512600 | H  | -2.64795000 | -3.31567300 | 5.30318200  |
| C  | -0.43969200 | 4.53054200  | -1.09839400 | C  | -0.51051300 | -2.67546200 | 3.68496200  |
| H  | -0.39505800 | 5.23356400  | 0.92482900  | H  | 0.02815200  | -2.10134600 | 2.92881800  |
| H  | -0.19774200 | 3.73168500  | -3.06928400 | H  | -0.47727300 | -2.11635300 | 4.62689500  |
| H  | -1.38619500 | 5.01151700  | -1.32898100 | H  | 0.02517400  | -3.61882200 | 3.84275800  |
| C  | 5.75418200  | 0.14722400  | 0.44493700  | C  | -4.04580500 | -3.14582600 | -1.46839000 |
| C  | 6.61516200  | -0.29102600 | -0.59055800 | H  | -4.37061100 | -2.13164900 | -1.22258800 |
| C  | 5.84254000  | -0.38553100 | 1.74998800  | C  | -5.29476200 | -4.05566600 | -1.47103300 |
| C  | 7.54772100  | -1.29282900 | -0.29645500 | H  | -6.03302500 | -3.68732500 | -2.19333500 |
| C  | 6.79232600  | -1.38714200 | 1.98894300  | H  | -5.03041800 | -5.08140700 | -1.75477300 |
| C  | 7.63947000  | -1.83819200 | 0.98163300  | H  | -5.77542800 | -4.10232000 | -0.48684000 |
| H  | 8.21516300  | -1.64523700 | -1.07827800 | C  | -3.43794600 | -3.08694700 | -2.88220600 |
| H  | 6.87263600  | -1.81449100 | 2.98468000  | H  | -4.16495700 | -2.65250400 | -3.57706000 |
| H  | 8.37506400  | -2.61036200 | 1.19284800  | H  | -2.53913900 | -2.46896000 | -2.90943500 |
| C  | -2.89825200 | -2.97274700 | 0.85125000  | H  | -3.18265900 | -4.08603000 | -3.25571000 |
| C  | -3.05609600 | -3.61215000 | -0.40166800 | C  | -6.89769000 | 0.12610300  | -0.86526100 |
| C  | -2.08635600 | -3.52594600 | 1.86972600  | H  | -6.25176400 | -0.71428800 | -0.59173600 |
| C  | -2.32299500 | -4.78398900 | -0.63143200 | C  | -8.30459800 | -0.14355900 | -0.28464800 |
| C  | -1.39771200 | -4.71144800 | 1.58857800  | H  | -9.00444700 | 0.64552300  | -0.58365800 |
| C  | -1.49910800 | -5.32966100 | 0.34608900  | H  | -8.69745500 | -1.09715600 | -0.65750400 |
| H  | -2.41299800 | -5.28430200 | -1.59050600 | H  | -8.30825800 | -0.17982400 | 0.81081400  |
| H  | -0.77701800 | -5.15959300 | 2.35892800  | C  | -6.97407700 | 0.15411900  | -2.40383100 |
| H  | -0.94474400 | -6.24208000 | 0.14396300  | H  | -7.67369100 | 0.91954800  | -2.75950300 |
| C  | -5.26724500 | 1.39822400  | 0.70339800  | H  | -5.99491000 | 0.35290100  | -2.84556600 |
| C  | -4.85791100 | 2.58617200  | 1.34614100  | H  | -7.33466700 | -0.81319400 | -2.77456100 |
| C  | -6.30444100 | 1.39957800  | -0.26289900 | C  | -3.87084300 | 2.59798000  | 2.50823500  |
| C  | -5.45102300 | 3.78955700  | 0.94119900  | H  | -3.31316900 | 1.65826800  | 2.49819600  |
| C  | -6.86139800 | 2.63069000  | -0.62519200 | C  | -4.62511300 | 2.68611600  | 3.85365100  |
| C  | -6.43236600 | 3.81843600  | -0.04261900 | H  | -5.35021400 | 1.87313800  | 3.97376200  |
| H  | -5.14641300 | 4.71760700  | 1.41413600  | H  | -3.91928200 | 2.63834600  | 4.69153100  |
| H  | -7.64763400 | 2.65751900  | -1.37358900 | H  | -5.17674200 | 3.63107800  | 3.93020600  |
| H  | -6.87604300 | 4.76416500  | -0.34271500 | C  | -2.84344000 | 3.73756000  | 2.40650500  |
| C  | 1.81503000  | 4.35030500  | 1.93395600  | H  | -2.31375200 | 3.70722800  | 1.45060400  |
| H  | 0.89687100  | 4.37453000  | 2.53301900  | H  | -3.31528400 | 4.72168400  | 2.51108900  |
| C  | 2.39458400  | 5.78325400  | 1.98553300  | H  | -2.10316600 | 3.64181300  | 3.20647400  |
| H  | 2.62020700  | 6.06484700  | 3.02145300  | C  | 2.77044700  | -2.30551000 | -0.30121600 |
| H  | 3.32445000  | 5.86794800  | 1.41028800  | C  | 4.11231600  | -2.74507200 | -0.30245400 |
| H  | 1.69029500  | 6.51612800  | 1.57885400  | C  | 1.84406300  | -3.00065500 | 0.50584400  |
| C  | 2.74921800  | 3.37552600  | 2.66609300  | C  | 4.53238500  | -3.76536500 | 0.54487100  |
| H  | 3.77890000  | 3.41970500  | 2.30200500  | H  | 4.82650700  | -2.28890800 | -0.97464200 |
| H  | 2.77661700  | 3.65179300  | 3.72777200  | C  | 2.27957700  | -4.02315000 | 1.35328200  |
| H  | 2.40408000  | 2.34357100  | 2.59973700  | H  | 0.79317000  | -2.74868600 | 0.48309600  |
| C  | 4.97203500  | 0.10701100  | 2.90025800  | C  | 3.61845300  | -4.40921100 | 1.38446000  |
| H  | 4.28564800  | 0.85788800  | 2.50323100  | H  | 5.57553400  | -4.06714700 | 0.53334800  |
| C  | 5.82147400  | 0.78369900  | 3.99507100  | H  | 1.55136400  | -4.52904900 | 1.98005500  |
| H  | 6.51335900  | 0.07351500  | 4.46364200  | H  | 3.94348600  | -5.21616500 | 2.03592900  |
| H  | 6.41894300  | 1.60948200  | 3.59083300  | H  | 5.79486900  | 2.83935900  | 1.28147800  |
| H  | 5.17468800  | 1.18714400  | 4.78326000  | H  | 4.30327400  | 4.42118300  | 0.24668800  |
| C  | 4.10634800  | -1.02084900 | 3.49283800  | H  | -4.79720400 | -2.62108600 | 2.81625900  |
| H  | 3.48166300  | -1.48309800 | 2.72340100  | H  | -5.24014000 | -0.28758500 | 3.13350700  |
| H  | 4.72160900  | -1.80656800 | 3.94771700  | Se | 2.22260700  | -1.37028000 | -2.13997100 |
| H  | 3.44763300  | -0.61850300 | 4.27132800  | C  | 0.67781300  | -2.59135500 | -2.46732600 |
| C  | 6.58161700  | 0.30157100  | -1.99959900 | F  | -0.37438600 | -2.32434200 | -1.66143500 |
| H  | 5.79753200  | 1.06424900  | -2.02429300 | F  | 0.96261300  | -3.89661400 | -2.32728500 |
| C  | 7.91893700  | 0.98461000  | -2.35471200 | F  | 0.27603100  | -2.39226200 | -3.73693200 |
| H  | 8.20142200  | 1.74054700  | -1.61283000 | I  | -3.06933400 | 1.01882100  | -2.50236400 |
| H  | 8.73706700  | 0.25665300  | -2.40703400 | Se | -0.10313700 | -0.04430400 | 0.64360000  |

C -0.18821600 0.78911300 2.41781600  
F -1.27744300 0.37284900 3.11887800

F -0.24689600 2.13754600 2.39771900  
F 0.89567300 0.46210500 3.16200600

Zero-point correction= 1.318666 (Hartree/Particle)  
Thermal correction to Energy= 1.405135  
Thermal correction to Enthalpy= 1.406079  
Thermal correction to Gibbs Free Energy= 1.187973  
Sum of electronic and zero-point Energies= -8379.318467  
Sum of electronic and thermal Energies= -8379.231999  
Sum of electronic and thermal Enthalpies= -8379.231054  
Sum of electronic and thermal Free Energies= -8379.449161  
CPCM (Benzene) PBE0-D3/def2TZVP E = -11343.6514302  
CPCM (Benzene) M06L/def2TZVP E = -11347.7689492

**[(SIPr)Ni(I)(SeCF<sub>3</sub>)Ni(SIPr)] (8) singlet**

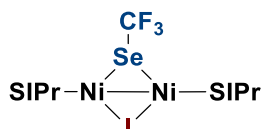

|    |                |                 |                 |    |                 |                 |                 |
|----|----------------|-----------------|-----------------|----|-----------------|-----------------|-----------------|
| Ni | 1.199769000000 | -0.008840000000 | -0.055750000000 | H  | 2.431979000000  | -2.910997000000 | 4.976358000000  |
| I  | 0.101930000000 | 1.952419000000  | -1.299625000000 | C  | 3.044314000000  | -1.902605000000 | 3.176943000000  |
| N  | 4.039662000000 | -0.043258000000 | -0.861422000000 | C  | 3.405273000000  | -3.204589000000 | 2.466531000000  |
| N  | 3.757755000000 | -0.565795000000 | 1.241877000000  | H  | 3.555392000000  | -2.971555000000 | 1.407756000000  |
| C  | 3.097803000000 | -0.189308000000 | 0.108409000000  | C  | 4.718459000000  | -3.793986000000 | 3.025439000000  |
| C  | 5.388674000000 | -0.464699000000 | -0.427618000000 | H  | 5.550173000000  | -3.082555000000 | 2.968468000000  |
| H  | 6.145950000000 | 0.253633000000  | -0.750871000000 | H  | 5.003175000000  | -4.695337000000 | 2.469226000000  |
| H  | 5.633657000000 | -1.441719000000 | -0.863171000000 | H  | 4.601450000000  | -4.074244000000 | 4.079331000000  |
| C  | 5.228039000000 | -0.532287000000 | 1.091039000000  | C  | 2.284485000000  | -4.258185000000 | 2.548043000000  |
| H  | 5.688913000000 | -1.419520000000 | 1.530397000000  | H  | 2.151634000000  | -4.628378000000 | 3.571666000000  |
| H  | 5.636964000000 | 0.353110000000  | 1.597212000000  | H  | 2.533488000000  | -5.119802000000 | 1.917781000000  |
| C  | 3.850232000000 | 0.425804000000  | -2.209448000000 | H  | 1.329972000000  | -3.850474000000 | 2.208243000000  |
| C  | 3.483089000000 | -0.480021000000 | -3.228879000000 | Ni | -1.244453000000 | 0.119987000000  | -0.108170000000 |
| C  | 3.245604000000 | -1.962962000000 | -2.962878000000 | N  | -4.092731000000 | -0.575174000000 | -0.398270000000 |
| H  | 3.112243000000 | -2.097800000000 | -1.885957000000 | N  | -3.811172000000 | 1.383812000000  | 0.521371000000  |
| C  | 4.466055000000 | -2.799833000000 | -3.403389000000 | C  | -3.145855000000 | 0.313649000000  | 0.001874000000  |
| H  | 4.627320000000 | -2.716261000000 | -4.485212000000 | C  | -5.468261000000 | -0.048100000000 | -0.287149000000 |
| H  | 4.310429000000 | -3.859396000000 | -3.167004000000 | H  | -6.144089000000 | -0.798716000000 | 0.129459000000  |
| H  | 5.387925000000 | -2.473015000000 | -2.908579000000 | H  | -5.840965000000 | 0.236591000000  | -1.280714000000 |
| C  | 1.968159000000 | -2.489028000000 | -3.641559000000 | C  | -5.268213000000 | 1.159860000000  | 0.628465000000  |
| H  | 2.065624000000 | -2.508144000000 | -4.733708000000 | H  | -5.827486000000 | 2.040979000000  | 0.306608000000  |
| H  | 1.102535000000 | -1.873736000000 | -3.384460000000 | H  | -5.538194000000 | 0.943103000000  | 1.671078000000  |
| H  | 1.763890000000 | -3.511946000000 | -3.308886000000 | C  | -3.876897000000 | -1.835519000000 | -1.055389000000 |
| C  | 3.382881000000 | 0.009318000000  | -4.537600000000 | C  | -3.623523000000 | -1.869219000000 | -2.444159000000 |
| H  | 3.099169000000 | -0.667942000000 | -5.337414000000 | C  | -3.518790000000 | -0.607054000000 | -3.294950000000 |
| C  | 3.644734000000 | 1.343152000000  | -4.833954000000 | H  | -3.576248000000 | 0.258063000000  | -2.627944000000 |
| H  | 3.559791000000 | 1.700684000000  | -5.856925000000 | C  | -4.692610000000 | -0.510106000000 | -4.291393000000 |
| C  | 4.022688000000 | 2.216920000000  | -3.818947000000 | H  | -4.670175000000 | -1.333586000000 | -5.015111000000 |
| H  | 4.234555000000 | 3.255166000000  | -4.058692000000 | H  | -4.639742000000 | 0.429617000000  | -4.854250000000 |
| C  | 4.138079000000 | 1.781398000000  | -2.493700000000 | H  | -5.661899000000 | -0.547361000000 | -3.779866000000 |
| C  | 4.611245000000 | 2.767175000000  | -1.427875000000 | C  | -2.167045000000 | -0.514647000000 | -4.027136000000 |
| H  | 4.560248000000 | 2.262745000000  | -0.458255000000 | H  | -2.035992000000 | -1.338157000000 | -4.739441000000 |
| C  | 3.712755000000 | 4.015013000000  | -1.332978000000 | H  | -1.335963000000 | -0.536818000000 | -3.316711000000 |
| H  | 3.728524000000 | 4.595439000000  | -2.262985000000 | H  | -2.104072000000 | 0.425394000000  | -4.588023000000 |
| H  | 4.065872000000 | 4.672549000000  | -0.528783000000 | C  | -3.494035000000 | -3.121878000000 | -3.057134000000 |
| H  | 2.674901000000 | 3.740745000000  | -1.122654000000 | H  | -3.292107000000 | -3.173165000000 | -4.123455000000 |
| C  | 6.079539000000 | 3.179193000000  | -1.667033000000 | C  | -3.621353000000 | -4.299580000000 | -2.327751000000 |
| H  | 6.186721000000 | 3.728686000000  | -2.609767000000 | H  | -3.515435000000 | -5.261007000000 | -2.823754000000 |
| H  | 6.745884000000 | 2.309937000000  | -1.717928000000 | C  | -3.885512000000 | -4.245922000000 | -0.962218000000 |
| H  | 6.432363000000 | 3.831597000000  | -0.859101000000 | H  | -3.985245000000 | -5.170576000000 | -0.400723000000 |
| C  | 3.203024000000 | -0.635750000000 | 2.568192000000  | C  | -4.023062000000 | -3.021448000000 | -0.298907000000 |
| C  | 2.918670000000 | 0.558942000000  | 3.268942000000  | C  | -4.362131000000 | -3.006197000000 | 1.189688000000  |
| C  | 3.164798000000 | 1.947538000000  | 2.684420000000  | H  | -4.315240000000 | -1.966386000000 | 1.528359000000  |
| H  | 3.478363000000 | 1.830189000000  | 1.643806000000  | C  | -3.353718000000 | -3.801115000000 | 2.040131000000  |
| C  | 1.890504000000 | 2.811508000000  | 2.666791000000  | H  | -3.358870000000 | -4.867107000000 | 1.783739000000  |
| H  | 1.093395000000 | 2.329460000000  | 2.093421000000  | H  | -3.612625000000 | -3.716365000000 | 3.102747000000  |
| H  | 2.099391000000 | 3.780880000000  | 2.199158000000  | H  | -2.336516000000 | -3.427540000000 | 1.902227000000  |
| H  | 1.518555000000 | 3.005164000000  | 3.680162000000  | C  | -5.795434000000 | -3.522890000000 | 1.436502000000  |
| C  | 4.304065000000 | 2.667153000000  | 3.436599000000  | H  | -5.889796000000 | -4.576116000000 | 1.146248000000  |
| H  | 4.033409000000 | 2.858715000000  | 4.481806000000  | H  | -6.540213000000 | -2.958558000000 | 0.862920000000  |
| H  | 4.521681000000 | 3.633769000000  | 2.966403000000  | H  | -6.054865000000 | -3.445478000000 | 2.499374000000  |
| H  | 5.226199000000 | 2.073853000000  | 3.439039000000  | C  | -3.221010000000 | 2.518255000000  | 1.180109000000  |
| C  | 2.433218000000 | 0.454155000000  | 4.579080000000  | C  | -2.714454000000 | 2.381348000000  | 2.492763000000  |
| H  | 2.202812000000 | 1.359827000000  | 5.133247000000  | C  | -2.782806000000 | 1.071919000000  | 3.274362000000  |
| C  | 2.254902000000 | -0.783964000000 | 5.187699000000  | H  | -3.089406000000 | 0.278802000000  | 2.587054000000  |
| H  | 1.880850000000 | -0.841507000000 | 6.206750000000  | C  | -1.418398000000 | 0.655753000000  | 3.851863000000  |
| C  | 2.565922000000 | -1.948279000000 | 4.491689000000  | H  | -0.656690000000 | 0.604515000000  | 3.068726000000  |

|   |                |                |                |    |                |                |                |
|---|----------------|----------------|----------------|----|----------------|----------------|----------------|
| H | -1.49070900000 | -0.33304400000 | 4.31904900000  | H  | -4.09213500000 | 2.97481500000  | -1.26227500000 |
| H | -1.06856700000 | 1.35785300000  | 4.61799000000  | C  | -5.19936100000 | 4.74583900000  | -0.74220400000 |
| C | -3.84081900000 | 1.16055300000  | 4.39501300000  | H  | -5.90177300000 | 4.26786100000  | -0.04957100000 |
| H | -3.57146400000 | 1.92588100000  | 5.13290000000  | H  | -5.68527100000 | 4.82113100000  | -1.72257900000 |
| H | -3.92383200000 | 0.20185500000  | 4.92137900000  | H  | -5.02486900000 | 5.76499000000  | -0.37681700000 |
| H | -4.83033200000 | 1.41889100000  | 3.99968800000  | C  | -2.93250500000 | 4.66934800000  | -1.85314900000 |
| C | -2.18181200000 | 3.51847500000  | 3.11381400000  | H  | -2.70689400000 | 5.69661600000  | -1.54353600000 |
| H | -1.78181400000 | 3.43548000000  | 4.12030400000  | H  | -3.40993600000 | 4.72259700000  | -2.83920600000 |
| C | -2.16726700000 | 4.75270700000  | 2.47211600000  | H  | -1.98611800000 | 4.13179400000  | -1.95786200000 |
| H | -1.74929400000 | 5.62294000000  | 2.97277800000  | Se | -0.12039200000 | -1.58044300000 | 0.94258000000  |
| C | -2.70164800000 | 4.87495800000  | 1.19286200000  | C  | -0.00554600000 | -3.08038500000 | -0.35230700000 |
| H | -2.70086600000 | 5.84539700000  | 0.70483800000  | F  | -0.48283700000 | -2.79220400000 | -1.57741900000 |
| C | -3.24105000000 | 3.77051000000  | 0.52326400000  | F  | 1.28405800000  | -3.47694300000 | -0.51573100000 |
| C | -3.87068200000 | 3.96621300000  | -0.85390200000 | F  | -0.68372800000 | -4.16210600000 | 0.09288000000  |

Zero-point correction= 1.212953 (Hartree/Particle)  
 Thermal correction to Energy= 1.288055  
 Thermal correction to Enthalpy= 1.288999  
 Thermal correction to Gibbs Free Energy= 1.096041  
 Sum of electronic and zero-point Energies= -5411.311047  
 Sum of electronic and thermal Energies= -5411.235945  
 Sum of electronic and thermal Enthalpies= -5411.235001  
 Sum of electronic and thermal Free Energies= -5411.427959  
 CPCM (Benzene) PBE0-D3/def2TZVP E = -8373.51707297  
 CPCM (Benzene) M06L/def2TZVP E = -8376.92598502  
 CPCM (Benzene) M06/def2TZVP E = -8375.25900232

### TS-OA-I/SeCF<sub>3</sub>-Ph triplet

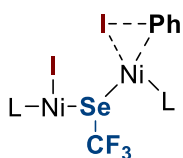

|    |                |                |                |   |                |                |                |
|----|----------------|----------------|----------------|---|----------------|----------------|----------------|
| Ni | 2.11791600000  | -0.20583200000 | 0.54048200000  | F | 0.12049400000  | 2.98809900000  | 1.57832800000  |
| Ni | -2.37283500000 | -0.62005700000 | -0.23451500000 | I | -1.87258300000 | -2.88450900000 | -1.40587300000 |
| C  | 3.78824900000  | 0.54145000000  | -0.41348700000 | C | 6.68012100000  | -2.09643300000 | -0.17513300000 |
| C  | 5.43627700000  | 2.14026900000  | -0.99060200000 | C | 8.09603500000  | -1.97624500000 | -0.78056500000 |
| C  | 5.73392200000  | 0.83740700000  | -1.72835600000 | C | 6.68538600000  | -3.15979700000 | 0.94205300000  |
| C  | -4.05335800000 | 0.33268200000  | 0.06475600000  | C | 2.86986900000  | -0.67398300000 | -3.37707000000 |
| C  | -5.96851700000 | 1.70085000000  | -0.16406300000 | C | 1.42249000000  | -1.18204300000 | -3.50878800000 |
| C  | -6.23155300000 | 0.66931400000  | 0.92768700000  | C | 3.39813800000  | -0.19976600000 | -4.74884700000 |
| N  | 4.74234500000  | -0.09719700000 | -1.14006500000 | C | -3.78037700000 | -0.45936600000 | 3.42223800000  |
| N  | 4.13010100000  | 1.85025200000  | -0.35528900000 | C | -2.35157200000 | -0.81795700000 | 3.86925700000  |
| N  | -5.07111800000 | -0.22772900000 | 0.77123100000  | C | -4.61968400000 | 0.03659100000  | 4.61786800000  |
| N  | -4.51651700000 | 1.52817800000  | -0.40576400000 | C | -6.46783100000 | -2.46394100000 | -0.50062800000 |
| C  | 4.69991400000  | -1.42913200000 | -1.70217400000 | C | -7.99960200000 | -2.51163600000 | -0.31211600000 |
| C  | 3.81403100000  | -1.70883600000 | -2.77009600000 | C | -6.01977800000 | -3.53839700000 | -1.50921300000 |
| C  | 5.64152100000  | -2.38607800000 | -1.25666600000 | C | -3.81158400000 | 4.24787700000  | 0.46122500000  |
| C  | 3.85061100000  | -2.99063600000 | -3.33281200000 | C | -5.02239100000 | 5.20823300000  | 0.47950200000  |
| C  | 5.63980100000  | -3.64695200000 | -1.86421000000 | C | -2.59237900000 | 4.96865800000  | 1.06784800000  |
| C  | 4.74629900000  | -3.95528500000 | -2.88453300000 | C | -4.15955100000 | 0.63278600000  | -3.23215400000 |
| C  | 3.36095200000  | 2.97855400000  | 0.12025400000  | C | -3.09795600000 | -0.06450600000 | -4.10173100000 |
| C  | 3.54577900000  | 3.45493400000  | 1.43680900000  | C | -5.47912700000 | 0.78909800000  | -4.01927300000 |
| C  | 2.56588400000  | 3.68451100000  | -0.81514800000 | H | 6.17882900000  | 2.36858600000  | -0.21681800000 |
| C  | 2.89760000000  | 4.64110100000  | 1.80407200000  | H | 5.35540300000  | 3.00540500000  | -1.65276200000 |
| C  | 1.93377300000  | 4.85774100000  | -0.38930000000 | H | 6.75034700000  | 0.47467200000  | -1.56520900000 |
| C  | 2.09856900000  | 5.33791500000  | 0.90524100000  | H | 5.56630800000  | 0.91209400000  | -2.80932500000 |
| C  | -5.06396700000 | -1.50136400000 | 1.44367000000  | H | -6.52456100000 | 1.48178800000  | -1.08567200000 |
| C  | -4.46551000000 | -1.62470600000 | 2.71694100000  | H | -6.20311100000 | 2.71937600000  | 0.14475900000  |
| C  | -5.74817800000 | -2.58312800000 | 0.84064900000  | H | -7.17093000000 | 0.12863700000  | 0.79507500000  |
| C  | -4.54021300000 | -2.86579200000 | 3.36196400000  | H | -6.22692500000 | 1.11333200000  | 1.93313300000  |
| C  | -5.79323300000 | -3.79959000000 | 1.53059200000  | H | 3.16727800000  | -3.23291900000 | -4.14063200000 |
| C  | -5.19259500000 | -3.94584200000 | 2.77704500000  | H | 6.34926500000  | -4.39928300000 | -1.53243900000 |
| C  | -3.87756300000 | 2.40297000000  | -1.35636500000 | H | 4.75534400000  | -4.94293700000 | -3.33766700000 |
| C  | -3.69689800000 | 1.98780400000  | -2.69880700000 | H | 3.02515400000  | 5.02560000000  | 2.81130400000  |
| C  | -3.55128300000 | 3.72116600000  | -0.94926200000 | H | 1.30867400000  | 5.40574000000  | -1.08816300000 |
| C  | -3.13910600000 | 2.90316300000  | -3.60160900000 | H | 1.60345700000  | 6.25473100000  | 1.21399400000  |
| C  | -3.01185100000 | 4.59623400000  | -1.89978900000 | H | -4.08237300000 | -2.98494600000 | 4.33981700000  |
| C  | -2.79764900000 | 4.19389500000  | -3.21365300000 | H | -6.30451600000 | -4.64612300000 | 1.08170500000  |
| C  | 2.66724600000  | -1.24478400000 | 2.23835600000  | H | -5.23601600000 | -4.90117000000 | 3.29369300000  |
| C  | 4.03369300000  | -1.16964700000 | 2.55550000000  | H | -2.98945200000 | 2.60148300000  | -4.63366000000 |
| C  | 1.70292900000  | -1.18964000000 | 3.25962100000  | H | -2.75922300000 | 5.61044500000  | -1.60435700000 |
| C  | 4.42688500000  | -0.98494800000 | 3.88177500000  | H | -2.37817200000 | 4.88857800000  | -3.93723100000 |
| C  | 2.11098200000  | -0.99714400000 | 4.58049600000  | H | 4.77653900000  | -1.26526200000 | 1.77457700000  |
| C  | 3.46888000000  | -0.90687300000 | 4.89698100000  | H | 0.65235700000  | -1.29874700000 | 3.02072100000  |
| Se | -0.23136300000 | 0.51900700000  | 0.36389700000  | H | 5.48535100000  | -0.91804400000 | 4.12124700000  |
| C  | -0.44370900000 | 1.78515600000  | 1.84320700000  | H | 1.36051100000  | -0.93965000000 | 5.36426900000  |
| F  | 0.11882500000  | 1.36687000000  | 3.00849900000  | H | 3.78024400000  | -0.78637900000 | 5.93099000000  |
| F  | -1.74974800000 | 2.02185200000  | 2.11916300000  | H | 6.42918500000  | -1.13268500000 | 0.28308300000  |

|   |                 |                 |                 |   |                 |                 |                 |
|---|-----------------|-----------------|-----------------|---|-----------------|-----------------|-----------------|
| H | 8.411317000000  | -2.928871000000 | -1.221818000000 | H | -1.691440000000 | 4.357522000000  | 1.018962000000  |
| H | 8.825502000000  | -1.708237000000 | -0.006740000000 | H | -2.391196000000 | 5.917452000000  | 0.555789000000  |
| H | 8.145534000000  | -1.219809000000 | -1.571648000000 | H | -2.787155000000 | 5.205261000000  | 2.120864000000  |
| H | 5.686997000000  | -3.317823000000 | 1.359487000000  | H | -4.349475000000 | -0.029983000000 | -2.384777000000 |
| H | 7.046100000000  | -4.126026000000 | 0.572341000000  | H | -2.911132000000 | 0.479375000000  | -5.036126000000 |
| H | 7.355454000000  | -2.852053000000 | 1.753980000000  | H | -3.438170000000 | -1.071273000000 | -4.365379000000 |
| H | 2.839834000000  | 0.195175000000  | -2.715194000000 | H | -2.153840000000 | -0.174107000000 | -3.561524000000 |
| H | 1.340102000000  | -1.996624000000 | -4.237378000000 | H | -6.266577000000 | 1.250676000000  | -3.411821000000 |
| H | 0.773150000000  | -0.369908000000 | -3.854861000000 | H | -5.335875000000 | 1.419604000000  | -4.905502000000 |
| H | 1.024111000000  | -1.547708000000 | -2.558983000000 | H | -5.839452000000 | -0.189880000000 | -4.357059000000 |
| H | 4.417648000000  | 0.199383000000  | -4.684998000000 | I | 2.056470000000  | -2.837451000000 | 0.511131000000  |
| H | 3.413922000000  | -1.026650000000 | -5.468598000000 | C | 2.404574000000  | 3.254024000000  | -2.270535000000 |
| H | 2.749910000000  | 0.585150000000  | -5.156360000000 | H | 2.946650000000  | 2.314688000000  | -2.409243000000 |
| H | -3.690426000000 | 0.365637000000  | 2.711728000000  | C | 3.024915000000  | 4.289525000000  | -3.232386000000 |
| H | -2.352372000000 | -1.585832000000 | 4.652233000000  | C | 0.932181000000  | 2.986477000000  | -2.636545000000 |
| H | -1.845782000000 | 0.068207000000  | 4.266301000000  | H | 0.483836000000  | 2.246395000000  | -1.967680000000 |
| H | -1.768885000000 | -1.193454000000 | 3.021750000000  | H | 0.328554000000  | 3.898798000000  | -2.573834000000 |
| H | -5.628223000000 | 0.334846000000  | 4.307454000000  | H | 0.861036000000  | 2.615254000000  | -3.666225000000 |
| H | -4.727898000000 | -0.745481000000 | 5.379290000000  | H | 2.500611000000  | 5.250224000000  | -3.173321000000 |
| H | -4.139847000000 | 0.901859000000  | 5.091347000000  | H | 2.955199000000  | 3.936137000000  | -4.267962000000 |
| H | -6.211129000000 | -1.491704000000 | -0.933285000000 | H | 4.081917000000  | 4.478918000000  | -3.008748000000 |
| H | -8.314546000000 | -3.482503000000 | 0.088657000000  | C | 4.445819000000  | 2.760420000000  | 2.452680000000  |
| H | -8.509246000000 | -2.366297000000 | -1.272379000000 | H | 4.702940000000  | 1.771497000000  | 2.059686000000  |
| H | -8.356274000000 | -1.741559000000 | 0.382405000000  | C | 3.730545000000  | 2.546502000000  | 3.799229000000  |
| H | -4.935930000000 | -3.515527000000 | -1.652206000000 | C | 5.759259000000  | 3.544608000000  | 2.659039000000  |
| H | -6.299542000000 | -4.545455000000 | -1.177384000000 | H | 6.305521000000  | 3.684832000000  | 1.719020000000  |
| H | -6.504538000000 | -3.366247000000 | -2.478283000000 | H | 5.561324000000  | 4.539846000000  | 3.052600000000  |
| H | -4.034067000000 | 3.389384000000  | 1.102871000000  | H | 6.417281000000  | 3.014720000000  | 3.358365000000  |
| H | -4.807108000000 | 6.109288000000  | -0.107396000000 | H | 3.515661000000  | 3.499155000000  | 4.297301000000  |
| H | -5.247882000000 | 5.523914000000  | 1.505412000000  | H | 4.362126000000  | 1.958474000000  | 4.472585000000  |
| H | -5.926665000000 | 4.758050000000  | 0.056210000000  | H | 2.785027000000  | 2.012733000000  | 3.666834000000  |

```
Zero-point correction= 1.302494 (Hartree/Particle)
Thermal correction to Energy= 1.385674
Thermal correction to Enthalpy= 1.386619
Thermal correction to Gibbs Free Energy= 1.171490
Sum of electronic and zero-point Energies= -5654.268999
Sum of electronic and thermal Energies= -5654.185818
Sum of electronic and thermal Enthalpies= -5654.184874
Sum of electronic and thermal Free Energies= -5654.400003
CPCM (Benzene) PBE0-D3/def2TZVP E = -8902.69400066
CPCM (Benzene) M06L/def2TZVP E = -8906.46391884
CPCM (Benzene) M06/def2TZVP E = -8904.54841525
```

**TS-OA-I/SeCF<sub>3</sub>-PhI triplet (wB97XD opt.)**

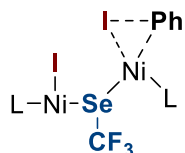

|    |                 |                 |                 |    |                 |                 |                 |
|----|-----------------|-----------------|-----------------|----|-----------------|-----------------|-----------------|
| Ni | 1.966459000000  | -0.404342000000 | 0.582048000000  | C  | -6.240665000000 | -3.041662000000 | 1.229267000000  |
| Ni | -2.037435000000 | -0.482728000000 | -0.098165000000 | C  | -5.618119000000 | -3.625186000000 | 2.323649000000  |
| C  | 3.538021000000  | 0.361694000000  | -0.448683000000 | C  | -3.203661000000 | 2.551464000000  | -1.219024000000 |
| C  | 5.392373000000  | 1.717893000000  | -0.906344000000 | C  | -3.312180000000 | 2.001302000000  | -2.512648000000 |
| C  | 5.304413000000  | 0.629067000000  | -1.969165000000 | C  | -2.554680000000 | 3.778863000000  | -0.998811000000 |
| C  | -3.585854000000 | 0.631198000000  | 0.278657000000  | C  | -2.715069000000 | 2.693707000000  | -3.568526000000 |
| C  | -5.147599000000 | 2.388062000000  | 0.353163000000  | C  | -2.014621000000 | 4.451446000000  | -2.094535000000 |
| C  | -5.501764000000 | 1.358185000000  | 1.424343000000  | C  | -2.076870000000 | 3.909531000000  | -3.369259000000 |
| N  | 4.246104000000  | -0.237166000000 | -1.426603000000 | C  | 2.823810000000  | -1.648666000000 | 1.905238000000  |
| N  | 4.127911000000  | 1.538695000000  | -0.176553000000 | C  | 4.219055000000  | -1.765926000000 | 1.904651000000  |
| N  | -4.584561000000 | 0.261720000000  | 1.101725000000  | C  | 2.118397000000  | -1.676101000000 | 3.114031000000  |
| N  | -3.839737000000 | 1.903269000000  | -0.112235000000 | C  | 4.903152000000  | -1.879444000000 | 3.107984000000  |
| C  | 3.801419000000  | -1.353371000000 | -2.213209000000 | C  | 2.815531000000  | -1.784173000000 | 4.315873000000  |
| C  | 2.650120000000  | -1.223810000000 | -3.014158000000 | C  | 4.202062000000  | -1.899610000000 | 4.315221000000  |
| C  | 4.566369000000  | -2.530702000000 | -2.200767000000 | Se | -0.084846000000 | 0.888378000000  | 0.387625000000  |
| C  | 2.257324000000  | -2.330043000000 | -3.767018000000 | C  | -0.265102000000 | 1.564849000000  | 2.199420000000  |
| C  | 4.140747000000  | -3.601137000000 | -2.986498000000 | F  | -0.018283000000 | 0.647593000000  | 3.158748000000  |
| C  | 2.988241000000  | -3.509756000000 | -3.752816000000 | F  | -1.505482000000 | 2.034134000000  | 2.443066000000  |
| C  | 3.558428000000  | 2.666087000000  | 0.509819000000  | F  | 0.585011000000  | 2.577486000000  | 2.441234000000  |
| C  | 3.747312000000  | 2.830560000000  | 1.889769000000  | I  | -2.263452000000 | -2.840511000000 | -1.074251000000 |
| C  | 2.920613000000  | 3.646912000000  | -0.273288000000 | C  | 5.833832000000  | -2.676688000000 | -1.374528000000 |
| C  | 3.293988000000  | 4.013789000000  | 2.475265000000  | C  | 7.075715000000  | -2.727296000000 | -2.277867000000 |
| C  | 2.478423000000  | 4.806245000000  | 0.361498000000  | C  | 5.787764000000  | -3.907998000000 | -0.457831000000 |
| C  | 2.666016000000  | 4.994076000000  | 1.722816000000  | C  | 1.854796000000  | 0.068578000000  | -3.134527000000 |
| C  | -4.881727000000 | -1.080179000000 | 1.506317000000  | C  | 0.337672000000  | -0.150712000000 | -3.122189000000 |
| C  | -4.217754000000 | -1.663805000000 | 2.593664000000  | C  | 2.278200000000  | 0.823982000000  | -4.404020000000 |
| C  | -5.883196000000 | -1.766596000000 | 0.795907000000  | C  | -3.102591000000 | -0.956920000000 | 3.342217000000  |
| C  | -4.612411000000 | -2.942549000000 | 2.990563000000  | C  | -1.853237000000 | -1.840957000000 | 3.449589000000  |

|   |                 |                 |                 |   |                 |                 |                 |
|---|-----------------|-----------------|-----------------|---|-----------------|-----------------|-----------------|
| C | -3.578313000000 | -0.493808000000 | 4.725905000000  | H | -2.821587000000 | -0.066279000000 | 2.775550000000  |
| C | -6.567170000000 | -1.184313000000 | -0.432198000000 | H | -2.055873000000 | -2.770308000000 | 3.993050000000  |
| C | -8.071202000000 | -0.980916000000 | -0.201310000000 | H | -1.069614000000 | -1.305094000000 | 3.992089000000  |
| C | -6.312947000000 | -2.056231000000 | -1.668901000000 | H | -1.479267000000 | -2.105733000000 | 2.453772000000  |
| C | -2.433217000000 | 4.398172000000  | 0.382633000000  | H | -4.460124000000 | 0.152020000000  | 4.645511000000  |
| C | -3.328260000000 | 5.639479000000  | 0.515874000000  | H | -3.847284000000 | -1.348635000000 | 5.358211000000  |
| C | -0.979149000000 | 4.752895000000  | 0.715475000000  | H | -2.786375000000 | 0.069179000000  | 5.232931000000  |
| C | -4.136413000000 | 0.760338000000  | -2.826575000000 | H | -6.128598000000 | -0.203620000000 | -0.641365000000 |
| C | -3.441226000000 | -0.196977000000 | -3.798972000000 | H | -8.579668000000 | -1.939599000000 | -0.047595000000 |
| C | -5.512024000000 | 1.181780000000  | -3.366753000000 | H | -8.528997000000 | -0.495915000000 | -1.071050000000 |
| H | 6.233459000000  | 1.563856000000  | -0.220553000000 | H | -8.267348000000 | -0.360347000000 | 0.680744000000  |
| H | 5.461689000000  | 2.724802000000  | -1.321012000000 | H | -5.239822000000 | -2.171366000000 | -1.849481000000 |
| H | 6.237504000000  | 0.076343000000  | -2.092913000000 | H | -6.738564000000 | -3.058187000000 | -1.543812000000 |
| H | 4.996114000000  | 1.014397000000  | -2.948229000000 | H | -6.779409000000 | -1.606090000000 | -2.552852000000 |
| H | -5.862700000000 | 2.390909000000  | -0.479502000000 | H | -2.756707000000 | 3.650607000000  | 1.111060000000  |
| H | -5.076474000000 | 3.401842000000  | 0.751171000000  | H | -2.999409000000 | 6.429253000000  | -0.170158000000 |
| H | -6.542272000000 | 1.029251000000  | 1.377836000000  | H | -3.281955000000 | 6.039813000000  | 1.535074000000  |
| H | -5.296810000000 | 1.724055000000  | 2.438260000000  | H | -4.375225000000 | 5.420034000000  | 2.079903000000  |
| H | 1.358064000000  | -2.269721000000 | -4.370990000000 | H | -0.312352000000 | 3.910527000000  | 0.521676000000  |
| H | 4.711845000000  | -4.525053000000 | -2.986978000000 | H | -0.629466000000 | 5.604467000000  | 0.118721000000  |
| H | 2.657897000000  | -4.358750000000 | -4.343406000000 | H | -0.882498000000 | 5.025742000000  | 1.771598000000  |
| H | 3.428490000000  | 4.168021000000  | 3.540595000000  | H | -4.291418000000 | 0.195032000000  | -1.905882000000 |
| H | 1.977291000000  | 5.574332000000  | -0.220118000000 | H | -3.346291000000 | 0.231120000000  | -4.804328000000 |
| H | 2.315296000000  | 5.904761000000  | 2.199055000000  | H | -4.023242000000 | -1.120121000000 | -3.883652000000 |
| H | -4.119946000000 | -3.414397000000 | 3.835560000000  | H | -2.449322000000 | -0.472213000000 | -3.432381000000 |
| H | -7.008499000000 | -3.592948000000 | 0.693634000000  | H | -6.052973000000 | 1.812735000000  | -2.652415000000 |
| H | -5.907249000000 | -4.620679000000 | 2.647486000000  | H | -5.406567000000 | 1.751526000000  | -4.291900000000 |
| H | -2.778727000000 | 2.285718000000  | -4.572414000000 | H | -6.126529000000 | 0.300025000000  | -3.576437000000 |
| H | -1.524638000000 | 5.409086000000  | -1.942588000000 | I | 1.576362000000  | -2.903692000000 | 0.182423000000  |
| H | -1.636225000000 | 4.438432000000  | -4.209723000000 | C | 2.716581000000  | 3.509266000000  | -1.774409000000 |
| H | 4.758805000000  | -1.763583000000 | 0.966264000000  | H | 3.083490000000  | 2.528106000000  | -2.087629000000 |
| H | 1.034593000000  | -1.646547000000 | 3.112993000000  | C | 3.513684000000  | 4.567845000000  | -2.550774000000 |
| H | 5.986418000000  | -1.961455000000 | 3.103141000000  | C | 1.230264000000  | 3.579636000000  | -2.138480000000 |
| H | 2.264657000000  | -1.798846000000 | 5.251467000000  | H | 0.650410000000  | 2.821626000000  | -1.604807000000 |
| H | 4.739006000000  | -2.009213000000 | 5.252726000000  | H | 0.808649000000  | 4.556650000000  | -1.881537000000 |
| H | 5.924193000000  | -1.790869000000 | -0.735611000000 | H | 1.086109000000  | 3.435547000000  | -3.214420000000 |
| H | 7.051809000000  | -3.615528000000 | -2.919198000000 | H | 3.144751000000  | 5.576427000000  | -2.332590000000 |
| H | 7.990286000000  | -2.771796000000 | -1.675811000000 | H | 3.413157000000  | 4.400815000000  | -3.629040000000 |
| H | 7.136518000000  | -1.852321000000 | -2.934441000000 | H | 4.580143000000  | 4.547876000000  | -2.299037000000 |
| H | 4.869815000000  | -3.933100000000 | 0.136760000000  | C | 4.449488000000  | 1.785703000000  | 2.736379000000  |
| H | 5.833208000000  | -4.835992000000 | -1.038010000000 | H | 4.408710000000  | 0.833396000000  | 2.201808000000  |
| H | 6.645011000000  | -3.904506000000 | 0.225120000000  | C | 3.759746000000  | 1.577652000000  | 4.088672000000  |
| H | 2.081352000000  | 0.701613000000  | -2.273673000000 | C | 5.928664000000  | 2.147184000000  | 2.933597000000  |
| H | -0.017782000000 | -0.601998000000 | -4.055768000000 | H | 6.444046000000  | 2.280348000000  | 1.976095000000  |
| H | -0.179733000000 | 0.809237000000  | -3.008477000000 | H | 6.028190000000  | 3.083161000000  | 3.496126000000  |
| H | 0.027489000000  | -0.808349000000 | -2.304072000000 | H | 6.442805000000  | 1.356882000000  | 3.492446000000  |
| H | 3.346065000000  | 1.070620000000  | -4.399903000000 | H | 3.846311000000  | 2.461455000000  | 4.730821000000  |
| H | 2.082877000000  | 0.215107000000  | -5.294321000000 | H | 4.227699000000  | 0.743118000000  | 4.616613000000  |
| H | 1.712568000000  | 1.756322000000  | -4.502229000000 | H | 2.698147000000  | 1.348890000000  | 3.959383000000  |

Zero-point correction= 1.320636 (Hartree/Particle)  
Thermal correction to Energy= 1.400890  
Thermal correction to Enthalpy= 1.401834  
Thermal correction to Gibbs Free Energy= 1.200411  
Sum of electronic and zero-point Energies= -5653.536076  
Sum of electronic and thermal Energies= -5653.455821  
Sum of electronic and thermal Enthalpies= -5653.454877  
Sum of electronic and thermal Free Energies= -5653.656301

### TS-OA-I/SeCF<sub>3</sub>-PhI singlet

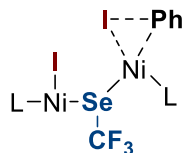

|    |             |             |             |   |             |             |             |
|----|-------------|-------------|-------------|---|-------------|-------------|-------------|
| Ni | 1.95177800  | -0.34907700 | -0.18074700 | N | -4.46906200 | -1.09087500 | 0.65963900  |
| Ni | -2.07126500 | -0.06124900 | -0.64033300 | N | -4.22913700 | 1.07122800  | 0.93201500  |
| C  | 3.38436200  | 0.81752700  | 0.33398300  | H | 5.18229700  | 3.09614500  | -0.40822900 |
| C  | 5.47037200  | 1.60031200  | 1.16206100  | H | 6.48594300  | 1.48995300  | 0.77933100  |
| C  | 4.72082700  | 2.76816400  | 0.53038000  | H | -6.53274800 | -0.69086700 | 0.38658600  |
| C  | -3.62369100 | -0.04231200 | 0.43418300  | H | -6.27259700 | 1.48146200  | 1.35441200  |
| C  | -5.49397500 | 0.77032900  | 1.63888100  | C | 2.33195400  | 3.04380400  | -0.19487300 |
| C  | -5.78258000 | -0.65523600 | 1.18464900  | C | 1.55235000  | 3.75128700  | 0.74982300  |
| N  | 3.39290100  | 2.17918400  | 0.26150900  | C | 2.14530800  | 3.23782800  | -1.58815100 |
| N  | 4.62660800  | 0.44816000  | 0.77603500  | C | 0.51699400  | 4.56296800  | 0.26101700  |



|   |             |             |             |    |             |             |             |
|---|-------------|-------------|-------------|----|-------------|-------------|-------------|
| C | 1.10407900  | 4.07060200  | -2.01202400 | H  | 4.71845300  | 4.07485700  | -2.20922200 |
| C | 0.27871700  | 4.71451400  | -1.09741700 | C  | 2.34343300  | 2.15206300  | -3.89840800 |
| H | -0.12109400 | 5.07718800  | 0.97445900  | H  | 3.03062000  | 1.57835000  | -4.53253400 |
| H | 0.93434300  | 4.21201000  | -3.07404800 | H  | 1.49068700  | 1.51738900  | -3.64433700 |
| H | -0.54369300 | 5.33513800  | -1.44183700 | H  | 1.97305100  | 2.98563500  | -4.50670800 |
| C | 5.14402200  | -0.87798100 | 0.99864500  | C  | -3.79385900 | -2.98862800 | 2.80607400  |
| C | 6.03582000  | -1.42766100 | 0.04146400  | H  | -3.70083000 | -1.90039200 | 2.84533600  |
| C | 4.86056400  | -1.55879900 | 2.20755700  | C  | -5.04370400 | -3.40244000 | 3.61667500  |
| C | 6.58419400  | -2.69156700 | 0.29473600  | H  | -5.97231100 | -3.00320000 | 3.19405000  |
| C | 5.44034500  | -2.81901200 | 2.40720100  | H  | -5.14366600 | -4.49418000 | 3.64258100  |
| C | 6.28605200  | -3.38842900 | 1.46114200  | H  | -4.96256200 | -3.04920400 | 4.65183600  |
| H | 7.26156500  | -3.13260100 | -0.43024200 | C  | -2.53980800 | -3.57909100 | 3.47698400  |
| H | 5.23309200  | -3.35811100 | 3.32644100  | H  | -1.63497000 | -3.35706400 | 2.91104400  |
| H | 6.72297700  | -4.36783900 | 1.63835200  | H  | -2.42402300 | -3.15515000 | 4.48142900  |
| C | -4.29611100 | -2.48373600 | 0.31497800  | H  | -2.61838600 | -4.66664200 | 3.59273800  |
| C | -4.61290100 | -2.93823500 | -0.99023100 | C  | -5.21760600 | -2.03915300 | -2.06750300 |
| C | -3.94790800 | -3.39713400 | 1.34206400  | H  | -4.97119800 | -1.00043700 | -1.82662400 |
| C | -4.46261500 | -4.30407400 | -1.26550100 | C  | -6.75759300 | -2.18641800 | -2.07700200 |
| C | -3.82656700 | -4.75274200 | 1.00999900  | H  | -7.20183600 | -1.49328400 | -2.80141400 |
| C | -4.06155100 | -5.20428500 | -0.28424500 | H  | -7.04355300 | -3.20459000 | -2.36744400 |
| H | -4.68228800 | -4.67013600 | -2.26296400 | H  | -7.20731200 | -1.98982000 | -1.09825200 |
| H | -3.55340500 | -5.46597900 | 1.78182100  | C  | -4.68084100 | -2.32281000 | -3.48212100 |
| H | -3.95662800 | -6.25968100 | -0.52275100 | H  | -5.04378900 | -1.55384200 | -4.17305900 |
| C | -3.80351000 | 2.44926600  | 0.87413800  | H  | -3.58962000 | -2.30292500 | -3.51329100 |
| C | -3.30943700 | 3.05951500  | 2.04950700  | H  | -5.03005500 | -3.29096000 | -3.86166100 |
| C | -4.04246600 | 3.20160000  | -0.30282200 | C  | -4.65623000 | 2.59228200  | -1.56238000 |
| C | -3.05192000 | 4.43653200  | 2.02459900  | H  | -4.38640700 | 1.53308600  | -1.58894900 |
| C | -3.75312300 | 4.57145900  | -0.27323600 | C  | -6.19665000 | 2.69926200  | -1.53226300 |
| C | -3.27002400 | 5.18931100  | 0.87684500  | H  | -6.51339000 | 3.74918300  | -1.50321700 |
| H | -2.67920000 | 4.92263200  | 2.92209500  | H  | -6.62742500 | 2.24254900  | -2.43141600 |
| H | -3.92375100 | 5.16816400  | -1.16302500 | H  | -6.63348700 | 2.19863300  | -0.66142700 |
| H | -3.07042100 | 6.25813500  | 0.87783800  | C  | -4.11928400 | 3.21245100  | -2.86412900 |
| C | 1.73943000  | 3.82570300  | 2.27354500  | H  | -4.47482600 | 4.24043700  | -3.00824200 |
| H | 0.72062700  | 3.92941300  | 2.66615100  | H  | -3.02642100 | 3.20912000  | -2.88632900 |
| C | 2.47840100  | 5.13020200  | 2.65334300  | H  | -4.46663600 | 2.62361200  | -3.71975200 |
| H | 2.50444900  | 5.24959700  | 3.74355300  | C  | -3.06523800 | 2.29382600  | 3.34688900  |
| H | 3.51543800  | 5.12553500  | 2.29580100  | H  | -3.22328600 | 1.23127500  | 3.14919400  |
| H | 1.98740000  | 6.00991900  | 2.22449300  | C  | -4.04290000 | 2.73432300  | 4.45634100  |
| C | 2.34933900  | 2.63272800  | 3.02141900  | H  | -5.08980400 | 2.62301800  | 4.15161000  |
| H | 3.43344400  | 2.56535200  | 2.89547700  | H  | -3.88696500 | 2.13862500  | 5.36386800  |
| H | 2.16177300  | 2.75830900  | 4.09521300  | H  | -3.89046100 | 3.78769200  | 4.71983200  |
| H | 1.90366400  | 1.68799200  | 2.71147000  | C  | -1.60981700 | 2.43649700  | 3.82808900  |
| C | 4.01370400  | -0.95186900 | 3.32269500  | H  | -0.91187000 | 2.15993600  | 3.03438300  |
| H | 3.43566100  | -0.12739700 | 2.89964200  | H  | -1.38913700 | 3.46453900  | 4.14016000  |
| C | 4.91917400  | -0.38133800 | 4.43690800  | H  | -1.42717200 | 1.78115400  | 4.68719700  |
| H | 5.49666100  | -1.18023800 | 4.91818000  | I  | 2.41452200  | -1.34798400 | -2.66184400 |
| H | 5.63474700  | 0.35401000  | 4.02554400  | C  | 1.57993100  | -2.54343900 | -0.98157100 |
| H | 4.31199100  | 0.10671100  | 5.20853800  | C  | 2.48272100  | -3.15931300 | -0.10648400 |
| C | 3.00636400  | -1.94653600 | 3.92799200  | C  | 0.25480700  | -2.98458500 | -1.09802200 |
| H | 2.36686200  | -2.38719200 | 3.15969600  | C  | 2.01949600  | -4.19400000 | 0.71733500  |
| H | 3.50843000  | -2.75682800 | 4.47002000  | H  | 3.52517000  | -2.86846000 | -0.08227700 |
| H | 2.35982900  | -1.42722100 | 4.64242100  | C  | -0.18225300 | -4.01736300 | -0.27262600 |
| C | 6.47378100  | -0.67892900 | -1.21674000 | H  | -0.42065100 | -2.51394000 | -1.80453000 |
| H | 5.79116900  | 0.16524200  | -1.35719900 | C  | 0.69735100  | -4.62505600 | 0.63315500  |
| C | 7.90953800  | -0.12849000 | -1.05710200 | H  | 2.71339800  | -4.66842500 | 1.40605300  |
| H | 8.02673900  | 0.49524300  | -0.16465400 | H  | -1.21496600 | -4.34706500 | -0.33932000 |
| H | 8.62959500  | -0.95127600 | -0.97375600 | H  | 0.34977700  | -5.44053100 | 1.26181500  |
| H | 8.18860600  | 0.47271300  | -1.93069100 | H  | 5.52389100  | 1.67467600  | 2.25508800  |
| C | 6.40838600  | -1.54100900 | -2.49238500 | H  | 4.63798100  | 3.63415100  | 1.19018000  |
| H | 5.42081000  | -1.98808800 | -2.62653700 | H  | -6.11314000 | -1.30434600 | 1.99649400  |
| H | 6.62359700  | -0.92065800 | -3.37071600 | H  | -5.34816700 | 0.83785400  | 2.72302000  |
| H | 7.15166800  | -2.34647200 | -2.47606700 | Se | -0.14981800 | 0.37194300  | 0.63294600  |
| C | 3.08244600  | 2.65169100  | -2.64217000 | C  | -0.30308200 | -0.63666700 | 2.31456100  |
| H | 3.60030500  | 1.79485100  | -2.20055500 | F  | -1.55924300 | -0.60286900 | 2.82951900  |
| C | 4.14463600  | 3.69438600  | -3.06099800 | F  | 0.50908700  | -0.12441000 | 3.27548600  |
| H | 4.85009100  | 3.25714600  | -3.77853100 | F  | 0.02871600  | -1.94230900 | 2.19950900  |
| H | 3.66753500  | 4.55619600  | -3.54308200 | I  | -1.67936800 | 0.07785500  | -3.15832900 |

Zero-point correction= 1.304845 (Hartree/Particle)  
Thermal correction to Energy= 1.386723  
Thermal correction to Enthalpy= 1.387667  
Thermal correction to Gibbs Free Energy= 1.180755  
Sum of electronic and zero-point Energies= -5654.206184  
Sum of electronic and thermal Energies= -5654.124307  
Sum of electronic and thermal Enthalpies= -5654.123363  
Sum of electronic and thermal Free Energies= -5654.330274  
CPCM (Benzene) PBE0-D3/def2TZVP E = -8902.6405197  
CPCM (Benzene) M06L/def2TZVP E = -8906.44812409  
CPCM (Benzene) M06/def2TZVP E = -8904.51185731

TS-OA-I/SeCF<sub>3</sub>-PhI *singlet* (wB97XD opt.)

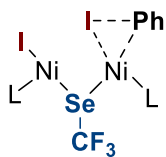

|    |                 |                 |                 |    |                 |                 |                 |
|----|-----------------|-----------------|-----------------|----|-----------------|-----------------|-----------------|
| Ni | 1.427549000000  | -0.170432000000 | -0.163090000000 | H  | 6.867214000000  | 1.164290000000  | -2.879340000000 |
| Ni | -1.351099000000 | -0.182230000000 | -0.227274000000 | C  | 5.649312000000  | -1.182037000000 | -3.202931000000 |
| C  | 3.091992000000  | 0.876790000000  | 0.199370000000  | H  | 4.906163000000  | -1.982689000000 | -3.177748000000 |
| C  | 5.138748000000  | 1.717674000000  | 1.000032000000  | H  | 5.429137000000  | -0.540366000000 | -4.063180000000 |
| C  | 4.373668000000  | 2.849616000000  | 0.342232000000  | H  | 6.634780000000  | -1.630077000000 | -3.377224000000 |
| C  | -3.211949000000 | -0.180282000000 | 0.183338000000  | C  | 2.545798000000  | 2.639683000000  | -2.670391000000 |
| C  | -5.422287000000 | 0.574852000000  | 0.487038000000  | H  | 3.134694000000  | 1.814206000000  | -2.259050000000 |
| C  | -5.452471000000 | -0.878480000000 | 0.045814000000  | C  | 3.513155000000  | 3.760266000000  | -3.092024000000 |
| N  | 3.054797000000  | 2.230642000000  | 0.172530000000  | H  | 4.247373000000  | 3.383898000000  | -3.814145000000 |
| N  | 4.364292000000  | 0.553008000000  | 0.545407000000  | H  | 2.959167000000  | 4.578336000000  | -3.567378000000 |
| N  | -4.033549000000 | -1.254561000000 | 0.111843000000  | H  | 4.053458000000  | 4.186770000000  | -2.241343000000 |
| N  | -3.993719000000 | 0.904813000000  | 0.384069000000  | C  | 1.807679000000  | 2.115380000000  | -3.908901000000 |
| H  | 4.797187000000  | 3.109843000000  | -0.635827000000 | H  | 2.503593000000  | 1.563223000000  | -4.551596000000 |
| H  | 6.182284000000  | 1.646861000000  | 0.694191000000  | H  | 0.978790000000  | 1.454742000000  | -3.640023000000 |
| H  | -5.815115000000 | -0.981693000000 | -0.981844000000 | H  | 1.402496000000  | 2.937500000000  | -4.510462000000 |
| H  | -6.012411000000 | 1.223332000000  | -0.161524000000 | C  | -3.178325000000 | -2.442431000000 | 2.636729000000  |
| C  | 1.916752000000  | 3.012152000000  | -0.208967000000 | H  | -2.552542000000 | -1.600154000000 | 2.328694000000  |
| C  | 1.140017000000  | 3.638274000000  | 0.779827000000  | C  | -4.457710000000 | -1.871090000000 | 3.265079000000  |
| C  | 1.612236000000  | 3.144478000000  | -1.581436000000 | H  | -4.965104000000 | -1.165840000000 | 2.602962000000  |
| C  | -0.009620000000 | 4.316168000000  | 0.360466000000  | H  | -5.160681000000 | -2.673965000000 | 3.517061000000  |
| C  | 0.462112000000  | 3.841726000000  | -1.940454000000 | H  | -4.211573000000 | -1.333456000000 | 4.187393000000  |
| C  | -0.356957000000 | 4.408451000000  | -0.974966000000 | C  | -2.398116000000 | -3.222132000000 | 3.700307000000  |
| H  | -0.652677000000 | 4.768832000000  | 1.109282000000  | H  | -1.503106000000 | -3.688056000000 | 3.278508000000  |
| H  | 0.195933000000  | 3.934867000000  | -2.988091000000 | H  | -2.078531000000 | -2.539581000000 | 4.490819000000  |
| H  | -1.265412000000 | 4.925901000000  | -1.263439000000 | H  | -3.015360000000 | -3.998839000000 | 4.166943000000  |
| C  | 4.978736000000  | -0.736723000000 | 0.539548000000  | C  | -4.279494000000 | -2.832106000000 | -2.369732000000 |
| C  | 5.597593000000  | -1.183144000000 | -0.647891000000 | H  | -4.138725000000 | -1.749754000000 | -2.305416000000 |
| C  | 5.026412000000  | -1.487975000000 | 1.726745000000  | C  | -5.731778000000 | -3.126229000000 | -2.778599000000 |
| C  | 6.225342000000  | -2.429199000000 | -0.625004000000 | H  | -5.969918000000 | -2.618012000000 | -3.719521000000 |
| C  | 5.680363000000  | -2.721497000000 | 1.698421000000  | H  | -5.885478000000 | -4.201265000000 | -2.930318000000 |
| C  | 6.264778000000  | -3.194527000000 | 0.533269000000  | H  | -6.450972000000 | -2.798626000000 | -2.020133000000 |
| H  | 6.693661000000  | -2.811027000000 | -1.525901000000 | C  | -3.316563000000 | -3.340880000000 | -3.450622000000 |
| H  | 5.731055000000  | -3.321813000000 | 2.601451000000  | H  | -3.484684000000 | -2.795531000000 | -4.385002000000 |
| H  | 6.759499000000  | -4.161295000000 | 0.526775000000  | H  | -2.274619000000 | -3.182305000000 | -3.162104000000 |
| C  | -3.745527000000 | -2.661522000000 | 0.142536000000  | H  | -3.464523000000 | -4.408562000000 | -3.651937000000 |
| C  | -3.962805000000 | -3.434177000000 | -1.011563000000 | C  | -4.278695000000 | 2.805725000000  | -1.824573000000 |
| C  | -3.463537000000 | -3.265667000000 | 1.388175000000  | H  | -4.214042000000 | 1.716850000000  | -1.903595000000 |
| C  | -3.922912000000 | -4.827455000000 | -0.893009000000 | C  | -5.725549000000 | 3.239642000000  | -2.111464000000 |
| C  | -3.452442000000 | -4.658415000000 | 1.452958000000  | H  | -5.812755000000 | 4.332755000000  | -1.229280000000 |
| C  | -3.693719000000 | -5.437862000000 | 0.327858000000  | H  | -6.043325000000 | 2.868548000000  | -3.092110000000 |
| H  | -4.094623000000 | -5.438218000000 | -1.774367000000 | H  | -6.432761000000 | 2.867904000000  | -1.361903000000 |
| H  | -3.245484000000 | -5.149820000000 | 2.396388000000  | C  | -3.340865000000 | 3.385983000000  | -2.891170000000 |
| H  | -3.685342000000 | -6.521248000000 | 0.405546000000  | H  | -3.427834000000 | 4.478331000000  | -2.951870000000 |
| C  | -3.643776000000 | 2.279499000000  | 0.615711000000  | H  | -2.302285000000 | 3.121619000000  | -2.682157000000 |
| C  | -3.314757000000 | 2.704963000000  | 1.920794000000  | H  | -3.595624000000 | 2.974494000000  | -3.873466000000 |
| C  | -3.852279000000 | 3.208070000000  | -0.422244000000 | C  | -3.211324000000 | 1.759063000000  | 3.109872000000  |
| C  | -3.176109000000 | 4.075289000000  | 2.147829000000  | H  | -3.032277000000 | 0.747276000000  | 2.733652000000  |
| C  | -3.713759000000 | 4.567243000000  | -0.134793000000 | C  | -4.523399000000 | 1.760934000000  | 3.912866000000  |
| C  | -3.379584000000 | 5.003266000000  | 1.136707000000  | H  | -5.390006000000 | 1.492064000000  | 3.302531000000  |
| H  | -2.931718000000 | 4.427993000000  | 3.144555000000  | H  | -4.463116000000 | 1.049291000000  | 4.743524000000  |
| H  | -3.884042000000 | 5.295471000000  | -0.922867000000 | H  | -4.711753000000 | 2.756373000000  | 4.332093000000  |
| H  | -3.281330000000 | 6.065387000000  | 1.343031000000  | C  | -2.055576000000 | 2.115807000000  | 4.054071000000  |
| C  | 1.426926000000  | 3.753109000000  | 2.280568000000  | H  | -1.107242000000 | 2.169065000000  | 3.514017000000  |
| H  | 0.443325000000  | 3.654652000000  | 2.756941000000  | H  | -2.225460000000 | 3.073190000000  | 4.558759000000  |
| C  | 1.933156000000  | 5.176741000000  | 2.578998000000  | H  | -1.961559000000 | 1.352244000000  | 4.830580000000  |
| H  | 2.066990000000  | 5.318961000000  | 3.657576000000  | I  | 1.972557000000  | -1.221799000000 | -2.458329000000 |
| H  | 2.901365000000  | 5.352349000000  | 2.093635000000  | C  | 1.264055000000  | -2.331176000000 | -0.658565000000 |
| H  | 1.237779000000  | 5.938934000000  | 2.214727000000  | C  | 2.251239000000  | -2.865065000000 | 0.169653000000  |
| C  | 2.339591000000  | 2.743380000000  | 2.982859000000  | C  | -0.002153000000 | -2.924469000000 | -0.738383000000 |
| H  | 3.397395000000  | 2.947488000000  | 2.796302000000  | C  | 1.936899000000  | -3.950562000000 | 0.989640000000  |
| H  | 2.187420000000  | 2.835213000000  | 4.064418000000  | H  | 3.256803000000  | -2.469958000000 | 0.150797000000  |
| H  | 2.126358000000  | 1.712675000000  | 2.705271000000  | C  | -0.293074000000 | -4.004900000000 | 0.079306000000  |
| C  | 4.426109000000  | -0.980869000000 | 3.027286000000  | H  | -0.736672000000 | -2.557010000000 | -1.445779000000 |
| H  | 3.729505000000  | -0.172466000000 | 2.784613000000  | C  | 0.670669000000  | -4.518568000000 | 0.950563000000  |
| C  | 5.530932000000  | -0.420231000000 | 3.938089000000  | H  | 2.707864000000  | -4.357970000000 | 1.637699000000  |
| H  | 6.210837000000  | -1.220537000000 | 4.254084000000  | H  | -1.272354000000 | -4.463184000000 | 0.012555000000  |
| H  | 6.134657000000  | 0.339966000000  | 3.431647000000  | H  | 0.434728000000  | -5.376481000000 | 1.573565000000  |
| H  | 5.094905000000  | 0.029304000000  | 4.837081000000  | H  | 5.102821000000  | 1.778416000000  | 2.094149000000  |
| C  | 3.629819000000  | -2.058317000000 | 3.772430000000  | H  | 4.310410000000  | 3.753474000000  | 0.951518000000  |
| H  | 2.835877000000  | -2.468619000000 | 3.144571000000  | H  | -6.052217000000 | -1.522473000000 | 0.693724000000  |
| H  | 4.274036000000  | -2.879679000000 | 4.106302000000  | H  | -5.766085000000 | 0.715724000000  | 1.516642000000  |
| H  | 3.164123000000  | -1.626206000000 | 4.662652000000  | Se | -0.056289000000 | 0.565639000000  | 1.379294000000  |
| C  | 5.631065000000  | -0.341826000000 | -1.918695000000 | C  | 0.151627000000  | -0.669595000000 | 2.877839000000  |
| H  | 4.724652000000  | 0.270346000000  | -1.935583000000 | F  | -0.894326000000 | -0.576290000000 | 3.725382000000  |
| C  | 6.843696000000  | 0.604249000000  | -1.937571000000 | F  | 1.242622000000  | -0.337682000000 | 3.596710000000  |
| H  | 6.824047000000  | 1.331378000000  | -1.122789000000 | F  | 0.268571000000  | -1.957409000000 | 2.550484000000  |
| H  | 7.777522000000  | 0.035766000000  | -1.857766000000 | I  | -1.752370000000 | 0.032450000000  | -2.741027000000 |

|                                              |                             |
|----------------------------------------------|-----------------------------|
| Zero-point correction=                       | 1.326785 (Hartree/Particle) |
| Thermal correction to Energy=                | 1.404452                    |
| Thermal correction to Enthalpy=              | 1.405396                    |
| Thermal correction to Gibbs Free Energy=     | 1.215483                    |
| Sum of electronic and zero-point Energies=   | -5653.462584                |
| Sum of electronic and thermal Energies=      | -5653.384917                |
| Sum of electronic and thermal Enthalpies=    | -5653.383973                |
| Sum of electronic and thermal Free Energies= | -5653.573886                |

**post-OA-I/SeCF<sub>3</sub> triplet**

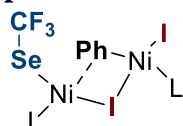

|    |             |             |             |   |             |             |             |
|----|-------------|-------------|-------------|---|-------------|-------------|-------------|
| Ni | 2.11126200  | -0.60693200 | -0.43679200 | H | 2.94096100  | -0.06166000 | 2.51773100  |
| Ni | -1.91494100 | -0.33363200 | -0.57629200 | C | 3.85551900  | -0.39309700 | 4.42907500  |
| C  | 3.71579300  | 0.48129300  | 0.15874200  | H | 4.08415600  | -1.21543100 | 5.11805400  |
| C  | 5.79072300  | 0.94527100  | 1.19861000  | H | 4.79872500  | 0.11530500  | 4.19994600  |
| C  | 5.38561100  | 2.14008000  | 0.34395100  | H | 3.20536200  | 0.31781600  | 4.95337100  |
| C  | -3.55282200 | -0.06724300 | 0.63523100  | C | 1.81866400  | -1.57234900 | 3.51269600  |
| C  | -5.40953300 | 1.02384600  | 1.57869400  | H | 1.31863100  | -1.97750800 | 2.62822400  |
| C  | -5.79440500 | -0.42742700 | 1.28066500  | H | 1.93554300  | -2.38129900 | 4.24357300  |
| N  | 3.99576500  | 1.79795500  | -0.02722500 | H | 1.15476300  | -0.82397900 | 3.95864300  |
| N  | 4.78147200  | -0.06548100 | 0.80915900  | C | 6.92971800  | -1.80016600 | -0.28578700 |
| N  | -4.59075300 | -0.93637900 | 0.58101800  | H | 6.54985800  | -0.87985400 | -0.74086600 |
| N  | -3.95113500 | 1.04256700  | 1.30021500  | C | 8.30357900  | -1.51439400 | 0.36711800  |
| H  | 5.99703200  | 2.22758300  | -0.56259400 | H | 8.24293100  | -0.81253400 | 1.20614700  |
| H  | 6.80101800  | 0.60019900  | 0.98598700  | H | 8.73994900  | -2.44140300 | 0.75787200  |
| H  | -6.67164900 | -0.50839300 | 0.63603800  | H | 9.00171300  | -1.10364900 | -0.37239000 |
| H  | -5.90983800 | 1.73142900  | 0.90969600  | C | 7.13042200  | -2.81621600 | -1.42713200 |
| C  | 3.18981100  | 2.80562900  | -0.67852900 | H | 6.17919500  | -3.08780000 | -1.88866400 |
| C  | 2.54794900  | 3.80016700  | 0.10159700  | H | 7.77453400  | -2.37773000 | -2.19878400 |
| C  | 3.13166800  | 2.84018600  | -2.09598400 | H | 7.62397400  | -3.72979900 | -1.07491000 |
| C  | 1.76953200  | 4.75244200  | -0.57575400 | C | 3.96709500  | 1.92619100  | -2.98849100 |
| C  | 2.34070500  | 3.81981900  | -2.70779600 | H | 4.28620500  | 1.05922600  | -2.40629300 |
| C  | 1.64803400  | 4.76196500  | -1.95815100 | C | 5.23259100  | 2.66913500  | -3.47332600 |
| H  | 1.24704500  | 5.50486200  | 0.01024600  | H | 5.86319400  | 1.99652300  | -4.06704600 |
| H  | 2.27524900  | 3.84693800  | -3.79033300 | H | 4.96739400  | 3.52696800  | -4.10355300 |
| H  | 1.02781700  | 5.50712500  | -2.44911600 | H | 5.83378900  | 3.05012600  | -2.63961600 |
| C  | 4.91519900  | -1.41375300 | 1.31132300  | C | 3.18742000  | 1.38184600  | -4.19906400 |
| C  | 5.92207700  | -2.25462000 | 0.77073800  | H | 3.78935800  | 0.62626600  | -4.71387200 |
| C  | 4.10969000  | -1.84833900 | 2.39274900  | H | 2.25422700  | 0.90280400  | -3.89080500 |
| C  | 6.04435800  | -3.55130700 | 1.28346900  | H | 2.95158300  | 2.17029700  | -4.92432000 |
| C  | 4.27049800  | -3.16162900 | 2.85486600  | C | -3.36116300 | -2.81144900 | 2.53623900  |
| C  | 5.21762900  | -4.01394900 | 2.30063800  | H | -3.24563700 | -1.72644300 | 2.52217000  |
| H  | 6.80031500  | -4.21220300 | 0.87148300  | C | -4.31529800 | -3.17067800 | 3.69646200  |
| H  | 3.65710700  | -3.51365200 | 3.67845400  | H | -5.31336700 | -2.73935300 | 3.55772000  |
| H  | 5.32514900  | -5.02931800 | 2.67346600  | H | -4.43702600 | -4.25698600 | 3.78001900  |
| C  | -4.53749900 | -2.35152000 | 0.26453400  | H | -3.91567700 | -2.80488900 | 4.64979400  |
| C  | -5.19254100 | -2.83217400 | -0.89491900 | C | -1.96267400 | -3.40106400 | 2.79565500  |
| C  | -3.95872600 | -3.24748700 | 1.20086700  | H | -1.26636300 | -3.14928600 | 1.99155500  |
| C  | -5.21939800 | -4.21578300 | -1.11364100 | H | -1.55992000 | -3.00485800 | 3.73430400  |
| C  | -4.01243300 | -4.61891800 | 0.92345700  | H | -1.99091100 | -4.49291700 | 2.88842100  |
| C  | -4.63361500 | -5.10504100 | -0.22079600 | C | -5.91906300 | -1.92904100 | -1.88503700 |
| H  | -5.71811000 | -4.60015200 | -1.99789900 | H | -5.66401500 | -0.89511900 | -1.65046100 |
| H  | -3.57276400 | -5.31810000 | 1.62799000  | C | -7.44974600 | -2.08745800 | -1.75037900 |
| H  | -4.67013700 | -6.17463200 | -0.41058800 | H | -7.96324000 | -1.38594400 | -2.41805400 |
| C  | -3.16879800 | 2.10435000  | 1.91591800  | H | -7.76792600 | -3.10148100 | -2.02081200 |
| C  | -2.81439700 | 1.95341800  | 3.27998900  | H | -7.79769600 | -1.89919500 | -0.72777400 |
| C  | -2.90093100 | 3.30904000  | 1.22746800  | C | -5.48905100 | -2.18768200 | -3.34170100 |
| C  | -2.14176900 | 3.00381700  | 3.91456700  | H | -6.00013700 | -1.48835800 | -4.00957400 |
| C  | -2.23273600 | 4.33033700  | 1.91623800  | H | -4.41291300 | -2.03942300 | -3.46818900 |
| C  | -1.84577800 | 4.18399700  | 3.24223300  | H | -5.74170900 | -3.20345700 | -3.66698700 |
| H  | -1.85461400 | 2.89604700  | 4.95658800  | C | -3.34761600 | 3.56122700  | -0.20241500 |
| H  | -2.01967900 | 5.25939200  | 1.39767600  | H | -3.58809700 | 2.59572300  | -0.64019400 |
| H  | -1.33003600 | 4.99155000  | 3.75542800  | C | -4.62700600 | 4.42414600  | -0.23410400 |
| C  | 2.63974900  | 4.05888500  | 1.61814400  | H | -4.43244500 | 5.43201400  | 0.15310100  |
| H  | 1.64186200  | 4.42862800  | 1.88806700  | H | -4.99024900 | 4.51579500  | -1.26288700 |
| C  | 3.61970500  | 5.22406500  | 1.89361300  | H | -5.43007400 | 3.98833500  | 0.37188800  |
| H  | 3.59561500  | 5.49955900  | 2.95511200  | C | -2.24737300 | 4.19514600  | -1.07216700 |
| H  | 4.65261200  | 4.95113100  | 1.64541000  | H | -2.02195600 | 5.22307900  | -0.76258200 |
| H  | 3.36506000  | 6.11067100  | 1.30425100  | H | -1.32358800 | 3.61179600  | -1.02979400 |
| C  | 2.91390400  | 2.90223400  | 2.58801200  | H | -2.57931600 | 4.22839800  | -2.11338900 |
| H  | 3.94654700  | 2.54747100  | 2.55284800  | C | -3.15216500 | 0.72141200  | 4.11410800  |
| H  | 2.73473600  | 3.25690800  | 3.61084800  | H | -3.68474200 | 0.00997400  | 3.47909700  |
| H  | 2.24811300  | 2.05651300  | 2.40951300  | C | -4.08918500 | 1.06995200  | 5.28938700  |
| C  | 3.16454500  | -0.92059600 | 3.15216800  | H | -5.00726700 | 1.56078400  | 4.94538800  |

|   |             |             |             |    |             |             |             |
|---|-------------|-------------|-------------|----|-------------|-------------|-------------|
| H | -4.37314700 | 0.16119200  | 5.83325700  | H  | -0.29373400 | -5.00770100 | 0.06017100  |
| H | -3.60421700 | 1.74580500  | 6.00265000  | H  | -1.95986900 | -2.43694500 | -2.95544700 |
| C | -1.88093900 | 0.01381200  | 4.62062000  | H  | -2.00195900 | -4.59438100 | -1.70397800 |
| H | -1.22679400 | -0.26342500 | 3.78842700  | H  | 5.71665000  | 1.14645500  | 2.27493000  |
| H | -1.30801500 | 0.65967800  | 5.29595400  | H  | 5.42701900  | 3.09041300  | 0.87854400  |
| H | -2.14279800 | -0.89477600 | 5.17612500  | H  | -5.97453800 | -1.02005100 | 2.18533300  |
| C | 0.70701900  | -1.85463200 | -0.84939800 | H  | -5.60623400 | 1.32128400  | 2.61092100  |
| C | 0.65520000  | -3.08949000 | -0.16925600 | I  | 0.15345200  | 0.84853700  | 0.69219200  |
| C | -0.29280700 | -1.63377200 | -1.83198100 | I  | 3.46088800  | -1.89533100 | -2.25528200 |
| C | -0.30330600 | -4.05870200 | -0.47276100 | Se | -2.57171500 | 0.61876000  | -2.73543300 |
| H | 1.41450100  | -3.32295000 | 0.57431700  | C  | -4.35236500 | 1.41740500  | -2.85391400 |
| C | -1.25081600 | -2.62399600 | -2.15430800 | F  | -5.11632800 | 1.29862000  | -1.72339400 |
| H | -0.18721800 | -0.77628000 | -2.49628300 | F  | -5.07378900 | 0.85917300  | -3.85025600 |
| C | -1.26508200 | -3.83398600 | -1.46597900 | F  | -4.30946200 | 2.74328600  | -3.12839800 |

Zero-point correction= 1.305626 (Hartree/Particle)  
 Thermal correction to Energy= 1.388148  
 Thermal correction to Enthalpy= 1.389092  
 Thermal correction to Gibbs Free Energy= 1.179479  
 Sum of electronic and zero-point Energies= -5654.258739  
 Sum of electronic and thermal Energies= -5654.176217  
 Sum of electronic and thermal Enthalpies= -5654.175273  
 Sum of electronic and thermal Free Energies= -5654.384886  
 CPCM (Benzene) PBE0-D3/def2TZVP E = -8902.70288706  
 CPCM (Benzene) M06L/def2TZVP E = -8906.48379898

### post-OA-I/SeCF<sub>3</sub> singlet

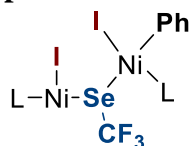

|    |             |             |             |   |             |             |             |
|----|-------------|-------------|-------------|---|-------------|-------------|-------------|
| Ni | 1.91726000  | -0.65124000 | -0.18965400 | C | -4.07814000 | 3.09446400  | 0.02128200  |
| Ni | -1.99321200 | -0.05626900 | -0.69673700 | C | -3.26985100 | 4.19212900  | 2.48217500  |
| C  | 3.19339000  | 0.88421600  | 0.29026200  | C | -3.87534500 | 4.47262200  | 0.17328900  |
| C  | 5.17104100  | 1.87708800  | 1.14674100  | C | -3.47155500 | 5.02179200  | 1.38498700  |
| C  | 4.36311700  | 2.94165600  | 0.41584200  | H | -2.97783200 | 4.62630800  | 3.43391000  |
| C  | -3.51918800 | -0.16895600 | 0.44397500  | H | -4.05791500 | 5.12878100  | -0.67154700 |
| C  | -5.49515300 | 0.44287900  | 1.55983400  | H | -3.33137600 | 6.09568600  | 1.47775000  |
| C  | -5.41736800 | -1.07698100 | 1.48783600  | C | 1.18476500  | 3.75933600  | 2.01716700  |
| N  | 3.09900400  | 2.23030600  | 0.12552900  | H | 0.13903300  | 3.74962700  | 2.35080300  |
| N  | 4.42620700  | 0.63826700  | 0.82186000  | C | 1.74848300  | 5.15057900  | 2.39321100  |
| N  | -4.27098500 | -1.28860000 | 0.57194900  | H | 1.70549100  | 5.29942900  | 3.47928800  |
| N  | -4.15131700 | 0.84874300  | 1.08025900  | H | 2.79645700  | 5.25316000  | 2.08517200  |
| H  | 4.83791000  | 3.25283200  | -0.52087200 | H | 1.18500000  | 5.95733600  | 1.91385100  |
| H  | 6.20105700  | 1.81612300  | 0.79872700  | C | 1.89560900  | 2.67827200  | 2.83997200  |
| H  | -6.31894500 | -1.54523600 | 1.08942300  | H | 2.98289200  | 2.71682500  | 2.73831000  |
| H  | -6.26018000 | 0.86111700  | 0.89510500  | H | 1.66861800  | 2.83974200  | 3.90123400  |
| C  | 1.99915900  | 3.00272800  | -0.40454000 | H | 1.55711100  | 1.67655600  | 2.57717300  |
| C  | 1.09989200  | 3.64006400  | 0.48497400  | C | 3.68053600  | -0.70989400 | 3.37538100  |
| C  | 1.91026800  | 3.21403300  | -1.82630300 | H | 3.01906100  | -0.02748700 | 2.83659100  |
| C  | 0.03783700  | 4.36885300  | -0.07434900 | C | 4.40244300  | 0.09792400  | 4.47732400  |
| C  | 0.84253800  | 3.97296700  | -2.29849600 | H | 5.05410600  | -0.55581000 | 5.06991500  |
| C  | -0.10347000 | 4.52832600  | -1.44558800 | H | 5.02772400  | 0.89640600  | 4.06440200  |
| H  | -0.68696200 | 4.82606200  | 0.59362000  | H | 3.67407400  | 0.55547700  | 5.15769500  |
| H  | 0.75336000  | 4.12749300  | -3.36841300 | C | 2.79545700  | -1.78639900 | 4.03104400  |
| H  | -0.93770400 | 5.09755700  | -1.84703000 | H | 2.28626500  | -2.40323600 | 3.28565300  |
| C  | 5.04596500  | -0.62206400 | 1.17379100  | H | 3.37573700  | -2.44683700 | 4.68540600  |
| C  | 6.10737500  | -1.11164400 | 0.36675100  | C | 2.03188300  | -1.30801300 | 4.65125200  |
| C  | 4.69432600  | -1.27551800 | 2.38244700  | C | 6.64475800  | -0.39130300 | -0.87039100 |
| C  | 6.74750300  | -2.29303400 | 0.76081800  | H | 5.90719700  | 0.35715800  | -1.17640500 |
| C  | 5.37131300  | -2.45508700 | 2.72092500  | C | 7.98537600  | 0.31465000  | -0.55584400 |
| C  | 6.38091100  | -2.96981200 | 1.91714400  | H | 7.92546000  | 0.99934500  | 0.29710800  |
| H  | 7.55143900  | -2.68679000 | 0.14730100  | H | 8.75965400  | -0.42445600 | -0.31786800 |
| H  | 5.10986200  | -2.97257200 | 3.63782900  | H | 8.32776900  | 0.88692600  | -1.42646400 |
| H  | 6.89007500  | -3.88779800 | 2.19910900  | C | 6.86112700  | -1.33276300 | -2.07245900 |
| C  | -4.13893800 | -2.56151600 | -0.10945200 | H | 5.96594200  | -1.92024000 | -2.28381600 |
| C  | -4.55413800 | -2.65866800 | -1.46416900 | H | 7.09845200  | -0.74098100 | -2.96446900 |
| C  | -3.75079000 | -3.70568700 | 0.62581400  | H | 7.70166500  | -2.01671700 | -1.90416100 |
| C  | -4.49864600 | -3.91618300 | -2.07583600 | C | 2.97673600  | 2.74712900  | -2.79444900 |
| C  | -3.73762800 | -4.93985600 | -0.03743400 | H | 3.56477700  | 1.95601400  | -2.32226300 |
| C  | -4.09374300 | -5.04781600 | -1.37514200 | C | 3.92050700  | 3.91985400  | -3.15008500 |
| H  | -4.79138600 | -4.01546100 | -3.11507600 | H | 4.72721900  | 3.57199700  | -3.80653800 |
| H  | -3.43365400 | -5.82809600 | 0.50663400  | H | 3.37416400  | 4.70959300  | -3.68029800 |
| H  | -4.06563700 | -6.01397900 | -1.87186500 | C | 4.37605500  | 4.37879100  | -2.26536700 |
| C  | -3.83312700 | 2.26051900  | 1.14067900  | H | 2.38979300  | 2.15866700  | -4.09094500 |
| C  | -3.45640500 | 2.80712400  | 2.39198400  | H | 3.19296500  | 1.71465900  | -4.68910800 |

|   |             |             |             |    |             |             |             |
|---|-------------|-------------|-------------|----|-------------|-------------|-------------|
| H | 1.65969300  | 1.37425200  | -3.88016000 | C  | -3.30340900 | 1.97463000  | 3.66228200  |
| H | 1.91029000  | 2.93030900  | -4.70606600 | H  | -3.39845700 | 0.92139000  | 3.39307500  |
| C | -3.40162000 | -3.67928900 | 2.11198800  | C  | -4.40884300 | 2.31142300  | 4.68659600  |
| H | -3.21738600 | -2.64178700 | 2.40129200  | H  | -5.41499100 | 2.19192300  | 4.26798000  |
| C | -4.57334000 | -4.22683500 | 2.95861800  | H  | -4.32622000 | 1.65848400  | 5.56345100  |
| H | -5.51224900 | -3.69105500 | 2.78022000  | H  | -4.32378100 | 3.34751800  | 5.03433800  |
| H | -4.75384000 | -5.28308600 | 2.72672100  | C  | -1.91701700 | 2.15083300  | 4.30860500  |
| H | -4.33807700 | -4.15575800 | 4.02743100  | H  | -1.11683300 | 1.94116100  | 3.59635500  |
| C | -2.12147100 | -4.47411300 | 2.43711900  | H  | -1.77847400 | 3.16963500  | 4.68899400  |
| H | -1.29848800 | -4.21228600 | 1.77023000  | H  | -1.80488900 | 1.46377400  | 5.15502300  |
| H | -1.81077400 | -4.26903600 | 3.46782600  | I  | 3.07878500  | -1.14431400 | -2.42874400 |
| H | -2.28997700 | -5.55454200 | 2.35850100  | C  | 1.28562100  | -2.45103900 | -0.32730600 |
| C | -5.14708900 | -1.48406100 | -2.24422400 | C  | 2.07225200  | -3.31949200 | 0.44816300  |
| H | -4.69495000 | -0.56063900 | -1.87199600 | C  | 0.21121000  | -2.99854600 | -1.03991900 |
| C | -6.67217200 | -1.39080500 | -2.01338800 | C  | 1.76213200  | -4.68098400 | 0.55342900  |
| H | -7.09015700 | -0.53771800 | -2.56116600 | H  | 2.95775100  | -2.94973800 | 0.96139700  |
| H | -7.17137400 | -2.29886200 | -2.37166100 | C  | -0.09253400 | -4.36074500 | -0.95083700 |
| H | -6.93043400 | -1.26812100 | -0.95641100 | H  | -0.37988700 | -2.37011300 | -1.69975900 |
| C | -4.86244600 | -1.53289000 | -3.75553700 | C  | 0.67719100  | -5.20861900 | -0.14867300 |
| H | -5.17144800 | -0.58747200 | -4.21546700 | H  | 2.38912800  | -5.32984500 | 1.16234400  |
| H | -3.79831200 | -1.67456000 | -3.96139200 | H  | -0.93010100 | -4.75871700 | -1.51916500 |
| H | -5.42511100 | -2.33145500 | -4.25319100 | H  | 0.44669900  | -6.26995800 | -0.08878800 |
| C | -4.63801700 | 2.58943700  | -1.30614900 | H  | 5.18643500  | 2.02695900  | 2.23275500  |
| H | -4.48541700 | 1.50795000  | -1.35560500 | H  | 4.17602400  | 3.83376600  | 1.01828000  |
| C | -6.15702200 | 2.85892800  | -1.39185900 | H  | -5.19559300 | -1.52108000 | 2.46315500  |
| H | -6.36113300 | 3.93622000  | -1.37931800 | H  | -5.67364100 | 0.81460300  | 2.56939700  |
| H | -6.56453600 | 2.45075800  | -2.32430900 | Se | -0.18123800 | 0.23420100  | 0.75523900  |
| H | -6.70742600 | 2.41203300  | -0.55672100 | C  | -0.54760900 | -0.77686600 | 2.41234300  |
| C | -3.93132000 | 3.20077100  | -2.53013700 | F  | -1.85901400 | -0.71661200 | 2.76991800  |
| H | -4.16548100 | 4.26614400  | -2.64242500 | F  | 0.15182000  | -0.22308500 | 3.43305200  |
| H | -2.84677400 | 3.08503600  | -2.46756000 | F  | -0.21979100 | -2.07214800 | 2.37214500  |
| H | -4.26795600 | 2.69670200  | -3.44265800 | I  | -1.37736700 | 0.22873600  | -3.07628900 |

Zero-point correction= 1.306515 (Hartree/Particle)  
 Thermal correction to Energy= 1.388450  
 Thermal correction to Enthalpy= 1.389394  
 Thermal correction to Gibbs Free Energy= 1.183978  
 Sum of electronic and zero-point Energies= -5654.235422  
 Sum of electronic and thermal Energies= -5654.153487  
 Sum of electronic and thermal Enthalpies= -5654.152543  
 Sum of electronic and thermal Free Energies= -5654.357959  
 CPCM (Benzene) PBE0-D3/def2TZVP E = -8902.67426249  
 CPCM (Benzene) M06L/def2TZVP E = -8906.46723012

### pre-RE-I/SeCF<sub>3</sub> triplet

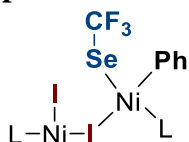

|    |             |             |             |   |             |             |             |
|----|-------------|-------------|-------------|---|-------------|-------------|-------------|
| Ni | 2.16997300  | -0.56048800 | 0.10204200  | C | 4.48076600  | 0.00778800  | 2.90202700  |
| Ni | -2.42099700 | -0.19652800 | -0.50707300 | C | 6.71711100  | -1.49639200 | 2.10421900  |
| C  | 3.33983300  | 1.17416600  | 0.07055500  | C | 5.03523000  | -0.96962800 | 3.74021200  |
| C  | 5.19038900  | 2.52218700  | 0.64563700  | C | 6.13476600  | -1.72341800 | 3.34662700  |
| C  | 4.41177100  | 3.19132500  | -0.48505900 | H | 7.58983700  | -2.07278500 | 1.81362500  |
| C  | -4.05377300 | 0.03053400  | 0.53424200  | H | 4.60533600  | -1.12902400 | 4.72400000  |
| C  | -6.04896000 | 0.98518700  | 1.38886400  | H | 6.54774900  | -2.47581700 | 4.01327300  |
| C  | -6.10970600 | -0.53484500 | 1.57180500  | C | -4.60767200 | -2.39142500 | 0.76206700  |
| N  | 3.19425800  | 2.35101000  | -0.57251700 | C | -5.13019100 | -3.11769300 | -0.33266400 |
| N  | 4.52713200  | 1.19858200  | 0.72949300  | C | -3.89122600 | -3.02781700 | 1.80184300  |
| N  | -4.89316100 | -0.98340900 | 0.86369400  | C | -4.88152500 | -4.49464400 | -0.38412800 |
| N  | -4.66805000 | 1.18694600  | 0.89923700  | C | -3.67261900 | -4.40710900 | 1.69890600  |
| H  | 4.94756600  | 3.15106400  | -1.44062300 | C | -4.15583600 | -5.13513700 | 0.61583100  |
| H  | 6.25277800  | 2.41564100  | 0.42568800  | H | -5.26487300 | -5.07313900 | -1.21923400 |
| H  | -7.00345000 | -0.98299400 | 1.13042700  | H | -3.11964000 | -4.91788800 | 2.48160600  |
| H  | -6.76750400 | 1.34627700  | 0.64264500  | H | -3.97458900 | -6.20531800 | 0.55510300  |
| C  | 2.10167800  | 2.77603700  | -1.42439000 | C | -4.16619200 | 2.52445900  | 0.73188700  |
| C  | 1.14010300  | 3.68834100  | -0.92716400 | C | -3.62233000 | 3.18540200  | 1.85907300  |
| C  | 2.05752500  | 2.32027000  | -2.76660900 | C | -4.31613300 | 3.18403900  | -0.50986600 |
| C  | 0.06713900  | 4.01442900  | -1.77123800 | C | -3.19170900 | 4.50899200  | 1.70556600  |
| C  | 0.96672400  | 2.69367700  | -3.55909300 | C | -3.86989800 | 4.50892800  | -0.60645700 |
| C  | -0.03800500 | 3.51239100  | -3.06056900 | C | -3.30881200 | 5.16674200  | 0.48410400  |
| H  | -0.70856700 | 4.67341700  | -1.39021900 | H | -2.77193800 | 5.03552100  | 2.55826200  |
| H  | 0.90090100  | 2.33060400  | -4.57880800 | H | -3.97797600 | 5.03729700  | -1.54909500 |
| H  | -0.89389500 | 3.76648600  | -3.67916600 | H | -2.97836900 | 6.19802800  | 0.38689600  |
| C  | 5.05571200  | 0.18927500  | 1.61949900  | C | 1.14559100  | 4.48315000  | 0.39139800  |
| C  | 6.20329800  | -0.54166000 | 1.21912600  | H | 0.08403500  | 4.58783600  | 0.64903200  |

|   |             |             |             |    |             |             |             |
|---|-------------|-------------|-------------|----|-------------|-------------|-------------|
| C | 1.67184100  | 5.91457300  | 0.12981600  | C  | -7.48031100 | -2.85333000 | -1.21244600 |
| H | 1.56449300  | 6.53148900  | 1.03050700  | H  | -8.11056700 | -2.33946100 | -1.94827900 |
| H | 2.73435000  | 5.91019200  | -0.14438200 | H  | -7.62623100 | -3.93240000 | -1.34240000 |
| H | 1.12592600  | 6.40027100  | -0.68518800 | H  | -7.84483500 | -2.59347100 | -0.21140200 |
| C | 1.81076800  | 3.90138500  | 1.64494900  | C  | -5.54337900 | -2.82401100 | -2.83963800 |
| H | 2.90330400  | 3.91438300  | 1.59783900  | H  | -6.15543700 | -2.27756200 | -3.56741700 |
| H | 1.52601700  | 4.51511300  | 2.50867700  | H  | -4.49721500 | -2.55108800 | -3.00322900 |
| H | 1.47604300  | 2.88086800  | 1.83456600  | H  | -5.66311000 | -3.89345600 | -3.05143000 |
| C | 3.35849400  | 0.88836900  | 3.44742400  | C  | -5.00426300 | 2.54025900  | -1.71084700 |
| H | 2.87000000  | 1.38264300  | 2.60568400  | H  | -5.09914700 | 1.46843100  | -1.51435400 |
| C | 3.94453800  | 1.98918200  | 4.35945400  | C  | -6.42456600 | 3.11908800  | -1.89283200 |
| H | 4.42813400  | 1.54980300  | 5.24027900  | H  | -6.38567100 | 4.18992800  | -2.12703000 |
| H | 4.69555500  | 2.59520000  | 3.84035700  | H  | -6.93913700 | 2.61396700  | -2.71879900 |
| H | 3.15023800  | 2.65934000  | 4.70865900  | H  | -7.03475100 | 3.00286400  | -0.98942000 |
| C | 2.26852800  | 0.10542900  | 4.20278200  | C  | -4.19579600 | 2.68449800  | -3.01279200 |
| H | 1.85736700  | -0.70873200 | 3.59921000  | H  | -4.10742800 | 3.73342800  | -3.32248900 |
| H | 2.64468400  | -0.31838100 | 5.14149900  | H  | -3.19409400 | 2.26004400  | -2.90689000 |
| H | 1.44292200  | 0.77908100  | 4.54707600  | H  | -4.69806200 | 2.14422100  | -3.82298900 |
| C | 6.94682000  | -0.29164000 | -0.09258400 | C  | -3.55062900 | 2.53530400  | 3.23921000  |
| H | 6.30361400  | 0.31679000  | -0.73684300 | H  | -3.81037700 | 1.47822000  | 3.12493800  |
| C | 8.25487400  | 0.48977100  | 0.17061300  | C  | -4.57517100 | 3.17573200  | 4.20108200  |
| H | 8.08664000  | 1.41558100  | 0.73196300  | H  | -5.59387200 | 3.14330000  | 3.79809600  |
| H | 8.95563500  | -0.11790800 | 0.75514000  | H  | -4.57400700 | 2.65494700  | 5.16619200  |
| H | 8.74510800  | 0.74771100  | -0.77563500 | H  | -4.33236200 | 4.22838000  | 4.38933500  |
| C | 7.27403800  | -1.58200700 | -0.86846600 | C  | -2.14110600 | 2.59076800  | 3.85679500  |
| H | 6.37423300  | -2.16965100 | -1.06208100 | H  | -1.40152000 | 2.11858500  | 3.20390800  |
| H | 7.72885600  | -1.32683100 | -1.83285800 | H  | -1.82200700 | 3.62287800  | 4.04439700  |
| H | 7.99024200  | -2.21164900 | -0.32855400 | H  | -2.13316300 | 2.06528600  | 4.81949100  |
| C | 3.18999300  | 1.53492500  | -3.42413100 | C  | 1.47139700  | -2.33662700 | 0.47550700  |
| H | 3.80751400  | 1.08885900  | -2.63985200 | C  | 2.09086300  | -2.93699700 | 1.57543900  |
| C | 4.08999500  | 2.48822100  | -4.24386000 | C  | 0.40700600  | -2.96170000 | -0.17279000 |
| H | 4.93490000  | 1.93875600  | -4.67652800 | C  | 1.61110700  | -4.16425200 | 2.05309700  |
| H | 3.52567100  | 2.94062500  | -5.06783800 | H  | 2.95072400  | -2.47970900 | 2.05908700  |
| H | 4.49118000  | 3.30713000  | -3.63529700 | C  | -0.05366400 | -4.19358100 | 0.30279000  |
| C | 2.69669800  | 0.38595400  | -4.32286300 | H  | -0.07483300 | -2.50318500 | -1.03092600 |
| H | 3.54579300  | -0.23626600 | -4.62735100 | C  | 0.54481500  | -4.79557800 | 1.41342700  |
| H | 1.97588000  | -0.25137300 | -3.80540700 | H  | 2.09337500  | -4.62930100 | 2.91004200  |
| H | 2.22391600  | 0.76256000  | -5.23703000 | H  | -0.89060700 | -4.67289400 | -0.19796900 |
| C | -3.41090000 | -2.28698500 | 3.04775100  | H  | 0.18601700  | -5.75706400 | 1.77241700  |
| H | -3.53926800 | -1.21414800 | 2.87387800  | H  | 5.08687900  | 3.04695200  | 1.60281600  |
| C | -4.26664900 | -2.67369200 | 4.27380700  | H  | 4.15193900  | 4.23074900  | -0.27879900 |
| H | -5.33458200 | -2.49390000 | 4.10255600  | H  | -6.06296900 | -0.83424700 | 2.62625300  |
| H | -4.14826200 | -3.73689000 | 4.51456000  | H  | -6.21884200 | 1.53546300  | 2.31775300  |
| H | -3.96002500 | -2.09562100 | 5.15408600  | Se | 3.61195700  | -1.48167800 | -1.41617900 |
| C | -1.91797000 | -2.51700200 | 3.34445500  | C  | 3.31910300  | -3.37287000 | -1.91597600 |
| H | -1.29187000 | -2.24075300 | 2.49265400  | F  | 4.29383500  | -3.66479700 | -2.81023400 |
| H | -1.61182100 | -1.90917500 | 4.20480300  | F  | 2.14261100  | -3.59646100 | -2.51516500 |
| H | -1.70860700 | -3.56398300 | 3.59144900  | F  | 3.44231100  | -4.23789400 | -0.89888900 |
| C | -5.99652000 | -2.47182600 | -1.41103100 | I  | -1.89198400 | -0.80329300 | -2.95853500 |
| H | -5.90892300 | -1.38589500 | -1.30344400 | I  | -0.09512600 | 0.51888200  | 0.89084400  |

Zero-point correction= 1.304082 (Hartree/Particle)  
Thermal correction to Energy= 1.387439  
Thermal correction to Enthalpy= 1.388383  
Thermal correction to Gibbs Free Energy= 1.173497  
Sum of electronic and zero-point Energies= -5654.264422  
Sum of electronic and thermal Energies= -5654.181065  
Sum of electronic and thermal Enthalpies= -5654.180121  
Sum of electronic and thermal Free Energies= -5654.395008  
CPCM (Benzene) PBE0-D3/def2TZVP E = -8902.69812381  
CPCM (Benzene) M06L/def2TZVP E = -8906.47790308

# TS-RE-I<sub>2</sub>-PhSeCF<sub>3</sub> triplet

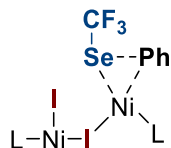

|    |             |             |             |    |             |             |             |
|----|-------------|-------------|-------------|----|-------------|-------------|-------------|
| Ni | 1.96143200  | -0.38022900 | -0.06955000 | H  | 8.50433100  | 0.87345200  | -1.47255400 |
| Ni | -2.34089600 | -0.20703000 | -0.34507500 | C  | 7.07304500  | -1.47078200 | -1.30151300 |
| C  | 3.32092000  | 1.21918800  | 0.11695000  | H  | 6.16260400  | -2.07331700 | -1.33135400 |
| C  | 5.17521200  | 2.58708000  | 0.63123600  | H  | 7.35326400  | -1.22361800 | -2.33221000 |
| C  | 4.28454100  | 3.31470300  | -0.37290200 | H  | 7.88109300  | -2.08053500 | -0.88143600 |
| C  | -4.06812600 | -0.04384000 | 0.53551600  | C  | 2.93801300  | 1.87113000  | -3.34951800 |
| C  | -6.15852300 | 0.82210500  | 1.25177700  | H  | 3.61686600  | 1.37138000  | -2.65230900 |
| C  | -6.11384100 | -0.67892400 | 1.55790800  | C  | 3.74348300  | 2.95257600  | -4.10607700 |
| N  | 3.09854100  | 2.43117700  | -0.43872600 | C  | 4.58294600  | 2.49699200  | -4.64538500 |
| N  | 4.55162100  | 1.24101800  | 0.68534700  | H  | 3.10823600  | 3.46130000  | -4.84064400 |
| N  | -4.83866500 | -1.08830800 | 0.93340500  | H  | 4.14579800  | 3.72117300  | -3.43607700 |
| N  | -4.78272600 | 1.08775000  | 0.77946300  | C  | 2.44307500  | 0.80607900  | -4.34600400 |
| H  | 4.74414400  | 3.38504400  | -1.36501200 | H  | 3.29594200  | 0.24543600  | -4.74530200 |
| H  | 6.21473900  | 2.51860800  | 0.30911600  | H  | 1.75876200  | 0.09847700  | -3.87192300 |
| H  | -6.95313600 | -1.22950400 | 1.12485300  | H  | 1.92625200  | 1.26137200  | -5.19891200 |
| H  | -6.87974400 | 1.06881500  | 0.46257600  | C  | -3.47264200 | -2.31519900 | 3.23789300  |
| C  | 1.92600800  | 2.85979000  | -1.17477300 | H  | -3.59560600 | -1.24713100 | 3.03124300  |
| C  | 0.94960800  | 3.65995700  | -0.53313300 | C  | -4.43131300 | -2.69224000 | 4.38867800  |
| C  | 1.81143100  | 2.52024700  | -2.54835400 | H  | -5.48175400 | -2.53299500 | 4.11876300  |
| C  | -0.20615700 | 3.97397000  | -1.26423100 | H  | -4.32011800 | -3.74925200 | 4.65904400  |
| C  | 0.64091300  | 2.88175000  | -3.22453100 | H  | -4.21434700 | -2.09376800 | 5.28191100  |
| C  | -0.37601800 | 3.57623800  | -2.58258600 | C  | -2.01124900 | -2.52512100 | 3.67423900  |
| H  | -0.99356700 | 4.53948200  | -0.77385000 | H  | -1.31547300 | -2.27499400 | 2.86958500  |
| H  | 0.51993400  | 2.60281700  | -4.26520800 | H  | -1.78117100 | -1.88094200 | 4.53141600  |
| H  | -1.29421600 | 3.81593100  | -3.11084700 | H  | -1.82493600 | -3.56043900 | 3.98387400  |
| C  | 5.21460000  | 0.22807600  | 1.47441000  | C  | -5.69917800 | -2.64072600 | -1.40246300 |
| C  | 6.33553700  | -0.43832700 | 0.91758900  | H  | -5.66858800 | -1.55137000 | -1.29987200 |
| C  | 4.82410500  | 0.01252600  | 2.81838000  | C  | -7.17572000 | -3.08511400 | -1.31444500 |
| C  | 7.02575100  | -1.35193100 | 1.72388200  | H  | -7.76766800 | -2.60689800 | -2.10419700 |
| C  | 5.55595300  | -0.91148300 | 3.57618200  | H  | -7.26487700 | -4.17086500 | -1.44066800 |
| C  | 6.64226600  | -1.59270300 | 3.03913400  | H  | -7.62800200 | -2.83028100 | -0.34862800 |
| H  | 7.88140800  | -1.87954500 | 1.31388900  | C  | -5.12244500 | -2.98228100 | -2.78862200 |
| H  | 5.26906800  | -1.09376600 | 4.60719400  | H  | -5.69529000 | -2.46295900 | -3.56654800 |
| H  | 7.19461200  | -2.30500300 | 3.64643200  | H  | -4.07682400 | -2.67325200 | -2.87193000 |
| C  | -4.48652500 | -2.48341200 | 0.87120400  | H  | -5.18575400 | -4.05631500 | -3.00127800 |
| C  | -4.89010000 | -3.23935600 | -0.25455500 | C  | -5.25637300 | 2.04543800  | -1.97700700 |
| C  | -3.82714900 | -3.08401800 | 1.96785800  | H  | -5.29791200 | 1.01362700  | -1.61592800 |
| C  | -4.57672500 | -4.60378100 | -0.27634300 | C  | -6.70190100 | 2.50504300  | -2.26765100 |
| C  | -3.54228500 | -4.45360700 | 1.89430300  | H  | -6.71679400 | 3.52282400  | -2.67598900 |
| C  | -3.90468100 | -5.20739300 | 0.78205200  | H  | -7.17187700 | 1.84282300  | -3.00442700 |
| H  | -4.86644700 | -5.20205100 | -1.13485100 | H  | -7.32283000 | 2.50532300  | -1.36390800 |
| H  | -3.03504300 | -4.93680300 | 2.72426700  | C  | -4.42540100 | 2.03312300  | -3.27305800 |
| H  | -3.67264700 | -6.26878300 | 0.74424100  | H  | -4.35898600 | 3.03238500  | -3.72102200 |
| C  | -4.41250900 | 2.43424900  | 0.43406700  | H  | -3.41411100 | 1.65772600  | -3.09429400 |
| C  | -3.93449100 | 3.28879100  | 1.45469500  | H  | -4.89701300 | 1.37397400  | -4.01119900 |
| C  | -4.63287500 | 2.90600800  | -0.88086300 | C  | -3.77712100 | 2.82753400  | 2.90095500  |
| C  | -3.64875300 | 4.61918700  | 1.12350900  | H  | -3.90728800 | 1.74090200  | 2.91938700  |
| C  | -4.32478200 | 4.24444300  | -1.15864100 | C  | -4.86451300 | 3.45395500  | 3.80046600  |
| C  | -3.83640500 | 5.09518800  | -0.17139600 | H  | -5.87484100 | 3.24362000  | 3.43085700  |
| H  | -3.28543800 | 5.29394200  | 1.89369600  | H  | -4.78875200 | 3.06474500  | 4.82295300  |
| H  | -4.48701800 | 4.62874200  | -2.16152200 | H  | -4.75475900 | 4.54405200  | 3.84865400  |
| H  | -3.61573700 | 6.13336600  | -0.40758000 | C  | -2.37777500 | 3.12546200  | 3.46993900  |
| C  | 1.02069300  | 4.35659100  | 0.83700500  | H  | -1.59697800 | 2.67382300  | 2.85121300  |
| H  | -0.02090500 | 4.39155100  | 1.17963800  | H  | -2.18791600 | 4.20367500  | 3.53626600  |
| C  | 1.46284100  | 5.82675100  | 0.64341700  | H  | -2.28876600 | 2.71517900  | 4.48327300  |
| H  | 1.39879900  | 6.37218300  | 1.59293900  | C  | 2.08479400  | -2.29501500 | 0.46823900  |
| H  | 2.50014800  | 5.89316300  | 0.29190400  | C  | 3.06127400  | -2.76540900 | 1.34588600  |
| H  | 0.83475600  | 6.34129300  | -0.09077900 | C  | 0.91227900  | -3.02104400 | 0.23129200  |
| C  | 1.80597500  | 3.71777400  | 1.98859400  | C  | 2.81440900  | -3.93471400 | 2.07532400  |
| H  | 2.88941000  | 3.77406300  | 1.85220300  | H  | 4.00018000  | -2.24046500 | 1.46584900  |
| H  | 1.57491200  | 4.26036600  | 2.91374900  | C  | 0.68396600  | -4.19005400 | 0.96177400  |
| H  | 1.51989300  | 2.67507400  | 2.13180900  | H  | 0.16950400  | -2.67895900 | -0.48329400 |
| C  | 3.68193200  | 0.76747500  | 3.49043400  | C  | 1.62900600  | -4.64574600 | 1.88567400  |
| H  | 3.09793100  | 1.26272700  | 2.71328800  | H  | 3.56691500  | -4.29407700 | 2.77300200  |
| C  | 4.23115200  | 1.85775300  | 4.43524600  | H  | -0.24281800 | -4.73560200 | 0.80416500  |
| H  | 4.80754900  | 1.41312000  | 5.25567200  | H  | 1.44826600  | -5.56159600 | 2.44247800  |
| H  | 4.89108600  | 2.55966000  | 3.91242300  | H  | 5.15309200  | 3.04044800  | 1.62920700  |
| H  | 3.40669900  | 2.43098900  | 4.87501600  | H  | 4.00195000  | 4.31923200  | -0.05300900 |
| C  | 2.71643200  | -0.16173000 | 4.25049200  | H  | -6.08983900 | -0.88552600 | 2.63466800  |
| H  | 2.34842700  | -0.96736600 | 3.60949700  | H  | -6.39432400 | 1.43051500  | 2.12898100  |
| H  | 3.19053400  | -0.61116900 | 5.13134100  | I  | -0.18554700 | 0.33592500  | 1.35623500  |
| H  | 1.84986500  | 0.41055700  | 4.59902800  | Se | 3.34551100  | -1.37811200 | -1.65141400 |
| C  | 6.85738900  | -0.17552500 | -0.49454900 | C  | 2.76613500  | -3.06268300 | -2.51426800 |
| H  | 6.10658400  | 0.41644100  | -1.02856300 | F  | 1.46008200  | -3.12285100 | -2.78826500 |
| C  | 8.17516800  | 0.63056200  | -0.45537500 | F  | 3.09240000  | -4.16101500 | -1.81271900 |
| H  | 8.08017400  | 1.56794300  | 0.10411100  | F  | 3.44110200  | -3.11703400 | -3.68422100 |
| H  | 8.97157000  | 0.04848800  | 0.02299600  | I  | -1.48083300 | -0.93791400 | -2.66922000 |

Zero-point correction= 1.304027 (Hartree/Particle)  
 Thermal correction to Energy= 1.386703  
 Thermal correction to Enthalpy= 1.387647  
 Thermal correction to Gibbs Free Energy= 1.175257  
 Sum of electronic and zero-point Energies= -5654.262947  
 Sum of electronic and thermal Energies= -5654.180271  
 Sum of electronic and thermal Enthalpies= -5654.179327  
 Sum of electronic and thermal Free Energies= -5654.391718  
 CPCM (Benzene) PBE0-D3/def2TZVP E = -8902.69708564  
 CPCM (Benzene) M06L/def2TZVP E = -8906.46755982

### TS-RE-I<sub>2</sub>-PhSeCF<sub>3</sub> singlet

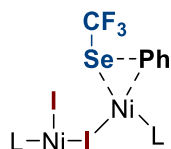

|    |             |             |             |   |             |             |             |
|----|-------------|-------------|-------------|---|-------------|-------------|-------------|
| Ni | 2.32206600  | -0.49100800 | -0.12233400 | C | 4.29917700  | 1.19308400  | 4.69773400  |
| Ni | -2.11194800 | -0.10613000 | -0.31684600 | H | 4.79944100  | 0.57608500  | 5.45420300  |
| C  | 3.37466400  | 1.10158900  | 0.23561600  | H | 5.04601600  | 1.88523800  | 4.29205100  |
| C  | 5.18684100  | 2.40322400  | 1.05647000  | H | 3.52686700  | 1.78470000  | 5.20380500  |
| C  | 4.37930500  | 3.24228500  | 0.06992800  | C | 2.59814100  | -0.61242400 | 4.20231600  |
| C  | -3.80430700 | -0.05403600 | 0.47351900  | H | 2.14912800  | -1.25229700 | 3.43826000  |
| C  | -5.88278600 | 0.74830800  | 1.24363000  | H | 3.01067100  | -1.25159500 | 4.99237200  |
| C  | -5.94391400 | -0.77602600 | 1.13775500  | H | 1.79864000  | -0.01218000 | 4.65171300  |
| N  | 3.19458100  | 2.39064400  | -0.16670500 | C | 6.86038600  | -0.24930200 | -0.42082600 |
| N  | 4.58025200  | 1.06672500  | 0.88218500  | H | 6.15185200  | 0.45422900  | -0.87053600 |
| N  | -4.53851100 | -1.13309800 | 0.83860000  | C | 8.19844700  | 0.49051900  | -0.19587100 |
| N  | -4.56481500 | 1.05630200  | 0.64487300  | H | 8.10159000  | 1.32234700  | 0.51050700  |
| H  | 4.91861400  | 3.40254900  | -0.87117400 | H | 8.95492000  | -0.19265300 | 0.20848200  |
| H  | 6.25425700  | 2.38587800  | 0.82736500  | H | 8.58033200  | 0.89045200  | -1.14288900 |
| H  | -6.59216800 | -1.10495400 | 0.31955300  | C | 7.07163600  | -1.39568900 | -1.42794900 |
| H  | -6.68071100 | 1.24668000  | 0.68925300  | H | 6.14817800  | -1.95290300 | -1.60359200 |
| C  | 2.10672700  | 2.90828000  | -0.95990100 | H | 7.41163700  | -0.98847600 | -2.38761300 |
| C  | 1.09842000  | 3.68756500  | -0.34566000 | H | 7.83715800  | -2.10178600 | -1.08556400 |
| C  | 2.10651500  | 2.68598000  | -2.36193200 | C | 3.26431700  | 2.01296300  | -3.09637700 |
| C  | 0.03830900  | 4.13068200  | -1.15366300 | C | 3.82338100  | 1.40951800  | -2.37581200 |
| C  | 1.03358200  | 3.17344800  | -3.11537800 | C | 4.22039500  | 3.07316300  | -3.68883800 |
| C  | -0.00819400 | 3.87219100  | -2.51608700 | H | 5.07465900  | 2.58833600  | -4.17744100 |
| H  | -0.77009300 | 4.68956400  | -0.68946900 | H | 3.70275600  | 3.67926200  | -4.44216300 |
| H  | 1.01076600  | 2.99751900  | -4.18574400 | H | 4.60809800  | 3.76016400  | -2.92887300 |
| H  | -0.84886600 | 4.21960000  | -3.11060200 | C | 2.79919700  | 1.06785900  | -4.21955700 |
| C  | 5.18340300  | -0.06285900 | 1.53992200  | H | 3.63646300  | 0.45068600  | -4.56282000 |
| C  | 6.27381300  | -0.71399000 | 0.91105000  | H | 2.00185800  | 0.40210500  | -3.88479400 |
| C  | 4.75070800  | -0.44353900 | 2.83285300  | H | 2.43084100  | 1.62559300  | -5.08910600 |
| C  | 6.87521700  | -1.78998500 | 1.57663600  | C | -3.17144000 | -1.89254400 | 3.33244400  |
| C  | 5.39040700  | -1.52501700 | 3.45234900  | H | -3.12427500 | -0.88864400 | 2.90242100  |
| C  | 6.43493100  | -2.20172900 | 2.83063300  | C | -4.30519700 | -1.90916700 | 4.38156500  |
| H  | 7.70607300  | -2.30909200 | 1.10803500  | H | -5.28126000 | -1.67162000 | 3.94443700  |
| H  | 5.06920900  | -1.83591900 | 4.44217200  | H | -4.38687900 | -2.89803600 | 4.84856400  |
| H  | 6.91517200  | -3.04027900 | 3.32844500  | H | -4.10481600 | -1.17840200 | 5.17461000  |
| C  | -4.11003600 | -2.50447500 | 0.99709900  | C | -1.81949600 | -2.14471500 | 4.02462700  |
| C  | -4.46352300 | -3.46470300 | 0.02022600  | H | -1.00407100 | -2.20598200 | 3.29941000  |
| C  | -3.46630300 | -2.87921800 | 2.20351700  | H | -1.59939400 | -1.32043800 | 4.71289400  |
| C  | -4.12549300 | -4.80321900 | 0.26180900  | H | -1.82983100 | -3.06595200 | 4.61957800  |
| C  | -3.15387800 | -4.23152200 | 2.38763400  | C | -5.24443900 | -3.12327200 | -1.24627900 |
| C  | -3.47568800 | -5.18742300 | 1.42905400  | H | -5.20638100 | -2.03816300 | -1.38525400 |
| H  | -4.38397700 | -5.55563000 | -0.47659600 | C | -6.72244600 | -3.55525000 | -1.11035300 |
| H  | -2.65866800 | -4.54189600 | 3.30188000  | H | -7.29290900 | -3.24592200 | -1.99430400 |
| H  | -3.22701600 | -6.23234500 | 1.59609900  | H | -6.80143600 | -4.64596100 | -1.02718300 |
| C  | -4.17416300 | 2.44179900  | 0.51386700  | H | -7.20697100 | -3.12739400 | -0.22554500 |
| C  | -3.66077400 | 3.12032200  | 1.64606300  | C | -4.63926900 | -3.75941500 | -2.51223100 |
| C  | -4.43989400 | 3.12326200  | -0.69761100 | H | -5.16042700 | -3.38204500 | -3.39933100 |
| C  | -3.36759200 | 4.48415800  | 1.51923400  | H | -3.58127900 | -3.50931600 | -2.61805700 |
| C  | -4.12513400 | 4.48687600  | -0.76540100 | H | -4.74575500 | -4.85077300 | -2.50935500 |
| C  | -3.58927100 | 5.16329800  | 0.32552000  | C | -5.11680500 | 2.45717000  | -1.89215000 |
| H  | -2.97368200 | 5.02445900  | 2.37504200  | H | -5.02001800 | 1.37441300  | -1.77584800 |
| H  | -4.31578800 | 5.02955100  | -1.68583400 | C | -6.62069000 | 2.80974700  | -1.92905800 |
| H  | -3.36058600 | 6.22350400  | 0.25092000  | H | -6.76580400 | 3.88707900  | -2.07564800 |
| C  | 1.03551800  | 4.21843800  | 1.09784100  | H | -7.11367400 | 2.28834000  | -2.75812500 |
| H  | -0.03294600 | 4.19525000  | 1.34937700  | H | -7.13738400 | 2.53422000  | -1.00244100 |
| C  | 1.45716200  | 5.70715100  | 1.11861000  | C | -4.46281500 | 2.82508900  | -3.23621700 |
| H  | 1.30583000  | 6.13385000  | 2.11798600  | H | -4.63029400 | 3.87702200  | -3.49852700 |
| H  | 2.51819200  | 5.82463100  | 0.86445500  | H | -3.38758900 | 2.63115700  | -3.21943800 |
| H  | 0.88051900  | 6.30058700  | 0.40183100  | H | -4.89600600 | 2.21432900  | -4.03582800 |
| C  | 1.74391900  | 3.46715200  | 2.23337600  | C | -3.49079400 | 2.46270100  | 3.01430400  |
| H  | 2.82866500  | 3.60537800  | 2.22127400  | H | -3.61286700 | 1.38206500  | 2.89215700  |
| H  | 1.38607300  | 3.86636000  | 3.19099700  | C | -4.57539500 | 2.96094500  | 3.99620800  |
| H  | 1.52489700  | 2.39942200  | 2.21194000  | H | -5.58934400 | 2.81350300  | 3.60796100  |
| C  | 3.66853700  | 0.31353400  | 3.59638800  | H | -4.49648200 | 2.43269400  | 4.95394300  |
| H  | 3.15791900  | 0.97163300  | 2.89065800  | H | -4.45644100 | 4.03261800  | 4.19506500  |



|   |             |             |             |    |             |             |             |
|---|-------------|-------------|-------------|----|-------------|-------------|-------------|
| C | -2.09593400 | 2.69178200  | 3.62598800  | H  | -0.82839600 | -4.25386700 | 0.15488900  |
| H | -1.30419500 | 2.35131300  | 2.95428900  | H  | 0.38647200  | -4.99831300 | 2.19558200  |
| H | -1.92481100 | 3.74985100  | 3.85710500  | H  | 5.06472600  | 2.73805400  | 2.09469200  |
| H | -2.00646700 | 2.13535400  | 4.56677400  | H  | 4.08969500  | 4.21795700  | 0.46610400  |
| C | 2.05355900  | -2.48654500 | -0.27358600 | H  | -6.27717100 | -1.26159000 | 2.05736800  |
| C | 2.75710700  | -2.94646300 | 0.86353000  | H  | -5.91296200 | 1.09796600  | 2.28121600  |
| C | 0.76768100  | -3.00729000 | -0.54294100 | I  | -0.09721300 | 0.12847100  | 1.17655700  |
| C | 2.14172300  | -3.82039400 | 1.76273200  | Se | 3.30759200  | -1.72932400 | -1.79998300 |
| H | 3.78327400  | -2.63768000 | 1.03007000  | C  | 2.19326200  | -2.45557300 | -3.29707600 |
| C | 0.17798200  | -3.89393200 | 0.35005300  | F  | 1.00967400  | -1.82916200 | -3.44382100 |
| H | 0.21178400  | -2.67626700 | -1.41106300 | F  | 1.94460900  | -3.77186900 | -3.19371500 |
| C | 0.85619700  | -4.30026600 | 1.50779800  | F  | 2.90231300  | -2.26424700 | -4.42820200 |
| H | 2.68514100  | -4.14708300 | 2.64598000  | I  | -2.53980700 | -0.50761600 | -2.76677400 |

Zero-point correction= 1.305141 (Hartree/Particle)  
 Thermal correction to Energy= 1.387068  
 Thermal correction to Enthalpy= 1.388012  
 Thermal correction to Gibbs Free Energy= 1.179559  
 Sum of electronic and zero-point Energies= -5654.217737  
 Sum of electronic and thermal Energies= -5654.135811  
 Sum of electronic and thermal Enthalpies= -5654.134866  
 Sum of electronic and thermal Free Energies= -5654.343320  
 CPCM (Benzene) PBE0-D3/def2TZVP E = -8902.65501574  
 CPCM (Benzene) M06L/def2TZVP E = -8906.45621876

### TS-OA-I/SeCF<sub>3</sub>-PhBr triplet

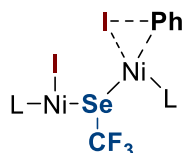

|    |                |                |                |   |                |                |                |
|----|----------------|----------------|----------------|---|----------------|----------------|----------------|
| Ni | 2.03722000000  | -0.44775200000 | 0.27902500000  | F | -1.57369900000 | 1.92854500000  | 2.17874100000  |
| Ni | -2.40646500000 | -0.53225700000 | -0.09457000000 | F | 0.55830100000  | 2.31179500000  | 2.25026200000  |
| C  | 3.97205400000  | 0.25452800000  | 0.03722600000  | I | -2.44168900000 | -3.12930100000 | -0.08957700000 |
| C  | 5.94739500000  | 1.46813400000  | 0.51055900000  | C | 6.31014300000  | -2.79868700000 | -0.65939500000 |
| C  | 6.17387700000  | 0.62563200000  | -0.74136200000 | C | 7.83084500000  | -2.82465600000 | -0.92186000000 |
| C  | -3.93968400000 | 0.64869500000  | -0.35844700000 | C | 5.83143000000  | -4.18540200000 | -0.18302000000 |
| C  | -5.39049600000 | 2.28348700000  | -1.27243900000 | C | 3.41034800000  | 0.65185300000  | -3.21289500000 |
| C  | -6.11369100000 | 1.55954000000  | -0.13905800000 | C | 1.95001900000  | 0.47575100000  | -3.67333800000 |
| N  | 4.94072000000  | -0.19952100000 | -0.79755100000 | C | 4.16465700000  | 1.61480700000  | -4.15361300000 |
| N  | 4.50286000000  | 1.26191000000  | 0.76884100000  | C | -4.56377500000 | 0.53492900000  | 3.05432800000  |
| N  | -5.18069800000 | 0.45332800000  | 0.15778600000  | C | -3.42950900000 | -0.00833500000 | 3.94236800000  |
| N  | -4.00788400000 | 1.78016800000  | -1.11833800000 | C | -5.48632300000 | 1.47199000000  | 3.86171900000  |
| C  | 4.83104500000  | -1.09612400000 | -1.92675500000 | C | -6.74859100000 | -1.69126900000 | -1.05646600000 |
| C  | 4.14357300000  | -0.68123300000 | -3.09118600000 | C | -8.25458500000 | -1.45789300000 | -1.30024400000 |
| C  | 5.53593700000  | -2.32068600000 | -1.88520800000 | C | -6.29214700000 | -3.00770100000 | -1.71400700000 |
| C  | 4.15884000000  | -1.53590800000 | -4.20038300000 | C | -2.78385000000 | 4.34985900000  | -0.47214800000 |
| C  | 5.52170700000  | -3.13127100000 | -3.02588300000 | C | -3.60643900000 | 5.59863900000  | -0.85797500000 |
| C  | 4.83759500000  | -2.74906700000 | -4.17440200000 | C | -1.56052000000 | 4.77279900000  | 0.36279400000  |
| C  | 3.84081200000  | 2.22258800000  | 1.62247900000  | C | -3.34635200000 | 0.27293500000  | -3.59817100000 |
| C  | 3.78540500000  | 2.01323800000  | 3.01730200000  | C | -2.33078700000 | -0.84871700000 | -3.88566300000 |
| C  | 3.41271800000  | 3.44006400000  | 1.03996200000  | C | -4.27145500000 | 0.49780600000  | -4.81315700000 |
| C  | 3.28101800000  | 3.04746600000  | 3.81655300000  | H | 6.52807500000  | 1.11432700000  | 1.37079400000  |
| C  | 2.91044800000  | 4.43447900000  | 1.88586500000  | H | 6.16203800000  | 2.52935900000  | 0.36537000000  |
| C  | 2.84894900000  | 4.24669700000  | 3.26251800000  | H | 7.06031100000  | -0.00801600000 | -0.67940300000 |
| C  | -5.62734400000 | -0.62028400000 | 1.00851500000  | H | 6.24681500000  | 1.22861300000  | -1.65490200000 |
| C  | -5.36277500000 | -0.58394500000 | 2.39461200000  | H | -5.77837300000 | 2.00569900000  | -2.26238700000 |
| C  | -6.41434400000 | -1.64413100000 | 0.43222700000  | H | -5.42971400000 | 3.37069900000  | -1.18234900000 |
| C  | -5.88860600000 | -1.60959100000 | 3.19048700000  | H | -7.09613000000 | 1.17849700000  | -0.42630400000 |
| C  | -6.91713400000 | -2.64181300000 | 1.27409300000  | H | -6.23656200000 | 2.19182100000  | 0.75092900000  |
| C  | -6.65739000000 | -2.62986500000 | 2.64091700000  | H | 3.63023400000  | -1.24150000000 | -5.10211400000 |
| C  | -2.99266800000 | 2.28350800000  | -2.00283800000 | H | 6.05073500000  | -4.07978200000 | -3.01197200000 |
| C  | -2.66975600000 | 1.57883100000  | -3.18594900000 | H | 4.83454800000  | -3.39487200000 | -5.04834400000 |
| C  | -2.40656500000 | 3.53785500000  | -1.70904100000 | H | 3.22729500000  | 2.90848700000  | 4.89184300000  |
| C  | -1.71985900000 | 2.14486900000  | -4.04755600000 | H | 2.56639000000  | 5.37188300000  | 1.45830900000  |
| C  | -1.47581400000 | 4.06273800000  | -2.61251100000 | H | 2.46058200000  | 5.03394900000  | 3.90313700000  |
| C  | -1.12723500000 | 3.37234400000  | -3.76976800000 | H | -5.69391000000 | -1.60608300000 | 4.25910000000  |
| C  | 2.09835000000  | -2.14829300000 | 1.39682800000  | H | -7.51451300000 | -3.44446600000 | 0.85077300000  |
| C  | 3.34707300000  | -2.51036700000 | 1.91859900000  | H | -7.05349800000 | -3.41690600000 | 3.27746500000  |
| C  | 0.90853400000  | -2.46940400000 | 2.06114800000  | H | -1.45435700000 | 1.61976500000  | -4.96060900000 |
| C  | 3.40431100000  | -3.10779700000 | 3.17961000000  | H | -1.01802400000 | 5.02620500000  | -2.40679500000 |
| C  | 0.98833700000  | -3.05536400000 | 3.32684700000  | H | -0.40349800000 | 3.79696200000  | -4.46127200000 |
| C  | 2.22778400000  | -3.38075900000 | 3.88416200000  | H | 4.25199300000  | -2.32533400000 | 1.35437600000  |
| Se | -0.18253100000 | 0.65339000000  | 0.16503500000  | H | -0.05578300000 | -2.29209700000 | 1.59681200000  |
| C  | -0.36071400000 | 1.35444200000  | 1.98286800000  | H | 4.37081600000  | -3.37324200000 | 3.60128100000  |
| F  | -0.21987000000 | 0.41139400000  | 2.94612000000  | H | 0.06825800000  | -3.28785900000 | 3.85583100000  |

|   |                 |                 |                 |    |                 |                 |                 |
|---|-----------------|-----------------|-----------------|----|-----------------|-----------------|-----------------|
| H | 2.277032000000  | -3.866091000000 | 4.855144000000  | H  | -4.495536000000 | 5.345439000000  | -1.446576000000 |
| H | 6.124609000000  | -2.088702000000 | 0.154568000000  | H  | -0.950119000000 | 3.914836000000  | 0.649439000000  |
| H | 8.080455000000  | -3.545824000000 | -1.708658000000 | H  | -0.924130000000 | 5.477042000000  | -0.186294000000 |
| H | 8.372282000000  | -3.120254000000 | -0.015280000000 | H  | -1.890671000000 | 5.276801000000  | 1.279246000000  |
| H | 8.211841000000  | -1.848144000000 | -1.242700000000 | H  | -3.969003000000 | -0.073216000000 | -2.769213000000 |
| H | 4.748719000000  | -4.206436000000 | -0.031096000000 | H  | -1.692739000000 | -0.608320000000 | -4.744987000000 |
| H | 6.082009000000  | -4.964819000000 | -0.911306000000 | H  | -2.856558000000 | -1.783110000000 | -4.110960000000 |
| H | 6.320644000000  | -4.451212000000 | 0.761876000000  | H  | -1.691148000000 | -1.035381000000 | -3.017832000000 |
| H | 3.374272000000  | 1.117583000000  | -2.225033000000 | H  | -5.026482000000 | 1.267194000000  | -4.611407000000 |
| H | 1.893469000000  | 0.120247000000  | -4.708867000000 | H  | -3.702434000000 | 0.817464000000  | -5.694569000000 |
| H | 1.417538000000  | 1.431537000000  | -3.621123000000 | H  | -4.792955000000 | -0.431667000000 | -5.070758000000 |
| H | 1.419739000000  | -0.242864000000 | -3.041884000000 | Br | 1.868020000000  | -2.523269000000 | -0.896391000000 |
| H | 5.192326000000  | 1.795460000000  | -3.816017000000 | C  | 3.493824000000  | 3.722558000000  | -0.457507000000 |
| H | 4.219442000000  | 1.209675000000  | -5.170963000000 | H  | 3.927251000000  | 2.846317000000  | -0.947609000000 |
| H | 3.649143000000  | 2.581317000000  | -4.205677000000 | C  | 4.416956000000  | 4.920158000000  | -0.762644000000 |
| H | -4.093101000000 | 1.126922000000  | 2.265507000000  | C  | 2.097382000000  | 3.937974000000  | -1.071466000000 |
| H | -3.820248000000 | -0.543148000000 | 4.816235000000  | H  | 1.433521000000  | 3.091533000000  | -0.870815000000 |
| H | -2.807921000000 | 0.816429000000  | 4.305610000000  | H  | 1.621703000000  | 4.838524000000  | -0.666124000000 |
| H | -2.788611000000 | -0.694337000000 | 3.380951000000  | H  | 2.176983000000  | 4.065738000000  | -2.158019000000 |
| H | -6.274434000000 | 1.904777000000  | 3.233958000000  | H  | 4.021321000000  | 5.849249000000  | -0.336702000000 |
| H | -5.977856000000 | 0.933608000000  | 4.681252000000  | H  | 4.507297000000  | 5.064500000000  | -1.845798000000 |
| H | -4.909359000000 | 2.295835000000  | 4.299412000000  | H  | 5.424402000000  | 4.774941000000  | -0.354381000000 |
| H | -6.199659000000 | -0.882015000000 | -1.548736000000 | C  | 4.270527000000  | 0.731525000000  | 3.684603000000  |
| H | -8.854441000000 | -2.262800000000 | -0.859108000000 | H  | 4.438433000000  | -0.015307000000 | 2.902411000000  |
| H | -8.470494000000 | -1.433820000000 | -2.375404000000 | C  | 3.215715000000  | 0.154852000000  | 4.647837000000  |
| H | -8.602392000000 | -0.514541000000 | -0.862002000000 | C  | 5.608342000000  | 0.956517000000  | 4.420118000000  |
| H | -5.225542000000 | -1.180772000000 | -1.544755000000 | H  | 6.386360000000  | 1.338275000000  | -1.749699000000 |
| H | -6.842225000000 | -3.868016000000 | -1.314366000000 | H  | 5.492755000000  | 1.681727000000  | 5.234382000000  |
| H | -6.477226000000 | -2.971761000000 | -2.795038000000 | H  | 5.967930000000  | 0.017389000000  | 4.857370000000  |
| H | -3.403918000000 | 3.712706000000  | 0.166121000000  | H  | 3.062760000000  | 0.807560000000  | 5.515118000000  |
| H | -3.005122000000 | 6.290740000000  | -1.459987000000 | H  | 3.541526000000  | -0.820469000000 | 5.022314000000  |
| H | -3.934756000000 | 6.136201000000  | 0.039862000000  | H  | 2.250465000000  | 0.021797000000  | 4.150393000000  |

Zero-point correction= 1.302602 (Hartree/Particle)  
Thermal correction to Energy= 1.385615  
Thermal correction to Enthalpy= 1.386559  
Thermal correction to Gibbs Free Energy= 1.173575  
Sum of electronic and zero-point Energies= -8214.262655  
Sum of electronic and thermal Energies= -8214.179642  
Sum of electronic and thermal Enthalpies= -8214.178698  
Sum of electronic and thermal Free Energies= -8214.391682  
CPCM (Benzene) PBE0-D3/def2TZVP E = -11178.8316095  
CPCM (Benzene) M06L/def2TZVP E = -11182.6515095

### TS-OA-I/SeCF<sub>3</sub>-PhCl triplet

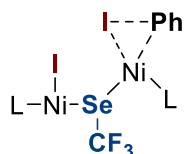

|    |                 |                 |                 |    |                 |                 |                 |
|----|-----------------|-----------------|-----------------|----|-----------------|-----------------|-----------------|
| Ni | 2.082146000000  | -0.552557000000 | 0.211053000000  | C  | -5.735077000000 | -1.989929000000 | 3.052796000000  |
| Ni | -2.363618000000 | -0.571665000000 | -0.170627000000 | C  | -6.781242000000 | -2.830711000000 | 1.054247000000  |
| C  | 4.014444000000  | 0.147594000000  | -0.028441000000 | C  | -6.494319000000 | -2.961366000000 | 2.409246000000  |
| C  | 6.007776000000  | 1.331946000000  | 0.441697000000  | C  | -2.974948000000 | 2.455311000000  | -1.749699000000 |
| C  | 6.199383000000  | 0.532366000000  | -0.844835000000 | C  | -2.723250000000 | 1.897694000000  | -3.024705000000 |
| C  | -3.883710000000 | 0.650549000000  | -0.270656000000 | C  | -2.349447000000 | 3.654878000000  | -1.333747000000 |
| C  | -5.349504000000 | 2.381441000000  | -0.953788000000 | C  | -1.795383000000 | 2.543938000000  | -3.853128000000 |
| C  | -6.053541000000 | 1.525591000000  | 0.097040000000  | C  | -1.446786000000 | 4.268510000000  | -2.209351000000 |
| N  | 4.956943000000  | -0.278643000000 | -0.905710000000 | C  | -1.161759000000 | 3.716493000000  | -3.455180000000 |
| N  | 4.570073000000  | 1.119879000000  | 0.730685000000  | C  | 2.159536000000  | -2.311815000000 | 1.227752000000  |
| N  | -5.113040000000 | 0.396796000000  | 0.248026000000  | C  | 3.407642000000  | -2.684000000000 | 1.739379000000  |
| N  | -3.965037000000 | 1.863534000000  | -0.890730000000 | C  | 0.964508000000  | -2.704615000000 | 1.837993000000  |
| C  | 4.810726000000  | -1.133209000000 | -2.063790000000 | C  | 3.454542000000  | -3.367765000000 | 2.956752000000  |
| C  | 4.084938000000  | -0.677337000000 | -3.188797000000 | C  | 1.035683000000  | -3.376595000000 | 3.060797000000  |
| C  | 5.515159000000  | -2.358252000000 | -2.089331000000 | C  | 2.272355000000  | -3.711465000000 | 3.619287000000  |
| C  | 4.063889000000  | -1.491444000000 | -4.328029000000 | Se | -0.125839000000 | 0.565792000000  | 0.188934000000  |
| C  | 5.463950000000  | -3.126878000000 | -3.257658000000 | C  | -0.277505000000 | 1.130367000000  | 2.056124000000  |
| C  | 4.743238000000  | -2.703731000000 | -4.368760000000 | F  | -0.128352000000 | 0.119211000000  | 2.945291000000  |
| C  | 3.931955000000  | 2.043166000000  | 1.641336000000  | F  | -1.484472000000 | 1.692910000000  | 2.310645000000  |
| C  | 3.893940000000  | 1.765530000000  | 3.024535000000  | F  | 0.651734000000  | 2.060019000000  | 2.381709000000  |
| C  | 3.502028000000  | 3.289246000000  | 1.124598000000  | I  | -2.348151000000 | -3.150440000000 | -0.442230000000 |
| C  | 3.405090000000  | 2.761557000000  | 3.879994000000  | C  | 6.327703000000  | -2.880942000000 | -0.907058000000 |
| C  | 3.014390000000  | 4.242917000000  | 2.024304000000  | C  | 7.838852000000  | -2.901092000000 | -1.220767000000 |
| C  | 2.970264000000  | 3.987798000000  | 3.390911000000  | C  | 5.860757000000  | -4.282320000000 | -0.463175000000 |
| C  | -5.532712000000 | -0.767526000000 | 0.985469000000  | C  | 3.349178000000  | 0.659183000000  | -3.238962000000 |
| C  | -5.243932000000 | -0.874223000000 | 2.363308000000  | C  | 1.875778000000  | 0.501214000000  | -3.663539000000 |
| C  | -6.313225000000 | -1.738229000000 | 0.316270000000  | C  | 4.078022000000  | 1.656686000000  | -4.163696000000 |

|   |                 |                 |                 |    |                 |                 |                 |
|---|-----------------|-----------------|-----------------|----|-----------------|-----------------|-----------------|
| C | -4.461829000000 | 0.188866000000  | 3.127979000000  | H  | 3.564619000000  | 2.625737000000  | -4.162521000000 |
| C | -3.301362000000 | -0.412270000000 | 3.941756000000  | H  | -4.017067000000 | 0.873769000000  | 2.401466000000  |
| C | -5.396425000000 | 1.010183000000  | 4.041203000000  | H  | -3.664872000000 | -1.051513000000 | 4.755069000000  |
| C | -6.682972000000 | -1.627890000000 | -1.160556000000 | H  | -2.701393000000 | 0.387271000000  | 4.388662000000  |
| C | -8.195968000000 | -1.379503000000 | -1.339044000000 | H  | -2.644742000000 | -1.011268000000 | 3.304592000000  |
| C | -6.240618000000 | -2.862266000000 | -1.969621000000 | H  | -6.209447000000 | 1.478773000000  | 3.473945000000  |
| C | -2.656841000000 | 4.317683000000  | 0.007002000000  | H  | -5.854961000000 | 0.375955000000  | 4.809704000000  |
| C | -3.508526000000 | 5.591708000000  | -0.185741000000 | H  | -4.836007000000 | 1.803194000000  | 4.551433000000  |
| C | -1.388526000000 | 4.660932000000  | 0.810224000000  | H  | -6.150429000000 | -0.766316000000 | -1.575811000000 |
| C | -3.460433000000 | 0.674418000000  | -3.565333000000 | H  | -8.780227000000 | -2.230657000000 | -0.969644000000 |
| C | -2.500913000000 | -0.455972000000 | -3.980682000000 | H  | -8.440583000000 | -1.243113000000 | -2.399543000000 |
| C | -4.383936000000 | 1.069577000000  | -4.737435000000 | H  | -8.535681000000 | -0.490159000000 | -0.794388000000 |
| H | 6.610052000000  | 0.949299000000  | 1.274361000000  | H  | -5.169097000000 | -3.046725000000 | -1.851298000000 |
| H | 6.221296000000  | 2.397146000000  | 0.326378000000  | H  | -6.776323000000 | -3.764591000000 | -1.651282000000 |
| H | 7.080237000000  | -0.111583000000 | -0.823723000000 | H  | -6.457769000000 | -2.709633000000 | -3.034405000000 |
| H | 6.260526000000  | 1.166790000000  | -1.737621000000 | H  | -3.233903000000 | 3.604341000000  | 0.603537000000  |
| H | -5.757601000000 | 2.226649000000  | -1.962422000000 | H  | -2.947302000000 | 6.355508000000  | -0.737702000000 |
| H | -5.384286000000 | 3.449537000000  | -0.731113000000 | H  | -3.787544000000 | 6.019184000000  | 0.785068000000  |
| H | -7.038617000000 | 1.175638000000  | -0.219698000000 | H  | -4.428569000000 | 5.396220000000  | -0.747804000000 |
| H | -6.166444000000 | 2.048291000000  | 1.056521000000  | H  | -0.746388000000 | 3.789169000000  | 0.944300000000  |
| H | 3.505630000000  | -1.165232000000 | -5.200424000000 | H  | -0.801676000000 | 5.445464000000  | 0.317290000000  |
| H | 5.992443000000  | -4.075030000000 | -3.294457000000 | H  | -1.665601000000 | 5.035982000000  | 1.802823000000  |
| H | 4.171088000000  | -3.317411000000 | -5.264922000000 | H  | -4.093045000000 | 0.272835000000  | -2.769525000000 |
| H | 3.365155000000  | 2.570329000000  | 4.947943000000  | H  | -1.827850000000 | -0.141137000000 | -4.787718000000 |
| H | 2.668057000000  | 5.201072000000  | 1.647627000000  | H  | -3.071371000000 | -1.320022000000 | -4.339757000000 |
| H | 2.593306000000  | 4.743835000000  | 4.074512000000  | H  | -1.896546000000 | -0.792733000000 | -3.133051000000 |
| H | -5.521162000000 | -2.095897000000 | 4.112428000000  | H  | -5.092580000000 | 1.854753000000  | -4.447659000000 |
| H | -7.373543000000 | -3.593524000000 | 0.557033000000  | H  | -3.808260000000 | 1.444508000000  | -5.592252000000 |
| H | -6.863007000000 | -3.820496000000 | 2.963725000000  | H  | -4.958710000000 | 0.200230000000  | -5.078163000000 |
| H | -1.583776000000 | 2.128903000000  | -4.834508000000 | Cl | 1.986375000000  | -2.481747000000 | -0.971484000000 |
| H | -0.959363000000 | 5.192185000000  | -1.910904000000 | C  | 3.565949000000  | 3.642165000000  | -0.358808000000 |
| H | -0.456753000000 | 4.208307000000  | -4.120977000000 | H  | 3.992110000000  | 2.789335000000  | -0.894759000000 |
| H | 4.317452000000  | -2.443340000000 | 1.204450000000  | C  | 4.486553000000  | 4.852288000000  | -0.618169000000 |
| H | 0.007018000000  | -2.519216000000 | 1.362633000000  | C  | 2.162543000000  | 3.885942000000  | -0.944876000000 |
| H | 4.419124000000  | -3.642534000000 | 3.376743000000  | H  | 1.501934000000  | 3.030116000000  | -0.776106000000 |
| H | 0.111542000000  | -3.666213000000 | 3.553289000000  | H  | 1.691163000000  | 4.765298000000  | -0.490907000000 |
| H | 2.315419000000  | -4.262043000000 | 4.555023000000  | H  | 2.228481000000  | 4.065530000000  | -2.024949000000 |
| H | 6.171379000000  | -2.200340000000 | -0.062415000000 | H  | 4.095879000000  | 5.761033000000  | -0.146289000000 |
| H | 8.059866000000  | -3.596643000000 | -2.038510000000 | H  | 4.566104000000  | 5.046014000000  | -1.694402000000 |
| H | 8.409571000000  | -3.227181000000 | -0.343045000000 | H  | 5.497916000000  | 4.688517000000  | -0.227003000000 |
| H | 8.211907000000  | -1.915460000000 | -1.522582000000 | C  | 4.381419000000  | 0.450527000000  | 3.621695000000  |
| H | 4.786229000000  | -4.303021000000 | -0.261566000000 | H  | 4.542792000000  | -0.255406000000 | 2.801240000000  |
| H | 6.071341000000  | -5.034163000000 | -1.231869000000 | C  | 3.332342000000  | -0.174343000000 | 4.561021000000  |
| H | 6.390910000000  | -4.587304000000 | 0.447243000000  | C  | 5.724802000000  | 0.637551000000  | 4.357445000000  |
| H | 3.342150000000  | 1.088095000000  | -2.233837000000 | H  | 6.498022000000  | 1.050198000000  | 3.698714000000  |
| H | 1.788226000000  | 0.180830000000  | -4.708303000000 | H  | 5.615768000000  | 1.323339000000  | 5.205999000000  |
| H | 1.348850000000  | 1.456694000000  | -3.564949000000 | H  | 6.086192000000  | -0.321792000000 | 4.746664000000  |
| H | 1.360116000000  | -0.237358000000 | -3.042814000000 | H  | 3.182987000000  | 0.434542000000  | 5.460294000000  |
| H | 5.115965000000  | 1.821365000000  | -3.850050000000 | H  | 3.660967000000  | -1.166571000000 | 4.885585000000  |
| H | 4.101091000000  | 1.291490000000  | -5.197223000000 | H  | 2.364588000000  | -0.284312000000 | 4.062727000000  |

Zero-point correction=

|                                              |                             |
|----------------------------------------------|-----------------------------|
| Thermal correction to Energy=                | 1.302786 (Hartree/Particle) |
| Thermal correction to Enthalpy=              | 1.385609                    |
| Thermal correction to Gibbs Free Energy=     | 1.386553                    |
| Sum of electronic and zero-point Energies=   | 1.173057                    |
| Sum of electronic and thermal Energies=      | -6103.042268                |
| Sum of electronic and thermal Enthalpies=    | -6102.959445                |
| Sum of electronic and thermal Free Energies= | -6102.958501                |
|                                              | -6103.171997                |

CPCM (Benzene) PBE0-D3/def2TZVP E = -9065.02749282

CPCM (Benzene) M06L/def2TZVP E = -9068.79039616

### TS-OA-bis-SeCF<sub>3</sub>-PhBr triplet

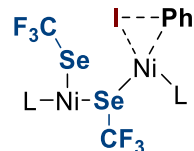

|    |                 |                 |                 |   |                 |                 |                |
|----|-----------------|-----------------|-----------------|---|-----------------|-----------------|----------------|
| Ni | -2.003092000000 | 0.254041000000  | -0.457075000000 | N | -4.885590000000 | -0.484373000000 | 0.624494000000 |
| Ni | 2.143870000000  | 0.001364000000  | -0.501936000000 | N | 4.438637000000  | 1.655859000000  | 0.426747000000 |
| C  | -3.607750000000 | -0.823592000000 | 0.321384000000  | N | 4.445938000000  | -0.311585000000 | 1.376132000000 |
| C  | -5.668013000000 | -1.620489000000 | 1.170784000000  | H | -5.116691000000 | -3.403206000000 | 0.015292000000 |
| C  | -4.763171000000 | -2.812883000000 | 0.867631000000  | H | -6.642938000000 | -1.687364000000 | 0.685166000000 |
| C  | 3.760024000000  | 0.477203000000  | 0.503474000000  | H | 6.553015000000  | 1.491989000000  | 0.445614000000 |
| C  | 5.536951000000  | 0.414854000000  | 2.064416000000  | H | 6.428617000000  | -0.208027000000 | 2.159193000000 |
| C  | 5.726061000000  | 1.624880000000  | 1.155264000000  | C | -2.315164000000 | -2.968078000000 | 0.272880000000 |
| N  | -3.484401000000 | -2.154799000000 | 0.521768000000  | C | -1.509416000000 | -3.383208000000 | 1.359377000000 |

|   |                 |                 |                 |    |                 |                 |                 |
|---|-----------------|-----------------|-----------------|----|-----------------|-----------------|-----------------|
| C | -2.038759000000 | -3.385835000000 | -1.055382000000 | C  | -2.226290000000 | -2.741183000000 | -3.528930000000 |
| C | -0.370956000000 | -4.147903000000 | 1.062001000000  | H  | -2.941628000000 | -2.375388000000 | -4.274893000000 |
| C | -0.889809000000 | -4.150765000000 | -1.282203000000 | H  | -1.471900000000 | -1.968294000000 | -3.361811000000 |
| C | -0.050387000000 | -4.516204000000 | -0.236777000000 | H  | -1.722138000000 | -3.611140000000 | -3.964740000000 |
| H | 0.287116000000  | -4.440309000000 | 1.876489000000  | C  | 3.356295000000  | 4.140938000000  | 1.544585000000  |
| H | -0.630587000000 | -4.437401000000 | -2.294890000000 | H  | 3.379985000000  | 3.156776000000  | 2.021276000000  |
| H | 0.857954000000  | -5.075594000000 | -0.437697000000 | C  | 4.450675000000  | 5.021423000000  | 2.188563000000  |
| C | -5.519097000000 | 0.810352000000  | 0.590325000000  | H  | 5.458216000000  | 4.623849000000  | 2.022883000000  |
| C | -6.386326000000 | 1.113163000000  | -0.489508000000 | H  | 4.429890000000  | 6.035034000000  | 1.770253000000  |
| C | -5.366279000000 | 1.698516000000  | 1.682322000000  | H  | 4.290760000000  | 5.102704000000  | 3.270554000000  |
| C | -7.051604000000 | 2.345563000000  | -0.474740000000 | C  | 1.971892000000  | 4.748870000000  | 1.832746000000  |
| C | -6.061481000000 | 2.914748000000  | 1.643439000000  | H  | 1.171136000000  | 4.172131000000  | 1.368049000000  |
| C | -6.890107000000 | 3.243114000000  | 0.575766000000  | H  | 1.791460000000  | 4.764131000000  | 2.913960000000  |
| H | -7.713307000000 | 2.601428000000  | -1.296645000000 | H  | 1.903210000000  | 5.784195000000  | 1.477007000000  |
| H | -5.953434000000 | 3.612486000000  | 2.467907000000  | C  | 5.273388000000  | 1.439118000000  | -2.412774000000 |
| H | -7.418005000000 | 4.193154000000  | 0.566893000000  | H  | 5.183724000000  | 0.612975000000  | -1.701790000000 |
| C | 4.165273000000  | 2.747207000000  | -0.473954000000 | C  | 6.775040000000  | 1.770330000000  | -2.566986000000 |
| C | 4.528090000000  | 2.642785000000  | -1.839232000000 | H  | 7.326002000000  | 0.889210000000  | -2.917435000000 |
| C | 3.629621000000  | 3.946083000000  | 0.054856000000  | H  | 6.923347000000  | 2.572072000000  | -3.300486000000 |
| C | 4.269074000000  | 3.737981000000  | -2.673593000000 | H  | 7.226001000000  | 2.101418000000  | -1.624344000000 |
| C | 3.406196000000  | 5.014299000000  | -0.823527000000 | C  | 4.702108000000  | 0.943870000000  | -3.753598000000 |
| C | 3.707354000000  | 4.910291000000  | -2.178295000000 | H  | 5.223567000000  | 0.030997000000  | -4.060990000000 |
| H | 4.526944000000  | 3.674532000000  | -3.726163000000 | H  | 3.637795000000  | 0.700980000000  | -3.670675000000 |
| H | 2.996779000000  | 5.943383000000  | -0.437518000000 | H  | 4.840714000000  | 1.682509000000  | -4.552453000000 |
| H | 3.521431000000  | 5.748822000000  | -2.844736000000 | C  | 5.391316000000  | -2.417055000000 | -0.446443000000 |
| C | 4.174925000000  | -1.686335000000 | 1.716253000000  | H  | 4.927933000000  | -1.533447000000 | -0.897299000000 |
| C | 3.547288000000  | -1.985796000000 | 2.946052000000  | C  | 6.879786000000  | -2.099160000000 | -0.183602000000 |
| C | 4.645302000000  | -2.713576000000 | 0.856895000000  | H  | 7.378159000000  | -2.953780000000 | 0.290402000000  |
| C | 3.388121000000  | -3.333076000000 | 3.299280000000  | H  | 7.395432000000  | -1.891649000000 | -1.128966000000 |
| C | 4.445752000000  | -4.040271000000 | 1.255823000000  | H  | 7.017904000000  | -1.230733000000 | 0.465780000000  |
| C | 3.827996000000  | -4.352433000000 | 2.464471000000  | C  | 5.304517000000  | -3.549685000000 | -1.484437000000 |
| H | 2.913622000000  | -3.581981000000 | 4.244320000000  | H  | 5.896788000000  | -4.422623000000 | -1.182787000000 |
| H | 4.784972000000  | -4.845649000000 | 0.614072000000  | H  | 4.274340000000  | -3.863514000000 | -1.656631000000 |
| H | 3.696347000000  | -5.391919000000 | 2.754730000000  | H  | 5.708200000000  | -3.198159000000 | -2.439800000000 |
| C | -1.753133000000 | -3.178289000000 | 2.863499000000  | C  | 3.065186000000  | -0.910649000000 | 3.916191000000  |
| H | -0.745707000000 | -3.107473000000 | 3.292377000000  | H  | 3.099931000000  | 0.052478000000  | 3.400245000000  |
| C | -2.391920000000 | -4.447995000000 | 3.472897000000  | C  | 3.976041000000  | -0.834704000000 | 5.160363000000  |
| H | -2.447589000000 | -4.360407000000 | 4.564897000000  | H  | 5.024893000000  | -0.659536000000 | 4.895543000000  |
| H | -3.411718000000 | -4.607379000000 | 3.101099000000  | H  | 3.652305000000  | -0.024386000000 | 5.824902000000  |
| H | -1.811276000000 | -5.344139000000 | 3.230873000000  | H  | 3.935469000000  | -1.770517000000 | 5.730702000000  |
| C | -2.488879000000 | -1.922818000000 | 3.351430000000  | C  | 1.601833000000  | -1.124509000000 | 4.344209000000  |
| H | -3.561875000000 | -1.948421000000 | 3.140552000000  | H  | 0.952186000000  | -1.218231000000 | 3.470220000000  |
| H | -2.380925000000 | -1.856684000000 | 4.441249000000  | H  | 1.487169000000  | -2.023502000000 | 4.961855000000  |
| H | -2.063069000000 | -1.015490000000 | 2.920755000000  | H  | 1.252540000000  | -0.269950000000 | 4.933899000000  |
| C | -4.523547000000 | 1.371798000000  | 2.912081000000  | C  | -2.023868000000 | 2.213889000000  | -1.170090000000 |
| H | -3.881194000000 | 0.522375000000  | 2.668927000000  | C  | -3.000999000000 | 3.051358000000  | -0.628223000000 |
| C | -5.428303000000 | 0.960102000000  | 4.094178000000  | C  | -0.763151000000 | 2.697766000000  | -1.544776000000 |
| H | -6.072505000000 | 1.793023000000  | 4.401206000000  | C  | -2.651947000000 | 4.370442000000  | -0.321298000000 |
| H | -6.081218000000 | 0.117429000000  | 3.840194000000  | H  | -4.002345000000 | 2.688831000000  | -0.441653000000 |
| H | -4.818905000000 | 0.669420000000  | 4.957825000000  | C  | -0.439195000000 | 4.018033000000  | -1.237287000000 |
| C | -3.602175000000 | 2.531544000000  | 3.334014000000  | H  | -0.045874000000 | 2.055467000000  | -2.042457000000 |
| H | -2.970518000000 | 2.866419000000  | 2.507739000000  | C  | -1.377648000000 | 4.854444000000  | -0.621769000000 |
| H | -4.175462000000 | 3.391005000000  | 3.701690000000  | H  | -3.395110000000 | 5.019936000000  | 0.134094000000  |
| H | -2.942595000000 | 2.205054000000  | 4.143946000000  | H  | 0.550606000000  | 4.388737000000  | -1.488538000000 |
| C | -6.674982000000 | 0.139427000000  | -1.631407000000 | H  | -1.121460000000 | 5.886511000000  | -0.398855000000 |
| H | -5.942788000000 | -0.672445000000 | -1.577030000000 | H  | -5.829866000000 | -1.473133000000 | 2.244811000000  |
| C | -8.087401000000 | -0.470515000000 | -1.485454000000 | H  | -4.634742000000 | -3.483705000000 | 1.719216000000  |
| H | -8.237967000000 | -0.953612000000 | -0.513602000000 | H  | 5.890568000000  | 2.551771000000  | 1.707063000000  |
| H | -8.857101000000 | 0.304033000000  | -1.584722000000 | H  | 5.216209000000  | 0.710578000000  | 3.070352000000  |
| H | -8.263238000000 | -1.218806000000 | -2.267318000000 | Se | 1.212877000000  | -0.509584000000 | -2.628415000000 |
| C | -6.536178000000 | 0.786487000000  | -3.022729000000 | C  | 1.962194000000  | -2.260902000000 | -3.018781000000 |
| H | -5.553262000000 | 1.244808000000  | -3.151876000000 | F  | 3.197504000000  | -2.203104000000 | -3.584330000000 |
| H | -6.661511000000 | 0.023889000000  | -3.800384000000 | F  | 1.188060000000  | -2.965015000000 | -3.884481000000 |
| H | -7.301829000000 | 1.552333000000  | -3.192554000000 | F  | 2.101877000000  | -3.053910000000 | -1.916653000000 |
| C | -2.973507000000 | -3.109897000000 | -2.232444000000 | Se | 0.049039000000  | -0.060813000000 | 0.905866000000  |
| H | -3.615256000000 | -2.261852000000 | -1.974689000000 | C  | 0.002701000000  | 1.381004000000  | 2.224641000000  |
| C | -3.881861000000 | -4.333522000000 | -2.493900000000 | F  | 1.244796000000  | 1.689226000000  | 2.681578000000  |
| H | -4.587463000000 | -4.119301000000 | -3.305898000000 | F  | -0.725918000000 | 1.048409000000  | 3.325836000000  |
| H | -3.281320000000 | -5.201265000000 | -2.791463000000 | F  | -0.534533000000 | 2.535627000000  | 1.763594000000  |
| H | -4.459267000000 | -4.625754000000 | -1.609351000000 | Br | -2.796827000000 | 0.687775000000  | -2.684500000000 |

|                                              |                             |
|----------------------------------------------|-----------------------------|
| Zero-point correction=                       | 1.318583 (Hartree/Particle) |
| Thermal correction to Energy=                | 1.404922                    |
| Thermal correction to Enthalpy=              | 1.405867                    |
| Thermal correction to Gibbs Free Energy=     | 1.188809                    |
| Sum of electronic and zero-point Energies=   | -10939.356262               |
| Sum of electronic and thermal Energies=      | -10939.269922               |
| Sum of electronic and thermal Enthalpies=    | -10939.268978               |
| Sum of electronic and thermal Free Energies= | -10939.486035               |

CPCM (Benzene) PBE0-D3/def2TZVP E = -13619.8219461  
CPCM (Benzene) M06L/def2TZVP E = -13623.9532794

# TS-OA-bis-SeCF<sub>3</sub>-PhCl triplet

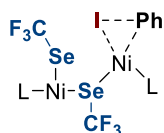

|    |                 |                 |                 |    |                 |                 |                 |
|----|-----------------|-----------------|-----------------|----|-----------------|-----------------|-----------------|
| Ni | 2.069335000000  | -0.379654000000 | -0.576237000000 | H  | 5.564427000000  | -1.705829000000 | -2.918864000000 |
| Ni | -2.225442000000 | -0.216024000000 | -0.516753000000 | H  | 6.750174000000  | -0.599831000000 | -3.631680000000 |
| C  | 3.705787000000  | 0.661308000000  | 0.195101000000  | H  | 7.291852000000  | -2.117654000000 | -2.910557000000 |
| C  | 5.721850000000  | 1.408437000000  | 1.187352000000  | C  | 3.677736000000  | 2.742786000000  | -2.635024000000 |
| C  | 4.945521000000  | 2.621067000000  | 0.674501000000  | H  | 4.209916000000  | 1.890884000000  | -2.200290000000 |
| C  | -3.823229000000 | -0.089717000000 | 0.619039000000  | C  | 4.693928000000  | 3.887777000000  | -2.853042000000 |
| C  | -5.615314000000 | 0.650176000000  | 1.985846000000  | H  | 5.508782000000  | 3.557929000000  | -3.508954000000 |
| C  | -5.853653000000 | -0.815156000000 | 1.613468000000  | H  | 4.206565000000  | 4.746419000000  | -4.585841000000 |
| N  | 3.673952000000  | 2.012310000000  | 0.226889000000  | H  | 5.134454000000  | 4.245428000000  | -1.915886000000 |
| N  | 4.906555000000  | 0.272546000000  | 0.688395000000  | C  | 3.129187000000  | 2.288864000000  | -4.002130000000 |
| N  | -4.767133000000 | -1.068137000000 | 0.645446000000  | H  | 3.932772000000  | 1.824909000000  | -4.585841000000 |
| N  | -4.253985000000 | 0.892028000000  | 1.456721000000  | H  | 2.317506000000  | 1.566778000000  | -3.901967000000 |
| H  | 5.440399000000  | 3.111678000000  | -0.169915000000 | H  | 2.756638000000  | 3.138397000000  | -4.587060000000 |
| H  | 6.738820000000  | 1.353374000000  | 0.794343000000  | C  | -3.607272000000 | -3.552458000000 | 1.730297000000  |
| H  | -6.831319000000 | -0.989385000000 | 1.156739000000  | H  | -3.427507000000 | -2.536398000000 | 2.092468000000  |
| H  | -6.329030000000 | 1.329394000000  | 1.502254000000  | C  | -4.591753000000 | -4.243482000000 | 2.699549000000  |
| C  | 2.616744000000  | 2.861967000000  | -0.270756000000 | H  | -5.560548000000 | -3.732640000000 | 2.738521000000  |
| C  | 1.680170000000  | 3.414927000000  | 0.632504000000  | H  | -4.780512000000 | -5.278693000000 | 2.390069000000  |
| C  | 2.588690000000  | 3.179435000000  | -1.654801000000 | H  | -4.177830000000 | -4.266900000000 | 3.714999000000  |
| C  | 0.648080000000  | 4.197761000000  | 0.090797000000  | C  | -2.253715000000 | -4.283161000000 | 1.749673000000  |
| C  | 1.549381000000  | 3.987379000000  | -2.125898000000 | H  | -1.553952000000 | -3.851840000000 | 1.031178000000  |
| C  | 0.570753000000  | 4.474577000000  | -1.267309000000 | H  | -1.801024000000 | -4.204682000000 | 2.743941000000  |
| H  | -0.112068000000 | 4.590233000000  | 0.760702000000  | H  | -2.366451000000 | -5.350308000000 | 1.523150000000  |
| H  | 1.495182000000  | 4.221733000000  | -3.183678000000 | C  | -6.213421000000 | -0.996989000000 | -1.907011000000 |
| H  | -0.249226000000 | 5.071708000000  | -1.656532000000 | H  | -5.933706000000 | -0.150738000000 | -1.272474000000 |
| C  | 5.484338000000  | -1.046867000000 | 0.761073000000  | C  | -7.734901000000 | -1.219023000000 | -1.755607000000 |
| C  | 6.380915000000  | -1.446820000000 | -0.261886000000 | H  | -8.285159000000 | -0.316132000000 | -2.046830000000 |
| C  | 5.248737000000  | -1.860726000000 | 1.894446000000  | H  | -8.074695000000 | -2.039963000000 | -2.398313000000 |
| C  | 7.004474000000  | -2.695125000000 | -0.140900000000 | H  | -8.016214000000 | -1.472199000000 | -0.726614000000 |
| C  | 5.906541000000  | -3.096511000000 | 1.962940000000  | C  | -5.876626000000 | -0.607253000000 | -3.357813000000 |
| C  | 6.771300000000  | -3.515915000000 | 0.957556000000  | H  | -6.405083000000 | 0.316265000000  | -3.624961000000 |
| H  | 7.687948000000  | -3.024945000000 | -0.917532000000 | H  | -4.803746000000 | -0.438665000000 | -3.485603000000 |
| H  | 5.739638000000  | -3.738616000000 | 2.821713000000  | H  | -6.192900000000 | -1.378980000000 | -4.069864000000 |
| H  | 7.268573000000  | -4.479428000000 | 1.033102000000  | C  | -4.723400000000 | 2.942868000000  | -0.627351000000 |
| C  | -4.781314000000 | -2.259448000000 | -0.164808000000 | H  | -4.910662000000 | 1.868827000000  | -0.702210000000 |
| C  | -5.448818000000 | -2.223558000000 | -1.413281000000 | C  | -6.090407000000 | 3.657866000000  | -0.566303000000 |
| C  | -4.211739000000 | -3.453588000000 | 0.332978000000  | H  | -5.965981000000 | 4.746853000000  | -0.530088000000 |
| C  | -5.467600000000 | -3.393344000000 | -2.182491000000 | H  | -6.685060000000 | 3.419704000000  | -1.456298000000 |
| C  | -4.267338000000 | -4.596432000000 | -0.475679000000 | H  | -6.668637000000 | 3.364341000000  | 0.317984000000  |
| C  | -4.875681000000 | -4.567021000000 | -1.726623000000 | C  | -3.957507000000 | 3.348756000000  | -1.898798000000 |
| H  | -5.960593000000 | -3.385948000000 | -3.150007000000 | H  | -3.769309000000 | 4.429144000000  | -1.930934000000 |
| H  | -3.832215000000 | -5.524482000000 | -0.116814000000 | H  | -3.000786000000 | 2.828167000000  | -1.974319000000 |
| H  | -4.900955000000 | -5.463238000000 | -2.341274000000 | H  | -4.545748000000 | 3.091118000000  | -2.787074000000 |
| C  | -3.689727000000 | 2.205513000000  | 1.626088000000  | C  | -2.806048000000 | 1.472396000000  | 3.935054000000  |
| C  | -3.023528000000 | 2.508075000000  | 2.836042000000  | H  | -3.073147000000 | 0.492985000000  | 3.527648000000  |
| C  | -3.922280000000 | 3.198953000000  | 0.646045000000  | C  | -3.708506000000 | 1.751039000000  | 5.155665000000  |
| C  | -2.576533000000 | 3.820100000000  | 3.036140000000  | H  | -4.770058000000 | 1.788667000000  | 4.885160000000  |
| C  | -3.445136000000 | 4.492933000000  | 0.893652000000  | H  | -3.579584000000 | 0.969668000000  | 5.914399000000  |
| C  | -2.781560000000 | 4.806636000000  | 2.075595000000  | H  | -3.456077000000 | 2.712168000000  | 5.619778000000  |
| C  | -2.068850000000 | 4.073604000000  | 3.962475000000  | C  | -1.331573000000 | 1.394190000000  | 4.370389000000  |
| H  | -3.614771000000 | 5.269979000000  | 0.153795000000  | H  | -0.677626000000 | 1.254839000000  | 3.506954000000  |
| H  | -2.435043000000 | 5.821857000000  | 2.253503000000  | H  | -1.018314000000 | 2.304108000000  | 4.896978000000  |
| C  | 1.692047000000  | 3.362876000000  | 2.169302000000  | H  | -1.180529000000 | 0.549298000000  | 5.051627000000  |
| H  | 0.631887000000  | 3.321897000000  | 2.449459000000  | C  | 2.055275000000  | -2.368285000000 | -1.164664000000 |
| C  | 2.244516000000  | 4.698583000000  | 2.720967000000  | C  | 2.985215000000  | -3.209086000000 | -0.554004000000 |
| H  | 2.154084000000  | 4.726865000000  | 3.813744000000  | C  | 0.791634000000  | -2.808366000000 | -1.567738000000 |
| H  | 3.305797000000  | 4.825181000000  | 2.471470000000  | C  | 2.572900000000  | -4.498889000000 | -0.202969000000 |
| H  | 1.706227000000  | 5.559039000000  | 2.310716000000  | H  | 3.992780000000  | -2.875371000000 | -0.348376000000 |
| C  | 2.357081000000  | 2.185993000000  | 2.896446000000  | C  | 0.408136000000  | -4.101418000000 | -1.210055000000 |
| H  | 3.449826000000  | 2.217570000000  | 2.848907000000  | H  | 0.107721000000  | -2.163366000000 | -2.113683000000 |
| H  | 2.085573000000  | 2.236818000000  | 3.958090000000  | C  | 1.289805000000  | -4.945251000000 | -0.525719000000 |
| H  | 2.011067000000  | 1.226272000000  | 2.513807000000  | H  | 3.273866000000  | -5.155077000000 | 0.306464000000  |
| C  | 4.349503000000  | -1.435738000000 | 3.051806000000  | H  | -0.585488000000 | -4.446047000000 | -1.484100000000 |
| H  | 3.714332000000  | -0.615457000000 | 2.706139000000  | H  | 0.985378000000  | -5.955949000000 | -0.268138000000 |
| C  | 5.194673000000  | -0.918442000000 | 4.236743000000  | H  | 5.775490000000  | 1.370573000000  | 2.280460000000  |
| H  | 5.824937000000  | -1.718204000000 | 4.644486000000  | H  | 4.761725000000  | 3.372501000000  | 1.445829000000  |
| H  | 5.857540000000  | -0.096213000000 | 3.945086000000  | H  | -5.754073000000 | -1.485000000000 | 2.476121000000  |
| H  | 4.543210000000  | -0.559180000000 | 5.041908000000  | H  | -5.652675000000 | 0.820815000000  | 3.063207000000  |
| C  | 3.417363000000  | -2.565514000000 | 3.528148000000  | Se | -2.044686000000 | -0.490344000000 | -2.880622000000 |
| H  | 2.822882000000  | -2.970206000000 | 2.705017000000  | C  | -0.766364000000 | 0.892258000000  | -3.360531000000 |
| H  | 3.978744000000  | -3.387473000000 | 3.987744000000  | F  | -0.075936000000 | 0.574969000000  | -4.482580000000 |
| H  | 2.723717000000  | -2.180507000000 | 4.281247000000  | F  | 0.184405000000  | 1.114676000000  | -2.395548000000 |
| C  | 6.733344000000  | -0.566080000000 | -1.459438000000 | F  | -1.322185000000 | 2.108901000000  | -3.595365000000 |
| H  | 6.042972000000  | 0.283114000000  | -1.470474000000 | Se | -0.033123000000 | 0.097759000000  | 0.702849000000  |
| C  | 8.171472000000  | -0.015527000000 | -1.335251000000 | C  | 0.024623000000  | -1.221280000000 | 2.142710000000  |
| H  | 8.332525000000  | 0.527140000000  | -0.396888000000 | F  | -1.187505000000 | -1.380430000000 | 2.735955000000  |
| H  | 8.905561000000  | -0.829136000000 | -1.369906000000 | F  | 0.876695000000  | -0.846125000000 | 3.138182000000  |
| H  | 8.391212000000  | 0.667827000000  | -2.164013000000 | F  | 0.428024000000  | -2.452499000000 | 1.755419000000  |
| C  | 6.571384000000  | -1.298102000000 | -2.805609000000 | Cl | 2.889694000000  | -0.979062000000 | -2.616509000000 |

Zero-point correction= 1.138610 (Hartree/Particle)  
 Thermal correction to Energy= 1.404930  
 Thermal correction to Enthalpy= 1.405874  
 Thermal correction to Gibbs Free Energy= 1.189139  
 Sum of electronic and zero-point Energies= -8828.139709  
 Sum of electronic and thermal Energies= -8828.053390  
 Sum of electronic and thermal Enthalpies= -8828.052446  
 Sum of electronic and thermal Free Energies= -8828.269181  
 CPCM (Benzene) PBE0-D3/def2TZVP E = -11506.0168504  
 CPCM (Benzene) M06L/def2TZVP E = -11510.0921308

### TS-OA-bis-SeCF<sub>3</sub>-PhSeCF<sub>3</sub> triplet

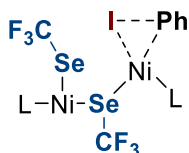

|    |                 |                 |                 |   |                 |                 |                 |
|----|-----------------|-----------------|-----------------|---|-----------------|-----------------|-----------------|
| Ni | -1.914877000000 | 0.272960000000  | -0.164650000000 | H | -1.736774000000 | -1.898410000000 | 2.720300000000  |
| Ni | 2.233990000000  | 0.104702000000  | -0.407372000000 | C | -4.245115000000 | 0.246635000000  | 3.480557000000  |
| C  | -3.425120000000 | -1.117533000000 | 0.350012000000  | H | -3.560374000000 | -0.436590000000 | 2.972953000000  |
| C  | -5.375414000000 | -2.246779000000 | 1.065413000000  | C | -5.022723000000 | -0.563350000000 | 4.541692000000  |
| C  | -4.439242000000 | -3.249894000000 | 0.399363000000  | H | -5.704945000000 | 0.085819000000  | 5.103740000000  |
| C  | 3.893577000000  | 0.358773000000  | 0.609714000000  | H | -5.624942000000 | -1.362013000000 | 4.094373000000  |
| C  | 5.752763000000  | -0.035868000000 | 2.017088000000  | H | -4.328108000000 | -1.021325000000 | 5.255543000000  |
| C  | 5.869103000000  | 1.368669000000  | 1.434747000000  | C | -3.385467000000 | 1.320881000000  | 4.173025000000  |
| N  | -3.219465000000 | -2.441927000000 | 0.179515000000  | H | -2.848427000000 | 1.938205000000  | 3.448939000000  |
| N  | -4.696728000000 | -0.953662000000 | 0.797106000000  | H | -3.991954000000 | 1.979182000000  | 4.805944000000  |
| N  | 4.541459000000  | 1.540660000000  | 0.804231000000  | H | -2.642113000000 | 0.840642000000  | 4.815976000000  |
| N  | 4.644373000000  | -0.602279000000 | 1.215566000000  | C | -6.765646000000 | 0.082305000000  | -1.043226000000 |
| H  | -4.820647000000 | -3.605730000000 | -0.563869000000 | H | -5.979300000000 | -0.639376000000 | -1.289212000000 |
| H  | -6.378812000000 | -2.250210000000 | 0.639087000000  | C | -8.104152000000 | -0.681310000000 | -0.912592000000 |
| H  | 6.656224000000  | 1.443116000000  | 0.672756000000  | H | -8.103241000000 | -1.402160000000 | -0.087794000000 |
| H  | 6.660661000000  | -0.632996000000 | 1.913671000000  | H | -8.929232000000 | 0.016947000000  | -0.729196000000 |
| C  | -2.033153000000 | -3.099204000000 | -0.325463000000 | H | -8.325634000000 | -1.224862000000 | -1.838669000000 |
| C  | -1.152010000000 | -3.739609000000 | 0.578800000000  | C | -6.866942000000 | 1.071591000000  | -2.220535000000 |
| C  | -1.828029000000 | -3.164583000000 | -1.728759000000 | H | -5.954201000000 | 1.661360000000  | -2.324963000000 |
| C  | -0.010432000000 | -4.352557000000 | 0.040333000000  | H | -7.026719000000 | 0.519471000000  | -3.154058000000 |
| C  | -0.669764000000 | -3.792153000000 | -2.198484000000 | H | -7.712933000000 | 1.758204000000  | -2.101656000000 |
| C  | 0.241624000000  | -4.370042000000 | -1.323708000000 | C | -2.847427000000 | -2.667593000000 | -2.752601000000 |
| H  | 0.703454000000  | -4.811222000000 | 0.719966000000  | H | -3.520124000000 | -1.959920000000 | -2.258934000000 |
| H  | -0.465853000000 | -3.806187000000 | -3.262954000000 | C | -3.697903000000 | -3.847448000000 | -3.276230000000 |
| H  | 1.151580000000  | -4.821656000000 | -1.705322000000 | H | -4.463018000000 | -3.486645000000 | -3.974488000000 |
| C  | -5.405445000000 | 0.251383000000  | 1.163704000000  | H | -3.068298000000 | -4.568112000000 | -3.811143000000 |
| C  | -6.397311000000 | 0.751748000000  | 0.281003000000  | H | -4.201858000000 | -4.392344000000 | -2.469769000000 |
| C  | -5.204927000000 | 0.824223000000  | 2.443608000000  | C | -2.205106000000 | -1.928461000000 | -3.942294000000 |
| C  | -7.126726000000 | 1.877997000000  | 0.681292000000  | H | -2.982448000000 | -1.423217000000 | -4.526765000000 |
| C  | -5.971650000000 | 1.945439000000  | 2.789821000000  | H | -1.480472000000 | -1.180284000000 | -3.613229000000 |
| C  | -6.914653000000 | 2.477522000000  | 1.917974000000  | H | -1.688144000000 | -2.621331000000 | -4.616135000000 |
| H  | -7.880877000000 | 2.285522000000  | 0.015347000000  | C | 3.422499000000  | 3.614720000000  | 2.546894000000  |
| H  | -5.829878000000 | 2.404001000000  | 3.763282000000  | H | 3.474566000000  | 2.540923000000  | 2.748580000000  |
| H  | -7.494402000000 | 3.350084000000  | 2.207424000000  | C | 4.522507000000  | 4.319802000000  | 3.371643000000  |
| C  | 4.201347000000  | 2.813820000000  | 0.219672000000  | H | 5.530567000000  | 3.999583000000  | 3.085363000000  |
| C  | 4.515012000000  | 3.071529000000  | -1.136883000000 | H | 4.475585000000  | 5.406501000000  | 3.231160000000  |
| C  | 3.653263000000  | 3.818994000000  | 1.051770000000  | H | 4.391740000000  | 4.114536000000  | 4.441085000000  |
| C  | 4.197803000000  | 4.333144000000  | -1.656734000000 | C | 2.038867000000  | 4.099674000000  | 3.015920000000  |
| C  | 3.369241000000  | 5.066379000000  | 0.481510000000  | H | 1.234145000000  | 3.670742000000  | 2.417268000000  |
| C  | 3.623948000000  | 5.320801000000  | -0.862929000000 | H | 1.876303000000  | 3.806579000000  | 4.059528000000  |
| H  | 4.418599000000  | 4.547134000000  | -2.697876000000 | H | 1.956691000000  | 5.192320000000  | 2.967842000000  |
| H  | 2.947644000000  | 5.850997000000  | 1.102917000000  | C | 5.263221000000  | 2.077614000000  | -2.022928000000 |
| H  | 3.391384000000  | 6.294054000000  | -1.287717000000 | H | 5.251672000000  | 1.102763000000  | -1.527317000000 |
| C  | 4.426583000000  | -2.027391000000 | 1.209337000000  | C | 6.738275000000  | 2.510620000000  | -2.178373000000 |
| C  | 3.869577000000  | -2.646879000000 | 2.350060000000  | H | 7.297038000000  | 1.763222000000  | -2.754415000000 |
| C  | 4.886802000000  | -2.790669000000 | 0.103799000000  | H | 6.809541000000  | 3.466208000000  | -2.711815000000 |
| C  | 3.767906000000  | -4.045092000000 | 2.364213000000  | H | 7.236530000000  | 2.637431000000  | -1.210109000000 |
| C  | 4.747088000000  | -4.181891000000 | 0.169682000000  | C | 4.616198000000  | 1.888363000000  | -3.406738000000 |
| C  | 4.198275000000  | -4.807892000000 | 1.286349000000  | H | 5.150963000000  | 1.109498000000  | -3.962473000000 |
| H  | 3.347573000000  | -4.538288000000 | 3.236103000000  | H | 3.571605000000  | 1.578835000000  | -3.318150000000 |
| H  | 5.078760000000  | -4.790309000000 | -0.663962000000 | H | 4.662358000000  | 2.806526000000  | -4.004700000000 |
| H  | 4.113322000000  | -5.891456000000 | 1.314535000000  | C | 5.553913000000  | -2.152885000000 | -1.118393000000 |
| C  | -1.313917000000 | -3.946020000000 | 2.094195000000  | H | 5.021882000000  | -1.220784000000 | -1.335537000000 |
| H  | -0.287573000000 | -3.923928000000 | 2.481183000000  | C | 7.034986000000  | -1.809835000000 | -0.844961000000 |
| C  | -1.849491000000 | -5.368989000000 | 2.377411000000  | H | 7.598321000000  | -2.714069000000 | -0.583412000000 |
| H  | -1.843981000000 | -5.570318000000 | 3.455599000000  | H | 7.493145000000  | -1.377058000000 | -1.742342000000 |
| H  | -2.880531000000 | -5.492824000000 | 2.023075000000  | H | 7.160482000000  | -1.090536000000 | -0.031969000000 |
| H  | -1.239881000000 | -6.132501000000 | 1.883517000000  | C | 5.480339000000  | -3.018186000000 | -2.389052000000 |
| C  | -2.082382000000 | -2.911672000000 | 2.926078000000  | H | 6.135176000000  | -3.895785000000 | -2.320291000000 |
| H  | -3.164098000000 | -2.958852000000 | 2.771897000000  | H | 4.462519000000  | -3.351217000000 | -2.595323000000 |
| H  | -1.904773000000 | -3.115090000000 | 3.989317000000  | H | 5.816541000000  | -2.428187000000 | -3.248071000000 |

|    |                 |                 |                 |    |                 |                 |                 |
|----|-----------------|-----------------|-----------------|----|-----------------|-----------------|-----------------|
| C  | 3.399551000000  | -1.867676000000 | 3.575689000000  | H  | 0.396748000000  | 4.696593000000  | -0.266207000000 |
| H  | 3.402803000000  | -0.803206000000 | 3.327382000000  | H  | -1.301866000000 | 5.883342000000  | 1.122576000000  |
| C  | 4.345150000000  | -2.089308000000 | 4.775241000000  | H  | -5.461305000000 | -2.397535000000 | 2.147220000000  |
| H  | 5.381363000000  | -1.823003000000 | 4.537906000000  | H  | -4.219760000000 | -4.117935000000 | 1.023525000000  |
| H  | 4.025269000000  | -1.484828000000 | 5.632597000000  | H  | 6.048179000000  | 2.132554000000  | 2.192996000000  |
| H  | 4.341612000000  | -3.140322000000 | 5.088357000000  | H  | 5.476189000000  | -0.012507000000 | 3.077999000000  |
| C  | 1.952670000000  | -2.221216000000 | 3.965089000000  | Se | 1.209518000000  | 0.066825000000  | -2.552893000000 |
| H  | 1.280087000000  | -2.093670000000 | 3.112616000000  | C  | 2.064720000000  | -1.479935000000 | -3.363357000000 |
| H  | 1.870506000000  | -3.255114000000 | 4.321590000000  | F  | 3.279223000000  | -1.196767000000 | -3.907845000000 |
| H  | 1.605990000000  | -1.563785000000 | 4.769718000000  | F  | 1.317822000000  | -2.006289000000 | -4.367883000000 |
| Se | -3.198839000000 | 0.977516000000  | -1.969829000000 | F  | 2.287870000000  | -2.505661000000 | -2.490931000000 |
| C  | -1.970877000000 | 2.271520000000  | -0.111197000000 | Se | 0.183921000000  | -0.324565000000 | 1.004752000000  |
| C  | -2.950391000000 | 2.942477000000  | 0.623176000000  | C  | 0.170254000000  | 0.687001000000  | 2.682656000000  |
| C  | -0.779989000000 | 2.914925000000  | -0.470471000000 | F  | 1.430333000000  | 0.890077000000  | 3.146475000000  |
| C  | -2.691955000000 | 4.235324000000  | 1.091163000000  | F  | -0.490003000000 | 0.024455000000  | 3.671772000000  |
| H  | -3.903088000000 | 2.474043000000  | 0.831502000000  | F  | -0.411298000000 | 1.902702000000  | 2.599020000000  |
| C  | -0.541686000000 | 4.211986000000  | -0.011001000000 | C  | -2.474990000000 | 2.338803000000  | -3.211255000000 |
| H  | -0.030423000000 | 2.416663000000  | -1.074870000000 | F  | -3.103006000000 | 2.122591000000  | -4.387934000000 |
| C  | -1.491478000000 | 4.871409000000  | 0.774296000000  | F  | -2.750088000000 | 3.599029000000  | -2.830360000000 |
| H  | -3.448616000000 | 4.748045000000  | 1.679948000000  | F  | -1.157302000000 | 2.255938000000  | -3.427840000000 |

```

Zero-point correction=          1.333748 (Hartree/Particle)
Thermal correction to Energy=    1.424148
Thermal correction to Enthalpy=  1.425092
Thermal correction to Gibbs Free Energy= 1.198377
Sum of electronic and zero-point Energies= -11104.472318
Sum of electronic and thermal Energies= -11104.381919
Sum of electronic and thermal Enthalpies= -11104.380975
Sum of electronic and thermal Free Energies= -11104.607690
CPCM (Benzene) PBE0-D3/def2TZVP E = -13784.6922876
CPCM (Benzene) M06L/def2TZVP E = -13789.0931929

```

## SIPr-Ni-cod ( $\omega$ B97XD opt.)

|    |                 |                 |                 |   |                 |                 |                 |
|----|-----------------|-----------------|-----------------|---|-----------------|-----------------|-----------------|
| Ni | 0.000039000000  | -0.000289000000 | 1.149471000000  | C | -4.967323000000 | -0.106182000000 | 0.018296000000  |
| C  | -1.433389000000 | 0.775811000000  | 2.442025000000  | H | -5.027186000000 | 1.993023000000  | -0.404597000000 |
| H  | -2.193412000000 | 1.152989000000  | 1.756710000000  | H | -4.664287000000 | -2.207583000000 | 0.309036000000  |
| C  | -0.302055000000 | 1.535888000000  | 2.621741000000  | H | -5.962823000000 | -0.117440000000 | 0.452789000000  |
| H  | -0.232416000000 | 2.462307000000  | 2.055154000000  | C | 2.556186000000  | -2.428167000000 | -1.522385000000 |
| C  | 0.731690000000  | 1.349597000000  | 3.711271000000  | H | 1.800590000000  | -2.175864000000 | -2.273819000000 |
| H  | 0.256410000000  | 0.988162000000  | 4.628184000000  | C | 2.163323000000  | 2.584589000000  | -0.717074000000 |
| H  | 1.170064000000  | 2.322108000000  | 3.964101000000  | H | 1.119597000000  | 2.327351000000  | -0.916641000000 |
| C  | 1.876188000000  | 0.394649000000  | 3.289057000000  | C | -2.163619000000 | -2.584199000000 | -0.718499000000 |
| H  | 2.608990000000  | 0.957919000000  | 2.699199000000  | H | -1.119865000000 | -2.326985000000 | -0.917963000000 |
| H  | 2.409786000000  | 0.042945000000  | 4.185078000000  | C | -2.555873000000 | 2.429033000000  | -1.521058000000 |
| C  | 1.433427000000  | -0.777396000000 | 2.441708000000  | H | -1.800166000000 | 2.177035000000  | -2.272486000000 |
| H  | 2.193447000000  | -1.154066000000 | 1.756112000000  | C | -2.180082000000 | -3.405641000000 | 0.574672000000  |
| C  | 0.302107000000  | -1.537608000000 | 2.620769000000  | H | -1.891142000000 | -2.787231000000 | 1.428304000000  |
| H  | 0.232528000000  | -2.463576000000 | 2.053441000000  | H | -3.169282000000 | -3.832897000000 | 0.776658000000  |
| C  | -0.731794000000 | -1.352062000000 | 3.710266000000  | H | -1.470984000000 | -4.237812000000 | 0.499494000000  |
| H  | -0.256612000000 | -0.991322000000 | 4.627508000000  | C | -2.683533000000 | -3.416984000000 | -1.899944000000 |
| H  | -1.170239000000 | -2.324744000000 | 3.962314000000  | H | -2.633728000000 | -2.854886000000 | -2.838950000000 |
| C  | -1.876221000000 | -0.396753000000 | 3.288627000000  | H | -2.093381000000 | -4.333350000000 | -2.015761000000 |
| H  | -2.609066000000 | -0.959600000000 | 2.698426000000  | C | -3.729649000000 | -3.705390000000 | -1.741804000000 |
| H  | -2.409775000000 | -0.045580000000 | 4.184881000000  | C | -3.580329000000 | 3.348515000000  | -2.194084000000 |
| C  | 0.000070000000  | 0.000134000000  | -0.718161000000 | H | -4.296446000000 | 3.758429000000  | -1.472781000000 |
| C  | -0.731024000000 | -0.222702000000 | -2.957990000000 | H | -3.069516000000 | 4.199087000000  | -2.658499000000 |
| C  | 0.731025000000  | 0.224335000000  | -2.957456000000 | H | -4.145419000000 | 2.821793000000  | -2.970644000000 |
| H  | -1.366216000000 | 0.372715000000  | -3.619460000000 | C | -1.824625000000 | 3.157565000000  | -0.384530000000 |
| H  | 1.366207000000  | -0.370664000000 | -3.619709000000 | H | -2.525538000000 | 3.433184000000  | 0.412704000000  |
| H  | -0.832986000000 | -1.282344000000 | -3.235362000000 | H | -1.052977000000 | 2.511366000000  | 0.044919000000  |
| H  | 0.832987000000  | 1.284154000000  | -3.234548000000 | H | -1.351429000000 | 4.074498000000  | -0.756524000000 |
| N  | -1.081969000000 | -0.019622000000 | -1.553057000000 | C | 3.580808000000  | -3.347274000000 | -2.195676000000 |
| N  | 1.081979000000  | 0.020352000000  | -1.553053000000 | H | 4.146065000000  | -2.820128000000 | -2.971825000000 |
| C  | 2.417000000000  | 0.071788000000  | -1.061867000000 | H | 4.296766000000  | -3.757562000000 | -1.474427000000 |
| C  | 3.157783000000  | -1.122743000000 | -1.021833000000 | C | 3.070111000000  | -4.197607000000 | -2.660605000000 |
| C  | 2.944843000000  | 1.287373000000  | -0.600023000000 | C | 1.824796000000  | -3.157287000000 | -0.386324000000 |
| C  | 4.436576000000  | -1.083697000000 | -0.466531000000 | H | 2.525600000000  | -3.433251000000 | 0.410884000000  |
| C  | 4.231991000000  | 1.281655000000  | -0.058747000000 | H | 1.053030000000  | -2.511355000000 | 0.043320000000  |
| C  | 4.967347000000  | 0.106528000000  | 0.018307000000  | H | 1.351719000000  | -4.074070000000 | -0.758839000000 |
| H  | 5.027462000000  | -1.992442000000 | -0.405700000000 | C | 2.179739000000  | 3.405286000000  | 0.576569000000  |
| H  | 4.664065000000  | 2.207737000000  | 0.310158000000  | H | 1.890945000000  | 2.786330000000  | 1.429854000000  |
| H  | 5.962854000000  | 0.117675000000  | 0.452787000000  | H | 3.168887000000  | 3.832576000000  | 0.778742000000  |
| C  | -2.416987000000 | -0.071172000000 | -1.061888000000 | H | 1.470502000000  | 4.237386000000  | 0.501920000000  |
| C  | -3.157623000000 | 1.123418000000  | -1.021212000000 | C | 2.683063000000  | 3.418147000000  | -1.898051000000 |
| C  | -2.944969000000 | -1.286944000000 | -0.600687000000 | H | 2.633306000000  | 2.856599000000  | -2.837397000000 |
| C  | -4.436417000000 | 1.084234000000  | -0.465916000000 | H | 2.092753000000  | 4.334483000000  | -2.013295000000 |
| C  | -4.232107000000 | -1.281360000000 | -0.059391000000 | H | 3.729139000000  | 3.706631000000  | -1.739788000000 |

|                                              |                             |
|----------------------------------------------|-----------------------------|
| Zero-point correction=                       | 0.789523 (Hartree/Particle) |
| Thermal correction to Energy=                | 0.829121                    |
| Thermal correction to Enthalpy=              | 0.830066                    |
| Thermal correction to Gibbs Free Energy=     | 0.719834                    |
| Sum of electronic and zero-point Energies=   | -1643.046807                |
| Sum of electronic and thermal Energies=      | -1643.007209                |
| Sum of electronic and thermal Enthalpies=    | -1643.006265                |
| Sum of electronic and thermal Free Energies= | -1643.116496                |

CPCM (Benzene) M06L/def2TZVP E = -2981.96067892

### SIPr<sub>2</sub>-Ni (ωB97XD opt.)

|    |                 |                 |                 |   |                 |                 |                 |
|----|-----------------|-----------------|-----------------|---|-----------------|-----------------|-----------------|
| Ni | -0.033458000000 | 0.028262000000  | 0.001351000000  | C | -0.079502000000 | 1.863043000000  | 0.228699000000  |
| C  | 0.089712000000  | -1.830546000000 | 0.035155000000  | C | 0.590909000000  | 4.038494000000  | 0.916444000000  |
| C  | -0.443002000000 | -4.110370000000 | 0.472241000000  | C | -0.849026000000 | 4.101886000000  | 0.419052000000  |
| C  | 0.999079000000  | -4.033722000000 | -0.023105000000 | H | 1.288933000000  | 4.540224000000  | 0.231110000000  |
| N  | 1.152890000000  | -2.609465000000 | -0.319221000000 | H | -1.557687000000 | 4.266310000000  | 1.240914000000  |
| N  | -0.820056000000 | -2.698121000000 | 0.562496000000  | N | 0.842708000000  | 2.595642000000  | 0.933573000000  |
| H  | 1.178031000000  | -4.636062000000 | -0.921012000000 | N | -1.024063000000 | 2.766475000000  | -0.157590000000 |
| H  | -1.105792000000 | -4.631405000000 | -0.231753000000 | H | 0.718926000000  | 4.474009000000  | 1.911596000000  |
| C  | 2.315301000000  | -2.195000000000 | -1.032590000000 | H | -1.019236000000 | 4.880075000000  | -0.330163000000 |
| C  | 3.509743000000  | -1.897850000000 | -0.357626000000 | C | -2.214768000000 | 2.484297000000  | -0.889135000000 |
| C  | 2.253766000000  | -2.215161000000 | -2.441516000000 | C | -2.156406000000 | 2.434448000000  | -2.296197000000 |
| C  | 4.628554000000  | -1.571152000000 | -1.133064000000 | C | -3.423959000000 | 2.348720000000  | -0.194573000000 |
| C  | 3.399153000000  | -1.896403000000 | -3.167434000000 | C | -3.358385000000 | 2.313013000000  | -2.991406000000 |
| C  | 4.583820000000  | -1.574316000000 | -2.517761000000 | C | -4.602068000000 | 2.221429000000  | -0.934020000000 |
| H  | 5.557269000000  | -1.321217000000 | -0.624945000000 | C | -4.573392000000 | 2.223992000000  | -2.319852000000 |
| H  | 3.366320000000  | -1.894308000000 | -4.252916000000 | H | -3.352205000000 | 2.271197000000  | -4.075424000000 |
| H  | 5.470280000000  | -1.320918000000 | -3.092671000000 | H | -5.550907000000 | 2.111832000000  | -0.415577000000 |
| C  | -2.179086000000 | -2.436415000000 | 0.904325000000  | H | -5.497858000000 | 2.132088000000  | -2.883012000000 |
| C  | -3.152193000000 | -2.399169000000 | -0.109405000000 | C | 2.181034000000  | 2.157010000000  | 1.161486000000  |
| C  | -2.531828000000 | -2.387245000000 | 2.261942000000  | C | 3.077817000000  | 2.110905000000  | 0.079028000000  |
| C  | -4.494188000000 | -2.339648000000 | 0.268025000000  | C | 2.591743000000  | 1.874960000000  | 2.472946000000  |
| C  | -3.886683000000 | -2.347891000000 | 2.593784000000  | C | 4.388850000000  | 1.707417000000  | 0.329109000000  |
| C  | -4.862945000000 | -2.337179000000 | 1.607052000000  | C | 3.919707000000  | 1.499661000000  | 2.681529000000  |
| H  | -5.262525000000 | -2.299790000000 | -0.499282000000 | C | 4.809604000000  | 1.405360000000  | 1.619008000000  |
| H  | -4.180850000000 | -2.309246000000 | 3.639473000000  | H | 5.094087000000  | 1.641855000000  | -0.495168000000 |
| H  | -5.913639000000 | -2.303961000000 | 1.881102000000  | H | 4.262995000000  | 1.278567000000  | 3.688677000000  |
| C  | 3.749649000000  | -1.979623000000 | 1.146527000000  | H | 5.839125000000  | 1.106888000000  | 1.798173000000  |
| H  | 4.476150000000  | -1.185746000000 | 1.355431000000  | C | -3.471078000000 | 2.286205000000  | 1.322241000000  |
| C  | 4.438398000000  | -3.310955000000 | 1.494898000000  | C | 1.637692000000  | 2.024621000000  | 3.645543000000  |
| H  | 4.682449000000  | -3.344252000000 | 2.563044000000  | H | 0.634609000000  | 2.164738000000  | 3.230077000000  |
| H  | 3.789005000000  | -4.165505000000 | 1.273177000000  | C | 1.596526000000  | 0.779652000000  | 4.536388000000  |
| H  | 5.364868000000  | -3.444319000000 | 0.926521000000  | H | 2.569497000000  | 0.580566000000  | 5.001177000000  |
| C  | 2.572066000000  | -1.715297000000 | 2.085357000000  | H | 0.867011000000  | 0.918638000000  | 5.342046000000  |
| H  | 1.884604000000  | -2.565111000000 | 2.150960000000  | H | 1.304908000000  | -0.101577000000 | 3.960058000000  |
| H  | 2.966194000000  | -1.532699000000 | 3.091528000000  | C | 1.997527000000  | 3.268263000000  | 4.473025000000  |
| H  | 1.996370000000  | -0.838968000000 | 1.772878000000  | H | 2.983466000000  | 3.153707000000  | 4.939413000000  |
| C  | -1.478751000000 | -2.323326000000 | 3.352732000000  | H | 2.030058000000  | 4.169981000000  | 3.851721000000  |
| H  | -0.498317000000 | -2.412386000000 | 2.874569000000  | H | 1.263053000000  | 3.427013000000  | 5.271027000000  |
| H  | -1.622244000000 | -3.465468000000 | 4.365855000000  | C | -4.326543000000 | 3.409804000000  | 1.920521000000  |
| C  | -2.570095000000 | -3.401120000000 | 4.912919000000  | H | -4.284751000000 | 3.378783000000  | 3.127400000000  |
| H  | -1.589771000000 | -4.442706000000 | 3.871257000000  | H | -3.982707000000 | 4.396874000000  | 1.590741000000  |
| H  | -0.811512000000 | -3.427019000000 | 5.101981000000  | H | -5.377686000000 | 3.309165000000  | 1.626106000000  |
| C  | -1.523294000000 | -0.953166000000 | 4.042140000000  | C | -3.948108000000 | 0.905522000000  | 1.777108000000  |
| H  | -1.315750000000 | -0.155541000000 | 3.319774000000  | H | -4.972591000000 | 0.700848000000  | 1.446318000000  |
| H  | -2.506934000000 | -0.766877000000 | 4.489950000000  | H | -3.296340000000 | 0.129770000000  | 1.366467000000  |
| H  | -0.775213000000 | -0.902387000000 | 4.840156000000  | H | -3.924518000000 | 0.828656000000  | 2.870250000000  |
| C  | -2.780322000000 | -2.393637000000 | -1.581471000000 | H | -2.450669000000 | 2.394120000000  | 1.700227000000  |
| H  | -1.699322000000 | -2.538452000000 | -1.657591000000 | C | 2.667626000000  | 2.540057000000  | -1.320854000000 |
| C  | -3.456969000000 | -3.528566000000 | -2.359542000000 | C | -0.818051000000 | 2.462236000000  | -3.023174000000 |
| H  | -3.258712000000 | -4.503744000000 | -1.900491000000 | H | -0.130600000000 | 1.850820000000  | -2.426313000000 |
| H  | -4.544061000000 | -3.395944000000 | -2.406954000000 | C | -0.233001000000 | 3.877869000000  | -3.123654000000 |
| H  | -3.083021000000 | -3.552378000000 | -3.389778000000 | H | -0.071327000000 | 4.327380000000  | -2.140974000000 |
| C  | -3.091220000000 | -1.022456000000 | -2.189786000000 | H | 0.735796000000  | 3.849303000000  | -3.636637000000 |
| H  | -2.519175000000 | -0.243738000000 | -1.675601000000 | H | -0.901104000000 | 4.534192000000  | -3.694093000000 |
| H  | -2.828517000000 | -0.998330000000 | -3.253653000000 | C | -0.880602000000 | 1.839456000000  | -4.420315000000 |
| H  | -4.155546000000 | -0.777542000000 | -2.099505000000 | H | -1.430917000000 | 2.473951000000  | -5.125846000000 |
| C  | 0.962816000000  | -2.555433000000 | -3.168114000000 | H | 0.133921000000  | 1.717618000000  | -4.814802000000 |
| H  | 0.310444000000  | -3.082110000000 | -2.465085000000 | H | -1.355415000000 | 0.854210000000  | -4.400339000000 |
| C  | 1.177314000000  | -3.489079000000 | -4.365144000000 | C | 2.713931000000  | 1.380250000000  | -2.315151000000 |
| H  | 0.208888000000  | -3.821177000000 | -4.755736000000 | H | 3.733973000000  | 1.008405000000  | -2.453066000000 |
| H  | 1.702316000000  | -2.989802000000 | -5.187393000000 | H | 2.095037000000  | 0.550992000000  | -1.959425000000 |
| H  | 1.756022000000  | -4.375698000000 | -4.083693000000 | H | 2.334314000000  | 1.702730000000  | -3.293371000000 |
| C  | 0.231110000000  | -1.275856000000 | -3.586383000000 | C | 3.509483000000  | 3.729176000000  | -1.803047000000 |
| H  | -0.693218000000 | -1.521444000000 | -4.122909000000 | H | 3.135819000000  | 4.091122000000  | -2.768013000000 |
| H  | -0.029085000000 | -0.671658000000 | -2.708109000000 | H | 3.474327000000  | 4.559839000000  | -1.089031000000 |
| H  | 0.860190000000  | -0.668455000000 | -4.247883000000 | H | 4.561057000000  | 3.450324000000  | -1.937188000000 |
| H  | -0.536059000000 | -4.599199000000 | 1.447985000000  | H | 1.629573000000  | 2.873928000000  | -1.280773000000 |
| H  | 1.718330000000  | -4.347894000000 | 0.741916000000  |   |                 |                 |                 |



|                                              |                             |
|----------------------------------------------|-----------------------------|
| Zero-point correction=                       | 1.212174 (Hartree/Particle) |
| Thermal correction to Energy=                | 1.273877                    |
| Thermal correction to Enthalpy=              | 1.274821                    |
| Thermal correction to Gibbs Free Energy=     | 1.119714                    |
| Sum of electronic and zero-point Energies=   | -2491.622353                |
| Sum of electronic and thermal Energies=      | -2491.560650                |
| Sum of electronic and thermal Enthalpies=    | -2491.559705                |
| Sum of electronic and thermal Free Energies= | -2491.714812                |

CPCM (Benzene) M06L/def2TZVP E = -3831.37825232

### SIPr ( $\omega$ B97XD opt.)

|   |                 |                 |                 |   |                 |                 |                 |
|---|-----------------|-----------------|-----------------|---|-----------------|-----------------|-----------------|
| N | -1.070336000000 | -0.007179000000 | 0.579082000000  | H | -4.196169000000 | 2.922126000000  | 1.917146000000  |
| N | 1.070325000000  | 0.007510000000  | 0.579073000000  | H | -4.400328000000 | 3.661690000000  | 0.317627000000  |
| C | 0.000007000000  | -0.000101000000 | -0.244329000000 | C | 2.421040000000  | 0.145828000000  | 0.142229000000  |
| C | -0.746040000000 | -0.160273000000 | 2.008239000000  | C | 3.242606000000  | -0.994645000000 | 0.148371000000  |
| H | -1.339391000000 | 0.517748000000  | 2.628106000000  | C | 4.574477000000  | -0.847150000000 | -0.234787000000 |
| C | 0.746003000000  | 0.161151000000  | 2.008185000000  | H | 5.234604000000  | -1.708700000000 | -0.242517000000 |
| H | 0.953403000000  | 1.191445000000  | 2.329527000000  | C | 5.070257000000  | 0.394717000000  | -0.618197000000 |
| C | -2.421005000000 | -0.145770000000 | 0.142154000000  | H | 6.110038000000  | 0.492844000000  | -0.916944000000 |
| C | -2.899445000000 | -1.405124000000 | -0.245376000000 | C | 4.238708000000  | 1.505577000000  | -0.631292000000 |
| C | -4.238309000000 | -1.505903000000 | -0.631541000000 | H | 4.634911000000  | 2.465285000000  | -0.950751000000 |
| H | -4.634258000000 | -2.465692000000 | -0.951080000000 | C | 2.899785000000  | 1.405087000000  | -0.245274000000 |
| C | -5.070109000000 | -0.395234000000 | -0.618484000000 | C | 2.650411000000  | -2.356499000000 | 0.477243000000  |
| H | -6.109844000000 | -0.493591000000 | -0.917316000000 | H | 1.864927000000  | -2.207702000000 | 1.226951000000  |
| C | -4.574630000000 | 0.846737000000  | -0.235012000000 | C | 1.970532000000  | -2.934442000000 | -0.773997000000 |
| H | -5.234958000000 | 1.708130000000  | -0.242739000000 | H | 1.226724000000  | -2.235131000000 | -1.167893000000 |
| C | -3.242819000000 | 0.994529000000  | 0.148250000000  | H | 1.470425000000  | -3.882197000000 | -0.539799000000 |
| C | -1.980273000000 | -2.612858000000 | -0.326021000000 | C | 2.712145000000  | -3.123008000000 | -1.559190000000 |
| H | -1.065855000000 | -2.382860000000 | 0.230615000000  | C | 3.659084000000  | -3.348201000000 | 1.062283000000  |
| C | -1.568087000000 | -2.846180000000 | -1.786441000000 | H | 4.399612000000  | -3.661963000000 | 0.317674000000  |
| H | -2.445398000000 | -3.064515000000 | -2.407203000000 | H | 3.139521000000  | -4.251682000000 | 1.399195000000  |
| H | -0.874943000000 | -3.691700000000 | -1.863152000000 | H | 4.195447000000  | -2.922457000000 | 1.917214000000  |
| H | -1.074913000000 | -1.953352000000 | -2.183179000000 | C | 1.980782000000  | 2.612943000000  | -0.326079000000 |
| C | -2.590174000000 | -3.873872000000 | 0.295758000000  | H | 1.066479000000  | 2.383266000000  | 0.230874000000  |
| H | -2.913816000000 | -3.694306000000 | 1.326760000000  | C | 1.568256000000  | 2.845798000000  | -1.786504000000 |
| H | -1.850181000000 | -4.681957000000 | 0.303960000000  | H | 2.445445000000  | 3.063980000000  | -2.407491000000 |
| H | -3.456435000000 | -4.232530000000 | -0.271604000000 | H | 0.875064000000  | 3.691274000000  | -1.863332000000 |
| C | -2.650923000000 | 2.356504000000  | 0.477223000000  | H | 1.075036000000  | 1.952850000000  | -2.182904000000 |
| H | -1.865451000000 | 2.207828000000  | 1.226970000000  | C | 2.590940000000  | 3.874144000000  | 0.295033000000  |
| C | -1.971107000000 | 2.934719000000  | -0.773909000000 | H | 2.914926000000  | 3.694974000000  | 1.325995000000  |
| H | -1.226994000000 | 2.235719000000  | -1.167780000000 | H | 1.850964000000  | 4.682245000000  | 0.303166000000  |
| H | -1.471387000000 | 3.882648000000  | -0.539595000000 | H | 3.457004000000  | 4.232589000000  | -0.272765000000 |
| H | -2.712692000000 | 3.123058000000  | -1.559186000000 | H | 1.339346000000  | -0.516648000000 | 2.628303000000  |
| C | -3.659812000000 | 3.347998000000  | 1.062277000000  | H | -0.953437000000 | -1.190454000000 | 2.329968000000  |
| H | -3.140430000000 | 4.251549000000  | 1.399278000000  |   |                 |                 |                 |

|                                              |                             |
|----------------------------------------------|-----------------------------|
| Zero-point correction=                       | 0.603083 (Hartree/Particle) |
| Thermal correction to Energy=                | 0.632861                    |
| Thermal correction to Enthalpy=              | 0.633805                    |
| Thermal correction to Gibbs Free Energy=     | 0.543671                    |
| Sum of electronic and zero-point Energies=   | -1160.292740                |
| Sum of electronic and thermal Energies=      | -1160.262962                |
| Sum of electronic and thermal Enthalpies=    | -1160.262018                |
| Sum of electronic and thermal Free Energies= | -1160.352152                |

CPCM (Benzene) PBE0-D3/def2TZVP E = -1161.49075582

### 1,5-cyclooctadiene ( $\omega$ B97XD opt.)

|   |                 |                 |                 |
|---|-----------------|-----------------|-----------------|
| C | -1.095939000000 | -1.084968000000 | 0.669802000000  |
| C | 1.915923000000  | -0.020769000000 | -0.016612000000 |
| C | 0.041510000000  | 1.693905000000  | -0.224391000000 |
| C | -1.915920000000 | 0.020744000000  | -0.016623000000 |
| C | -1.185190000000 | 1.246036000000  | -0.501332000000 |
| H | -1.795667000000 | -1.875273000000 | 0.965733000000  |
| H | -2.718759000000 | 0.340001000000  | 0.664646000000  |
| H | -0.665169000000 | -0.711843000000 | 1.601228000000  |
| H | 0.345665000000  | 2.611439000000  | -0.727501000000 |
| H | -2.429314000000 | -0.419520000000 | -0.882780000000 |
| C | -0.041521000000 | -1.693898000000 | -0.224385000000 |
| H | -0.345717000000 | -2.611413000000 | -0.727504000000 |
| C | 1.185173000000  | -1.246036000000 | -0.501357000000 |
| H | 1.777589000000  | -1.853882000000 | -1.185968000000 |
| H | 2.429385000000  | 0.419462000000  | -0.882743000000 |
| H | 2.718703000000  | -0.340047000000 | 0.664718000000  |
| H | -1.777634000000 | 1.853897000000  | -1.185906000000 |
| C | 1.095961000000  | 1.084984000000  | 0.669766000000  |
| H | 0.665224000000  | 0.711911000000  | 1.601229000000  |
| H | 1.795713000000  | 1.875289000000  | 0.965641000000  |

|                                              |                             |
|----------------------------------------------|-----------------------------|
| Zero-point correction=                       | 0.183361 (Hartree/Particle) |
| Thermal correction to Energy=                | 0.190701                    |
| Thermal correction to Enthalpy=              | 0.191646                    |
| Thermal correction to Gibbs Free Energy=     | 0.151915                    |
| Sum of electronic and zero-point Energies=   | -311.745607                 |
| Sum of electronic and thermal Energies=      | -311.738266                 |
| Sum of electronic and thermal Enthalpies=    | -311.737322                 |
| Sum of electronic and thermal Free Energies= | -311.777053                 |

CPCM (Benzene) M06L/def2TZVP E = -312.0931141

### PhSeCF<sub>3</sub> (ωB97XD opt.)

|    |                 |                 |                 |
|----|-----------------|-----------------|-----------------|
| C  | 0.911163000000  | -0.402147000000 | -0.101095000000 |
| C  | 1.535562000000  | 0.179089000000  | -1.204670000000 |
| C  | 1.592108000000  | -0.520259000000 | 1.110048000000  |
| H  | 0.998723000000  | 0.267210000000  | -2.143218000000 |
| H  | 1.098042000000  | -0.971297000000 | 1.964096000000  |
| C  | 2.840352000000  | 0.650070000000  | -1.091409000000 |
| C  | 2.898263000000  | -0.051369000000 | 1.217125000000  |
| H  | 3.323755000000  | 1.106806000000  | -1.949528000000 |
| H  | 3.426608000000  | -0.142142000000 | 2.161163000000  |
| C  | 3.521379000000  | 0.533909000000  | 0.117847000000  |
| H  | 4.539639000000  | 0.901198000000  | 0.204143000000  |
| Se | -0.879965000000 | -1.059643000000 | -0.251518000000 |
| C  | -1.732401000000 | 0.649824000000  | 0.162677000000  |
| F  | -1.424666000000 | 1.599250000000  | -0.726073000000 |
| F  | -3.057690000000 | 0.470764000000  | 0.140830000000  |
| F  | -1.391701000000 | 1.111248000000  | 1.368780000000  |

|                                              |                             |
|----------------------------------------------|-----------------------------|
| Zero-point correction=                       | 0.107229 (Hartree/Particle) |
| Thermal correction to Energy=                | 0.117097                    |
| Thermal correction to Enthalpy=              | 0.118041                    |
| Thermal correction to Gibbs Free Energy=     | 0.069072                    |
| Sum of electronic and zero-point Energies=   | -2967.935241                |
| Sum of electronic and thermal Energies=      | -2967.925374                |
| Sum of electronic and thermal Enthalpies=    | -2967.924430                |
| Sum of electronic and thermal Free Energies= | -2967.973399                |

CPCM (Benzene) M06L/def2TZVP E = -2970.89854866

### PhI (ωB97XD opt.)

|   |                |                 |                 |
|---|----------------|-----------------|-----------------|
| C | 0.000000000000 | 0.000000000000  | -0.574224000000 |
| C | 0.000000000000 | 1.212529000000  | -1.255361000000 |
| C | 0.000000000000 | -1.212529000000 | -1.255361000000 |
| H | 0.000000000000 | 2.152445000000  | -0.714557000000 |
| H | 0.000000000000 | -2.152445000000 | -0.714557000000 |
| C | 0.000000000000 | 1.204240000000  | -2.648723000000 |
| C | 0.000000000000 | -1.204240000000 | -2.648723000000 |
| H | 0.000000000000 | 2.147879000000  | -3.185957000000 |
| H | 0.000000000000 | -2.147879000000 | -3.185957000000 |
| C | 0.000000000000 | 0.000000000000  | -3.346460000000 |
| H | 0.000000000000 | 0.000000000000  | -4.432127000000 |
| I | 0.000000000000 | 0.000000000000  | 1.558609000000  |

|                                              |                             |
|----------------------------------------------|-----------------------------|
| Zero-point correction=                       | 0.091513 (Hartree/Particle) |
| Thermal correction to Energy=                | 0.097310                    |
| Thermal correction to Enthalpy=              | 0.098254                    |
| Thermal correction to Gibbs Free Energy=     | 0.060505                    |
| Sum of electronic and zero-point Energies=   | -242.888371                 |
| Sum of electronic and thermal Energies=      | -242.882573                 |
| Sum of electronic and thermal Enthalpies=    | -242.881629                 |
| Sum of electronic and thermal Free Energies= | -242.919379                 |

CPCM (Benzene) M06L/def2TZVP E = -529.570349595

### PhBr (ωB97XD opt.)

|   |                |                 |                 |
|---|----------------|-----------------|-----------------|
| C | 0.000000000000 | 0.000000000000  | -0.097553000000 |
| C | 0.000000000000 | 1.212437000000  | -0.778143000000 |
| C | 0.000000000000 | -1.212437000000 | -0.778143000000 |
| H | 0.000000000000 | 2.146853000000  | -0.228040000000 |
| H | 0.000000000000 | -2.146853000000 | -0.228040000000 |
| C | 0.000000000000 | 1.204632000000  | -2.170589000000 |
| C | 0.000000000000 | -1.204632000000 | -2.170589000000 |
| H | 0.000000000000 | 2.147876000000  | -2.708280000000 |

|    |                |                 |                 |
|----|----------------|-----------------|-----------------|
| H  | 0.000000000000 | -2.147876000000 | -2.708280000000 |
| C  | 0.000000000000 | 0.000000000000  | -2.868384000000 |
| H  | 0.000000000000 | 0.000000000000  | -3.953939000000 |
| Br | 0.000000000000 | 0.000000000000  | 1.800200000000  |

|                                              |                             |
|----------------------------------------------|-----------------------------|
| Zero-point correction=                       | 0.092044 (Hartree/Particle) |
| Thermal correction to Energy=                | 0.097668                    |
| Thermal correction to Enthalpy=              | 0.098613                    |
| Thermal correction to Gibbs Free Energy=     | 0.061883                    |
| Sum of electronic and zero-point Energies=   | -2802.899628                |
| Sum of electronic and thermal Energies=      | -2802.894003                |
| Sum of electronic and thermal Enthalpies=    | -2802.893059                |
| Sum of electronic and thermal Free Energies= | -2802.929789                |

CPCM (Benzene) M06L/def2TZVP E = -2805.75805909

### PhCl (ωB97XD opt.)

|    |                 |                 |                 |
|----|-----------------|-----------------|-----------------|
| C  | -0.503970000000 | 0.000000000000  | 0.000021000000  |
| C  | 0.176144000000  | -1.213011000000 | -0.000050000000 |
| H  | -0.376197000000 | -2.146371000000 | 0.000019000000  |
| C  | 1.568464000000  | -1.204601000000 | -0.000069000000 |
| H  | 2.106349000000  | -2.147717000000 | -0.000090000000 |
| C  | 2.266578000000  | -0.000002000000 | -0.000101000000 |
| C  | 1.568463000000  | 1.204601000000  | -0.000066000000 |
| H  | 2.106354000000  | 2.147714000000  | -0.000086000000 |
| C  | 0.176149000000  | 1.213013000000  | -0.000050000000 |
| H  | -0.376199000000 | 2.146370000000  | 0.000022000000  |
| H  | 3.352102000000  | -0.000001000000 | -0.000153000000 |
| Cl | -2.254316000000 | 0.000000000000  | 0.000096000000  |

|                                              |                             |
|----------------------------------------------|-----------------------------|
| Zero-point correction=                       | 0.092363 (Hartree/Particle) |
| Thermal correction to Energy=                | 0.097804                    |
| Thermal correction to Enthalpy=              | 0.098748                    |
| Thermal correction to Gibbs Free Energy=     | 0.062620                    |
| Sum of electronic and zero-point Energies=   | -691.647479                 |
| Sum of electronic and thermal Energies=      | -691.642038                 |
| Sum of electronic and thermal Enthalpies=    | -691.641094                 |
| Sum of electronic and thermal Free Energies= | -691.677223                 |

CPCM (Benzene) M06L/def2TZVP E = -691.903835079

### TS-OA-Ni(0)-PhSeCF<sub>3</sub> (ωB97XD opt.)

|    |                 |                 |                 |   |                 |                 |                 |
|----|-----------------|-----------------|-----------------|---|-----------------|-----------------|-----------------|
| Ni | -0.166619000000 | 0.566335000000  | -0.396591000000 | H | 3.186730000000  | -2.877678000000 | -3.962425000000 |
| C  | -0.209339000000 | -1.229407000000 | -0.009866000000 | H | 2.157620000000  | -3.858480000000 | -2.907815000000 |
| C  | 0.406097000000  | -3.508653000000 | 0.041963000000  | H | 1.482212000000  | -3.130535000000 | -4.380206000000 |
| C  | -1.022855000000 | -3.365911000000 | 0.569748000000  | C | 1.790618000000  | -0.470887000000 | -3.662719000000 |
| N  | -1.321048000000 | -1.973981000000 | 0.233727000000  | H | 1.494690000000  | 0.417390000000  | -3.095993000000 |
| N  | 0.823080000000  | -2.109524000000 | -0.042974000000 | H | 2.777514000000  | -0.290104000000 | -4.104778000000 |
| H  | -1.080300000000 | -1.425103000000 | 1.658007000000  | H | 1.075564000000  | -0.598424000000 | -4.483045000000 |
| H  | 1.058684000000  | -4.077981000000 | 0.710551000000  | C | 2.436010000000  | -1.805590000000 | 2.287864000000  |
| C  | -2.594257000000 | -1.395975000000 | 0.513065000000  | H | 1.487530000000  | -2.343265000000 | 2.192452000000  |
| C  | -3.604540000000 | -1.425103000000 | -0.463421000000 | C | 3.344403000000  | -2.640652000000 | 3.196398000000  |
| C  | -2.803976000000 | -0.809858000000 | 1.775451000000  | H | 3.588636000000  | -3.605714000000 | 2.739343000000  |
| C  | -4.838519000000 | -0.856055000000 | -0.135857000000 | H | 4.285556000000  | -2.124823000000 | 3.417772000000  |
| C  | -4.054941000000 | -0.259082000000 | 2.052456000000  | H | 2.845776000000  | -2.829488000000 | 4.153469000000  |
| C  | -5.069105000000 | -0.281915000000 | 1.105925000000  | C | 2.112908000000  | -0.444202000000 | 2.915306000000  |
| H  | -5.631404000000 | -0.861047000000 | -0.880114000000 | H | 1.459319000000  | 0.142851000000  | 2.261113000000  |
| H  | -4.234178000000 | 0.202900000000  | 3.019591000000  | H | 1.614081000000  | -0.577573000000 | 3.883145000000  |
| H  | -6.036286000000 | 0.158150000000  | 1.330570000000  | C | 3.028602000000  | 0.133848000000  | 3.078789000000  |
| C  | 2.184017000000  | -1.742727000000 | -0.242805000000 | C | -1.710681000000 | -0.739147000000 | 2.831303000000  |
| C  | 3.004392000000  | -1.618912000000 | 0.890570000000  | H | -0.803290000000 | -1.190832000000 | 2.421383000000  |
| C  | 2.672383000000  | -1.536971000000 | -1.541553000000 | C | -2.091934000000 | -1.525634000000 | 4.092108000000  |
| C  | 4.339978000000  | -1.268359000000 | 0.698774000000  | H | -1.269502000000 | -1.505381000000 | 4.816423000000  |
| C  | 4.016899000000  | -1.188958000000 | -1.687246000000 | H | -2.975736000000 | -1.098191000000 | 4.579562000000  |
| C  | 4.844137000000  | -1.055398000000 | -0.579138000000 | H | -2.315471000000 | -2.572201000000 | 3.856438000000  |
| H  | 4.994930000000  | -1.151568000000 | 1.557500000000  | C | -1.364581000000 | 0.718351000000  | 3.158909000000  |
| H  | 4.424393000000  | -1.027567000000 | -2.681761000000 | H | -0.539014000000 | 0.765650000000  | 3.038822000000  |
| H  | 5.888682000000  | -0.787655000000 | -0.712433000000 | H | -1.056354000000 | 1.243441000000  | 2.249361000000  |
| C  | -3.498916000000 | -2.055229000000 | -1.851899000000 | C | -2.221832000000 | 1.247744000000  | 3.590876000000  |
| H  | -4.203368000000 | -1.426893000000 | -2.469144000000 | C | 1.209916000000  | 2.452064000000  | 0.038822000000  |
| C  | -4.018533000000 | -3.502025000000 | -1.829105000000 | C | 0.918142000000  | 3.031875000000  | 1.278436000000  |
| H  | -4.050254000000 | -3.914913000000 | -2.843927000000 | C | 2.515051000000  | 2.010756000000  | -0.227859000000 |
| H  | -3.367588000000 | -4.146893000000 | -1.228135000000 | C | 1.921334000000  | 3.161952000000  | 0.522117000000  |
| H  | -5.025395000000 | -3.557109000000 | -1.402461000000 | H | -0.082185000000 | 3.374299000000  | 1.509339000000  |
| C  | -2.147851000000 | -1.973557000000 | -2.573431000000 | C | 3.503066000000  | 2.142601000000  | 0.737891000000  |
| H  | -1.442386000000 | -2.727368000000 | -2.210711000000 | H | 2.753625000000  | 1.548796000000  | -1.180967000000 |
| H  | -2.303489000000 | -2.157968000000 | -3.642971000000 | C | 3.215918000000  | 2.729693000000  | 1.968927000000  |
| H  | -1.679118000000 | -0.991849000000 | -2.450750000000 | H | 1.680673000000  | 3.609439000000  | 3.194688000000  |
| C  | 1.784396000000  | -1.709559000000 | -2.761181000000 | H | 4.502140000000  | 1.778045000000  | 0.522117000000  |
| H  | 0.758236000000  | -1.836113000000 | -2.408008000000 | H | 3.993899000000  | 2.838118000000  | 2.718528000000  |
| C  | 2.175821000000  | -2.968811000000 | -3.547369000000 | H | 0.436828000000  | -3.977662000000 | -0.951566000000 |

|    |                 |                 |                 |   |                 |                |                 |
|----|-----------------|-----------------|-----------------|---|-----------------|----------------|-----------------|
| H  | -1.724081000000 | -4.053210000000 | 0.091453000000  | F | -0.884740000000 | 4.924383000000 | -0.504716000000 |
| Se | -0.039059000000 | 2.454481000000  | -1.479080000000 | F | -2.065057000000 | 3.295648000000 | 0.274049000000  |
| C  | -1.405963000000 | 3.731527000000  | -0.806701000000 | F | -2.296041000000 | 3.900350000000 | -1.790025000000 |

|                                              |                             |
|----------------------------------------------|-----------------------------|
| Zero-point correction=                       | 0.713410 (Hartree/Particle) |
| Thermal correction to Energy=                | 0.755603                    |
| Thermal correction to Enthalpy=              | 0.756547                    |
| Thermal correction to Gibbs Free Energy=     | 0.638549                    |
| Sum of electronic and zero-point Energies=   | -4299.209415                |
| Sum of electronic and thermal Energies=      | -4299.167222                |
| Sum of electronic and thermal Enthalpies=    | -4299.166278                |
| Sum of electronic and thermal Free Energies= | -4299.284276                |

CPCM (Benzene) M06L/def2TZVP E = -5640.7383097

### SIPr-Ni-Ph-SeCF<sub>3</sub> (ωB97XD opt.)

|    |                 |                 |                 |    |                 |                 |                 |
|----|-----------------|-----------------|-----------------|----|-----------------|-----------------|-----------------|
| Ni | 0.485273000000  | 0.553929000000  | -0.224494000000 | H  | 0.058291000000  | 0.191134000000  | 4.246280000000  |
| N  | 0.511435000000  | -2.215229000000 | 0.290786000000  | H  | 2.012227000000  | -2.187506000000 | 4.780932000000  |
| N  | -1.542234000000 | -1.734551000000 | -0.194187000000 | H  | 0.248289000000  | -2.260172000000 | 4.898976000000  |
| C  | 2.888401000000  | -2.104893000000 | -0.225225000000 | H  | 1.120254000000  | -3.400761000000 | 3.852156000000  |
| C  | 4.188577000000  | -1.829193000000 | 0.194284000000  | H  | -0.231966000000 | -3.716727000000 | 1.573003000000  |
| C  | 4.447333000000  | -1.444570000000 | 1.504668000000  | H  | -2.379868000000 | -3.552637000000 | 0.506106000000  |
| C  | 3.409128000000  | -1.313173000000 | 2.416885000000  | H  | -5.583804000000 | 0.286297000000  | 0.519059000000  |
| C  | 2.087597000000  | -1.561990000000 | 2.040790000000  | H  | -5.763550000000 | 0.964209000000  | -1.845770000000 |
| C  | 1.854287000000  | -1.965265000000 | 0.716170000000  | H  | -3.981105000000 | 0.388705000000  | -3.447006000000 |
| C  | 2.585557000000  | -2.478098000000 | -1.668478000000 | H  | -2.603989000000 | -1.557944000000 | 1.892539000000  |
| C  | 2.314610000000  | -1.218341000000 | -2.505741000000 | H  | -3.529539000000 | -0.223155000000 | 3.721659000000  |
| C  | 3.685326000000  | -3.328759000000 | -2.313304000000 | H  | -4.651062000000 | 0.592176000000  | 2.622545000000  |
| C  | 0.962637000000  | -1.372973000000 | 3.046494000000  | H  | -2.904085000000 | 0.839700000000  | 2.436721000000  |
| C  | 0.893232000000  | 0.076402000000  | 3.546304000000  | H  | -4.597608000000 | -3.020546000000 | 1.412666000000  |
| C  | 1.093652000000  | -2.365213000000 | 4.210295000000  | H  | -4.540234000000 | -2.500658000000 | 3.111247000000  |
| C  | -0.173623000000 | -3.493619000000 | 0.499696000000  | H  | -5.663190000000 | -1.729424000000 | 1.979186000000  |
| C  | -1.549842000000 | -3.201217000000 | -0.111639000000 | H  | -0.884749000000 | -1.525847000000 | -2.488669000000 |
| C  | -0.324330000000 | -1.210421000000 | -0.026787000000 | H  | -0.685437000000 | 0.941932000000  | -2.818119000000 |
| C  | -2.683267000000 | -1.006526000000 | -0.650910000000 | H  | -0.203915000000 | 0.011317000000  | -4.254092000000 |
| C  | -3.685719000000 | -0.690429000000 | 0.279006000000  | C  | -2.220381000000 | -1.915797000000 | -4.105633000000 |
| C  | -4.795467000000 | 0.018475000000  | -0.178575000000 | H  | -3.003474000000 | -1.424758000000 | -4.694332000000 |
| C  | -4.896962000000 | 0.402936000000  | -1.509311000000 | H  | -1.416599000000 | -2.202472000000 | -4.793006000000 |
| C  | -3.891639000000 | 0.077493000000  | -2.409976000000 | H  | -2.649421000000 | -2.828430000000 | -3.677015000000 |
| C  | -2.765210000000 | -0.637517000000 | -2.002271000000 | C  | 1.747366000000  | 1.812686000000  | -0.617838000000 |
| C  | -3.588349000000 | -1.102589000000 | 1.739189000000  | C  | 2.922804000000  | 1.561756000000  | 0.103031000000  |
| C  | -3.672649000000 | 0.102207000000  | 2.684833000000  | C  | 1.835899000000  | 2.493107000000  | -1.838709000000 |
| C  | -4.656778000000 | -2.152071000000 | 2.079002000000  | C  | 4.167721000000  | 1.912767000000  | -0.422189000000 |
| C  | -1.681359000000 | -0.985532000000 | -3.010377000000 | C  | 3.076582000000  | 2.852075000000  | -2.358116000000 |
| C  | -1.048511000000 | 0.277480000000  | -3.608431000000 | C  | 4.245371000000  | 2.552772000000  | -1.655534000000 |
| H  | 5.010144000000  | -1.906459000000 | -0.510055000000 | H  | 2.878416000000  | 1.076776000000  | 1.076576000000  |
| H  | 5.467544000000  | -1.236024000000 | 1.813209000000  | H  | 0.929380000000  | 2.732053000000  | -2.388304000000 |
| H  | 3.625000000000  | -0.998450000000 | 3.434006000000  | H  | 5.072880000000  | 1.693659000000  | 0.139097000000  |
| H  | 1.665949000000  | -3.075792000000 | -1.671351000000 | H  | 3.136850000000  | 3.365083000000  | -3.314693000000 |
| H  | 1.423272000000  | -0.685302000000 | -2.154168000000 | H  | 5.212102000000  | 2.833390000000  | -2.064904000000 |
| H  | 2.147433000000  | -1.482366000000 | -3.556589000000 | Se | -1.171803000000 | 1.942889000000  | 0.321950000000  |
| H  | 3.153350000000  | -0.515572000000 | -2.448935000000 | H  | -1.771600000000 | 0.837580000000  | -4.212362000000 |
| H  | 3.952474000000  | -4.185900000000 | -1.686082000000 | C  | -0.345904000000 | 3.579410000000  | 0.972156000000  |
| H  | 3.341853000000  | -3.706433000000 | -3.282118000000 | F  | 0.634620000000  | 3.363322000000  | 1.869471000000  |
| H  | 4.594195000000  | -2.745833000000 | -2.498720000000 | F  | 0.173097000000  | 4.362827000000  | 0.015068000000  |
| H  | 0.011304000000  | -1.573949000000 | 2.544033000000  | F  | -1.290367000000 | 4.308969000000  | 1.598898000000  |
| H  | 0.733844000000  | 0.776330000000  | 2.720482000000  | H  | 0.355790000000  | -4.310992000000 | 0.003070000000  |
| H  | 1.811685000000  | 0.363926000000  | 4.071018000000  | H  | -1.660739000000 | -3.624258000000 | -1.118396000000 |

|                                              |                             |
|----------------------------------------------|-----------------------------|
| Zero-point correction=                       | 0.712440 (Hartree/Particle) |
| Thermal correction to Energy=                | 0.755990                    |
| Thermal correction to Enthalpy=              | 0.756934                    |
| Thermal correction to Gibbs Free Energy=     | 0.633787                    |
| Sum of electronic and zero-point Energies=   | -4299.249941                |
| Sum of electronic and thermal Energies=      | -4299.206391                |
| Sum of electronic and thermal Enthalpies=    | -4299.205446                |
| Sum of electronic and thermal Free Energies= | -4299.328594                |

CPCM (Benzene) M06L/def2TZVP E = -5640.77292940

### TS-OA-Ni(0)-PhI (ωB97XD opt.)

|    |                |                 |                 |   |                 |                 |                 |
|----|----------------|-----------------|-----------------|---|-----------------|-----------------|-----------------|
| Ni | 0.123547000000 | -0.655134000000 | -0.639738000000 | C | 4.047657000000  | 0.029889000000  | -0.433772000000 |
| C  | 0.748710000000 | 0.807584000000  | 0.201893000000  | C | 3.012910000000  | -0.921947000000 | 1.578250000000  |
| C  | 0.916030000000 | 3.030370000000  | 0.988662000000  | C | 5.016205000000  | -0.976111000000 | -0.364247000000 |
| C  | 2.215662000000 | 2.292135000000  | 1.308039000000  | C | 4.003969000000  | -1.902177000000 | 1.603728000000  |
| N  | 2.048396000000 | 1.060540000000  | 0.538956000000  | C | 5.002983000000  | -1.931858000000 | 0.640920000000  |
| N  | 0.057722000000 | 1.927437000000  | 0.560303000000  | H | 5.794098000000  | -1.007029000000 | -1.123733000000 |
| H  | 2.307704000000 | 2.066638000000  | 2.381187000000  | H | 3.989353000000  | -2.658114000000 | 2.384248000000  |
| H  | 0.493263000000 | 3.554060000000  | 1.851293000000  | H | 5.766369000000  | -2.703919000000 | 0.668644000000  |
| C  | 3.048365000000 | 0.044115000000  | 0.553944000000  | C | -1.331213000000 | 2.127665000000  | 0.318506000000  |

|   |                 |                |                 |   |                 |                 |                 |
|---|-----------------|----------------|-----------------|---|-----------------|-----------------|-----------------|
| C | -2.214675000000 | 1.993250000000 | 1.403680000000  | H | -2.475506000000 | 3.288366000000  | 3.837985000000  |
| C | -1.778773000000 | 2.486438000000 | -0.961937000000 | H | -3.466438000000 | 1.829733000000  | 4.026224000000  |
| C | -3.571161000000 | 2.225800000000 | 1.180121000000  | H | -1.928989000000 | 1.956666000000  | 4.877471000000  |
| C | -3.147505000000 | 2.698942000000 | -1.142633000000 | C | -1.735108000000 | 0.018566000000  | 2.864999000000  |
| C | -4.035952000000 | 2.572978000000 | -0.083099000000 | H | -1.212550000000 | -0.444169000000 | 2.020460000000  |
| H | -4.278686000000 | 2.120306000000 | 1.997420000000  | H | -1.261298000000 | -0.315311000000 | 3.796394000000  |
| H | -3.520183000000 | 2.979766000000 | -2.124335000000 | H | -2.768488000000 | -0.342912000000 | 2.856039000000  |
| H | -5.096385000000 | 2.750834000000 | -0.240478000000 | C | 1.927215000000  | -0.939129000000 | 2.644135000000  |
| C | 4.204045000000  | 1.041166000000 | -1.568457000000 | H | 1.236580000000  | -0.114606000000 | 2.449610000000  |
| H | 4.703329000000  | 0.483974000000 | -2.372004000000 | C | 2.513379000000  | -0.731962000000 | 4.047053000000  |
| C | 5.167902000000  | 2.166624000000 | -1.158164000000 | H | 1.710776000000  | -0.690631000000 | 4.792514000000  |
| H | 5.368330000000  | 2.829645000000 | -2.007747000000 | H | 3.186956000000  | -1.549984000000 | 4.327716000000  |
| H | 4.742823000000  | 2.776370000000 | -0.353133000000 | H | 3.083308000000  | 0.202233000000  | 4.105203000000  |
| H | 6.121751000000  | 1.763474000000 | -0.802238000000 | C | 1.100081000000  | -2.228610000000 | 2.566049000000  |
| C | 2.925406000000  | 1.620310000000 | -2.186181000000 | H | 0.295053000000  | -2.211844000000 | 3.309077000000  |
| H | 2.497409000000  | 2.413042000000 | -1.565674000000 | H | 0.649274000000  | -2.323092000000 | 1.571272000000  |
| H | 3.164751000000  | 2.058306000000 | -3.162557000000 | H | 1.716973000000  | -3.115209000000 | 2.754568000000  |
| H | 2.155650000000  | 0.853707000000 | -2.322593000000 | I | -0.739429000000 | -2.493962000000 | -2.012339000000 |
| C | -0.816226000000 | 2.673069000000 | -2.121134000000 | C | -2.247276000000 | -2.129807000000 | -0.463981000000 |
| H | 0.173348000000  | 2.356560000000 | -1.784835000000 | C | -2.330165000000 | -3.039145000000 | 0.585112000000  |
| C | -0.729993000000 | 4.150510000000 | -2.528467000000 | C | -3.182543000000 | -1.113979000000 | -0.630540000000 |
| H | -1.690180000000 | 4.514893000000 | -2.913156000000 | C | -3.395446000000 | -2.939522000000 | 1.477358000000  |
| H | -0.452014000000 | 4.781892000000 | -1.676888000000 | H | -1.581643000000 | -3.814471000000 | 0.706931000000  |
| H | 0.021044000000  | 4.286209000000 | -3.315047000000 | C | -4.240609000000 | -1.031181000000 | 0.271667000000  |
| C | -1.177237000000 | 1.784448000000 | -3.316045000000 | H | -3.086594000000 | -0.386933000000 | -1.429445000000 |
| H | -1.198597000000 | 0.732052000000 | -3.014198000000 | C | -4.356819000000 | -1.946085000000 | 1.315006000000  |
| H | -2.152585000000 | 2.047968000000 | -3.742593000000 | H | -3.471075000000 | -3.648418000000 | 2.296531000000  |
| H | -0.426275000000 | 1.893079000000 | -4.106823000000 | H | -4.969500000000 | -0.236093000000 | 0.155546000000  |
| C | -1.699396000000 | 1.549276000000 | 2.763216000000  | H | -5.189085000000 | -1.877263000000 | 2.009028000000  |
| H | -0.648727000000 | 1.848572000000 | 2.834877000000  | H | 1.042923000000  | 3.757033000000  | 0.172871000000  |
| C | -2.437905000000 | 2.198156000000 | 3.937944000000  | H | 3.106232000000  | 2.843224000000  | 0.996473000000  |

Zero-point correction=

Thermal correction to Energy=  
Thermal correction to Enthalpy=  
Thermal correction to Gibbs Free Energy=  
Sum of electronic and zero-point Energies=  
Sum of electronic and thermal Energies=  
Sum of electronic and thermal Enthalpies=  
Sum of electronic and thermal Free Energies=

CPCM (Benzene) M06L/def2TZVP E = -3199.39742446

0.697542 (Hartree/Particle)

0.735813  
0.736757  
0.627058

-1574.142972  
-1574.104702  
-1574.103758  
-1574.213457

## TS-OA-Ni(0)-PhBr (ωB97XD opt.)

|    |                 |                 |                 |    |                 |                 |                 |
|----|-----------------|-----------------|-----------------|----|-----------------|-----------------|-----------------|
| Ni | 0.114571000000  | -0.437277000000 | -1.015820000000 | H  | -2.065177000000 | 5.083561000000  | -1.023806000000 |
| C  | 0.631511000000  | 0.574879000000  | 0.382954000000  | H  | -0.874073000000 | 4.920190000000  | 0.274286000000  |
| C  | 0.638250000000  | 2.269781000000  | 2.028889000000  | H  | -0.335683000000 | 5.168626000000  | -1.399961000000 |
| C  | 1.983702000000  | 1.547238000000  | 2.057712000000  | C  | -1.306418000000 | 2.794345000000  | -2.462545000000 |
| N  | 1.908498000000  | 0.746508000000  | 0.837159000000  | H  | -1.198333000000 | 1.715586000000  | -2.617311000000 |
| N  | -0.139978000000 | 1.391279000000  | 1.157503000000  | H  | -2.311250000000 | 3.097612000000  | -2.780902000000 |
| H  | 2.082018000000  | 0.896169000000  | 2.939508000000  | H  | -0.583139000000 | 3.300931000000  | -3.111603000000 |
| H  | 0.176398000000  | 2.367360000000  | 3.015835000000  | C  | -1.886777000000 | 0.024043000000  | 2.930941000000  |
| C  | 2.981903000000  | -0.110165000000 | 0.453062000000  | H  | -0.870803000000 | 0.346264000000  | 3.182997000000  |
| C  | 3.969440000000  | 0.359045000000  | -0.429182000000 | C  | -2.703646000000 | 0.033157000000  | 4.226423000000  |
| C  | 3.028640000000  | -1.414290000000 | 0.982798000000  | H  | -2.841449000000 | 1.049195000000  | 4.612022000000  |
| C  | 5.008278000000  | -0.513956000000 | -0.766188000000 | H  | -3.694056000000 | -0.414931000000 | 4.086044000000  |
| C  | 4.090681000000  | -2.242332000000 | 0.621080000000  | H  | -2.190361000000 | -0.557449000000 | 4.993094000000  |
| C  | 5.077359000000  | -1.798626000000 | -0.248103000000 | C  | -1.778180000000 | -1.396776000000 | 2.361067000000  |
| H  | 5.777093000000  | -0.172096000000 | -1.455454000000 | H  | -1.196932000000 | -1.407383000000 | 1.432633000000  |
| H  | 4.143099000000  | -3.251656000000 | 1.020822000000  | H  | -1.295681000000 | -2.064922000000 | 3.085257000000  |
| H  | 5.894707000000  | -2.456767000000 | -0.528561000000 | H  | -2.772706000000 | -1.795238000000 | 2.135357000000  |
| C  | -1.536868000000 | 1.597561000000  | 0.970434000000  | C  | 1.957904000000  | -1.950532000000 | 1.922125000000  |
| C  | -2.419983000000 | 0.970887000000  | 1.867506000000  | H  | 1.199342000000  | -1.176226000000 | 2.063743000000  |
| C  | -1.994804000000 | 2.437985000000  | -0.054775000000 | C  | 2.538728000000  | -2.286985000000 | 3.301865000000  |
| C  | -3.786040000000 | 1.199516000000  | 1.714474000000  | H  | 1.743198000000  | -2.614886000000 | 3.980982000000  |
| C  | -3.373127000000 | 2.633311000000  | -0.176041000000 | H  | 3.279505000000  | -3.092750000000 | 3.241812000000  |
| C  | -4.260730000000 | 2.026434000000  | 0.701670000000  | H  | 3.031894000000  | -1.415741000000 | 3.747453000000  |
| H  | -4.491934000000 | 0.725103000000  | 2.389166000000  | C  | 1.238553000000  | -3.156270000000 | 1.304423000000  |
| H  | -3.753388000000 | 3.283496000000  | -0.959818000000 | H  | 0.442545000000  | -3.508775000000 | 1.970007000000  |
| H  | -5.328790000000 | 2.197429000000  | 0.597160000000  | H  | 0.786611000000  | -2.871289000000 | 0.347822000000  |
| C  | 4.047780000000  | 1.760171000000  | -1.033749000000 | H  | 1.928443000000  | -3.990057000000 | 1.129056000000  |
| H  | 4.571766000000  | 1.622397000000  | -1.988435000000 | Br | -0.531784000000 | -1.511930000000 | -2.879947000000 |
| C  | 4.943216000000  | 2.664984000000  | -0.171434000000 | C  | -1.976581000000 | -1.836772000000 | -1.591731000000 |
| H  | 5.085047000000  | 3.638359000000  | -0.655122000000 | C  | -2.047520000000 | -3.097350000000 | -1.005409000000 |
| H  | 4.491850000000  | 2.842736000000  | 0.811103000000  | C  | -3.004807000000 | -0.907159000000 | -1.460609000000 |
| H  | 5.927287000000  | 2.212977000000  | -0.009476000000 | C  | -3.175412000000 | -3.425809000000 | -0.258543000000 |
| C  | 2.730494000000  | 2.467301000000  | -1.374232000000 | H  | -1.236414000000 | -3.806334000000 | -1.128831000000 |
| H  | 2.263057000000  | 2.905587000000  | -0.487541000000 | C  | -4.120475000000 | -1.253714000000 | -0.706128000000 |
| H  | 2.934166000000  | 3.283408000000  | -2.077757000000 | H  | -2.927107000000 | 0.073835000000  | -1.914667000000 |
| H  | 2.007161000000  | 1.782816000000  | -1.829016000000 | C  | -4.214793000000 | -2.510777000000 | -0.112956000000 |
| C  | -1.040004000000 | 3.150972000000  | -0.996131000000 | H  | -3.238999000000 | -4.404854000000 | 0.206754000000  |
| H  | -0.028742000000 | 2.806101000000  | -0.771213000000 | H  | -4.915764000000 | -0.526647000000 | -0.581694000000 |
| C  | -1.081875000000 | 4.668952000000  | -0.771922000000 | H  | -5.094594000000 | -2.774022000000 | 0.466349000000  |

|   |                |                |                |   |                |                |                |
|---|----------------|----------------|----------------|---|----------------|----------------|----------------|
| H | 0.719352000000 | 3.273226000000 | 1.585628000000 | H | 2.835233000000 | 2.231562000000 | 2.038328000000 |
|---|----------------|----------------|----------------|---|----------------|----------------|----------------|

Zero-point correction= 0.697554 (Hartree/Particle)  
 Thermal correction to Energy= 0.735732  
 Thermal correction to Enthalpy= 0.736676  
 Thermal correction to Gibbs Free Energy= 0.627581  
 Sum of electronic and zero-point Energies= -4134.159556  
 Sum of electronic and thermal Energies= -4134.121378  
 Sum of electronic and thermal Enthalpies= -4134.120434  
 Sum of electronic and thermal Free Energies= -4134.229529  
 CPCM (Benzene) M06L/def2TZVP E = -5475.58346706

### TS-OA-Ni(0)-PhCl (ωB97XD opt.)

|    |                 |                 |                 |    |                 |                 |                 |
|----|-----------------|-----------------|-----------------|----|-----------------|-----------------|-----------------|
| Ni | 0.068989000000  | -0.224273000000 | -1.287008000000 | H  | -1.069560000000 | 4.673261000000  | 1.121747000000  |
| C  | 0.576522000000  | 0.455836000000  | 0.297973000000  | H  | -0.554807000000 | 5.314295000000  | -0.452477000000 |
| C  | 0.527032000000  | 1.762675000000  | 2.269268000000  | C  | -1.448043000000 | 3.213817000000  | -2.027916000000 |
| C  | 1.886281000000  | 1.072294000000  | 2.165213000000  | H  | -1.317826000000 | 2.201611000000  | -2.424916000000 |
| N  | 1.842803000000  | 0.541372000000  | 0.803755000000  | H  | -2.459743000000 | 3.560646000000  | -2.270684000000 |
| N  | -0.217865000000 | 1.089429000000  | 1.208077000000  | H  | -0.737994000000 | 3.870686000000  | -2.542888000000 |
| H  | 1.988801000000  | 0.254094000000  | 2.893972000000  | C  | -1.908566000000 | -0.694894000000 | 2.639110000000  |
| H  | 0.046648000000  | 1.627538000000  | 3.243102000000  | H  | -0.871197000000 | -0.441081000000 | 2.878814000000  |
| C  | 2.938250000000  | -0.209127000000 | 0.285737000000  | C  | -2.649187000000 | -0.892284000000 | 3.965486000000  |
| C  | 3.951119000000  | 0.442032000000  | -0.438240000000 | H  | -2.725897000000 | 0.045777000000  | 4.525910000000  |
| C  | 2.989319000000  | -1.593542000000 | 0.540331000000  | H  | -3.663144000000 | -1.279514000000 | 3.813218000000  |
| C  | 5.024159000000  | -0.330366000000 | -0.893202000000 | H  | -2.115767000000 | -1.620732000000 | 4.585929000000  |
| C  | 4.083135000000  | -2.317322000000 | 0.067306000000  | C  | -1.870367000000 | -1.993162000000 | 1.822850000000  |
| C  | 5.098816000000  | -1.692611000000 | -0.642986000000 | H  | -1.343344000000 | -1.843410000000 | 0.874227000000  |
| H  | 5.815899000000  | 0.155010000000  | -1.459548000000 | H  | -1.362438000000 | -2.786621000000 | 2.385183000000  |
| H  | 4.138614000000  | -3.386885000000 | 0.252318000000  | H  | -2.885604000000 | -2.332355000000 | 1.591263000000  |
| H  | 5.943738000000  | -2.268396000000 | -1.009554000000 | C  | 1.887832000000  | -2.324043000000 | 1.295136000000  |
| C  | -1.621236000000 | 1.275532000000  | 1.061364000000  | H  | 1.114898000000  | -1.601557000000 | 1.568450000000  |
| C  | -2.475841000000 | 0.433137000000  | 1.792996000000  | C  | 2.412909000000  | -2.954001000000 | 2.591928000000  |
| C  | -2.113886000000 | 2.295865000000  | 0.234457000000  | H  | 1.591243000000  | -3.422975000000 | 3.145695000000  |
| C  | -3.851182000000 | 0.625949000000  | 1.672833000000  | H  | 3.162445000000  | -3.727627000000 | 2.388700000000  |
| C  | -3.499091000000 | 2.450461000000  | 0.139741000000  | H  | 2.878334000000  | -2.202551000000 | 3.239622000000  |
| C  | -4.360509000000 | 1.626721000000  | 0.852555000000  | C  | 1.211377000000  | -3.366864000000 | 0.396666000000  |
| H  | -4.535092000000 | -0.016233000000 | 2.219912000000  | H  | 0.385063000000  | -3.853790000000 | 0.926818000000  |
| H  | -3.907572000000 | 3.234474000000  | -0.492733000000 | H  | 0.804932000000  | -2.878955000000 | -0.495914000000 |
| H  | -5.435000000000 | 1.766660000000  | 0.770508000000  | H  | 1.917432000000  | -4.143298000000 | 0.079364000000  |
| C  | 4.016079000000  | 1.936764000000  | -0.750093000000 | Cl | -0.582053000000 | -0.785649000000 | -3.283113000000 |
| H  | 4.580418000000  | 1.999462000000  | -1.689727000000 | C  | -1.848462000000 | -1.491173000000 | -2.197840000000 |
| C  | 4.852801000000  | 2.672780000000  | 0.309128000000  | C  | -1.799041000000 | -2.862618000000 | -1.956894000000 |
| H  | 4.996828000000  | 3.721429000000  | 0.024540000000  | C  | -2.951627000000 | -0.720137000000 | -1.834937000000 |
| H  | 4.354329000000  | 2.658770000000  | 1.284719000000  | C  | -2.875344000000 | -3.467520000000 | -1.315056000000 |
| H  | 5.837621000000  | 2.210005000000  | 0.431566000000  | H  | -0.933306000000 | -3.439232000000 | -2.263083000000 |
| C  | 2.693600000000  | 2.671368000000  | -1.003202000000 | C  | -4.014040000000 | -1.345829000000 | -1.193059000000 |
| H  | 2.176634000000  | 2.914185000000  | -0.070124000000 | H  | -2.968028000000 | 0.347111000000  | -2.024033000000 |
| H  | 2.902421000000  | 3.615813000000  | -1.519779000000 | C  | -3.985450000000 | -2.715984000000 | -0.939205000000 |
| H  | 2.008822000000  | 2.077557000000  | -1.617050000000 | H  | -2.842429000000 | -4.534356000000 | -1.115500000000 |
| C  | -1.185983000000 | 3.233554000000  | -0.518291000000 | H  | -4.865736000000 | -0.748476000000 | -0.885521000000 |
| H  | -0.163417000000 | 2.876655000000  | -0.373913000000 | H  | -4.824974000000 | -3.194853000000 | -0.446691000000 |
| C  | -1.277432000000 | 4.658288000000  | 0.045940000000  | H  | 0.595306000000  | 2.841269000000  | 2.065677000000  |
| H  | -2.276973000000 | 5.083385000000  | -0.104806000000 | H  | 2.724417000000  | 1.759724000000  | 2.301442000000  |

Zero-point correction= 0.697620 (Hartree/Particle)  
 Thermal correction to Energy= 0.735678  
 Thermal correction to Enthalpy= 0.736622  
 Thermal correction to Gibbs Free Energy= 0.628126  
 Sum of electronic and zero-point Energies= -2022.900574  
 Sum of electronic and thermal Energies= -2022.862516  
 Sum of electronic and thermal Enthalpies= -2022.861572  
 Sum of electronic and thermal Free Energies= -2022.970069  
 CPCM (Benzene) M06L/def2TZVP E = -3361.72912894

### SIPr-Ni-Ph-I (ωB97XD opt.)

|    |                 |                 |                 |   |                 |                 |                 |
|----|-----------------|-----------------|-----------------|---|-----------------|-----------------|-----------------|
| Ni | -0.596170000000 | -0.733962000000 | -0.388469000000 | C | -3.519759000000 | 2.597355000000  | -0.867608000000 |
| C  | 0.252803000000  | 0.712824000000  | 0.657673000000  | C | -4.552635000000 | 2.091090000000  | -0.091923000000 |
| C  | 1.539460000000  | 2.120682000000  | 2.009966000000  | H | -5.080243000000 | 1.002663000000  | 1.677997000000  |
| C  | 0.166125000000  | 2.760421000000  | 1.799904000000  | H | -3.747334000000 | 3.102559000000  | -1.801846000000 |
| N  | -0.564506000000 | 1.658667000000  | 1.163085000000  | H | -5.583010000000 | 2.209556000000  | -0.413768000000 |
| N  | 1.493114000000  | 0.991568000000  | 1.070190000000  | C | 2.641631000000  | 0.165571000000  | 0.864794000000  |
| H  | 0.209989000000  | 3.622139000000  | 1.121204000000  | C | 3.623535000000  | 0.607845000000  | -0.034357000000 |
| H  | 2.369318000000  | 2.790917000000  | 1.776799000000  | C | 2.759913000000  | -1.037156000000 | 1.575551000000  |
| C  | -1.926413000000 | 1.791387000000  | 0.741636000000  | C | 4.744022000000  | -0.198979000000 | -0.221223000000 |
| C  | -2.955461000000 | 1.253784000000  | 1.537069000000  | C | 3.891363000000  | -1.819197000000 | 1.340472000000  |
| C  | -2.188770000000 | 2.450616000000  | -0.473604000000 | C | 4.874254000000  | -1.407081000000 | 0.451450000000  |
| C  | -4.267537000000 | 1.420159000000  | 1.089899000000  | H | 5.518118000000  | 0.113308000000  | -0.916216000000 |

|   |                |                |                |   |                |                |                |
|---|----------------|----------------|----------------|---|----------------|----------------|----------------|
| H | 4.00351600000  | -2.76676200000 | 1.85992200000  | C | 3.60246300000  | 1.73940500000  | -2.30343700000 |
| H | 5.74680700000  | -2.03060100000 | 0.28101800000  | H | 2.85601800000  | 1.02327300000  | -2.65794700000 |
| C | -2.74651700000 | 0.42829300000  | 2.80347100000  | H | 3.44015100000  | 2.69820200000  | -2.80930300000 |
| H | -3.73666200000 | 0.37352900000  | 3.27296600000  | H | 4.59318700000  | 1.37405900000  | -2.59664100000 |
| C | -1.80793900000 | 1.02566000000  | 3.85917600000  | C | -1.08183200000 | 2.96955100000  | -1.37993200000 |
| H | -1.95125000000 | 0.50256700000  | 4.81080800000  | H | -0.11630200000 | 2.70348000000  | -0.94029300000 |
| H | -0.75672200000 | 0.90925700000  | 3.58026400000  | C | -1.13333500000 | 4.49865800000  | -1.50385800000 |
| H | -2.01386200000 | 2.08820000000  | 4.02869500000  | H | -0.29732300000 | 4.85836600000  | -2.11347000000 |
| C | -2.34286600000 | -1.01553400000 | 2.46867900000  | H | -2.06185100000 | 4.82687900000  | -1.98469000000 |
| H | -1.34503500000 | -1.05253200000 | 2.01266000000  | H | -1.07808400000 | 4.98459000000  | -1.52306300000 |
| H | -2.30506900000 | -1.62100200000 | 3.38193200000  | C | -1.13029200000 | 2.29461900000  | -2.75756900000 |
| H | -3.04501900000 | -1.47911300000 | 1.76948800000  | H | -0.28911300000 | 2.63397700000  | -3.37157400000 |
| C | 1.71307200000  | -1.50509400000 | 2.57410900000  | H | -1.05662200000 | 1.20630500000  | -2.66659800000 |
| H | 0.93759200000  | -0.73571600000 | 2.64704800000  | H | -2.05615700000 | 2.53615200000  | -3.29213600000 |
| C | 2.31145700000  | -1.67237400000 | 3.97744300000  | I | 0.95976900000  | -1.46373900000 | -2.16521400000 |
| H | 3.07071500000  | -2.46191900000 | 3.99786800000  | C | -1.90050400000 | -1.88378700000 | -0.93819500000 |
| H | 2.78444600000  | -0.74581300000 | 4.32111500000  | C | -1.97299400000 | -3.25414600000 | -0.66480900000 |
| H | 1.52871900000  | -1.94543500000 | 4.69402200000  | C | -3.08298300000 | -1.16932100000 | -1.17176600000 |
| C | 1.02912500000  | -2.79433600000 | 2.10192100000  | C | -3.21222900000 | -3.87909500000 | -0.54755400000 |
| H | 0.59060300000  | -2.66289000000 | 1.10699700000  | H | -1.05854500000 | -3.82573500000 | -0.52915400000 |
| H | 1.74578900000  | -3.62136600000 | 2.04251300000  | C | -4.32430300000 | -1.79598300000 | -1.04771100000 |
| H | 0.23306100000  | -3.08333000000 | 2.79764600000  | H | -3.04840500000 | -0.11277500000 | -1.43486400000 |
| C | 3.49771500000  | 1.92412600000  | -0.78454500000 | C | -4.38871700000 | -3.14959600000 | -0.72885000000 |
| H | 2.50083300000  | 2.33183300000  | -0.58509000000 | H | -3.26449100000 | -4.93997900000 | -0.31620000000 |
| C | 4.53724900000  | 2.93714800000  | -0.28124500000 | H | -5.23634300000 | -1.22725300000 | -1.21117300000 |
| H | 4.46344600000  | 3.09178800000  | 0.80139400000  | H | -5.35276900000 | -3.64230700000 | -0.63723600000 |
| H | 5.55458000000  | 2.58831800000  | -0.49275800000 | H | 1.67387400000  | 1.73836100000  | 3.03055200000  |
| H | 4.40459400000  | 3.90530500000  | -0.77711400000 | H | -0.31494700000 | 3.07130400000  | 2.72860400000  |

|                                              |                             |
|----------------------------------------------|-----------------------------|
| Zero-point correction=                       | 0.698573 (Hartree/Particle) |
| Thermal correction to Energy=                | 0.737342                    |
| Thermal correction to Enthalpy=              | 0.738286                    |
| Thermal correction to Gibbs Free Energy=     | 0.627202                    |
| Sum of electronic and zero-point Energies=   | -1574.211438                |
| Sum of electronic and thermal Energies=      | -1574.172669                |
| Sum of electronic and thermal Enthalpies=    | -1574.171725                |
| Sum of electronic and thermal Free Energies= | -1574.282809                |
| CPCM (Benzene) M06L/def2TZVP E =             | -3199.45039205              |

## 6. NMR Spectra

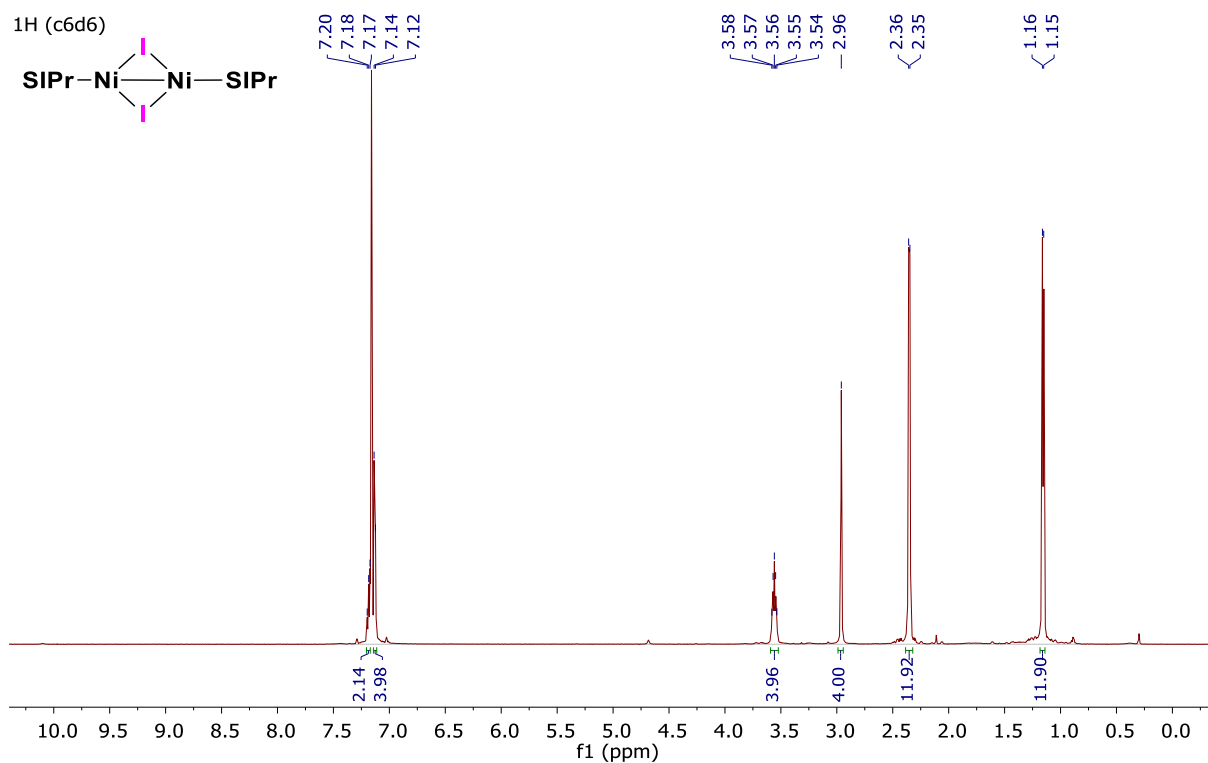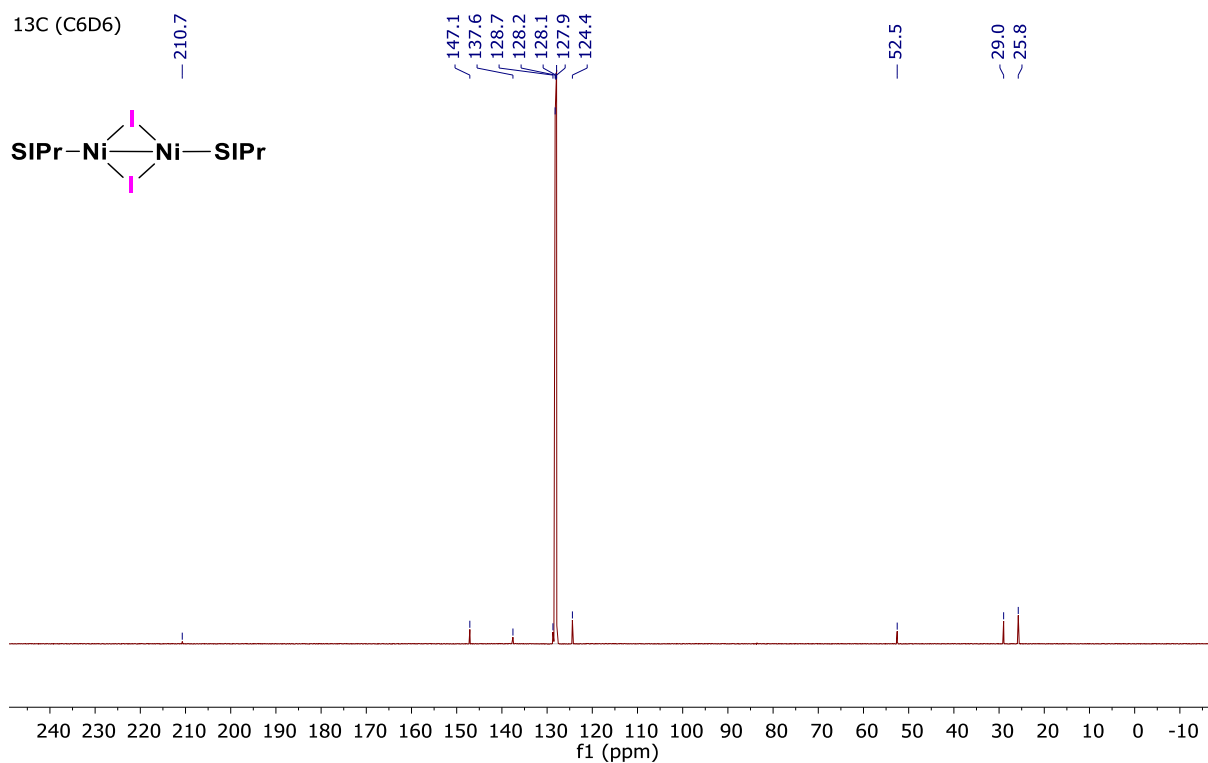



1H (c6d6)

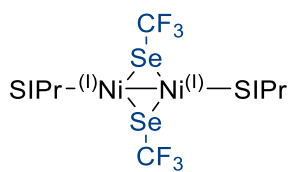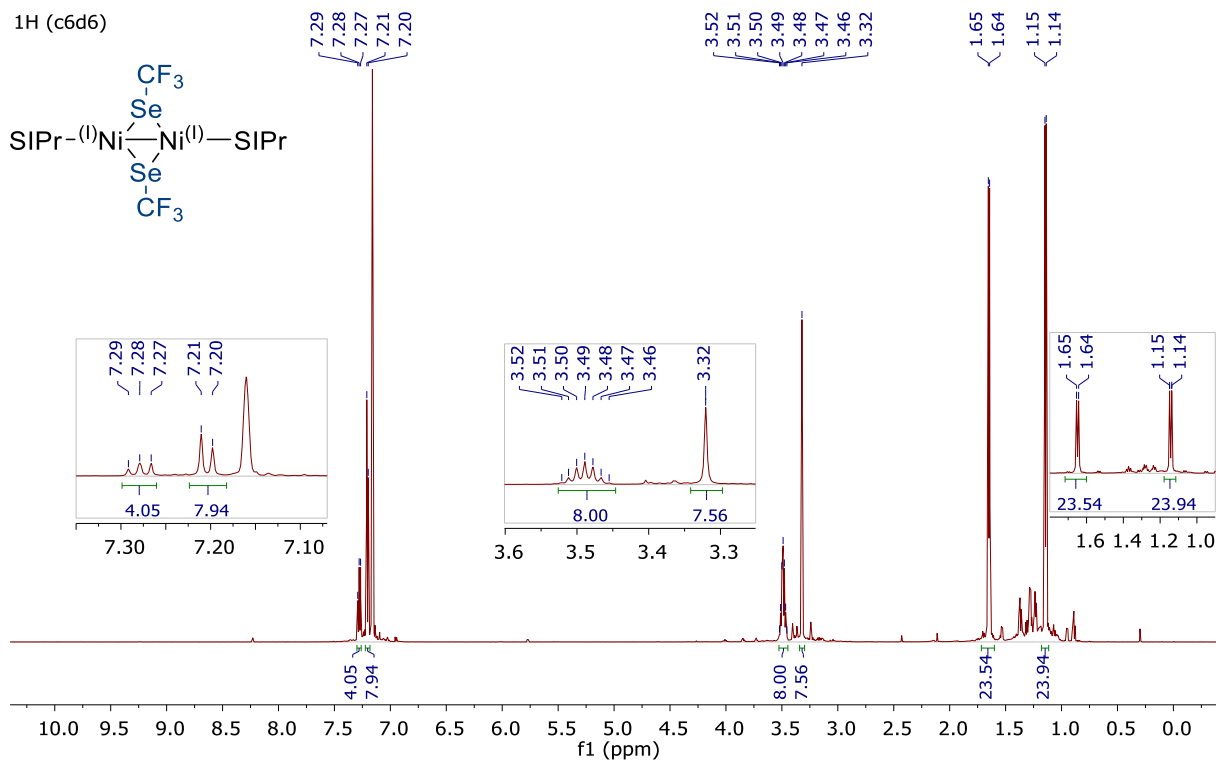

13C (c6d6)

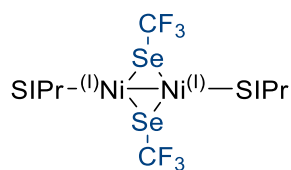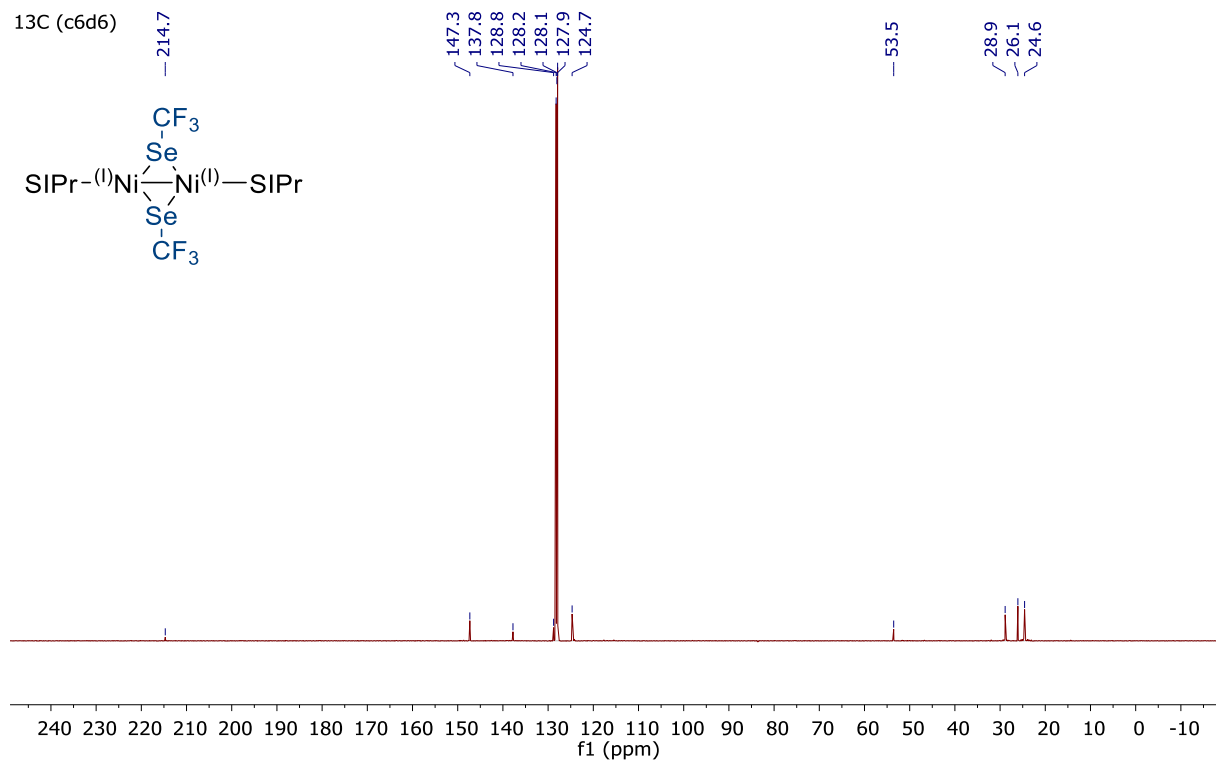

<sup>19</sup>F (c6d6)

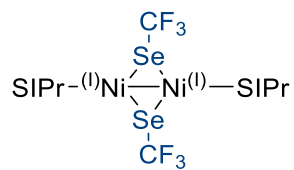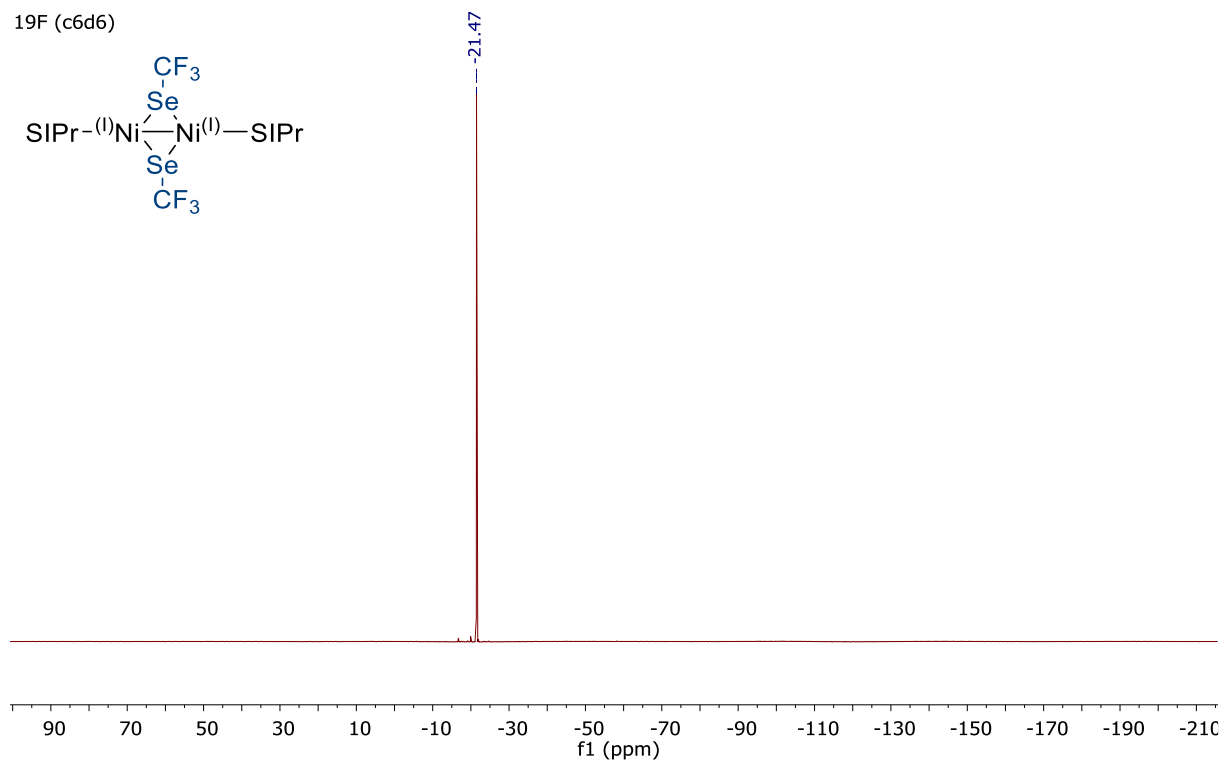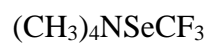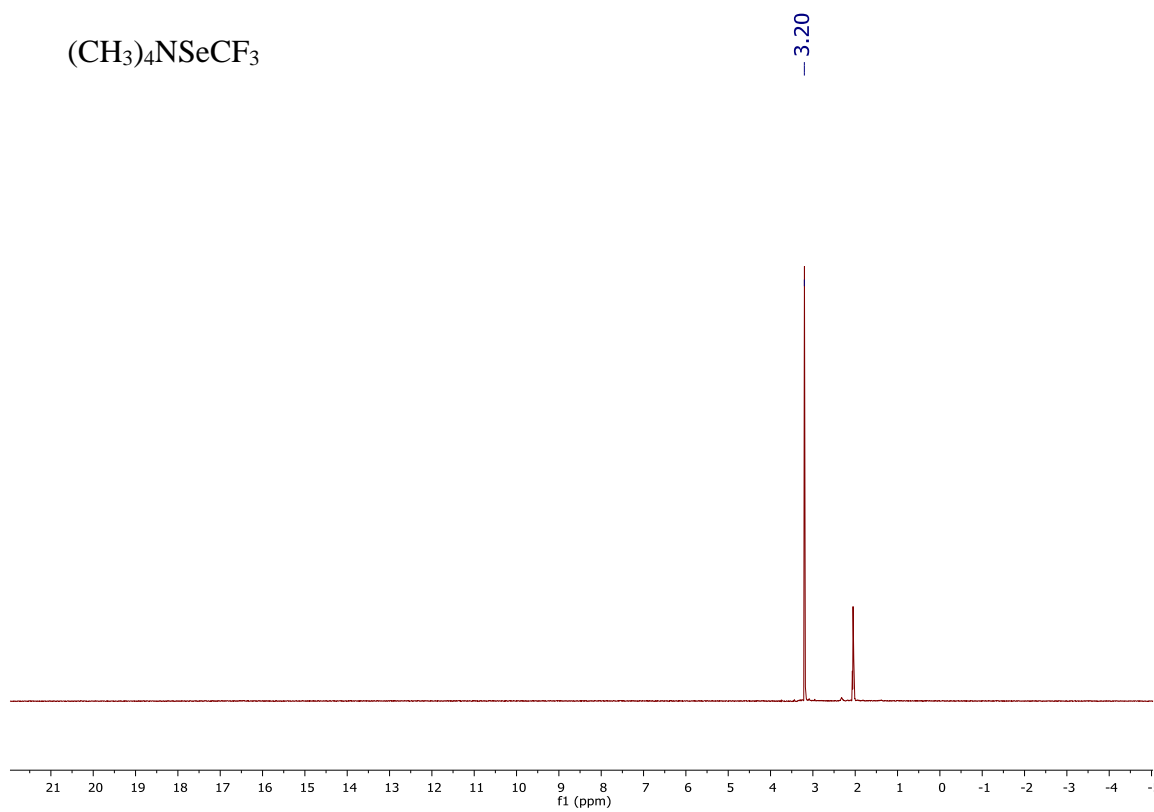

$^{19}\text{F}$ -NMR  $[(\text{CD}_3)_2\text{CO}]$

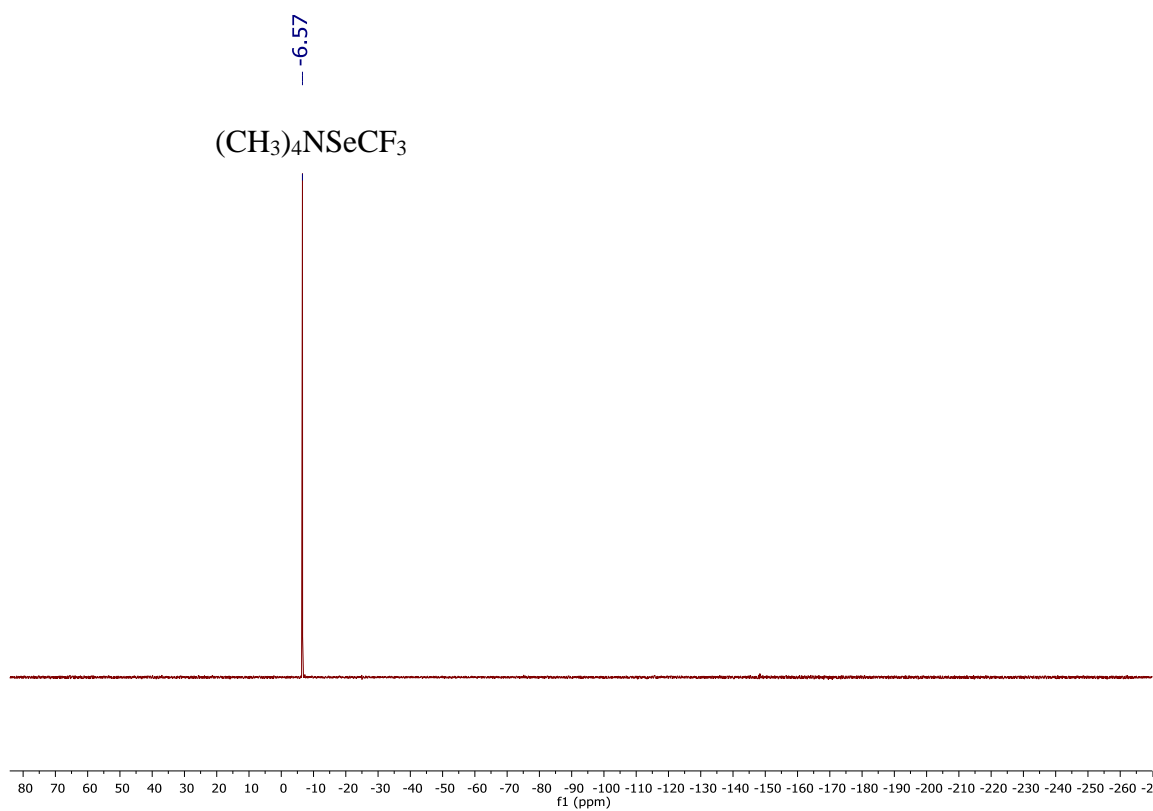

$^1\text{H}$  (cd $2\text{cl}_2$ )

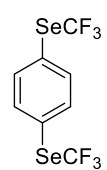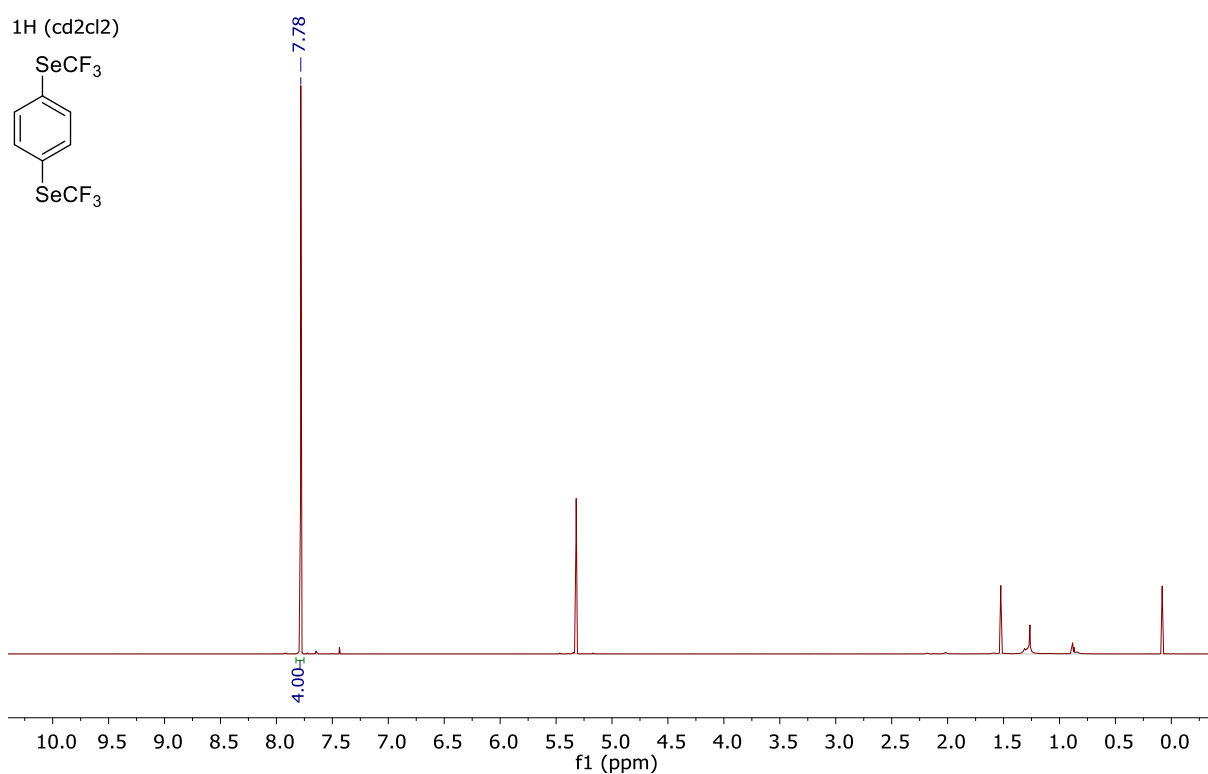

<sup>13</sup>C (cd<sub>2</sub>cl<sub>2</sub>)

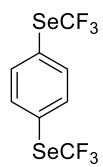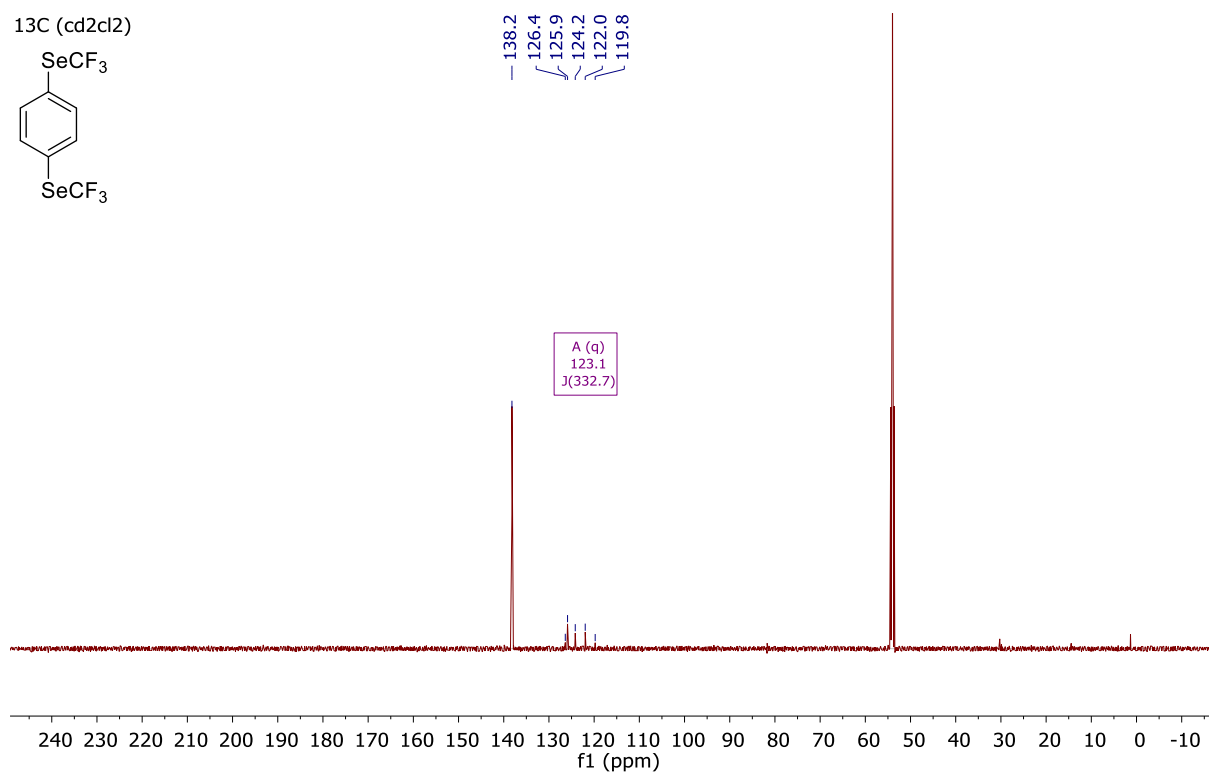

<sup>19</sup>F (cd<sub>2</sub>cl<sub>2</sub>)

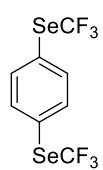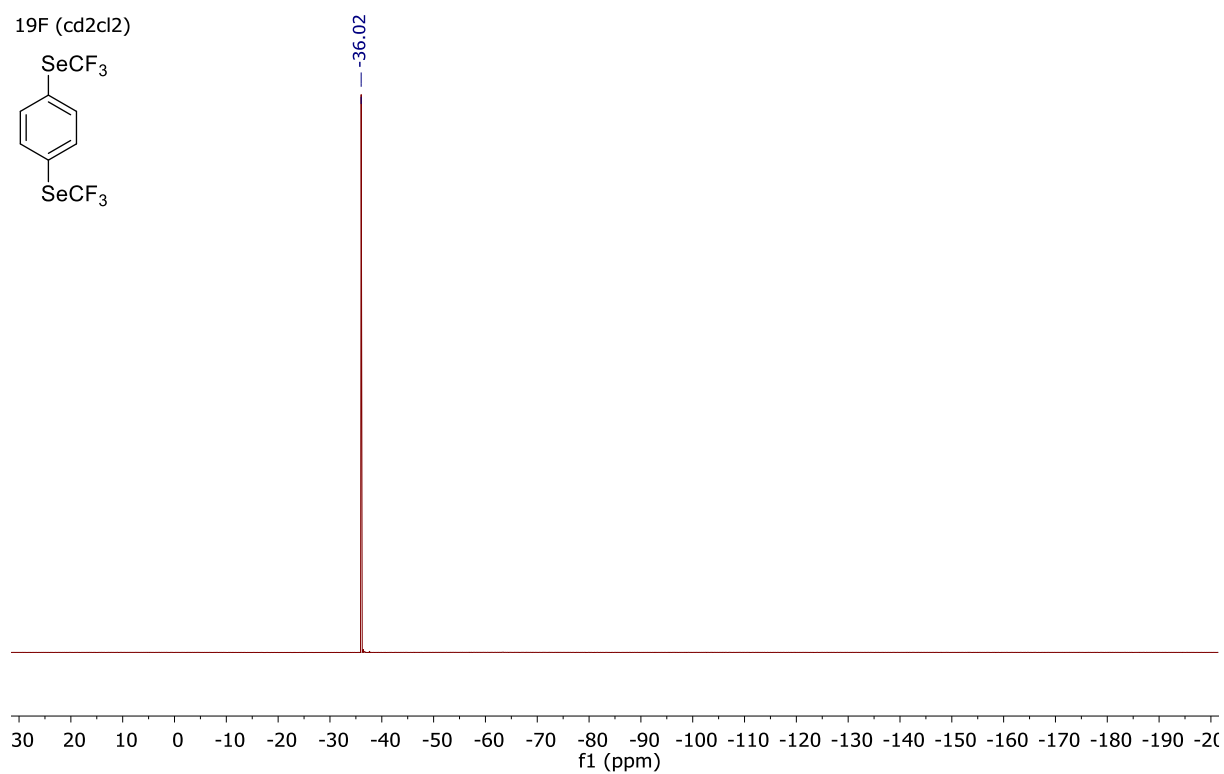

1H (cd2cl2)

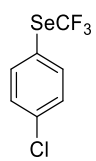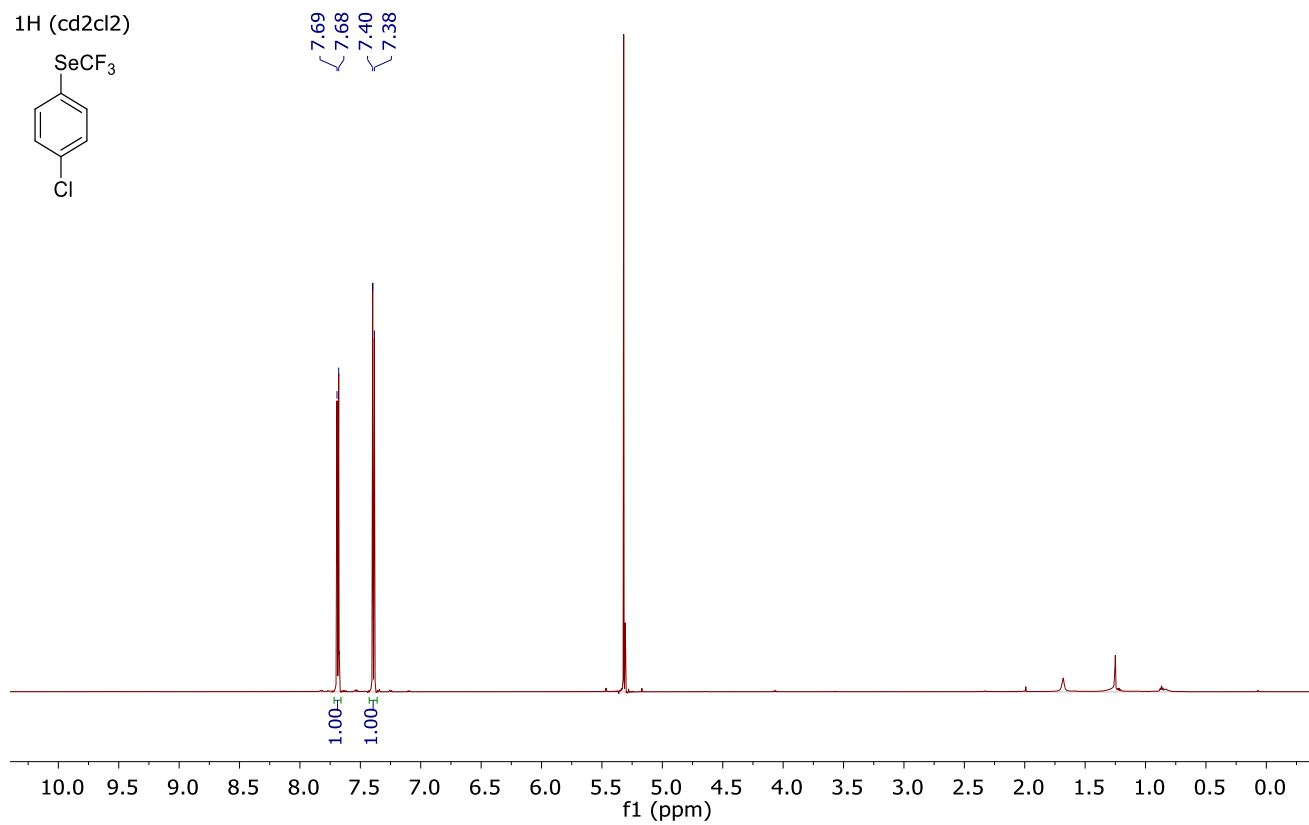

19F (cd2cl2)

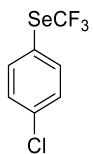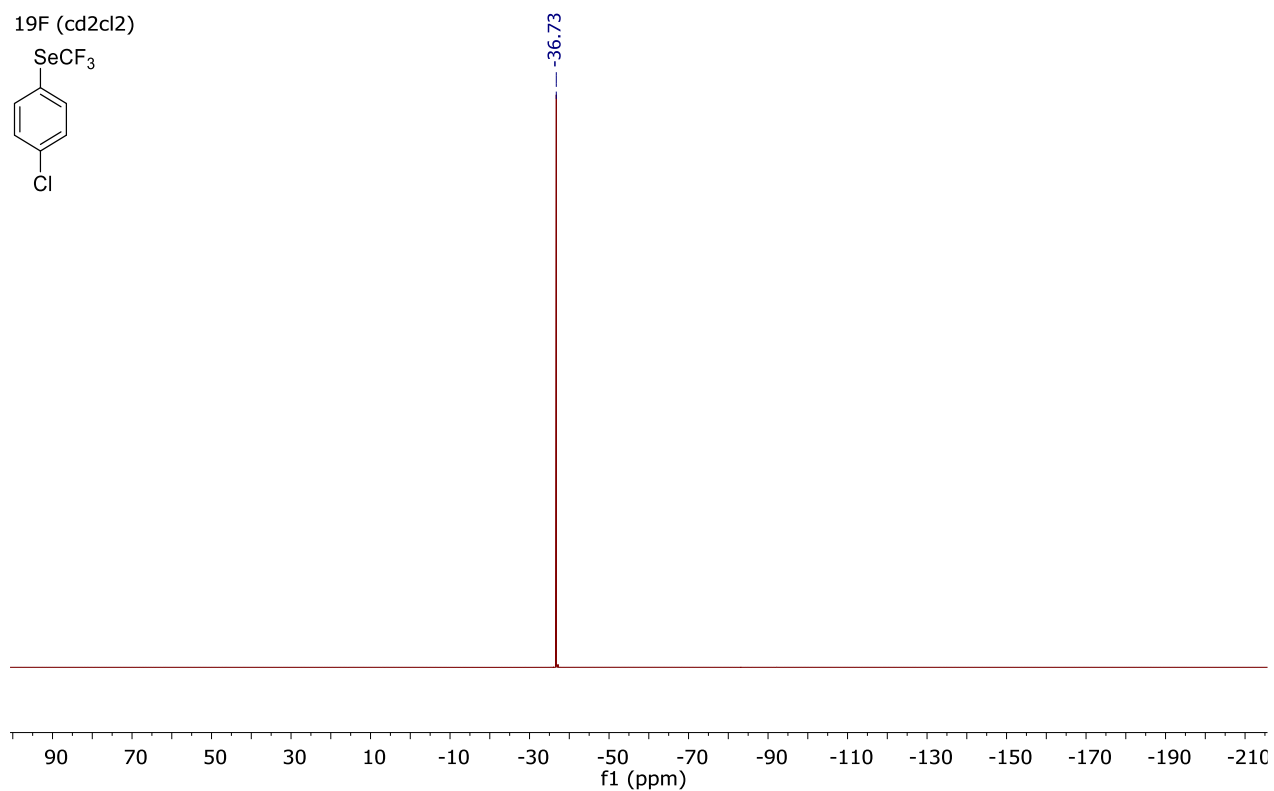

<sup>13</sup>C (cd<sub>2</sub>cl<sub>2</sub>)

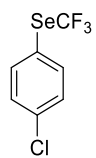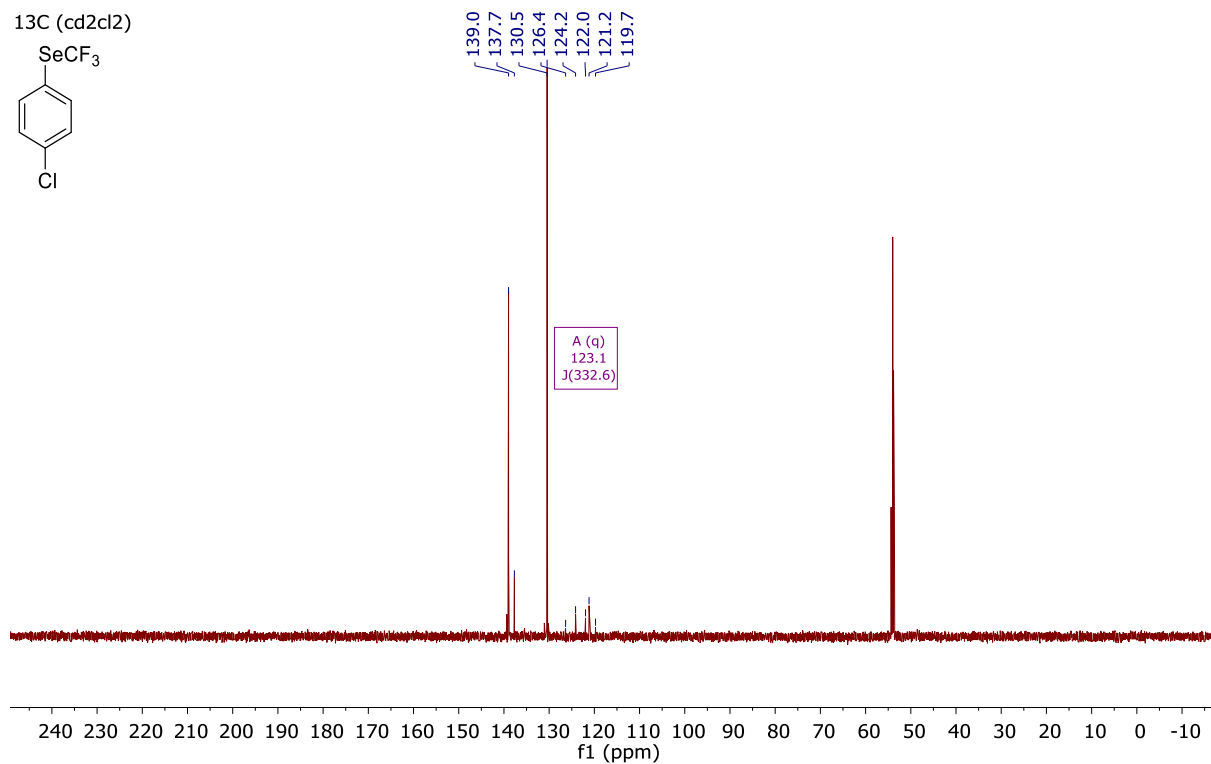

<sup>1</sup>H (cd<sub>2</sub>cl<sub>2</sub>)

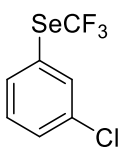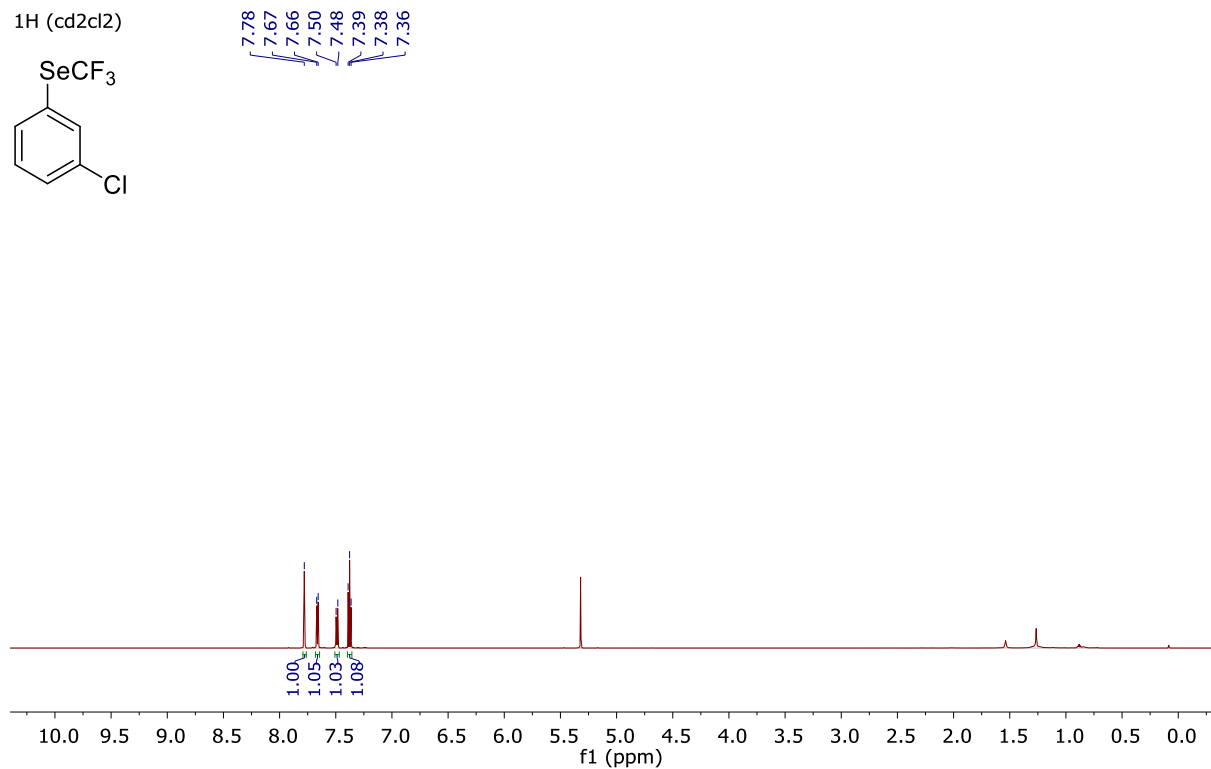

<sup>13</sup>C (cd<sub>2</sub>cl<sub>2</sub>)

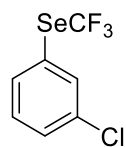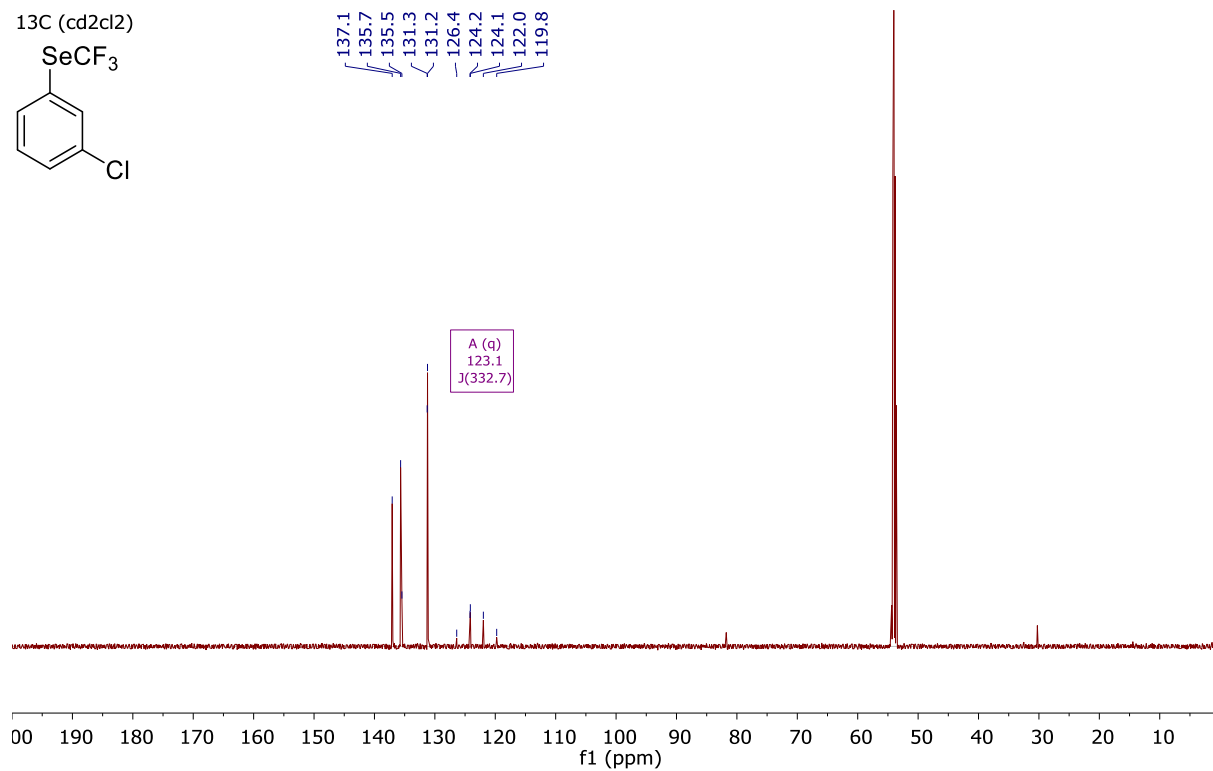

<sup>19</sup>F (cd<sub>2</sub>cl<sub>2</sub>)

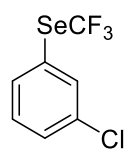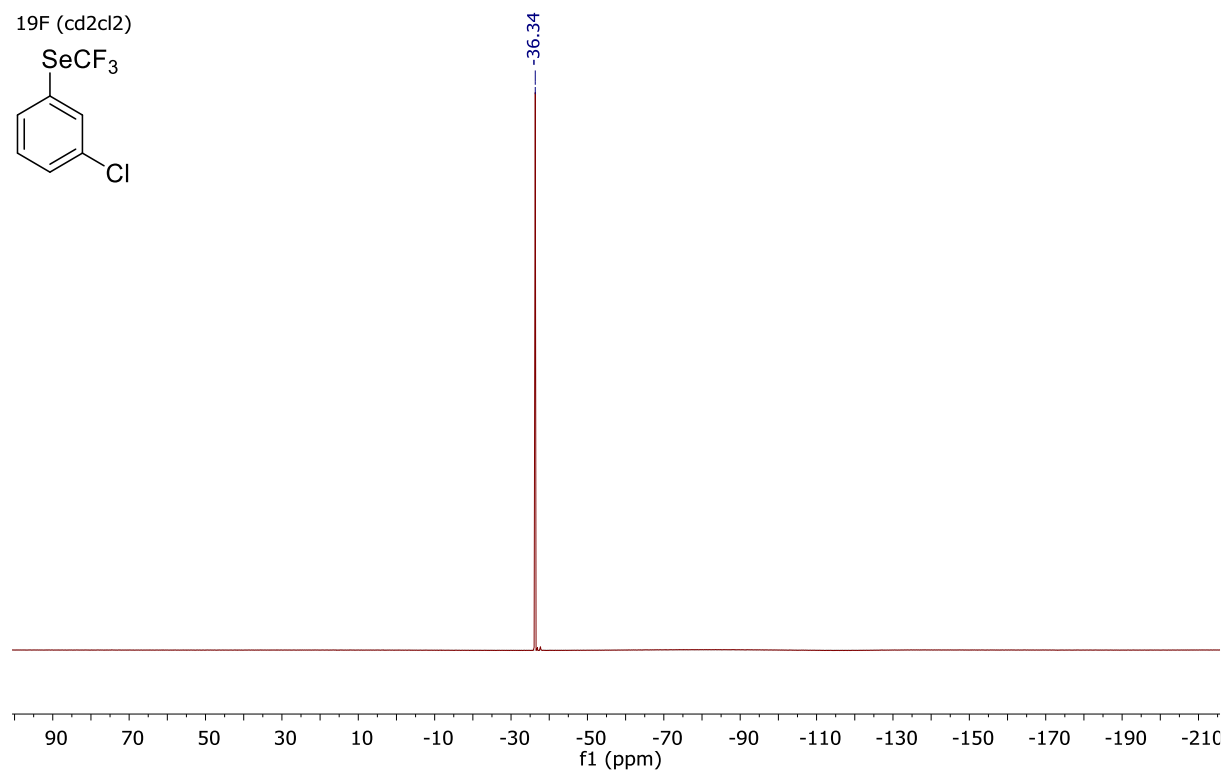

1H (CDCl3)

7.67  
7.67  
7.66  
7.65  
7.37  
6.97  
6.96  
6.95  
6.95

5.05

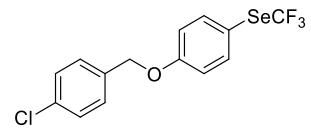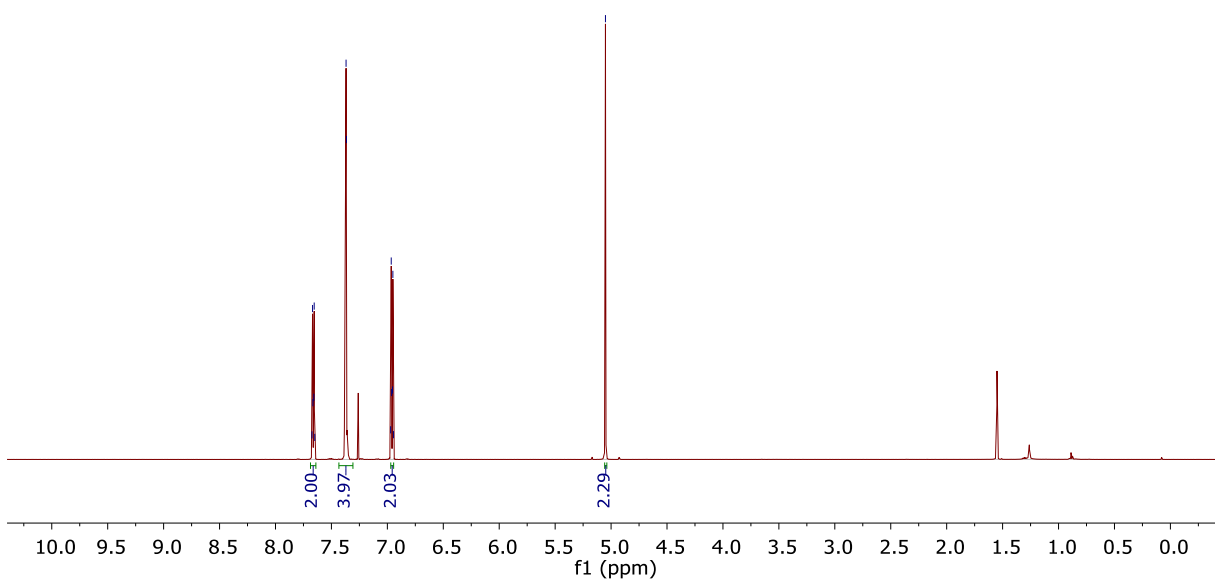

13C (CDCl3)

160.3

139.0  
134.8  
134.1  
128.9  
125.8  
123.6  
121.4  
119.1  
116.0  
113.5

69.3

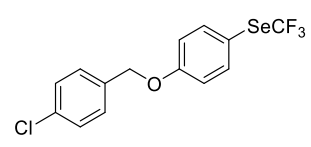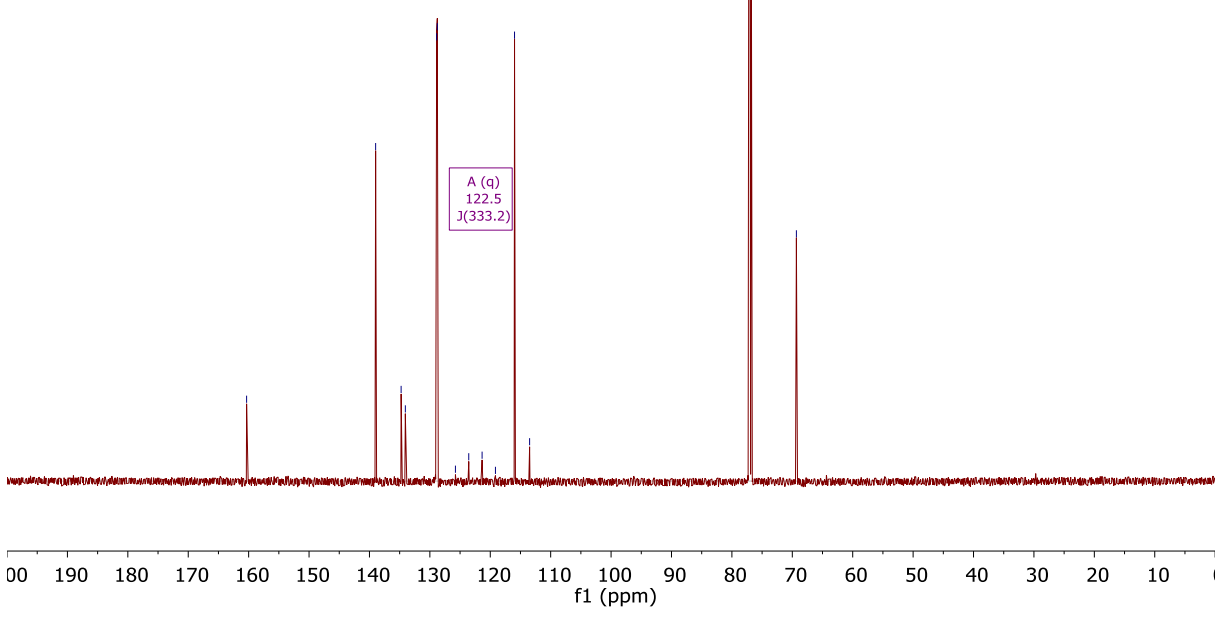



19F (CDCl3)

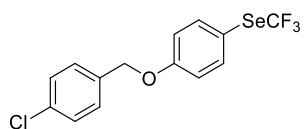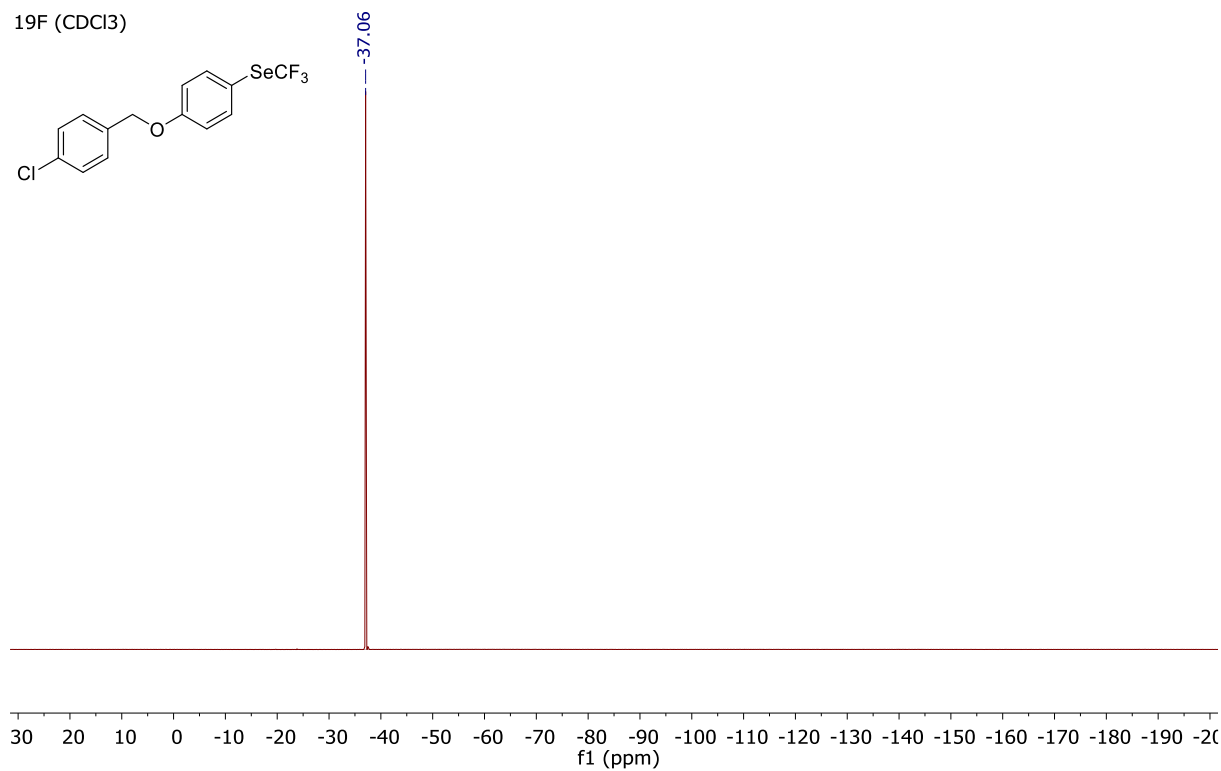

1H (CDCl3)

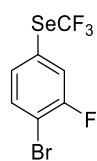

7.62  
7.60  
7.60  
7.58  
7.53  
7.52  
7.51  
7.51  
7.42  
7.41  
7.41  
7.41  
7.39  
7.39  
7.39

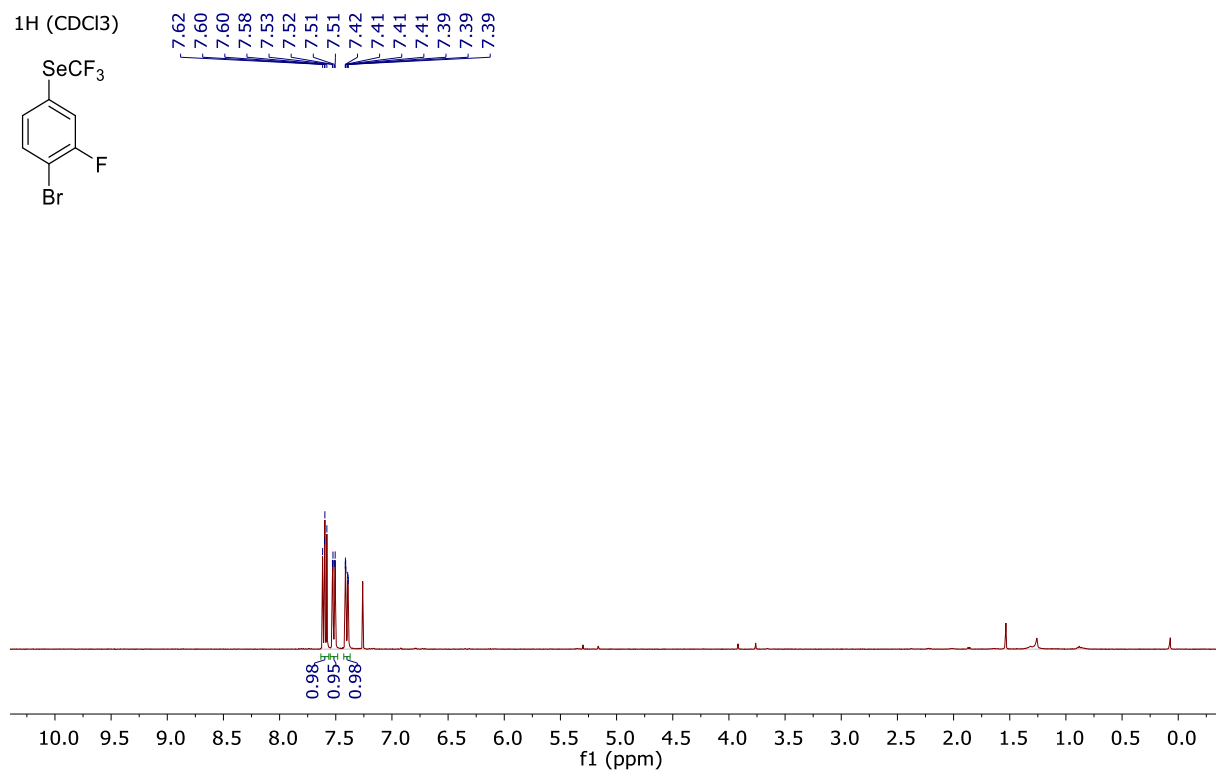

$^{13}\text{C}\{^1\text{H}\}$  ( $\text{CDCl}_3$ )

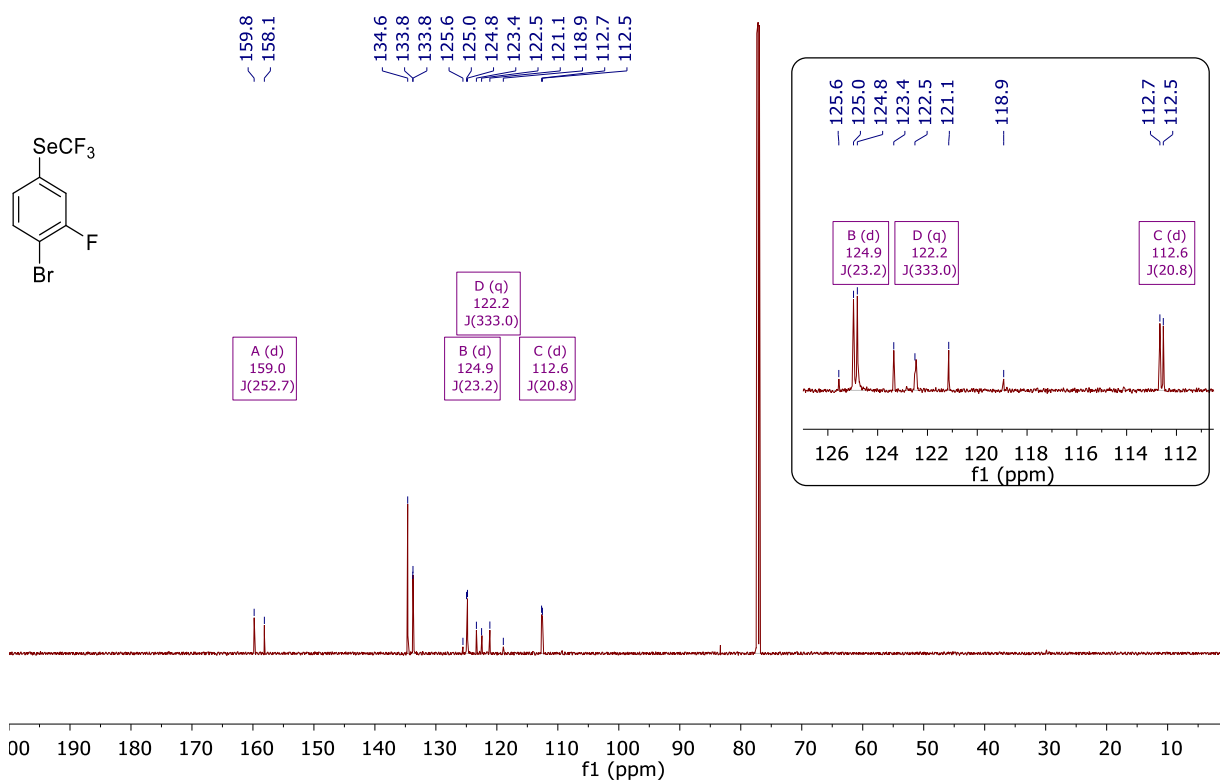

$^{13}\text{C}\{^1\text{H}, ^{19}\text{F}\}$  ( $\text{CDCl}_3$ )

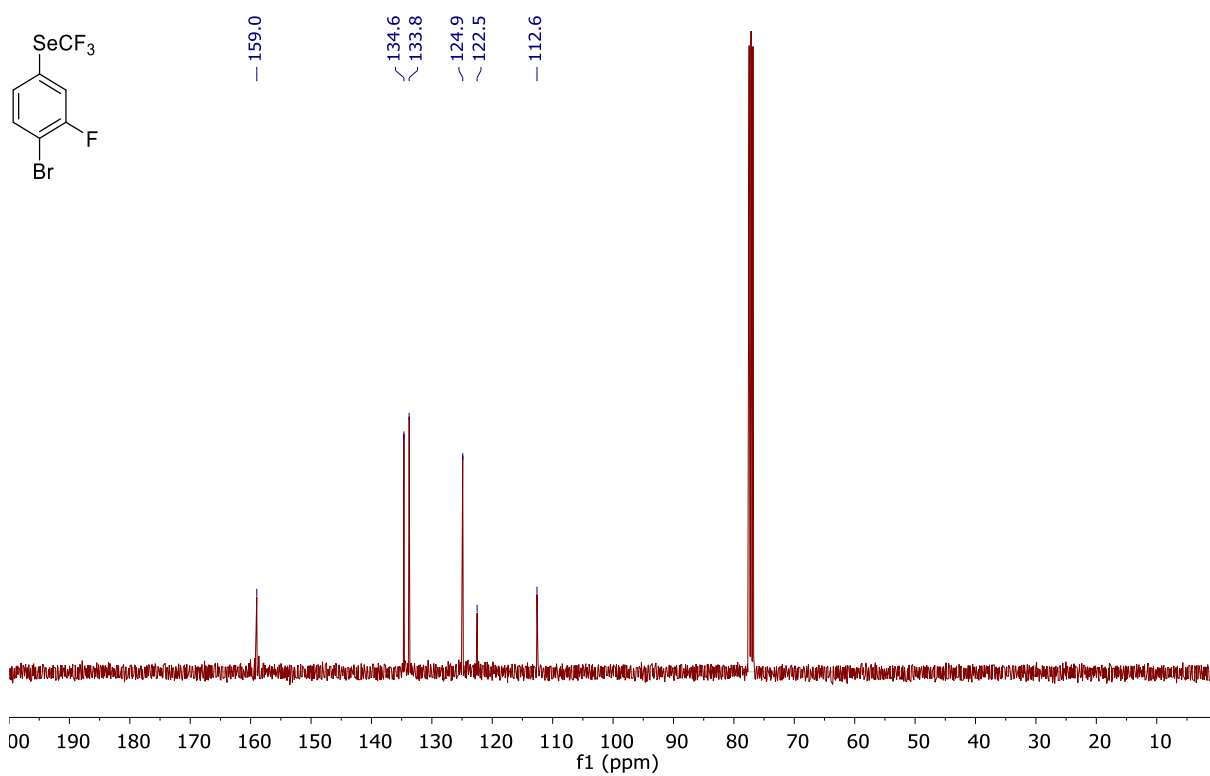

19F (CDCl3)

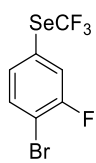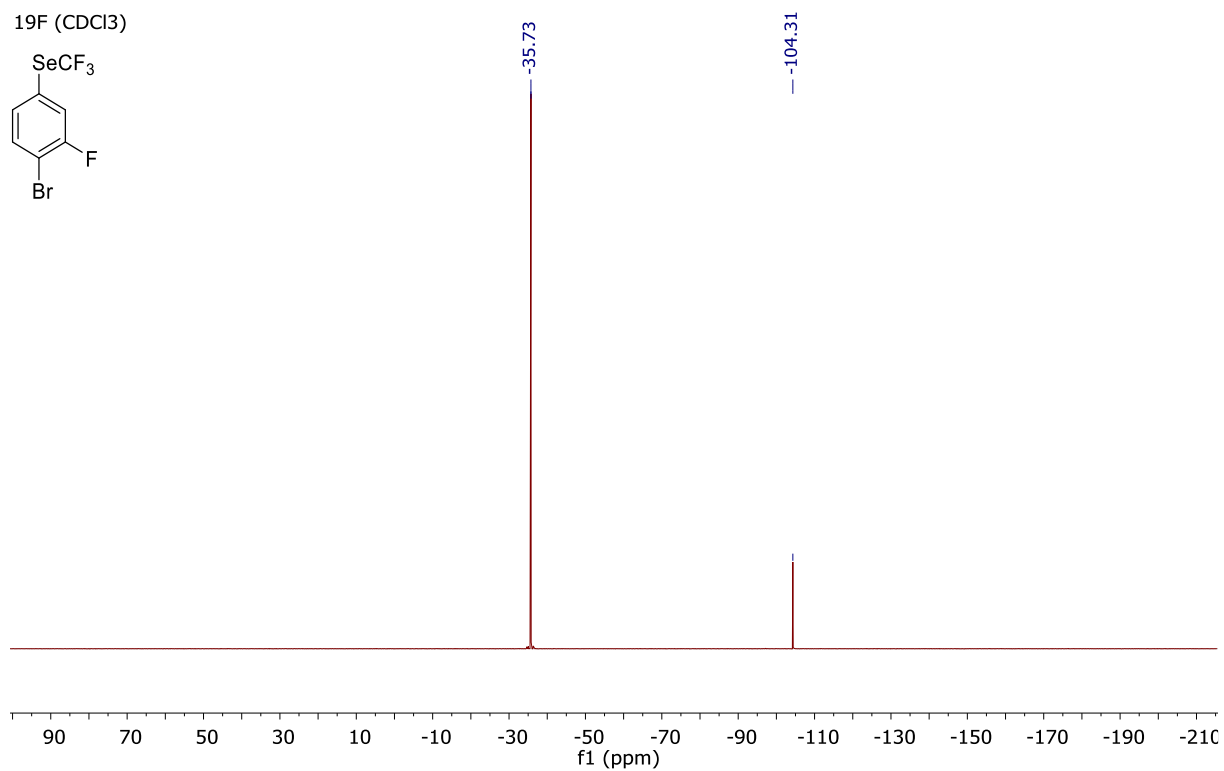

1H (CDCl3)

7.57  
7.57  
7.56  
7.55  
7.55  
7.55  
7.37  
7.35  
7.35  
7.35  
7.33  
7.33  
6.74  
6.74  
6.73  
6.72  
6.72  
6.71

5.00

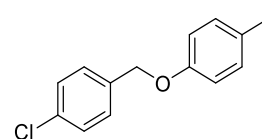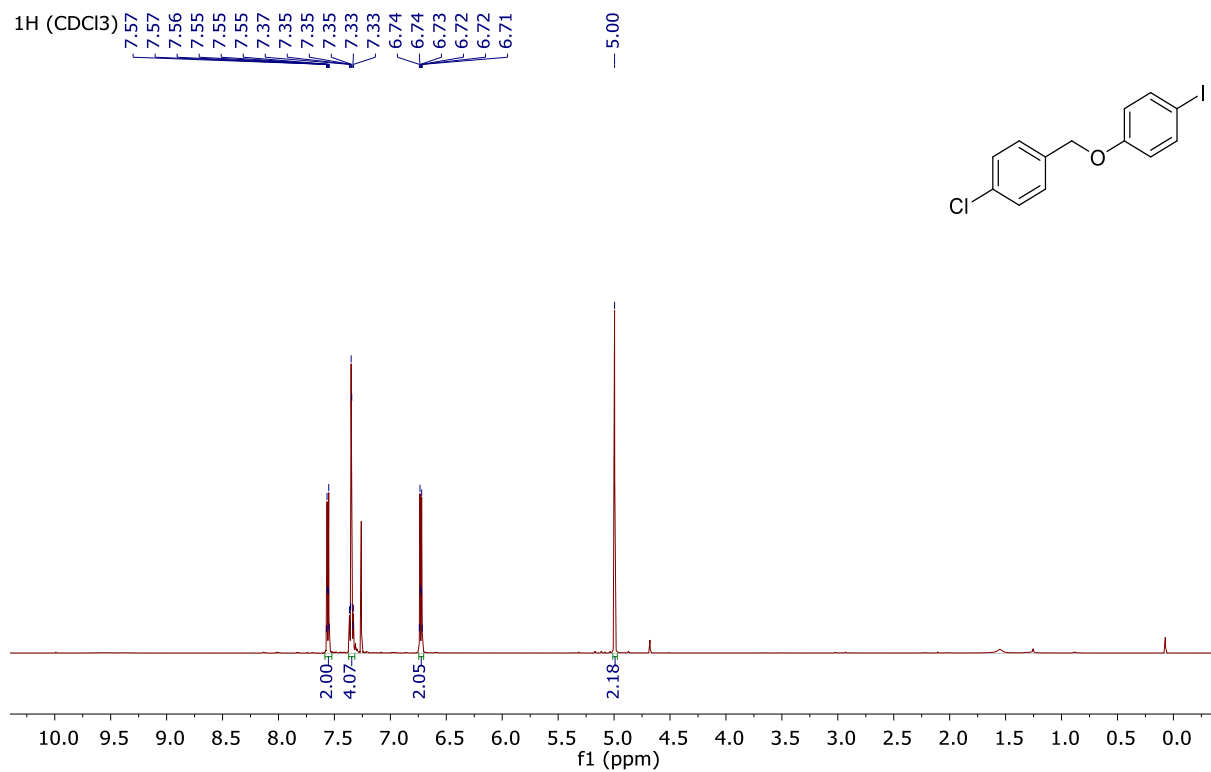

13C (CDCl3)

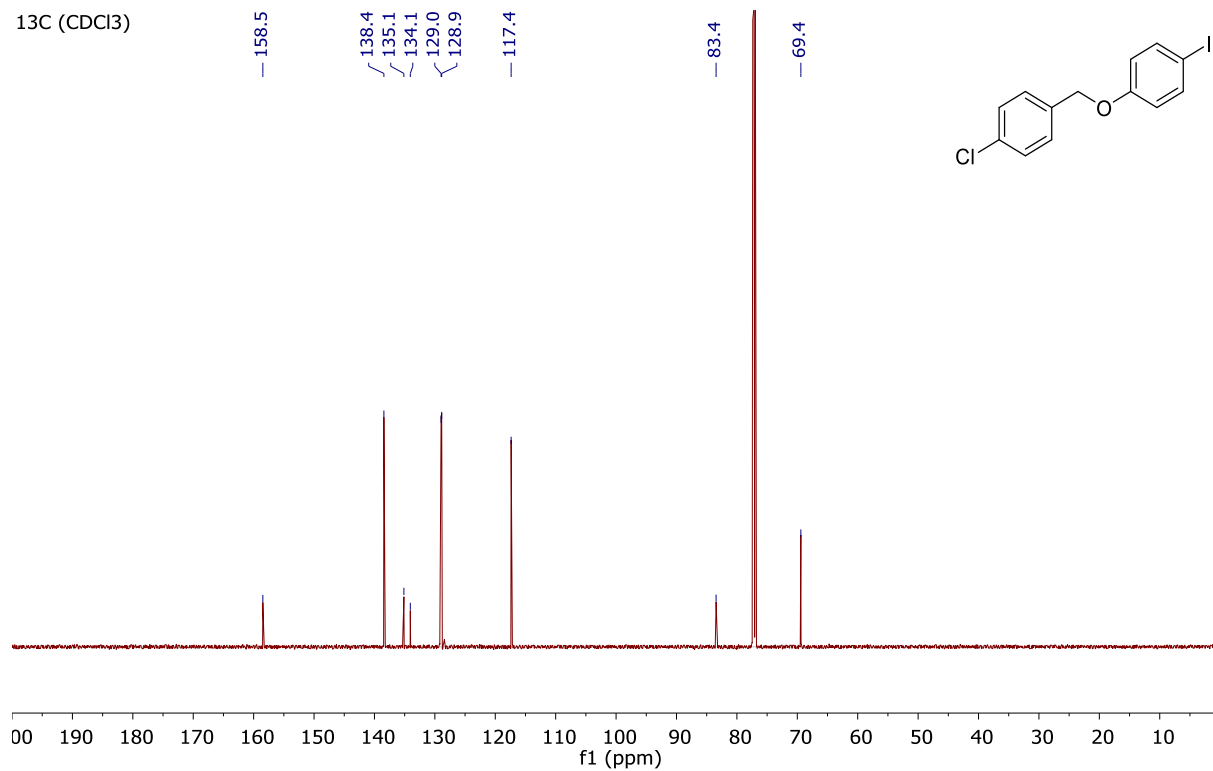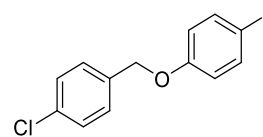

## 7. References

- [1] J. Ebels, S. Spirk, R. Pietschnig (2006) 10th International Electronic Conference on Synthetic Organic Chemistry (ECSOC-10), <https://www.usc.es/congresos/ecsoc/10/SST/d002/d002.pdf>.
- [2] A. Crochet, Katharina M. Fromm, *Z. Anorg. Allg. Chem.* **2010**, 636, 1484-1496.
- [3] W. Tyrra, D. Naumann, Y. L. Yagupolskii, *Journal of Fluorine Chemistry* **2003**, 123, 183-187.
- [4] C. Chen, L. Ouyang, Q. Lin, Y. Liu, C. Hou, Y. Yuan, Z. Weng, *Chem. Eur. J.* **2014**, 20, 657-661.
- [5] M. Aufiero, T. Sperger, A. S. K. Tsang, F. Schoenebeck, *Angew. Chem. Int. Ed.* **2015**, 54, 10322-10326.
- [6] Q. Lefebvre, R. Pluta, M. Rueping, *Chem. Commun.* **2015**, 51, 4394-4397.
- [7] M. Aufiero, T. Scattolin, F. Proutière, F. Schoenebeck, *Organometallics* **2015**, 34, 5191-5195.
- [8] Gaussian 09, Revision D.01, M. J. Frisch, G. W. Trucks, H. B. Schlegel, G. E. Scuseria, M. A. Robb, J. R. Cheeseman, G. Scalmani, V. Barone, B. Mennucci, G. A. Petersson, H. Nakatsuji, M. Caricato, X. Li, H. P. Hratchian, A. F. Izmaylov, J. Bloino, G. Zheng, J. L. Sonnenberg, M. Hada, M. Ehara, K. Toyota, R. Fukuda, J. Hasegawa, M. Ishida, T. Nakajima, Y. Honda, O. Kitao, H. Nakai, T. Vreven, J. A. Montgomery, Jr., J. E. Peralta, F. Ogliaro, M. Bearpark, J. J. Heyd, E. Brothers, K. N. Kudin, V. N. Staroverov, T. Keith, R. Kobayashi, J. Normand, K. Raghavachari, A. Rendell, J. C. Burant, S. S. Iyengar, J. Tomasi, M. Cossi, N. Rega, J. M. Millam, M. Klene, J. E. Knox, J. B. Cross, V. Bakken, C. Adamo, J. Jaramillo, R. Gomperts, R. E. Stratmann, O. Yazyev, A. J. Austin, R. Cammi, C. Pomelli, J. W. Ochterski, R. L. Martin, K. Morokuma, V. G. Zakrzewski, G. A. Voth, P. Salvador, J. J. Dannenberg, S. Dapprich, A. D. Daniels, O. Farkas, J. B. Foresman, J. V. Ortiz, J. Cioslowski, and D. J. Fox, Gaussian, Inc., Wallingford CT, 2013.
- [9] C. J. Cramer, *Essentials of Computational Chemistry: Theories and Models*; 2nd ed.; Wiley: New York, USA, 2004.
- [10] S. Grimme, J. Antony, S. Ehrlich, H. Krieg, *J. Chem. Phys.* **2010**, 132, 154104.
- [11] (a) D. P. Hruszkewycz, D. Balcells, L. M. Guard, N. Hazari, M. Tilset, *J. Am. Chem. Soc.* **2014**, 136, 7300-7316; (b) D. Rappoport, N. R. M. Crawford, F. Furche, K. Burke, in *Encyclopedia of Inorganic Chemistry*, John Wiley & Sons, Ltd, **2006**.
